# Supplementary material for: A polymer that reinforces luminal barrier function and attenuates inflammation in murine colitis
Source: Research Square preprint supplement (doi:10.21203/rs.3.rs-8290892/v1), 2026-06-19
Supplement: Supplementary file 1 [file 1d9dfc0cc84494894cb13b18.docx]

**Supplementary Figure Captions**

**Figure S1.** Representative 1H Nuclear Magnetic Resonance (NMR) spectrum. Colored markers indicate the assignment of characteristic proton resonances to their corresponding chemical groups in the polymer structure. Aromatic protons from the phenylboronic acid moieties were detected at 7.3-8.0 ppm (pink), while resonances corresponding to the polymer backbone appeared between 1.0 and 3.5 ppm (blue, green, and orange). Residual solvent peaks corresponding to water and methanol are indicated.

**Figure S2.** Body weight changes in wild-type mice during a 10-day treatment period with increasing concentrations of the polymer administered in drinking water. No substantial dose-dependent body weight loss was observed across treatment groups, supporting short-term tolerability. Data represent mean ± SEM.

**Figure S3.** Microbial alpha diversity across polymer treatment groups measured using the Shannon diversity index. No significant differences in microbial diversity were observed between groups. Groups sharing the same letter are not significantly different based on one-way ANOVA followed by Tukey’s HSD post hoc test (p < 0.05).

**Figure S4.** Detection of fluorescently labeled polymer in fecal samples over time following oral administration. A. Detection of different doses of fluorescein-labeled SLIPs in fecal pellets from wild-type mice administered various polymer doses. B. Fecal fluorescence increased rapidly after treatment initiation and reached a plateau within approximately 24 h, indicating sustained gastrointestinal transit during continuous administration. Following cessation of treatment at 144 h, fluorescence progressively declined toward baseline levels. Shaded regions represent variability across measurements.

**Figure S5.** Colonic proteomic analysis confirming marked depletion of MUC2 protein abundance in Agr2-/- mice relative to WT controls. Different letters indicate statistically significant differences between groups (p < 0.05).

**Figure S6.** Serum FITC-dextran concentrations following oral administration in *Agr2-/-* mice after 17 d of polymer treatment. Polymer-treated mice exhibited reduced FITC-dextran apparent translocation relative to untreated controls, consistent with decreased intestinal permeability. Bars represent mean ± SEM.

**Figure S7.** Serum FITC-dextran concentrations in mice subjected to DSS-induced colitis following polymer treatment. Polymer-treated DSS mice exhibited reduced FITC-dextran apparent translocation relative to DSS controls, consistent with improved intestinal barrier integrity. Bars represent mean ± SEM.

**Figure S8.** Control probes used in RNAscope to ensure signal specificity and tissue RNA integrity. Probe - PPIB (a medium-expression positive control) and Probe - Mm-Clec4f-C2 (C-type lectin domain family 4, member F gene, which is exclusively expressed by Kupffer cells in the liver, serving as a negative control).

**Figure S9.** Assessment of batch-associated variation across microbiome sequencing batches before and after ConQuR normalization. Principal coordinate analysis based on Aitchison distances is shown before (left) and after (right) application of the model. Colored points and ellipses represent samples from sequencing batches 1 (black), 2 (red), and 3 (green). Minimal clustering by batch was observed both before and after correction, indicating limited batch-associated variation in the dataset.
