# Supplementary material for: A polymer that reinforces luminal barrier function and attenuates inflammation in murine colitis
Source: Research Square preprint supplement (doi:10.21203/rs.3.rs-8290892/v1), 2026-06-19
Supplement: Supplementary file 2 [file 20a58718e3f833ccef08cb03.xlsx]

## Sheet: Table S1
Table S1. Variability in polymer batches and fluorescein methacrylate (FMA) labeled polimer molecular weights (Mn), dispersity (Đ), and phenylboronic acid (APBA) incorporation.
Polymer	Mn (Mda)	Đ	% APBA
P(DMA0.95n-co-APBA0.05n)	1.8 ± 0.032	1.16 ± 0.085	6 ± 1.21
P(DMA0.95n-co-APBA0.05n-co-FMA0.001n)	0.99	1.49	6.3
Mn and Đ were determined by Size Exclusion Chromatography (SEC) analysis, and % APBA was calculated from NMR integration. Values are the average of three batches ± SD.

## Sheet: Table S2
Table S2. Summary of linear model outputs evaluating the main and interactive effects of day and dose of SLIPs on weight (model: weight ~ day * Dose). Post hoc pairwise comparisons of estimated marginal means (EMMs) among dose levels within each day were conducted using the emmeans package. Reported values include effect estimates with standard errors, degrees of freedom, t-statistics, and adjust…
Contrast	Estimate	SE	df	t.ratio	p.value
(0 mg/mL) - (1.60 mg/mL)	-0.783	1.4	90	-0.558	0.9934
(0 mg/mL) - (2.50 mg/mL)	1.608	1.4	90	1.146	0.8607
(0 mg/mL) - (0.40 mg/mL)	0.276	1.57	90	0.176	1
(0 mg/mL) - (6.60 mg/mL)	1.787	1.4	90	1.273	0.7986
(0 mg/mL) - (0.80 mg/mL)	-0.527	1.4	90	-0.376	0.999
(1.60 mg/mL) - (0.40 mg/mL)	2.39	1.4	90	1.704	0.5331
(1.60 mg/mL) - (0.40 mg/mL)	1.059	1.57	90	0.675	0.9843
(1.60 mg/mL) - (6.60 mg/mL)	2.569	1.4	90	1.831	0.4514
(1.60 mg/mL) - (0.80 mg/mL)	0.256	1.4	90	0.182	1
(2.50 mg/mL) - (0.40 mg/mL)	-1.331	1.57	90	-0.849	0.9573
(2.50 mg/mL) - (6.60 mg/mL)	0.179	1.4	90	0.127	1
(2.50 mg/mL) - (0.80 mg/mL)	-2.135	1.4	90	-1.521	0.6515
(0.40 mg/mL) - (6.60 mg/mL)	1.51	1.57	90	0.963	0.9284
(0.40 mg/mL) - (0.40 mg/mL)	-0.803	1.57	90	-0.512	0.9956
(6.60 mg/mL) - (0.40 mg/mL)	-2.314	1.4	90	-1.649	0.5687

## Sheet: Table S3
Table S3. Pairwise PERMANOVA analysis based on Bray-Curtis distances calculated from species-level abundance data from fecal samples of wild-type mice treated with different doses of polymer over the ten-day treatment period.
Doses	F	R2	p-value	p-adjusted	Significance
0.40 mg/mL vs 0 mg/mL	1.9584	0.115483	0.133087	0.19963
0.40 mg/mL vs 1.66 mg/mL	1.42231	0.105966	0.174983	0.218728
0.40 mg/mL vs 0.83 mg/mL	2.46968	0.149953	0.0351965	0.0659934
0.40 mg/mL vs 2.5 mg/mL	3.02503	0.201333	0.0314968	0.0659934
0.40 mg/mL vs 6.60 mg/mL	8.04475	0.297461	9.999e-05	0.00037496	***
0 mg/mL vs 1.60 mg/mL	1.35736	0.0739407	0.170983	0.218728
0 mg/mL vs 0.80 mg/mL	1.30695	0.0643599	0.224378	0.240405
0 mg/mL vs 2.50 mg/mL	1.66616	0.0892608	0.0478952	0.0798254
0 mg/mL vs 6.60 mg/mL	6.31288	0.208257	9.999e-05	0.00037496	***
1.60 mg/mL vs 0.80 mg/mL	1.30684	0.0755102	0.207579	0.239515
1.60 mg/mL vs 2.50 mg/mL	1.07587	0.0713637	0.352965	0.352965
1.60 mg/mLvs 6.60 mg/mL	5.89057	0.219057	0.00019998	0.00059994	***
0.80 mg/mL vs 2.50 mg/mL	2.59539	0.139572	0.00049995	0.00124988	**
0.80 mg/mL vs 6.60 mg/mL	9.03177	0.281963	9.999e-05	0.00037496	***
2.50 mg/mL vs 6.60 mg/mL	3.73376	0.150958	9.999e-05	0.00037496	***

## Sheet: Table S4
Table S4. Differential abundance analysis calculated from species-level abundance data from fecal samples of wild-type mice treated with different doses of polymer over the ten-day treatment period.
Comparison	Taxa	diff.btw	diff.win	effect	overlap	we.ep	we.eBH	wi.ep	wi.eBH	P.adj	Significance	Method
0 mg/mL - 1.60 mg/mL	p__Firmicutes|c__Clostridia|o__Clostridiales|f__Lachnospiraceae|g__|s__Lachnospiraceae bacterium GAM79	0.318481	1.73873	0.135861	0.430799	0.404264	0.816742	0.609938	0.876524	0.876524		ALDEx2_t
0 mg/mL - 1.60 mg/mL	p__Firmicutes|c__Clostridia|o__Clostridiales|f__Lachnospiraceae|g__Lacrimispora|s__Lacrimispora saccharolytica	0.739649	1.91749	0.27609	0.333333	0.470791	0.839447	0.256959	0.721832	0.721832		ALDEx2_t
0 mg/mL - 1.60 mg/mL	p__Firmicutes|c__Clostridia|o__Clostridiales|f__Lachnospiraceae|g__Eisenbergiella|s__Eisenbergiella massiliensis	0.741427	1.79325	0.379723	0.306043	0.267553	0.76561	0.204173	0.692256	0.692256		ALDEx2_t
0 mg/mL - 1.60 mg/mL	p__Firmicutes|c__Clostridia|o__Clostridiales|f__Eubacteriaceae|g__Eubacterium|s__Eubacterium ventriosum	0.1828	2.14204	0.0663474	0.471735	0.662306	0.898241	0.762546	0.929087	0.929087		ALDEx2_t
0 mg/mL - 1.60 mg/mL	p__Firmicutes|c__Clostridia|o__Clostridiales|f__Clostridiaceae|g__Clostridium|s__Clostridium sp. BNL1100	1.29792	2.52381	0.384204	0.298828	0.429734	0.81573	0.171775	0.674946	0.674946		ALDEx2_t
0 mg/mL - 1.60 mg/mL	p__Firmicutes|c__Clostridia|o__Clostridiales|f__Oscillospiraceae|g__Dysosmobacter|s__Dysosmobacter welbionis	-0.182043	2.61177	-0.0506079	0.465887	0.421311	0.823376	0.817923	0.946254	0.946254		ALDEx2_t
0 mg/mL - 1.60 mg/mL	p__Firmicutes|c__Clostridia|o__Clostridiales|f__|g__Flintibacter|s__Flintibacter sp. KGMB00164	1.02131	2.78399	0.310992	0.321637	0.45444	0.830709	0.218077	0.70945	0.70945		ALDEx2_t
0 mg/mL - 1.60 mg/mL	p__Bacteroidetes|c__Bacteroidia|o__Bacteroidales|f__Muribaculaceae|g__Muribaculum|s__Muribaculum intestinale	0.0342763	6.3001	0.00465507	0.498047	0.74113	0.922804	0.826753	0.947535	0.947535		ALDEx2_t
0 mg/mL - 1.60 mg/mL	p__Firmicutes|c__Clostridia|o__Clostridiales|f__Eubacteriaceae|g__Eubacterium|s__Eubacterium coprostanoligenes	-2.351	4.95502	-0.43728	0.332031	0.169963	0.725047	0.250226	0.724668	0.724668		ALDEx2_t
0 mg/mL - 1.60 mg/mL	p__Firmicutes|c__Clostridia|o__Clostridiales|f__Lachnospiraceae|g__Lacrimispora|s__Lacrimispora sphenoides	0.70235	2.79466	0.152337	0.375	0.75807	0.925727	0.402718	0.790069	0.790069		ALDEx2_t
0 mg/mL - 1.60 mg/mL	p__Firmicutes|c__Clostridia|o__Clostridiales|f__Clostridiaceae|g__Hungatella|s__Hungatella hathewayi	-0.0812614	2.19976	-0.0310568	0.493177	0.797559	0.939345	0.840432	0.953004	0.953004		ALDEx2_t
0 mg/mL - 1.60 mg/mL	p__Firmicutes|c__Clostridia|o__Clostridiales|f__Lachnospiraceae|g__Anaerotaenia|s__Anaerotaenia torta	1.07933	2.32664	0.432591	0.3125	0.245548	0.75451	0.205225	0.692404	0.692404		ALDEx2_t
0 mg/mL - 1.60 mg/mL	p__Firmicutes|c__Clostridia|o__Clostridiales|f__Lachnospiraceae|g__Kineothrix|s__Kineothrix alysoides	0.823964	1.92478	0.341926	0.339844	0.212372	0.744988	0.291953	0.73998	0.73998		ALDEx2_t
0 mg/mL - 1.60 mg/mL	p__Firmicutes|c__Clostridia|o__Clostridiales|f__Ruminococcaceae|g__|s__[Eubacterium] siraeum	1.0349	3.61674	0.257379	0.361328	0.540078	0.860552	0.365904	0.769281	0.769281		ALDEx2_t
0 mg/mL - 1.60 mg/mL	p__Firmicutes|c__Clostridia|o__Clostridiales|f__Lachnospiraceae|g__Lachnoclostridium|s__Lachnoclostridium phytofermentans	1.18612	2.63671	0.346814	0.322266	0.609938	0.878689	0.261169	0.728469	0.728469		ALDEx2_t
0 mg/mL - 1.60 mg/mL	p__Firmicutes|c__Clostridia|o__Clostridiales|f__Christensenellaceae|g__Christensenella|s__Christensenella minuta	0.73301	3.39086	0.167402	0.423002	0.670134	0.89869	0.642698	0.882082	0.882082		ALDEx2_t
0 mg/mL - 1.60 mg/mL	p__Firmicutes|c__Clostridia|o__Clostridiales|f__Eubacteriaceae|g__Eubacterium|s__Eubacterium xylanophilum	1.02632	3.10176	0.239004	0.359375	0.558695	0.863395	0.352143	0.763501	0.763501		ALDEx2_t
0 mg/mL - 1.60 mg/mL	p__Firmicutes|c__Clostridia|o__Clostridiales|f__Oscillospiraceae|g__Oscillibacter|s__Oscillibacter valericigenes	-0.782604	3.42332	-0.182103	0.401559	0.53957	0.859154	0.532772	0.843588	0.843588		ALDEx2_t
0 mg/mL - 1.60 mg/mL	p__Firmicutes|c__Clostridia|o__Clostridiales|f__Ruminococcaceae|g__Flavonifractor|s__Flavonifractor plautii	1.06761	4.38255	0.198077	0.405458	0.634824	0.887277	0.569556	0.857663	0.857663		ALDEx2_t
0 mg/mL - 1.60 mg/mL	p__Firmicutes|c__Bacilli|o__Lactobacillales|f__Lactobacillaceae|g__Lactobacillus|s__Lactobacillus johnsonii	-1.33249	4.06857	-0.267808	0.395712	0.472289	0.833547	0.483532	0.817379	0.817379		ALDEx2_t
0 mg/mL - 1.60 mg/mL	p__Firmicutes|c__Clostridia|o__Clostridiales|f__Lachnospiraceae|g__Faecalimonas|s__Faecalimonas umbilicata	-0.364107	2.92337	-0.0900361	0.447266	0.417729	0.817544	0.688127	0.902144	0.902144		ALDEx2_t
0 mg/mL - 1.60 mg/mL	p__Firmicutes|c__Clostridia|o__Clostridiales|f__Ruminococcaceae|g__Ruminococcus|s__Ruminococcus champanellensis	0.133735	6.08656	0.0217417	0.48538	0.709567	0.912043	0.762474	0.92753	0.92753		ALDEx2_t
0 mg/mL - 1.60 mg/mL	p__Firmicutes|c__Clostridia|o__Clostridiales|f__Hungateiclostridiaceae|g__Hungateiclostridium|s__Hungateiclostridium alkalicellulosi	1.32268	3.60001	0.304302	0.348928	0.426598	0.81397	0.295717	0.735759	0.735759		ALDEx2_t
0 mg/mL - 1.60 mg/mL	p__Firmicutes|c__Clostridia|o__Clostridiales|f__Lachnospiraceae|g__Herbinix|s__Herbinix luporum	1.14599	2.26376	0.460128	0.289063	0.199113	0.728912	0.160402	0.655649	0.655649		ALDEx2_t
0 mg/mL - 1.60 mg/mL	p__Firmicutes|c__Clostridia|o__Clostridiales|f__Hungateiclostridiaceae|g__Pseudoclostridium|s__Pseudoclostridium thermosuccinogenes	1.33687	4.44265	0.258678	0.364522	0.641221	0.886815	0.417228	0.794458	0.794458		ALDEx2_t
0 mg/mL - 1.60 mg/mL	p__Firmicutes|c__Clostridia|o__Clostridiales|f__Lachnospiraceae|g__Lachnoclostridium|s__Lachnoclostridium sp. YL32	-0.657266	2.11691	-0.195304	0.354776	0.304756	0.775948	0.341775	0.755345	0.755345		ALDEx2_t
0 mg/mL - 1.60 mg/mL	p__Bacteroidetes|c__Bacteroidia|o__Bacteroidales|f__Rikenellaceae|g__Alistipes|s__Alistipes dispar	5.5119	5.70767	0.82584	0.19336	0.0629456	0.529114	0.0657026	0.475182	0.475182		ALDEx2_t
0 mg/mL - 1.60 mg/mL	p__Firmicutes|c__Clostridia|o__Clostridiales|f__Ruminococcaceae|g__Anaerotruncus|s__Anaerotruncus rubiinfantis	1.52924	2.4506	0.525402	0.233918	0.185511	0.690465	0.0773853	0.562512	0.562512		ALDEx2_t
0 mg/mL - 1.60 mg/mL	p__Firmicutes|c__Clostridia|o__Clostridiales|f__Lachnospiraceae|g__Acetatifactor|s__Acetatifactor muris	-0.655922	4.42642	-0.143844	0.394531	0.419422	0.816304	0.568363	0.855844	0.855844		ALDEx2_t
0 mg/mL - 1.60 mg/mL	p__Firmicutes|c__Clostridia|o__Clostridiales|f__Hungateiclostridiaceae|g__Hungateiclostridium|s__Hungateiclostridium aldrichii	1.56749	3.61693	0.324092	0.357422	0.545406	0.85514	0.342425	0.756091	0.756091		ALDEx2_t
0 mg/mL - 1.60 mg/mL	p__Firmicutes|c__Clostridia|o__Clostridiales|f__Ruminococcaceae|g__Phocea|s__Phocea massiliensis	0.487855	1.97313	0.160501	0.378168	0.649463	0.893746	0.46642	0.803451	0.803451		ALDEx2_t
0 mg/mL - 1.60 mg/mL	p__Firmicutes|c__Clostridia|o__Clostridiales|f__Lachnospiraceae|g__Blautia|s__Blautia sp. YL58	0.520168	3.01004	0.14339	0.413255	0.708473	0.913275	0.595639	0.864213	0.864213		ALDEx2_t
0 mg/mL - 1.60 mg/mL	p__Firmicutes|c__Clostridia|o__Clostridiales|f__Lachnospiraceae|g__Blautia|s__Blautia producta	1.10191	2.83351	0.307149	0.306641	0.41131	0.810321	0.218371	0.698215	0.698215		ALDEx2_t
0 mg/mL - 1.60 mg/mL	p__Firmicutes|c__Clostridia|o__Clostridiales|f__Lachnospiraceae|g__Enterocloster|s__Enterocloster bolteae	-0.106828	2.5704	-0.0303794	0.481481	0.62765	0.891076	0.686471	0.89797	0.89797		ALDEx2_t
0 mg/mL - 1.60 mg/mL	p__Firmicutes|c__Clostridia|o__Clostridiales|f__Lachnospiraceae|g__Lachnospira|s__Lachnospira eligens	-0.951169	2.79163	-0.28184	0.339181	0.214375	0.73661	0.335026	0.745155	0.745155		ALDEx2_t
0 mg/mL - 1.60 mg/mL	p__Firmicutes|c__Clostridia|o__Clostridiales|f__Peptostreptococcaceae|g__Romboutsia|s__Romboutsia ilealis	3.48792	5.68737	0.58507	0.233918	0.112461	0.62272	0.106576	0.556186	0.556186		ALDEx2_t
0 mg/mL - 1.60 mg/mL	p__Firmicutes|c__Clostridia|o__Clostridiales|f__Christensenellaceae|g__Christensenella|s__Christensenella massiliensis	1.04333	2.96028	0.291805	0.359375	0.668049	0.900831	0.357303	0.763326	0.763326		ALDEx2_t
0 mg/mL - 1.60 mg/mL	p__Firmicutes|c__Clostridia|o__Clostridiales|f__Lachnospiraceae|g__Butyrivibrio|s__Butyrivibrio crossotus	0.848149	2.81168	0.248123	0.382813	0.55643	0.857948	0.519957	0.831595	0.831595		ALDEx2_t
0 mg/mL - 1.60 mg/mL	p__Firmicutes|c__Clostridia|o__Clostridiales|f__Hungateiclostridiaceae|g__Hungateiclostridium|s__Hungateiclostridium saccincola	1.83808	3.17154	0.470518	0.273438	0.298919	0.742577	0.142483	0.625522	0.625522		ALDEx2_t
0 mg/mL - 1.60 mg/mL	p__Firmicutes|c__Clostridia|o__Clostridiales|f__Ruminococcaceae|g__Anaeromassilibacillus|s__Anaeromassilibacillus senegalensis	2.74909	5.11401	0.484253	0.296875	0.186101	0.697723	0.213081	0.653715	0.653715		ALDEx2_t
0 mg/mL - 1.60 mg/mL	p__Bacteroidetes|c__Bacteroidia|o__Bacteroidales|f__Muribaculaceae|g__Duncaniella|s__Duncaniella sp. B8	-1.40958	5.75002	-0.223434	0.392578	0.519572	0.854779	0.536387	0.836645	0.836645		ALDEx2_t
0 mg/mL - 1.60 mg/mL	p__Firmicutes|c__Clostridia|o__Clostridiales|f__Lachnospiraceae|g__Eisenbergiella|s__Eisenbergiella tayi	-0.364478	3.14731	-0.115406	0.436647	0.586208	0.87283	0.70192	0.905721	0.905721		ALDEx2_t
0 mg/mL - 1.60 mg/mL	p__Firmicutes|c__Clostridia|o__Clostridiales|f__Lachnospiraceae|g__Anaerocolumna|s__Anaerocolumna cellulosilytica	-0.630385	3.31835	-0.159715	0.439453	0.597464	0.871843	0.62191	0.870235	0.870235		ALDEx2_t
0 mg/mL - 1.60 mg/mL	p__Bacteroidetes|c__Bacteroidia|o__Bacteroidales|f__Rikenellaceae|g__Alistipes|s__Alistipes senegalensis	3.11371	5.20678	0.530078	0.263158	0.17208	0.636097	0.151585	0.568056	0.568056		ALDEx2_t
0 mg/mL - 1.60 mg/mL	p__Firmicutes|c__Clostridia|o__Clostridiales|f__Lachnospiraceae|g__Mediterraneibacter|s__[Ruminococcus] gnavus	0.454412	3.63959	0.124588	0.444444	0.679443	0.90743	0.723211	0.908253	0.908253		ALDEx2_t
0 mg/mL - 1.60 mg/mL	p__Firmicutes|c__Clostridia|o__Clostridiales|f__Hungateiclostridiaceae|g__Hungateiclostridium|s__Hungateiclostridium cellulolyticum	1.1949	4.84719	0.243437	0.391813	0.488107	0.828796	0.472044	0.803221	0.803221		ALDEx2_t
0 mg/mL - 1.60 mg/mL	p__Firmicutes|c__Clostridia|o__Clostridiales|f__Lachnospiraceae|g__Robinsoniella|s__Robinsoniella peoriensis	-1.51656	3.0339	-0.407001	0.292398	0.143965	0.701828	0.191581	0.666066	0.666066		ALDEx2_t
0 mg/mL - 1.60 mg/mL	p__Firmicutes|c__Clostridia|o__Clostridiales|f__Clostridiaceae|g__Clostridium|s__Clostridium sp. SY8519	1.05449	5.02376	0.211968	0.419922	0.591038	0.877983	0.609723	0.866552	0.866552		ALDEx2_t
0 mg/mL - 1.60 mg/mL	p__Firmicutes|c__Clostridia|o__Clostridiales|f__Ruminococcaceae|g__Ruminococcus|s__Ruminococcus bicirculans	-0.430979	4.23162	-0.0871735	0.45809	0.609878	0.881939	0.671291	0.890653	0.890653		ALDEx2_t
0 mg/mL - 1.60 mg/mL	p__Firmicutes|c__Clostridia|o__Clostridiales|f__Lachnospiraceae|g__Lacrimispora|s__Lacrimispora indolis	-0.797067	3.22729	-0.171268	0.386719	0.390477	0.798468	0.445432	0.795687	0.795687		ALDEx2_t
0 mg/mL - 1.60 mg/mL	p__Firmicutes|c__Clostridia|o__Clostridiales|f__Clostridiaceae|g__Geosporobacter|s__Geosporobacter ferrireducens	-0.515523	4.37935	-0.105604	0.452242	0.51744	0.846095	0.636945	0.876955	0.876955		ALDEx2_t
0 mg/mL - 1.60 mg/mL	p__Bacteroidetes|c__Bacteroidia|o__Bacteroidales|f__Rikenellaceae|g__Alistipes|s__Alistipes communis	1.87542	6.19006	0.309779	0.34308	0.279576	0.728317	0.365909	0.718737	0.718737		ALDEx2_t
0 mg/mL - 1.60 mg/mL	p__Firmicutes|c__Clostridia|o__Clostridiales|f__Hungateiclostridiaceae|g__Ruminiclostridium|s__Ruminiclostridium cellobioparum	2.92251	3.77304	0.663524	0.212891	0.128891	0.598835	0.0740355	0.500533	0.500533		ALDEx2_t
0 mg/mL - 1.60 mg/mL	p__Firmicutes|c__Clostridia|o__Clostridiales|f__Lachnospiraceae|g__Faecalicatena|s__Faecalicatena orotica	-0.779532	3.02885	-0.216917	0.388672	0.332222	0.785489	0.495401	0.820748	0.820748		ALDEx2_t
0 mg/mL - 1.60 mg/mL	p__Firmicutes|c__Clostridia|o__Clostridiales|f__Ruminococcaceae|g__Pseudoflavonifractor|s__Pseudoflavonifractor capillosus	0.966079	3.87402	0.225756	0.390625	0.539723	0.851309	0.456992	0.802758	0.802758		ALDEx2_t
0 mg/mL - 1.60 mg/mL	p__Firmicutes|c__Clostridia|o__Clostridiales|f__Oscillospiraceae|g__Oscillibacter|s__Oscillibacter sp. PEA192	-1.32457	3.4789	-0.323541	0.356725	0.300806	0.772476	0.351285	0.760878	0.760878		ALDEx2_t
0 mg/mL - 1.60 mg/mL	p__Firmicutes|c__Clostridia|o__Clostridiales|f__Lachnospiraceae|g__Roseburia|s__Roseburia intestinalis	-0.659846	3.571	-0.130862	0.426901	0.456868	0.833101	0.584688	0.857459	0.857459		ALDEx2_t
0 mg/mL - 1.60 mg/mL	p__Firmicutes|c__Clostridia|o__Clostridiales|f__Lachnospiraceae|g__|s__Lachnospiraceae bacterium Choco86	-1.29506	2.94096	-0.394101	0.332031	0.232355	0.738983	0.27516	0.716273	0.716273		ALDEx2_t
0 mg/mL - 1.60 mg/mL	p__Firmicutes|c__Clostridia|o__Clostridiales|f__Peptostreptococcaceae|g__Romboutsia|s__Romboutsia timonensis	0.815598	5.24338	0.138286	0.415205	0.449657	0.814426	0.481614	0.791549	0.791549		ALDEx2_t
0 mg/mL - 1.60 mg/mL	p__Firmicutes|c__Clostridia|o__Clostridiales|f__Lachnospiraceae|g__Blautia|s__Blautia sp. SC05B48	0.558739	3.20622	0.131903	0.430799	0.613303	0.886541	0.56662	0.855234	0.855234		ALDEx2_t
0 mg/mL - 1.60 mg/mL	p__Firmicutes|c__Clostridia|o__Clostridiales|f__Ruminococcaceae|g__Acetivibrio|s__Acetivibrio ethanolgignens	-1.28056	2.91006	-0.385735	0.276803	0.21471	0.72268	0.193194	0.639352	0.639352		ALDEx2_t
0 mg/mL - 1.60 mg/mL	p__Firmicutes|c__Clostridia|o__Clostridiales|f__Clostridiaceae|g__Clostridium|s__Clostridium botulinum	-0.101372	4.32174	-0.0198572	0.486328	0.644487	0.89627	0.69951	0.905143	0.905143		ALDEx2_t
0 mg/mL - 1.60 mg/mL	p__Candidatus Melainabacteria|c__|o__Vampirovibrionales|f__|g__Vampirovibrio|s__Vampirovibrio chlorellavorus	2.19071	5.77933	0.373036	0.329435	0.248717	0.720491	0.324678	0.708856	0.708856		ALDEx2_t
0 mg/mL - 1.60 mg/mL	p__Firmicutes|c__Clostridia|o__Clostridiales|f__Lachnospiraceae|g__Lachnoclostridium|s__[Clostridium] populeti	0.156833	3.39872	0.0360263	0.474609	0.597827	0.877903	0.672475	0.887604	0.887604		ALDEx2_t
0 mg/mL - 1.60 mg/mL	p__Firmicutes|c__Clostridia|o__Clostridiales|f__Catabacteriaceae|g__Catabacter|s__Catabacter hongkongensis	-0.42064	4.15249	-0.0870795	0.450292	0.593944	0.875576	0.645353	0.878692	0.878692		ALDEx2_t
0 mg/mL - 1.60 mg/mL	p__Firmicutes|c__Clostridia|o__Clostridiales|f__Hungateiclostridiaceae|g__Anaerobacterium|s__Anaerobacterium chartisolvens	-1.29937	3.79603	-0.304919	0.352827	0.310945	0.765696	0.324399	0.730688	0.730688		ALDEx2_t
0 mg/mL - 1.60 mg/mL	p__Firmicutes|c__Bacilli|o__Lactobacillales|f__Lactobacillaceae|g__Lactobacillus|s__Lactobacillus rogosae	-1.00127	4.8234	-0.176861	0.410156	0.469243	0.825555	0.494194	0.810741	0.810741		ALDEx2_t
0 mg/mL - 1.60 mg/mL	p__Firmicutes|c__Clostridia|o__Clostridiales|f__Lachnospiraceae|g__Lachnoclostridium|s__[Clostridium] polysaccharolyticum	-1.38052	3.3854	-0.344105	0.335938	0.29626	0.767944	0.301072	0.725103	0.725103		ALDEx2_t
0 mg/mL - 1.60 mg/mL	p__Firmicutes|c__Clostridia|o__Clostridiales|f__Ruminococcaceae|g__Paludicola|s__Paludicola psychrotolerans	1.89789	3.96955	0.407811	0.290448	0.282862	0.707399	0.197675	0.628086	0.628086		ALDEx2_t
0 mg/mL - 1.60 mg/mL	p__Firmicutes|c__Clostridia|o__Clostridiales|f__Lachnospiraceae|g__Lacrimispora|s__Lacrimispora celerecrescens	0.839284	3.83367	0.16499	0.427734	0.552235	0.856894	0.56262	0.845217	0.845217		ALDEx2_t
0 mg/mL - 1.60 mg/mL	p__Bacteroidetes|c__Bacteroidia|o__Bacteroidales|f__Rikenellaceae|g__Alistipes|s__Alistipes finegoldii	1.97897	4.81883	0.356188	0.317739	0.292267	0.724355	0.315491	0.679271	0.679271		ALDEx2_t
0 mg/mL - 1.60 mg/mL	p__Firmicutes|c__Clostridia|o__Clostridiales|f__Lachnospiraceae|g__Anaerostipes|s__Anaerostipes hadrus	-0.437632	3.71706	-0.119661	0.443359	0.557482	0.863523	0.575971	0.851138	0.851138		ALDEx2_t
0 mg/mL - 1.60 mg/mL	p__Firmicutes|c__Erysipelotrichia|o__Erysipelotrichales|f__Erysipelotrichaceae|g__Turicibacter|s__Turicibacter sp. H121	1.85346	5.22613	0.328374	0.356725	0.36335	0.767796	0.374815	0.74825	0.74825		ALDEx2_t
0 mg/mL - 1.60 mg/mL	p__Firmicutes|c__Clostridia|o__Clostridiales|f__Clostridiaceae|g__Clostridium|s__Clostridium sp. JN-9	-0.821533	4.96619	-0.163269	0.421053	0.545744	0.860108	0.563886	0.844674	0.844674		ALDEx2_t
0 mg/mL - 1.60 mg/mL	p__Firmicutes|c__Clostridia|o__Clostridiales|f__Clostridiaceae|g__Clostridium|s__Clostridium tarantellae	-1.99161	3.61811	-0.477579	0.296875	0.203899	0.695698	0.188008	0.633959	0.633959		ALDEx2_t
0 mg/mL - 1.60 mg/mL	p__Firmicutes|c__Clostridia|o__Clostridiales|f__Hungateiclostridiaceae|g__Ruminiclostridium|s__Ruminiclostridium cellulolyticum	-0.275162	4.19624	-0.0516788	0.467836	0.621148	0.884084	0.661873	0.890312	0.890312		ALDEx2_t
0 mg/mL - 1.60 mg/mL	p__Firmicutes|c__Clostridia|o__Clostridiales|f__Christensenellaceae|g__Christensenella|s__Christensenella timonensis	0.756524	4.28224	0.163874	0.427734	0.559415	0.860993	0.595206	0.854249	0.854249		ALDEx2_t
0 mg/mL - 1.60 mg/mL	p__Firmicutes|c__Clostridia|o__Clostridiales|f__Lachnospiraceae|g__Lacrimispora|s__Lacrimispora algidixylanolytica	-0.201708	3.57815	-0.0510542	0.473684	0.563293	0.862434	0.607388	0.863073	0.863073		ALDEx2_t
0 mg/mL - 1.60 mg/mL	p__Firmicutes|c__Clostridia|o__Clostridiales|f__Lachnospiraceae|g__Anaerostipes|s__Anaerostipes butyraticus	0.0960042	3.42028	0.0164117	0.487329	0.595479	0.873348	0.651789	0.885576	0.885576		ALDEx2_t
0 mg/mL - 1.60 mg/mL	p__Firmicutes|c__Clostridia|o__Clostridiales|f__|g__Intestinimonas|s__Intestinimonas butyriciproducens	-0.693189	4.10816	-0.133007	0.416016	0.515805	0.847313	0.528495	0.834814	0.834814		ALDEx2_t
0 mg/mL - 1.60 mg/mL	p__Bacteroidetes|c__Bacteroidia|o__Bacteroidales|f__Rikenellaceae|g__Alistipes|s__Alistipes onderdonkii	1.40363	5.05947	0.249306	0.37037	0.362661	0.759988	0.387182	0.743251	0.743251		ALDEx2_t
0 mg/mL - 1.60 mg/mL	p__Firmicutes|c__Erysipelotrichia|o__Erysipelotrichales|f__Erysipelotrichaceae|g__Breznakia|s__Breznakia pachnodae	0.719006	4.62915	0.128796	0.434698	0.529011	0.847374	0.574162	0.855913	0.855913		ALDEx2_t
0 mg/mL - 1.60 mg/mL	p__Firmicutes|c__Clostridia|o__Clostridiales|f__Ruminococcaceae|g__Pseudoflavonifractor|s__Pseudoflavonifractor phocaeensis	-0.983394	3.61551	-0.219981	0.384016	0.395901	0.798682	0.422423	0.779999	0.779999		ALDEx2_t
0 mg/mL - 1.60 mg/mL	p__Firmicutes|c__Clostridia|o__Clostridiales|f__Eubacteriaceae|g__Eubacterium|s__Eubacterium oxidoreducens	-0.760555	3.55658	-0.180943	0.401559	0.456484	0.827154	0.533152	0.835492	0.835492		ALDEx2_t
0 mg/mL - 1.60 mg/mL	p__Firmicutes|c__Clostridia|o__Clostridiales|f__|g__Colidextribacter|s__Colidextribacter massiliensis	0.274148	3.81491	0.0633157	0.46875	0.610083	0.884582	0.670764	0.890952	0.890952		ALDEx2_t
0 mg/mL - 1.60 mg/mL	p__Firmicutes|c__Clostridia|o__Clostridiales|f__Lachnospiraceae|g__Lacrimispora|s__Lacrimispora amygdalina	-1.00492	3.72683	-0.235737	0.368421	0.400235	0.79734	0.402712	0.768304	0.768304		ALDEx2_t
0 mg/mL - 1.60 mg/mL	p__Firmicutes|c__Clostridia|o__Clostridiales|f__Lachnospiraceae|g__Anaerostipes|s__Anaerostipes rhamnosivorans	-2.35414	3.33211	-0.635584	0.22461	0.0939473	0.598528	0.0812758	0.498165	0.498165		ALDEx2_t
0 mg/mL - 1.60 mg/mL	p__Firmicutes|c__Clostridia|o__Clostridiales|f__Clostridiaceae|g__Clostridium|s__Clostridium merdae	2.55523	5.15	0.433398	0.294347	0.259304	0.705332	0.279412	0.67023	0.67023		ALDEx2_t
0 mg/mL - 1.60 mg/mL	p__Bacteroidetes|c__Bacteroidia|o__Bacteroidales|f__Rikenellaceae|g__Alistipes|s__Alistipes putredinis	2.49556	4.49838	0.524426	0.245614	0.174608	0.627433	0.153783	0.565771	0.565771		ALDEx2_t
0 mg/mL - 1.60 mg/mL	p__Firmicutes|c__Clostridia|o__Clostridiales|f__Lachnospiraceae|g__Schaedlerella|s__Schaedlerella arabinosiphila	0.142711	3.95188	0.0363077	0.484375	0.610741	0.875662	0.669398	0.887317	0.887317		ALDEx2_t
0 mg/mL - 1.60 mg/mL	p__Firmicutes|c__Clostridia|o__Clostridiales|f__Hungateiclostridiaceae|g__Hungateiclostridium|s__Hungateiclostridium straminisolvens	-0.699895	4.09402	-0.138881	0.414063	0.528477	0.853143	0.573312	0.848718	0.848718		ALDEx2_t
0 mg/mL - 1.60 mg/mL	p__Firmicutes|c__Clostridia|o__Clostridiales|f__Lachnospiraceae|g__Anaerotignum|s__Anaerotignum lactatifermentans	-0.415379	3.39973	-0.0961051	0.438597	0.580833	0.864088	0.582378	0.852994	0.852994		ALDEx2_t
0 mg/mL - 1.60 mg/mL	p__Firmicutes|c__Clostridia|o__Clostridiales|f__Lachnospiraceae|g__Parasporobacterium|s__Parasporobacterium paucivorans	0.211762	3.93249	0.0491066	0.476563	0.539069	0.860186	0.583604	0.852857	0.852857		ALDEx2_t
0 mg/mL - 1.60 mg/mL	p__Firmicutes|c__Clostridia|o__Clostridiales|f__Lachnospiraceae|g__Lachnoclostridium|s__Lachnoclostridium pacaense	-2.32051	3.46207	-0.585664	0.226121	0.131574	0.603006	0.106273	0.505431	0.505431		ALDEx2_t
0 mg/mL - 1.60 mg/mL	p__Firmicutes|c__Clostridia|o__Clostridiales|f__Peptococcaceae|g__Dehalobacterium|s__Dehalobacterium formicoaceticum	-0.736463	4.41691	-0.142668	0.431641	0.48641	0.821069	0.505014	0.812264	0.812264		ALDEx2_t
0 mg/mL - 1.60 mg/mL	p__Firmicutes|c__Clostridia|o__Clostridiales|f__|g__Ihubacter|s__Ihubacter massiliensis	0.336729	4.1574	0.0740983	0.465887	0.563877	0.861628	0.627451	0.867339	0.867339		ALDEx2_t
0 mg/mL - 1.60 mg/mL	p__Bacteroidetes|c__Bacteroidia|o__Bacteroidales|f__Rikenellaceae|g__Alistipes|s__Alistipes megaguti	2.6708	4.50775	0.549289	0.253906	0.218271	0.6628	0.194086	0.608339	0.608339		ALDEx2_t
0 mg/mL - 1.60 mg/mL	p__Firmicutes|c__Clostridia|o__Clostridiales|f__Clostridiaceae|g__Clostridium|s__Clostridium saudiense	0.419559	4.21453	0.0892195	0.458984	0.544635	0.850354	0.628779	0.872433	0.872433		ALDEx2_t
0 mg/mL - 1.60 mg/mL	p__Firmicutes|c__Clostridia|o__Clostridiales|f__Lachnospiraceae|g__Faecalicatena|s__Faecalicatena fissicatena	-1.81048	3.83348	-0.40787	0.265625	0.27116	0.705995	0.202662	0.612919	0.612919		ALDEx2_t
0 mg/mL - 1.60 mg/mL	p__Firmicutes|c__Clostridia|o__Clostridiales|f__Peptococcaceae|g__|s__Peptococcaceae bacterium DCMF	-0.650297	4.37924	-0.128306	0.435547	0.516158	0.844759	0.565566	0.851852	0.851852		ALDEx2_t
0 mg/mL - 1.60 mg/mL	p__Firmicutes|c__Clostridia|o__Clostridiales|f__Ruminococcaceae|g__Faecalibacterium|s__Faecalibacterium prausnitzii	0.0964726	3.71485	0.0248602	0.484375	0.553196	0.860725	0.583409	0.852418	0.852418		ALDEx2_t
0 mg/mL - 1.60 mg/mL	p__Tenericutes|c__Mollicutes|o__Entomoplasmatales|f__Spiroplasmataceae|g__Spiroplasma|s__Spiroplasma syrphidicola	2.08873	4.43928	0.426289	0.323587	0.335893	0.760416	0.320245	0.720938	0.720938		ALDEx2_t
0 mg/mL - 1.60 mg/mL	p__Firmicutes|c__Clostridia|o__Clostridiales|f__Hungateiclostridiaceae|g__Hungateiclostridium|s__Hungateiclostridium thermocellum	-1.25482	4.18073	-0.268249	0.359375	0.413231	0.798678	0.419531	0.772069	0.772069		ALDEx2_t
0 mg/mL - 1.60 mg/mL	p__Firmicutes|c__Clostridia|o__Clostridiales|f__Clostridiaceae|g__Falcatimonas|s__Falcatimonas natans	-0.201981	4.0515	-0.0480867	0.472656	0.532779	0.846141	0.598085	0.859007	0.859007		ALDEx2_t
0 mg/mL - 1.60 mg/mL	p__Firmicutes|c__Clostridia|o__Clostridiales|f__Ruminococcaceae|g__Acutalibacter|s__Acutalibacter muris	-1.34881	3.58654	-0.346097	0.310547	0.332614	0.758043	0.301561	0.698236	0.698236		ALDEx2_t
0 mg/mL - 1.60 mg/mL	p__Firmicutes|c__Clostridia|o__Clostridiales|f__|g__Monoglobus|s__Monoglobus pectinilyticus	1.13422	4.42786	0.217368	0.389864	0.416994	0.792622	0.443965	0.778699	0.778699		ALDEx2_t
0 mg/mL - 1.60 mg/mL	p__Firmicutes|c__Erysipelotrichia|o__Erysipelotrichales|f__Erysipelotrichaceae|g__Faecalitalea|s__Faecalitalea cylindroides	0.0798851	4.3791	0.0230533	0.489279	0.565211	0.86417	0.615376	0.863102	0.863102		ALDEx2_t
0 mg/mL - 1.60 mg/mL	p__Firmicutes|c__Clostridia|o__Clostridiales|f__Peptostreptococcaceae|g__Clostridioides|s__Clostridioides difficile	-0.356991	4.27228	-0.0722766	0.460938	0.548141	0.858724	0.582541	0.851572	0.851572		ALDEx2_t
0 mg/mL - 1.60 mg/mL	p__Firmicutes|c__Clostridia|o__Clostridiales|f__Lachnospiraceae|g__|s__Lachnospiraceae bacterium oral taxon 500	-1.91033	3.60293	-0.493218	0.269006	0.1787	0.666117	0.165588	0.599865	0.599865		ALDEx2_t
0 mg/mL - 1.60 mg/mL	p__Firmicutes|c__Clostridia|o__Clostridiales|f__Ruminococcaceae|g__|s__[Clostridium] methylpentosum	-0.234325	3.51394	-0.0503673	0.471735	0.534451	0.85749	0.570223	0.852657	0.852657		ALDEx2_t
0 mg/mL - 1.60 mg/mL	p__Firmicutes|c__Clostridia|o__Clostridiales|f__Clostridiaceae|g__Clostridium|s__Clostridium disporicum	-0.559888	4.40858	-0.10736	0.435547	0.531981	0.849692	0.558973	0.834166	0.834166		ALDEx2_t
0 mg/mL - 1.60 mg/mL	p__Tenericutes|c__Mollicutes|o__Entomoplasmatales|f__Spiroplasmataceae|g__Spiroplasma|s__Spiroplasma lampyridicola	-0.431538	4.66672	-0.0888635	0.467836	0.57125	0.864797	0.574018	0.849584	0.849584		ALDEx2_t
0 mg/mL - 1.60 mg/mL	p__Firmicutes|c__Clostridia|o__Clostridiales|f__Hungateiclostridiaceae|g__Hungateiclostridium|s__Hungateiclostridium clariflavum	0.132609	4.20877	0.0255517	0.476563	0.547193	0.853693	0.568228	0.847537	0.847537		ALDEx2_t
0 mg/mL - 1.60 mg/mL	p__Firmicutes|c__Clostridia|o__Clostridiales|f__Ruminococcaceae|g__Hydrogenoanaerobacterium|s__Hydrogenoanaerobacterium saccharovorans	-0.7482	4.00531	-0.17225	0.414063	0.510246	0.84036	0.52623	0.833267	0.833267		ALDEx2_t
0 mg/mL - 1.60 mg/mL	p__Tenericutes|c__Mollicutes|o__Entomoplasmatales|f__Spiroplasmataceae|g__Spiroplasma|s__Spiroplasma chrysopicola	0.187656	4.00483	0.0336206	0.477583	0.526863	0.855939	0.579467	0.850221	0.850221		ALDEx2_t
0 mg/mL - 1.60 mg/mL	p__Firmicutes|c__Clostridia|o__Clostridiales|f__Lachnospiraceae|g__Roseburia|s__Roseburia hominis	-1.52173	3.86851	-0.311232	0.328125	0.373354	0.765812	0.32409	0.697215	0.697215		ALDEx2_t
0 mg/mL - 1.60 mg/mL	p__Firmicutes|c__Clostridia|o__Clostridiales|f__Lachnospiraceae|g__Anaerocolumna|s__Anaerocolumna xylanovorans	-1.45289	3.74429	-0.326242	0.335283	0.329819	0.755821	0.298343	0.695135	0.695135		ALDEx2_t
0 mg/mL - 1.60 mg/mL	p__Firmicutes|c__Clostridia|o__Clostridiales|f__Lachnospiraceae|g__Bariatricus|s__Bariatricus massiliensis	-0.636419	3.98757	-0.126405	0.423002	0.505079	0.842099	0.552488	0.838133	0.838133		ALDEx2_t
0 mg/mL - 1.60 mg/mL	p__Firmicutes|c__Clostridia|o__Clostridiales|f__Ruminococcaceae|g__Papillibacter|s__Papillibacter cinnamivorans	0.399327	3.88533	0.0724119	0.450292	0.524281	0.850449	0.570976	0.848662	0.848662		ALDEx2_t
0 mg/mL - 1.60 mg/mL	p__Firmicutes|c__Clostridia|o__Clostridiales|f__Ruminococcaceae|g__Negativibacillus|s__Negativibacillus massiliensis	-0.212606	4.15776	-0.0448152	0.481481	0.515314	0.840746	0.565483	0.843044	0.843044		ALDEx2_t
0 mg/mL - 1.60 mg/mL	p__Firmicutes|c__Clostridia|o__Clostridiales|f__Lachnospiraceae|g__Faecalicatena|s__Faecalicatena contorta	-1.02475	3.27341	-0.269055	0.366472	0.352879	0.774121	0.36843	0.733548	0.733548		ALDEx2_t
0 mg/mL - 1.60 mg/mL	p__Firmicutes|c__Clostridia|o__Clostridiales|f__Clostridiaceae|g__Hungatella|s__Hungatella xylanolytica	-0.398565	4.44353	-0.0882695	0.444444	0.508037	0.833583	0.518943	0.818174	0.818174		ALDEx2_t
0 mg/mL - 1.60 mg/mL	p__Firmicutes|c__Clostridia|o__Clostridiales|f__Lachnospiraceae|g__Anaerobutyricum|s__Anaerobutyricum hallii	-1.07814	4.28676	-0.209222	0.373047	0.439569	0.810525	0.448314	0.782509	0.782509		ALDEx2_t
0 mg/mL - 1.60 mg/mL	p__Firmicutes|c__Clostridia|o__Clostridiales|f__Ruminococcaceae|g__Caproiciproducens|s__Caproiciproducens galactitolivorans	0.708585	4.91364	0.124011	0.450292	0.502391	0.839004	0.553395	0.832263	0.832263		ALDEx2_t
0 mg/mL - 1.60 mg/mL	p__Firmicutes|c__Clostridia|o__Clostridiales|f__Ruminococcaceae|g__Tepidibaculum|s__Tepidibaculum saccharolyticum	1.05768	4.3405	0.201981	0.396484	0.472772	0.812388	0.414203	0.768432	0.768432		ALDEx2_t
0 mg/mL - 1.60 mg/mL	p__Firmicutes|c__Clostridia|o__Clostridiales|f__Lachnospiraceae|g__Anaerotignum|s__Anaerotignum aminivorans	0.225751	4.08199	0.037836	0.479532	0.533105	0.848495	0.57517	0.842559	0.842559		ALDEx2_t
0 mg/mL - 1.60 mg/mL	p__Firmicutes|c__Clostridia|o__Clostridiales|f__Ruminococcaceae|g__|s__[Clostridium] viride	0.446155	4.36071	0.0836535	0.466797	0.509634	0.841691	0.534627	0.835027	0.835027		ALDEx2_t
0 mg/mL - 1.60 mg/mL	p__Firmicutes|c__Clostridia|o__Clostridiales|f__Clostridiaceae|g__Butyricicoccus|s__Butyricicoccus pullicaecorum	0.156661	4.28205	0.0373058	0.489279	0.531027	0.853665	0.538316	0.83555	0.83555		ALDEx2_t
0 mg/mL - 1.60 mg/mL	p__Firmicutes|c__Clostridia|o__Clostridiales|f__Hungateiclostridiaceae|g__|s__Hungateiclostridiaceae bacterium KB18	0.0674417	4.13352	0.0152649	0.494141	0.484905	0.826617	0.539835	0.832913	0.832913		ALDEx2_t
0 mg/mL - 1.60 mg/mL	p__Firmicutes|c__Clostridia|o__Clostridiales|f__Clostridiaceae|g__Clostridium|s__Clostridium beijerinckii	-0.764452	4.15689	-0.151218	0.40625	0.470635	0.82387	0.481849	0.803779	0.803779		ALDEx2_t
0 mg/mL - 1.60 mg/mL	p__Firmicutes|c__Clostridia|o__Clostridiales|f__|g__Massilistercora|s__Massilistercora timonensis	-0.542648	4.11861	-0.10281	0.429688	0.484449	0.826475	0.513943	0.808706	0.808706		ALDEx2_t
0 mg/mL - 1.60 mg/mL	p__Firmicutes|c__Clostridia|o__Clostridiales|f__Lachnospiraceae|g__Lachnoclostridium|s__[Clostridium] scindens	-0.370418	4.2324	-0.0732908	0.470703	0.531313	0.848614	0.557435	0.829364	0.829364		ALDEx2_t
0 mg/mL - 1.60 mg/mL	p__Firmicutes|c__Clostridia|o__Clostridiales|f__Ruminococcaceae|g__Harryflintia|s__Harryflintia acetispora	-0.218723	4.27025	-0.046905	0.475634	0.498116	0.832619	0.543972	0.828277	0.828277		ALDEx2_t
0 mg/mL - 1.60 mg/mL	p__Firmicutes|c__Clostridia|o__Clostridiales|f__Clostridiaceae|g__Clostridium|s__Clostridium ventriculi	-0.414137	4.23037	-0.086504	0.457031	0.501074	0.838224	0.552715	0.836726	0.836726		ALDEx2_t
0 mg/mL - 1.60 mg/mL	p__Firmicutes|c__Clostridia|o__Clostridiales|f__Lachnospiraceae|g__Blautia|s__Blautia sp. N6H1-15	-0.241822	4.12956	-0.0545598	0.475634	0.512512	0.83484	0.526201	0.818681	0.818681		ALDEx2_t
0 mg/mL - 1.60 mg/mL	p__Firmicutes|c__Clostridia|o__Clostridiales|f__Lachnospiraceae|g__Marvinbryantia|s__Marvinbryantia formatexigens	0.203286	3.80851	0.0428093	0.474609	0.521558	0.846925	0.548281	0.831654	0.831654		ALDEx2_t
0 mg/mL - 1.60 mg/mL	p__Firmicutes|c__Clostridia|o__Clostridiales|f__|g__|s__Clostridiales bacterium CCNA10	0.266092	3.92322	0.0612737	0.465887	0.445021	0.806849	0.503364	0.804165	0.804165		ALDEx2_t
0 mg/mL - 1.60 mg/mL	p__Firmicutes|c__Clostridia|o__Clostridiales|f__Clostridiaceae|g__Clostridium|s__Clostridium subterminale	0.171679	4.35592	0.0343085	0.477583	0.498073	0.836529	0.542396	0.826989	0.826989		ALDEx2_t
0 mg/mL - 1.60 mg/mL	p__Verrucomicrobia|c__Verrucomicrobiae|o__Verrucomicrobiales|f__Akkermansiaceae|g__Akkermansia|s__Akkermansia muciniphila	0.324906	4.19282	0.0504473	0.467836	0.489674	0.826863	0.509779	0.813403	0.813403		ALDEx2_t
0 mg/mL - 2.50 mg/mL	p__Firmicutes|c__Clostridia|o__Clostridiales|f__Lachnospiraceae|g__|s__Lachnospiraceae bacterium GAM79	-0.606249	1.85965	-0.268106	0.356725	0.540466	0.848193	0.332796	0.810066	0.810066		ALDEx2_t
0 mg/mL - 2.50 mg/mL	p__Firmicutes|c__Clostridia|o__Clostridiales|f__Lachnospiraceae|g__Lacrimispora|s__Lacrimispora saccharolytica	-0.028369	1.52645	-0.0205906	0.488281	0.705708	0.900914	0.84799	0.967309	0.967309		ALDEx2_t
0 mg/mL - 2.50 mg/mL	p__Firmicutes|c__Clostridia|o__Clostridiales|f__Lachnospiraceae|g__Eisenbergiella|s__Eisenbergiella massiliensis	0.180009	1.13365	0.104633	0.421053	0.511149	0.840261	0.645193	0.912111	0.912111		ALDEx2_t
0 mg/mL - 2.50 mg/mL	p__Firmicutes|c__Clostridia|o__Clostridiales|f__Eubacteriaceae|g__Eubacterium|s__Eubacterium ventriosum	-0.962544	2.32156	-0.380801	0.335283	0.235168	0.729448	0.293643	0.791835	0.791835		ALDEx2_t
0 mg/mL - 2.50 mg/mL	p__Firmicutes|c__Clostridia|o__Clostridiales|f__Clostridiaceae|g__Clostridium|s__Clostridium sp. BNL1100	0.400487	1.89445	0.203642	0.404297	0.485202	0.829793	0.526999	0.885112	0.885112		ALDEx2_t
0 mg/mL - 2.50 mg/mL	p__Firmicutes|c__Clostridia|o__Clostridiales|f__Oscillospiraceae|g__Dysosmobacter|s__Dysosmobacter welbionis	0.172925	1.83143	0.0973481	0.451172	0.732533	0.908091	0.801677	0.950592	0.950592		ALDEx2_t
0 mg/mL - 2.50 mg/mL	p__Firmicutes|c__Clostridia|o__Clostridiales|f__|g__Flintibacter|s__Flintibacter sp. KGMB00164	0.979506	1.697	0.492701	0.234375	0.0798062	0.612739	0.0761086	0.560769	0.560769		ALDEx2_t
0 mg/mL - 2.50 mg/mL	p__Firmicutes|c__Clostridia|o__Clostridiales|f__Eubacteriaceae|g__Eubacterium|s__Eubacterium coprostanoligenes	-0.0359626	3.19823	-0.00965833	0.497076	0.75351	0.918511	0.87559	0.97136	0.97136		ALDEx2_t
0 mg/mL - 2.50 mg/mL	p__Firmicutes|c__Clostridia|o__Clostridiales|f__Lachnospiraceae|g__Lacrimispora|s__Lacrimispora sphenoides	0.342072	1.79579	0.142301	0.419922	0.394988	0.794607	0.544437	0.882466	0.882466		ALDEx2_t
0 mg/mL - 2.50 mg/mL	p__Firmicutes|c__Clostridia|o__Clostridiales|f__Clostridiaceae|g__Hungatella|s__Hungatella hathewayi	0.222131	1.60621	0.119924	0.436647	0.621986	0.875109	0.603092	0.897865	0.897865		ALDEx2_t
0 mg/mL - 2.50 mg/mL	p__Bacteroidetes|c__Bacteroidia|o__Bacteroidales|f__Muribaculaceae|g__Muribaculum|s__Muribaculum intestinale	0.305171	6.44408	0.0484483	0.475634	0.719139	0.903462	0.819038	0.958488	0.958488		ALDEx2_t
0 mg/mL - 2.50 mg/mL	p__Firmicutes|c__Clostridia|o__Clostridiales|f__Lachnospiraceae|g__Anaerotaenia|s__Anaerotaenia torta	0.416628	1.72582	0.242738	0.409357	0.37898	0.78558	0.546934	0.889532	0.889532		ALDEx2_t
0 mg/mL - 2.50 mg/mL	p__Firmicutes|c__Clostridia|o__Clostridiales|f__Lachnospiraceae|g__Kineothrix|s__Kineothrix alysoides	0.0188815	1.12344	0.0139205	0.493177	0.515716	0.839458	0.654773	0.906458	0.906458		ALDEx2_t
0 mg/mL - 2.50 mg/mL	p__Firmicutes|c__Clostridia|o__Clostridiales|f__Lachnospiraceae|g__Lachnoclostridium|s__Lachnoclostridium phytofermentans	0.646973	2.05667	0.301529	0.375	0.335009	0.772624	0.417117	0.849272	0.849272		ALDEx2_t
0 mg/mL - 2.50 mg/mL	p__Firmicutes|c__Clostridia|o__Clostridiales|f__Oscillospiraceae|g__Oscillibacter|s__Oscillibacter valericigenes	0.387658	1.7333	0.160043	0.419103	0.258799	0.737588	0.561774	0.883438	0.883438		ALDEx2_t
0 mg/mL - 2.50 mg/mL	p__Firmicutes|c__Clostridia|o__Clostridiales|f__Ruminococcaceae|g__Flavonifractor|s__Flavonifractor plautii	2.11284	2.61864	0.700813	0.1875	0.0294821	0.495973	0.0249865	0.426673	0.426673		ALDEx2_t
0 mg/mL - 2.50 mg/mL	p__Firmicutes|c__Clostridia|o__Clostridiales|f__Ruminococcaceae|g__|s__[Eubacterium] siraeum	-0.832109	3.58829	-0.209635	0.410156	0.42195	0.80389	0.53574	0.885946	0.885946		ALDEx2_t
0 mg/mL - 2.50 mg/mL	p__Firmicutes|c__Clostridia|o__Clostridiales|f__Lachnospiraceae|g__Lachnoclostridium|s__Lachnoclostridium sp. YL32	-0.391805	1.78258	-0.142101	0.400391	0.377177	0.780869	0.476659	0.854899	0.854899		ALDEx2_t
0 mg/mL - 2.50 mg/mL	p__Firmicutes|c__Clostridia|o__Clostridiales|f__Ruminococcaceae|g__Phocea|s__Phocea massiliensis	1.0738	1.66309	0.619022	0.244141	0.0837945	0.595571	0.0829081	0.561189	0.561189		ALDEx2_t
0 mg/mL - 2.50 mg/mL	p__Firmicutes|c__Clostridia|o__Clostridiales|f__Lachnospiraceae|g__Faecalimonas|s__Faecalimonas umbilicata	-0.402981	1.98589	-0.166102	0.40625	0.628275	0.87788	0.621699	0.90416	0.90416		ALDEx2_t
0 mg/mL - 2.50 mg/mL	p__Firmicutes|c__Clostridia|o__Clostridiales|f__Ruminococcaceae|g__Anaerotruncus|s__Anaerotruncus rubiinfantis	1.64069	1.72207	0.882612	0.120858	0.0144667	0.392995	0.0088999	0.306024	0.306024		ALDEx2_t
0 mg/mL - 2.50 mg/mL	p__Firmicutes|c__Clostridia|o__Clostridiales|f__Lachnospiraceae|g__Acetatifactor|s__Acetatifactor muris	0.187892	2.19418	0.0653994	0.473684	0.52103	0.839322	0.801828	0.953657	0.953657		ALDEx2_t
0 mg/mL - 2.50 mg/mL	p__Firmicutes|c__Clostridia|o__Clostridiales|f__Christensenellaceae|g__Christensenella|s__Christensenella minuta	-0.531687	2.84307	-0.171911	0.425781	0.516157	0.839021	0.592862	0.900606	0.900606		ALDEx2_t
0 mg/mL - 2.50 mg/mL	p__Firmicutes|c__Clostridia|o__Clostridiales|f__Lachnospiraceae|g__Herbinix|s__Herbinix luporum	0.385989	1.8519	0.197305	0.421053	0.53767	0.838368	0.621752	0.902356	0.902356		ALDEx2_t
0 mg/mL - 2.50 mg/mL	p__Firmicutes|c__Clostridia|o__Clostridiales|f__Eubacteriaceae|g__Eubacterium|s__Eubacterium xylanophilum	-0.731066	2.7455	-0.222909	0.339844	0.35978	0.77329	0.327263	0.794906	0.794906		ALDEx2_t
0 mg/mL - 2.50 mg/mL	p__Firmicutes|c__Clostridia|o__Clostridiales|f__Lachnospiraceae|g__Blautia|s__Blautia sp. YL58	0.379884	1.74613	0.181429	0.407407	0.392634	0.788377	0.497418	0.861924	0.861924		ALDEx2_t
0 mg/mL - 2.50 mg/mL	p__Firmicutes|c__Clostridia|o__Clostridiales|f__Lachnospiraceae|g__Enterocloster|s__Enterocloster bolteae	0.178923	1.90954	0.0642888	0.45614	0.609756	0.866293	0.692557	0.926446	0.926446		ALDEx2_t
0 mg/mL - 2.50 mg/mL	p__Bacteroidetes|c__Bacteroidia|o__Bacteroidales|f__Muribaculaceae|g__Duncaniella|s__Duncaniella sp. B8	0.501551	5.71648	0.0968612	0.460938	0.680962	0.892763	0.756142	0.939243	0.939243		ALDEx2_t
0 mg/mL - 2.50 mg/mL	p__Firmicutes|c__Bacilli|o__Lactobacillales|f__Lactobacillaceae|g__Lactobacillus|s__Lactobacillus johnsonii	-2.22634	3.53567	-0.608731	0.255859	0.0668529	0.589745	0.0854812	0.578561	0.578561		ALDEx2_t
0 mg/mL - 2.50 mg/mL	p__Firmicutes|c__Clostridia|o__Clostridiales|f__Lachnospiraceae|g__Lachnospira|s__Lachnospira eligens	-1.2494	3.03163	-0.380054	0.300195	0.121914	0.654201	0.188988	0.692042	0.692042		ALDEx2_t
0 mg/mL - 2.50 mg/mL	p__Firmicutes|c__Clostridia|o__Clostridiales|f__Hungateiclostridiaceae|g__Hungateiclostridium|s__Hungateiclostridium alkalicellulosi	-0.424497	3.18515	-0.106167	0.443359	0.67272	0.888902	0.673841	0.91842	0.91842		ALDEx2_t
0 mg/mL - 2.50 mg/mL	p__Firmicutes|c__Clostridia|o__Clostridiales|f__Lachnospiraceae|g__Blautia|s__Blautia producta	0.436239	1.82241	0.188809	0.367188	0.531861	0.840664	0.376221	0.812881	0.812881		ALDEx2_t
0 mg/mL - 2.50 mg/mL	p__Firmicutes|c__Clostridia|o__Clostridiales|f__Ruminococcaceae|g__Ruminococcus|s__Ruminococcus champanellensis	-3.33505	5.03476	-0.611247	0.263672	0.11837	0.58708	0.118176	0.586467	0.586467		ALDEx2_t
0 mg/mL - 2.50 mg/mL	p__Firmicutes|c__Clostridia|o__Clostridiales|f__Christensenellaceae|g__Christensenella|s__Christensenella massiliensis	0.285857	2.58577	0.0834717	0.463938	0.749071	0.913814	0.777623	0.94784	0.94784		ALDEx2_t
0 mg/mL - 2.50 mg/mL	p__Firmicutes|c__Clostridia|o__Clostridiales|f__Lachnospiraceae|g__Butyrivibrio|s__Butyrivibrio crossotus	0.416831	1.81306	0.231569	0.408203	0.392518	0.783725	0.568083	0.879742	0.879742		ALDEx2_t
0 mg/mL - 2.50 mg/mL	p__Firmicutes|c__Clostridia|o__Clostridiales|f__Hungateiclostridiaceae|g__Pseudoclostridium|s__Pseudoclostridium thermosuccinogenes	-0.732181	2.85272	-0.203758	0.390625	0.477639	0.819824	0.449482	0.841025	0.841025		ALDEx2_t
0 mg/mL - 2.50 mg/mL	p__Firmicutes|c__Clostridia|o__Clostridiales|f__Hungateiclostridiaceae|g__Hungateiclostridium|s__Hungateiclostridium aldrichii	0.0942807	2.69784	0.0211087	0.478516	0.625563	0.875956	0.716668	0.932695	0.932695		ALDEx2_t
0 mg/mL - 2.50 mg/mL	p__Firmicutes|c__Clostridia|o__Clostridiales|f__Lachnospiraceae|g__Anaerocolumna|s__Anaerocolumna cellulosilytica	-0.571423	2.93336	-0.139983	0.40625	0.485127	0.819845	0.512843	0.86814	0.86814		ALDEx2_t
0 mg/mL - 2.50 mg/mL	p__Firmicutes|c__Clostridia|o__Clostridiales|f__Lachnospiraceae|g__Lacrimispora|s__Lacrimispora indolis	0.178194	2.42214	0.0567751	0.452242	0.66064	0.883177	0.722744	0.92936	0.92936		ALDEx2_t
0 mg/mL - 2.50 mg/mL	p__Firmicutes|c__Clostridia|o__Clostridiales|f__Lachnospiraceae|g__Eisenbergiella|s__Eisenbergiella tayi	-0.544169	2.74874	-0.147182	0.417154	0.496999	0.832021	0.587754	0.893113	0.893113		ALDEx2_t
0 mg/mL - 2.50 mg/mL	p__Firmicutes|c__Clostridia|o__Clostridiales|f__Peptostreptococcaceae|g__Romboutsia|s__Romboutsia ilealis	3.51465	4.86875	0.68919	0.191033	0.0760554	0.499968	0.0514272	0.445063	0.445063		ALDEx2_t
0 mg/mL - 2.50 mg/mL	p__Firmicutes|c__Clostridia|o__Clostridiales|f__Oscillospiraceae|g__Oscillibacter|s__Oscillibacter sp. PEA192	0.444977	2.296	0.145976	0.427734	0.563656	0.847545	0.62686	0.901764	0.901764		ALDEx2_t
0 mg/mL - 2.50 mg/mL	p__Bacteroidetes|c__Bacteroidia|o__Bacteroidales|f__Rikenellaceae|g__Alistipes|s__Alistipes senegalensis	2.33702	5.47816	0.40795	0.31384	0.269778	0.705568	0.312223	0.725748	0.725748		ALDEx2_t
0 mg/mL - 2.50 mg/mL	p__Firmicutes|c__Clostridia|o__Clostridiales|f__Ruminococcaceae|g__Acetivibrio|s__Acetivibrio ethanolgignens	0.136776	2.06938	0.0547994	0.467836	0.609868	0.868764	0.644466	0.91102	0.91102		ALDEx2_t
0 mg/mL - 2.50 mg/mL	p__Firmicutes|c__Clostridia|o__Clostridiales|f__Lachnospiraceae|g__Robinsoniella|s__Robinsoniella peoriensis	-0.733738	2.09467	-0.308609	0.349609	0.269585	0.726347	0.334762	0.762651	0.762651		ALDEx2_t
0 mg/mL - 2.50 mg/mL	p__Firmicutes|c__Clostridia|o__Clostridiales|f__Lachnospiraceae|g__Faecalicatena|s__Faecalicatena orotica	-0.135437	2.27631	-0.050674	0.477583	0.640311	0.876357	0.697484	0.923437	0.923437		ALDEx2_t
0 mg/mL - 2.50 mg/mL	p__Firmicutes|c__Clostridia|o__Clostridiales|f__Hungateiclostridiaceae|g__Hungateiclostridium|s__Hungateiclostridium saccincola	0.0220568	3.07791	0.00815001	0.493177	0.649636	0.883998	0.742933	0.938531	0.938531		ALDEx2_t
0 mg/mL - 2.50 mg/mL	p__Firmicutes|c__Clostridia|o__Clostridiales|f__Lachnospiraceae|g__|s__Lachnospiraceae bacterium Choco86	-1.0624	3.45617	-0.24546	0.385965	0.289114	0.744609	0.459804	0.853372	0.853372		ALDEx2_t
0 mg/mL - 2.50 mg/mL	p__Firmicutes|c__Clostridia|o__Clostridiales|f__Ruminococcaceae|g__Pseudoflavonifractor|s__Pseudoflavonifractor phocaeensis	1.25273	2.5222	0.44572	0.272905	0.163887	0.630825	0.158657	0.60866	0.60866		ALDEx2_t
0 mg/mL - 2.50 mg/mL	p__Firmicutes|c__Clostridia|o__Clostridiales|f__Clostridiaceae|g__Geosporobacter|s__Geosporobacter ferrireducens	-0.967761	3.63423	-0.190336	0.408203	0.515336	0.834296	0.538783	0.8808	0.8808		ALDEx2_t
0 mg/mL - 2.50 mg/mL	p__Candidatus Melainabacteria|c__|o__Vampirovibrionales|f__|g__Vampirovibrio|s__Vampirovibrio chlorellavorus	1.36671	5.38242	0.236211	0.384766	0.382455	0.763078	0.455771	0.807758	0.807758		ALDEx2_t
0 mg/mL - 2.50 mg/mL	p__Firmicutes|c__Clostridia|o__Clostridiales|f__Lachnospiraceae|g__Lachnoclostridium|s__[Clostridium] polysaccharolyticum	0.212697	2.35334	0.0612373	0.457031	0.642149	0.880859	0.677448	0.917114	0.917114		ALDEx2_t
0 mg/mL - 2.50 mg/mL	p__Firmicutes|c__Clostridia|o__Clostridiales|f__Catabacteriaceae|g__Catabacter|s__Catabacter hongkongensis	0.780249	3.75579	0.185415	0.405458	0.585499	0.857201	0.575502	0.893595	0.893595		ALDEx2_t
0 mg/mL - 2.50 mg/mL	p__Firmicutes|c__Clostridia|o__Clostridiales|f__Lachnospiraceae|g__Mediterraneibacter|s__[Ruminococcus] gnavus	-0.470275	2.35894	-0.153941	0.40625	0.483332	0.819998	0.498508	0.852048	0.852048		ALDEx2_t
0 mg/mL - 2.50 mg/mL	p__Firmicutes|c__Clostridia|o__Clostridiales|f__Lachnospiraceae|g__Roseburia|s__Roseburia intestinalis	-0.230308	2.42124	-0.0657586	0.455078	0.609747	0.865918	0.681284	0.913208	0.913208		ALDEx2_t
0 mg/mL - 2.50 mg/mL	p__Bacteroidetes|c__Bacteroidia|o__Bacteroidales|f__Rikenellaceae|g__Alistipes|s__Alistipes finegoldii	1.24166	5.2348	0.212822	0.404297	0.3637	0.759126	0.480774	0.835894	0.835894		ALDEx2_t
0 mg/mL - 2.50 mg/mL	p__Firmicutes|c__Clostridia|o__Clostridiales|f__Ruminococcaceae|g__Pseudoflavonifractor|s__Pseudoflavonifractor capillosus	0.606819	3.1325	0.157592	0.404297	0.573854	0.854753	0.569248	0.882225	0.882225		ALDEx2_t
0 mg/mL - 2.50 mg/mL	p__Firmicutes|c__Clostridia|o__Clostridiales|f__Lachnospiraceae|g__Anaerostipes|s__Anaerostipes hadrus	0.803661	3.21747	0.196847	0.39961	0.43604	0.802101	0.500118	0.8526	0.8526		ALDEx2_t
0 mg/mL - 2.50 mg/mL	p__Firmicutes|c__Clostridia|o__Clostridiales|f__Lachnospiraceae|g__Blautia|s__Blautia sp. SC05B48	0.196788	2.41555	0.0601141	0.45809	0.566234	0.85104	0.667793	0.917109	0.917109		ALDEx2_t
0 mg/mL - 2.50 mg/mL	p__Firmicutes|c__Clostridia|o__Clostridiales|f__Ruminococcaceae|g__Paludicola|s__Paludicola psychrotolerans	2.6512	3.55574	0.673182	0.206628	0.0778619	0.535692	0.0753358	0.511724	0.511724		ALDEx2_t
0 mg/mL - 2.50 mg/mL	p__Firmicutes|c__Clostridia|o__Clostridiales|f__|g__Intestinimonas|s__Intestinimonas butyriciproducens	0.900501	2.98348	0.257058	0.368421	0.295339	0.735974	0.406502	0.821065	0.821065		ALDEx2_t
0 mg/mL - 2.50 mg/mL	p__Firmicutes|c__Bacilli|o__Lactobacillales|f__Lactobacillaceae|g__Lactobacillus|s__Lactobacillus rogosae	-0.88271	4.78931	-0.153415	0.417969	0.545288	0.834718	0.58133	0.878433	0.878433		ALDEx2_t
0 mg/mL - 2.50 mg/mL	p__Firmicutes|c__Clostridia|o__Clostridiales|f__Clostridiaceae|g__Clostridium|s__Clostridium sp. SY8519	0.771292	3.58571	0.180756	0.387914	0.404682	0.783738	0.459942	0.841573	0.841573		ALDEx2_t
0 mg/mL - 2.50 mg/mL	p__Firmicutes|c__Clostridia|o__Clostridiales|f__Lachnospiraceae|g__Lacrimispora|s__Lacrimispora amygdalina	0.655033	2.81508	0.218522	0.382066	0.415629	0.782094	0.441029	0.819471	0.819471		ALDEx2_t
0 mg/mL - 2.50 mg/mL	p__Firmicutes|c__Clostridia|o__Clostridiales|f__Lachnospiraceae|g__Lacrimispora|s__Lacrimispora celerecrescens	1.25374	2.90237	0.392614	0.296296	0.208084	0.670599	0.177906	0.665561	0.665561		ALDEx2_t
0 mg/mL - 2.50 mg/mL	p__Firmicutes|c__Bacilli|o__Lactobacillales|f__Lactobacillaceae|g__Lactobacillus|s__Lactobacillus animalis	2.82133	5.01082	0.494276	0.283203	0.233613	0.651782	0.227225	0.656334	0.656334		ALDEx2_t
0 mg/mL - 2.50 mg/mL	p__Firmicutes|c__Clostridia|o__Clostridiales|f__Hungateiclostridiaceae|g__Hungateiclostridium|s__Hungateiclostridium cellulolyticum	-0.147983	4.52516	-0.0300588	0.481481	0.629101	0.873594	0.703977	0.92651	0.92651		ALDEx2_t
0 mg/mL - 2.50 mg/mL	p__Firmicutes|c__Clostridia|o__Clostridiales|f__Lachnospiraceae|g__Lachnoclostridium|s__[Clostridium] populeti	-0.0838861	2.98242	-0.0260632	0.477583	0.604599	0.866347	0.666285	0.923063	0.923063		ALDEx2_t
0 mg/mL - 2.50 mg/mL	p__Firmicutes|c__Clostridia|o__Clostridiales|f__Lachnospiraceae|g__Parasporobacterium|s__Parasporobacterium paucivorans	1.45593	3.83633	0.301191	0.333333	0.402268	0.768676	0.250246	0.720187	0.720187		ALDEx2_t
0 mg/mL - 2.50 mg/mL	p__Firmicutes|c__Clostridia|o__Clostridiales|f__Ruminococcaceae|g__Ruminococcus|s__Ruminococcus bicirculans	-2.40468	4.02523	-0.540594	0.226563	0.164294	0.643615	0.114358	0.608909	0.608909		ALDEx2_t
0 mg/mL - 2.50 mg/mL	p__Firmicutes|c__Clostridia|o__Clostridiales|f__Hungateiclostridiaceae|g__Anaerobacterium|s__Anaerobacterium chartisolvens	-1.29868	3.03304	-0.362007	0.320313	0.309219	0.731561	0.288099	0.728208	0.728208		ALDEx2_t
0 mg/mL - 2.50 mg/mL	p__Firmicutes|c__Clostridia|o__Clostridiales|f__Clostridiaceae|g__Clostridium|s__Clostridium tarantellae	-2.15115	4.41572	-0.426584	0.304094	0.261448	0.718634	0.239647	0.714349	0.714349		ALDEx2_t
0 mg/mL - 2.50 mg/mL	p__Bacteroidetes|c__Bacteroidia|o__Bacteroidales|f__Rikenellaceae|g__Alistipes|s__Alistipes communis	1.13377	5.43444	0.180022	0.419922	0.408028	0.77715	0.48349	0.823836	0.823836		ALDEx2_t
0 mg/mL - 2.50 mg/mL	p__Firmicutes|c__Clostridia|o__Clostridiales|f__Clostridiaceae|g__Clostridium|s__Clostridium botulinum	-1.26025	3.94594	-0.280162	0.350877	0.329489	0.752649	0.328809	0.780547	0.780547		ALDEx2_t
0 mg/mL - 2.50 mg/mL	p__Bacteroidetes|c__Bacteroidia|o__Bacteroidales|f__Rikenellaceae|g__Alistipes|s__Alistipes dispar	2.42904	5.04612	0.396402	0.326172	0.294473	0.710651	0.331901	0.739617	0.739617		ALDEx2_t
0 mg/mL - 2.50 mg/mL	p__Firmicutes|c__Clostridia|o__Clostridiales|f__Lachnospiraceae|g__Anaerostipes|s__Anaerostipes rhamnosivorans	-1.14359	3.15272	-0.28866	0.34375	0.341218	0.755367	0.350115	0.783451	0.783451		ALDEx2_t
0 mg/mL - 2.50 mg/mL	p__Firmicutes|c__Clostridia|o__Clostridiales|f__Ruminococcaceae|g__Acutalibacter|s__Acutalibacter muris	-0.110373	3.351	-0.0305205	0.487329	0.594068	0.855239	0.636873	0.89693	0.89693		ALDEx2_t
0 mg/mL - 2.50 mg/mL	p__Firmicutes|c__Clostridia|o__Clostridiales|f__Ruminococcaceae|g__Hydrogenoanaerobacterium|s__Hydrogenoanaerobacterium saccharovorans	0.741646	3.85914	0.142657	0.412109	0.470653	0.807441	0.527943	0.860401	0.860401		ALDEx2_t
0 mg/mL - 2.50 mg/mL	p__Firmicutes|c__Clostridia|o__Clostridiales|f__Lachnospiraceae|g__Anaerotignum|s__Anaerotignum lactatifermentans	0.125812	3.32629	0.0265261	0.476563	0.633547	0.870895	0.687225	0.916792	0.916792		ALDEx2_t
0 mg/mL - 2.50 mg/mL	p__Firmicutes|c__Clostridia|o__Clostridiales|f__|g__Colidextribacter|s__Colidextribacter massiliensis	0.484765	3.64957	0.117451	0.431641	0.547979	0.84676	0.59038	0.891423	0.891423		ALDEx2_t
0 mg/mL - 2.50 mg/mL	p__Firmicutes|c__Clostridia|o__Clostridiales|f__Clostridiaceae|g__Falcatimonas|s__Falcatimonas natans	0.84777	4.17019	0.164355	0.398438	0.49397	0.811482	0.51866	0.84816	0.84816		ALDEx2_t
0 mg/mL - 2.50 mg/mL	p__Firmicutes|c__Clostridia|o__Clostridiales|f__Eubacteriaceae|g__Eubacterium|s__Eubacterium oxidoreducens	-0.72226	3.43341	-0.184047	0.384016	0.502339	0.82804	0.515542	0.858965	0.858965		ALDEx2_t
0 mg/mL - 2.50 mg/mL	p__Firmicutes|c__Clostridia|o__Clostridiales|f__Lachnospiraceae|g__Lacrimispora|s__Lacrimispora algidixylanolytica	-0.975208	3.76022	-0.238371	0.375	0.425775	0.78512	0.427316	0.809609	0.809609		ALDEx2_t
0 mg/mL - 2.50 mg/mL	p__Firmicutes|c__Clostridia|o__Clostridiales|f__Lachnospiraceae|g__Schaedlerella|s__Schaedlerella arabinosiphila	0.869394	3.10105	0.250539	0.367188	0.388157	0.771332	0.433974	0.818567	0.818567		ALDEx2_t
0 mg/mL - 2.50 mg/mL	p__Bacteroidetes|c__Bacteroidia|o__Bacteroidales|f__Rikenellaceae|g__Alistipes|s__Alistipes onderdonkii	1.48212	5.43716	0.250999	0.385965	0.407317	0.765033	0.464361	0.802587	0.802587		ALDEx2_t
0 mg/mL - 2.50 mg/mL	p__Firmicutes|c__Clostridia|o__Clostridiales|f__Ruminococcaceae|g__|s__[Clostridium] methylpentosum	0.915073	3.32138	0.222399	0.361328	0.48001	0.805842	0.441385	0.818988	0.818988		ALDEx2_t
0 mg/mL - 2.50 mg/mL	p__Firmicutes|c__Clostridia|o__Clostridiales|f__Clostridiaceae|g__Clostridium|s__Clostridium disporicum	0.936337	4.12325	0.205559	0.408203	0.44603	0.798175	0.490225	0.846279	0.846279		ALDEx2_t
0 mg/mL - 2.50 mg/mL	p__Firmicutes|c__Clostridia|o__Clostridiales|f__Lachnospiraceae|g__Anaerostipes|s__Anaerostipes butyraticus	-0.804033	3.3677	-0.190789	0.401559	0.503215	0.8257	0.477217	0.845115	0.845115		ALDEx2_t
0 mg/mL - 2.50 mg/mL	p__Firmicutes|c__Clostridia|o__Clostridiales|f__Ruminococcaceae|g__Negativibacillus|s__Negativibacillus massiliensis	1.36316	3.40123	0.355651	0.302144	0.267866	0.696927	0.256422	0.715495	0.715495		ALDEx2_t
0 mg/mL - 2.50 mg/mL	p__Firmicutes|c__Clostridia|o__Clostridiales|f__Hungateiclostridiaceae|g__Ruminiclostridium|s__Ruminiclostridium cellulolyticum	-0.616566	3.6566	-0.139455	0.427734	0.470762	0.807598	0.538666	0.863153	0.863153		ALDEx2_t
0 mg/mL - 2.50 mg/mL	p__Firmicutes|c__Clostridia|o__Clostridiales|f__Lachnospiraceae|g__Lachnoclostridium|s__Lachnoclostridium pacaense	-1.63897	3.30097	-0.410495	0.288499	0.238845	0.679269	0.21428	0.664663	0.664663		ALDEx2_t
0 mg/mL - 2.50 mg/mL	p__Firmicutes|c__Clostridia|o__Clostridiales|f__Lachnospiraceae|g__Faecalicatena|s__Faecalicatena contorta	0.72594	3.01169	0.197819	0.389864	0.545132	0.831658	0.511795	0.837692	0.837692		ALDEx2_t
0 mg/mL - 2.50 mg/mL	p__Bacteroidetes|c__Bacteroidia|o__Bacteroidales|f__Rikenellaceae|g__Alistipes|s__Alistipes putredinis	1.13135	5.47085	0.172224	0.402344	0.464664	0.803794	0.520469	0.842299	0.842299		ALDEx2_t
0 mg/mL - 2.50 mg/mL	p__Firmicutes|c__Clostridia|o__Clostridiales|f__Clostridiaceae|g__Clostridium|s__Clostridium saudiense	0.800574	4.39612	0.144412	0.438597	0.514927	0.824517	0.564734	0.879743	0.879743		ALDEx2_t
0 mg/mL - 2.50 mg/mL	p__Firmicutes|c__Clostridia|o__Clostridiales|f__Ruminococcaceae|g__Anaeromassilibacillus|s__Anaeromassilibacillus senegalensis	0.360639	3.83741	0.0812088	0.462891	0.572482	0.850868	0.626913	0.897293	0.897293		ALDEx2_t
0 mg/mL - 2.50 mg/mL	p__Verrucomicrobia|c__Verrucomicrobiae|o__Verrucomicrobiales|f__Akkermansiaceae|g__Akkermansia|s__Akkermansia muciniphila	1.39682	4.90721	0.256449	0.39961	0.465014	0.80135	0.476119	0.833545	0.833545		ALDEx2_t
0 mg/mL - 2.50 mg/mL	p__Firmicutes|c__Clostridia|o__Clostridiales|f__Lachnospiraceae|g__Anaerocolumna|s__Anaerocolumna xylanovorans	-0.366179	4.24687	-0.0794256	0.45614	0.556429	0.84635	0.621366	0.901455	0.901455		ALDEx2_t
0 mg/mL - 2.50 mg/mL	p__Firmicutes|c__Clostridia|o__Clostridiales|f__Lachnospiraceae|g__Faecalicatena|s__Faecalicatena fissicatena	-1.50609	3.34358	-0.412215	0.294347	0.285125	0.707929	0.231927	0.666104	0.666104		ALDEx2_t
0 mg/mL - 2.50 mg/mL	p__Firmicutes|c__Clostridia|o__Clostridiales|f__Peptococcaceae|g__Dehalobacterium|s__Dehalobacterium formicoaceticum	-0.783665	4.44664	-0.143177	0.427734	0.500233	0.824612	0.543108	0.872552	0.872552		ALDEx2_t
0 mg/mL - 2.50 mg/mL	p__Firmicutes|c__Erysipelotrichia|o__Erysipelotrichales|f__Erysipelotrichaceae|g__Breznakia|s__Breznakia pachnodae	0.535767	4.0208	0.107299	0.431641	0.577545	0.84623	0.609148	0.889137	0.889137		ALDEx2_t
0 mg/mL - 2.50 mg/mL	p__Firmicutes|c__Clostridia|o__Clostridiales|f__Hungateiclostridiaceae|g__Hungateiclostridium|s__Hungateiclostridium straminisolvens	-1.31719	3.82727	-0.304406	0.330078	0.364453	0.757805	0.330461	0.754524	0.754524		ALDEx2_t
0 mg/mL - 2.50 mg/mL	p__Firmicutes|c__Clostridia|o__Clostridiales|f__Hungateiclostridiaceae|g__Hungateiclostridium|s__Hungateiclostridium thermocellum	-1.53795	3.85633	-0.330458	0.337232	0.37942	0.760795	0.366182	0.767219	0.767219		ALDEx2_t
0 mg/mL - 2.50 mg/mL	p__Firmicutes|c__Clostridia|o__Clostridiales|f__Lachnospiraceae|g__Anaerobutyricum|s__Anaerobutyricum hallii	0.0361343	3.80466	0.0108563	0.489279	0.579218	0.848876	0.637425	0.896851	0.896851		ALDEx2_t
0 mg/mL - 2.50 mg/mL	p__Firmicutes|c__Clostridia|o__Clostridiales|f__Hungateiclostridiaceae|g__Ruminiclostridium|s__Ruminiclostridium cellobioparum	0.207325	3.58122	0.0420126	0.461988	0.572212	0.855951	0.581938	0.885516	0.885516		ALDEx2_t
0 mg/mL - 2.50 mg/mL	p__Firmicutes|c__Clostridia|o__Clostridiales|f__Lachnospiraceae|g__|s__Lachnospiraceae bacterium oral taxon 500	-2.12741	3.73857	-0.487856	0.259259	0.17125	0.6341	0.143163	0.584173	0.584173		ALDEx2_t
0 mg/mL - 2.50 mg/mL	p__Firmicutes|c__Clostridia|o__Clostridiales|f__Christensenellaceae|g__Christensenella|s__Christensenella timonensis	-1.63055	4.24067	-0.36139	0.322266	0.363362	0.748474	0.315272	0.732253	0.732253		ALDEx2_t
0 mg/mL - 2.50 mg/mL	p__Firmicutes|c__Clostridia|o__Clostridiales|f__Lachnospiraceae|g__Lachnoclostridium|s__[Clostridium] scindens	1.14184	3.85172	0.246763	0.361328	0.424862	0.777237	0.411984	0.794705	0.794705		ALDEx2_t
0 mg/mL - 2.50 mg/mL	p__Firmicutes|c__Clostridia|o__Clostridiales|f__Lachnospiraceae|g__Roseburia|s__Roseburia hominis	-0.982706	3.83256	-0.244063	0.390625	0.497874	0.81826	0.451685	0.820841	0.820841		ALDEx2_t
0 mg/mL - 2.50 mg/mL	p__Bacteroidetes|c__Bacteroidia|o__Bacteroidales|f__Rikenellaceae|g__Alistipes|s__Alistipes megaguti	0.936318	4.8426	0.166694	0.414063	0.402867	0.768194	0.457026	0.811483	0.811483		ALDEx2_t
0 mg/mL - 2.50 mg/mL	p__Firmicutes|c__Clostridia|o__Clostridiales|f__Peptococcaceae|g__|s__Peptococcaceae bacterium DCMF	-1.28662	4.5557	-0.211252	0.391813	0.443295	0.801671	0.447498	0.821623	0.821623		ALDEx2_t
0 mg/mL - 2.50 mg/mL	p__Firmicutes|c__Clostridia|o__Clostridiales|f__|g__Ihubacter|s__Ihubacter massiliensis	0.508937	3.5312	0.114407	0.42885	0.485619	0.814622	0.581863	0.890369	0.890369		ALDEx2_t
0 mg/mL - 2.50 mg/mL	p__Firmicutes|c__Clostridia|o__Clostridiales|f__Lachnospiraceae|g__Anaerotignum|s__Anaerotignum aminivorans	0.766858	4.04618	0.172812	0.389864	0.466648	0.790739	0.482418	0.818462	0.818462		ALDEx2_t
0 mg/mL - 2.50 mg/mL	p__Firmicutes|c__Erysipelotrichia|o__Erysipelotrichales|f__Erysipelotrichaceae|g__Faecalitalea|s__Faecalitalea cylindroides	-0.818023	4.39573	-0.179776	0.417154	0.530566	0.831182	0.531727	0.85295	0.85295		ALDEx2_t
0 mg/mL - 2.50 mg/mL	p__Firmicutes|c__Clostridia|o__Clostridiales|f__Clostridiaceae|g__Clostridium|s__Clostridium sp. JN-9	-2.27309	4.06551	-0.512722	0.263672	0.205705	0.654034	0.170676	0.610999	0.610999		ALDEx2_t
0 mg/mL - 2.50 mg/mL	p__Firmicutes|c__Clostridia|o__Clostridiales|f__Lachnospiraceae|g__Marvinbryantia|s__Marvinbryantia formatexigens	1.04829	3.56433	0.247025	0.364522	0.426231	0.774624	0.404901	0.795171	0.795171		ALDEx2_t
0 mg/mL - 2.50 mg/mL	p__Tenericutes|c__Mollicutes|o__Entomoplasmatales|f__Spiroplasmataceae|g__Spiroplasma|s__Spiroplasma chrysopicola	-0.711979	4.44508	-0.159826	0.426901	0.537048	0.838253	0.572137	0.885985	0.885985		ALDEx2_t
0 mg/mL - 2.50 mg/mL	p__Tenericutes|c__Mollicutes|o__Entomoplasmatales|f__Spiroplasmataceae|g__Spiroplasma|s__Spiroplasma lampyridicola	-1.09775	4.3665	-0.217738	0.400391	0.469934	0.808226	0.485554	0.824841	0.824841		ALDEx2_t
0 mg/mL - 2.50 mg/mL	p__Firmicutes|c__Clostridia|o__Clostridiales|f__Lachnospiraceae|g__Bariatricus|s__Bariatricus massiliensis	-1.03612	3.84279	-0.203957	0.395712	0.517756	0.825576	0.49016	0.842788	0.842788		ALDEx2_t
0 mg/mL - 2.50 mg/mL	p__Firmicutes|c__Clostridia|o__Clostridiales|f__Hungateiclostridiaceae|g__|s__Hungateiclostridiaceae bacterium KB18	-0.217384	4.45466	-0.0429429	0.471735	0.55219	0.844788	0.576468	0.881564	0.881564		ALDEx2_t
0 mg/mL - 2.50 mg/mL	p__Firmicutes|c__Erysipelotrichia|o__Erysipelotrichales|f__Erysipelotrichaceae|g__Turicibacter|s__Turicibacter sp. H121	-0.439399	4.63528	-0.0907713	0.441406	0.538677	0.834024	0.559663	0.875074	0.875074		ALDEx2_t
0 mg/mL - 2.50 mg/mL	p__Firmicutes|c__Clostridia|o__Clostridiales|f__Ruminococcaceae|g__Harryflintia|s__Harryflintia acetispora	0.239797	4.52513	0.0530962	0.466797	0.525833	0.831495	0.583212	0.878148	0.878148		ALDEx2_t
0 mg/mL - 2.50 mg/mL	p__Firmicutes|c__Clostridia|o__Clostridiales|f__Ruminococcaceae|g__|s__[Clostridium] viride	1.13157	3.64581	0.294259	0.339181	0.336781	0.72466	0.364201	0.762621	0.762621		ALDEx2_t
0 mg/mL - 2.50 mg/mL	p__Firmicutes|c__Clostridia|o__Clostridiales|f__Clostridiaceae|g__Hungatella|s__Hungatella xylanolytica	-0.697217	4.29234	-0.134553	0.421875	0.490188	0.821227	0.520659	0.855412	0.855412		ALDEx2_t
0 mg/mL - 2.50 mg/mL	p__Firmicutes|c__Clostridia|o__Clostridiales|f__|g__Massilistercora|s__Massilistercora timonensis	-0.190011	3.76183	-0.0448895	0.480469	0.529759	0.834975	0.577487	0.880373	0.880373		ALDEx2_t
0 mg/mL - 2.50 mg/mL	p__Firmicutes|c__Clostridia|o__Clostridiales|f__Hungateiclostridiaceae|g__Hungateiclostridium|s__Hungateiclostridium clariflavum	-0.749236	3.90722	-0.166375	0.411306	0.503614	0.825362	0.537421	0.859942	0.859942		ALDEx2_t
0 mg/mL - 2.50 mg/mL	p__Firmicutes|c__Clostridia|o__Clostridiales|f__Peptostreptococcaceae|g__Clostridioides|s__Clostridioides difficile	-1.88655	3.87016	-0.453276	0.28125	0.228698	0.654779	0.201976	0.643636	0.643636		ALDEx2_t
0 mg/mL - 2.50 mg/mL	p__Firmicutes|c__Clostridia|o__Clostridiales|f__Ruminococcaceae|g__Faecalibacterium|s__Faecalibacterium prausnitzii	-1.59431	3.60109	-0.384861	0.292969	0.322775	0.721872	0.275897	0.695043	0.695043		ALDEx2_t
0 mg/mL - 2.50 mg/mL	p__Firmicutes|c__Clostridia|o__Clostridiales|f__Lachnospiraceae|g__Blautia|s__Blautia sp. N6H1-15	0.0616938	4.27908	0.0139265	0.488281	0.549867	0.84272	0.603055	0.883771	0.883771		ALDEx2_t
0 mg/mL - 2.50 mg/mL	p__Firmicutes|c__Clostridia|o__Clostridiales|f__Ruminococcaceae|g__Papillibacter|s__Papillibacter cinnamivorans	-0.764777	3.61853	-0.165959	0.39961	0.478218	0.807878	0.423188	0.797392	0.797392		ALDEx2_t
0 mg/mL - 2.50 mg/mL	p__Firmicutes|c__Clostridia|o__Clostridiales|f__|g__|s__Clostridiales bacterium CCNA10	0.0495518	4.01369	0.00907226	0.498047	0.533891	0.838103	0.576631	0.876892	0.876892		ALDEx2_t
0 mg/mL - 2.50 mg/mL	p__Firmicutes|c__Clostridia|o__Clostridiales|f__Ruminococcaceae|g__Caproiciproducens|s__Caproiciproducens galactitolivorans	-0.235102	4.25337	-0.0469874	0.476563	0.516839	0.826742	0.552258	0.866203	0.866203		ALDEx2_t
0 mg/mL - 2.50 mg/mL	p__Firmicutes|c__Clostridia|o__Clostridiales|f__Clostridiaceae|g__Clostridium|s__Clostridium beijerinckii	-1.31613	4.144	-0.270849	0.348928	0.426298	0.767922	0.401856	0.777963	0.777963		ALDEx2_t
0 mg/mL - 2.50 mg/mL	p__Firmicutes|c__Clostridia|o__Clostridiales|f__Clostridiaceae|g__Clostridium|s__Clostridium merdae	0.591705	4.68565	0.100054	0.457031	0.52875	0.825307	0.577432	0.856356	0.856356		ALDEx2_t
0 mg/mL - 2.50 mg/mL	p__Firmicutes|c__Clostridia|o__Clostridiales|f__|g__Monoglobus|s__Monoglobus pectinilyticus	-0.153928	4.29049	-0.0358676	0.489279	0.564328	0.848718	0.592729	0.879759	0.879759		ALDEx2_t
0 mg/mL - 2.50 mg/mL	p__Firmicutes|c__Clostridia|o__Clostridiales|f__Peptostreptococcaceae|g__Romboutsia|s__Romboutsia timonensis	0.888607	4.47626	0.177299	0.40625	0.475338	0.806598	0.483575	0.828684	0.828684		ALDEx2_t
0 mg/mL - 2.50 mg/mL	p__Firmicutes|c__Clostridia|o__Clostridiales|f__Clostridiaceae|g__Butyricicoccus|s__Butyricicoccus pullicaecorum	-1.28919	4.31993	-0.287153	0.34308	0.40707	0.760351	0.374552	0.758707	0.758707		ALDEx2_t
0 mg/mL - 2.50 mg/mL	p__Firmicutes|c__Clostridia|o__Clostridiales|f__Clostridiaceae|g__Clostridium|s__Clostridium ventriculi	-1.21947	4.13615	-0.264493	0.37037	0.417427	0.768324	0.410774	0.779698	0.779698		ALDEx2_t
0 mg/mL - 2.50 mg/mL	p__Firmicutes|c__Clostridia|o__Clostridiales|f__Ruminococcaceae|g__Tepidibaculum|s__Tepidibaculum saccharolyticum	-0.386508	4.24253	-0.0653028	0.455078	0.471609	0.811602	0.506535	0.854598	0.854598		ALDEx2_t
0 mg/mL - 2.50 mg/mL	p__Tenericutes|c__Mollicutes|o__Entomoplasmatales|f__Spiroplasmataceae|g__Spiroplasma|s__Spiroplasma syrphidicola	-0.04885	4.15438	-0.0063532	0.492188	0.516465	0.834261	0.568843	0.88088	0.88088		ALDEx2_t
0 mg/mL - 2.50 mg/mL	p__Firmicutes|c__Clostridia|o__Clostridiales|f__Clostridiaceae|g__Clostridium|s__Clostridium subterminale	-0.267087	4.27407	-0.0526974	0.464844	0.534299	0.831444	0.570252	0.867687	0.867687		ALDEx2_t
0 mg/mL - 6.60 mg/mL	p__Firmicutes|c__Clostridia|o__Clostridiales|f__Eubacteriaceae|g__Eubacterium|s__Eubacterium ventriosum	-2.19048	2.04226	-0.993497	0.125	0.00147127	0.0427511	0.00149187	0.0302459	0.0302459	*	ALDEx2_t
0 mg/mL - 6.60 mg/mL	p__Firmicutes|c__Clostridia|o__Clostridiales|f__Ruminococcaceae|g__Anaerotruncus|s__Anaerotruncus rubiinfantis	1.80793	1.96855	0.811068	0.142046	0.0668365	0.229303	0.00322819	0.0448664	0.0448664	*	ALDEx2_t
0 mg/mL - 6.60 mg/mL	p__Firmicutes|c__Clostridia|o__Clostridiales|f__Lachnospiraceae|g__Lachnospira|s__Lachnospira eligens	-3.35164	3.19668	-0.968253	0.0937502	0.00131282	0.0351421	0.000750897	0.0163345	0.0163345	*	ALDEx2_t
0 mg/mL - 6.60 mg/mL	p__Firmicutes|c__Clostridia|o__Clostridiales|f__Lachnospiraceae|g__|s__Lachnospiraceae bacterium GAM79	-1.47817	2.10184	-0.660012	0.184659	0.0422059	0.206463	0.00628242	0.0693378	0.0693378		ALDEx2_t
0 mg/mL - 6.60 mg/mL	p__Firmicutes|c__Clostridia|o__Clostridiales|f__Lachnospiraceae|g__Lacrimispora|s__Lacrimispora saccharolytica	-1.20062	1.87759	-0.600181	0.256738	0.078743	0.270707	0.0442243	0.181048	0.181048		ALDEx2_t
0 mg/mL - 6.60 mg/mL	p__Firmicutes|c__Clostridia|o__Clostridiales|f__Lachnospiraceae|g__Eisenbergiella|s__Eisenbergiella massiliensis	-0.413383	0.951973	-0.284226	0.3125	0.782914	0.882737	0.172118	0.369062	0.369062		ALDEx2_t
0 mg/mL - 6.60 mg/mL	p__Firmicutes|c__Clostridia|o__Clostridiales|f__Oscillospiraceae|g__Dysosmobacter|s__Dysosmobacter welbionis	0.719202	1.78376	0.381614	0.330966	0.143624	0.366548	0.14711	0.346597	0.346597		ALDEx2_t
0 mg/mL - 6.60 mg/mL	p__Bacteroidetes|c__Bacteroidia|o__Bacteroidales|f__Muribaculaceae|g__Muribaculum|s__Muribaculum intestinale	3.10473	4.12607	0.618843	0.246809	0.0222675	0.166362	0.0253374	0.138796	0.138796		ALDEx2_t
0 mg/mL - 6.60 mg/mL	p__Firmicutes|c__Clostridia|o__Clostridiales|f__|g__Flintibacter|s__Flintibacter sp. KGMB00164	0.96514	1.58033	0.491255	0.252482	0.0640934	0.25024	0.0441055	0.175766	0.175766		ALDEx2_t
0 mg/mL - 6.60 mg/mL	p__Firmicutes|c__Clostridia|o__Clostridiales|f__Lachnospiraceae|g__Anaerotaenia|s__Anaerotaenia torta	0.778463	1.58094	0.464118	0.312057	0.0755134	0.267694	0.103737	0.275481	0.275481		ALDEx2_t
0 mg/mL - 6.60 mg/mL	p__Firmicutes|c__Clostridia|o__Clostridiales|f__Oscillospiraceae|g__Oscillibacter|s__Oscillibacter valericigenes	0.895632	2.08579	0.351062	0.320567	0.111194	0.32031	0.14591	0.336362	0.336362		ALDEx2_t
0 mg/mL - 6.60 mg/mL	p__Firmicutes|c__Clostridia|o__Clostridiales|f__Lachnospiraceae|g__Lachnoclostridium|s__Lachnoclostridium phytofermentans	1.00432	1.88906	0.511154	0.302557	0.0862266	0.286935	0.113442	0.295933	0.295933		ALDEx2_t
0 mg/mL - 6.60 mg/mL	p__Firmicutes|c__Clostridia|o__Clostridiales|f__Clostridiaceae|g__Hungatella|s__Hungatella hathewayi	-0.0048241	1.09831	-0.00383452	0.49858	0.636501	0.78874	0.678282	0.80386	0.80386		ALDEx2_t
0 mg/mL - 6.60 mg/mL	p__Firmicutes|c__Clostridia|o__Clostridiales|f__Lachnospiraceae|g__Kineothrix|s__Kineothrix alysoides	-0.224641	1.30826	-0.106388	0.40625	0.699216	0.837217	0.537756	0.699629	0.699629		ALDEx2_t
0 mg/mL - 6.60 mg/mL	p__Verrucomicrobia|c__Verrucomicrobiae|o__Verrucomicrobiales|f__Akkermansiaceae|g__Akkermansia|s__Akkermansia muciniphila	4.63849	5.29123	0.801959	0.200284	0.0161696	0.109186	0.0139775	0.0877152	0.0877152		ALDEx2_t
0 mg/mL - 6.60 mg/mL	p__Firmicutes|c__Clostridia|o__Clostridiales|f__Clostridiaceae|g__Clostridium|s__Clostridium sp. BNL1100	-1.53879	2.35817	-0.564751	0.231534	0.0569933	0.223562	0.024168	0.126468	0.126468		ALDEx2_t
0 mg/mL - 6.60 mg/mL	p__Firmicutes|c__Clostridia|o__Clostridiales|f__Lachnospiraceae|g__Lacrimispora|s__Lacrimispora sphenoides	-0.748706	2.12019	-0.273623	0.37305	0.516108	0.695594	0.243358	0.458919	0.458919		ALDEx2_t
0 mg/mL - 6.60 mg/mL	p__Firmicutes|c__Clostridia|o__Clostridiales|f__Ruminococcaceae|g__Flavonifractor|s__Flavonifractor plautii	1.47865	2.66936	0.509031	0.27234	0.068503	0.254537	0.0548081	0.194886	0.194886		ALDEx2_t
0 mg/mL - 6.60 mg/mL	p__Firmicutes|c__Clostridia|o__Clostridiales|f__Eubacteriaceae|g__Eubacterium|s__Eubacterium coprostanoligenes	-0.976032	2.74964	-0.344289	0.343262	0.226279	0.451877	0.218038	0.424503	0.424503		ALDEx2_t
0 mg/mL - 6.60 mg/mL	p__Firmicutes|c__Clostridia|o__Clostridiales|f__Lachnospiraceae|g__Acetatifactor|s__Acetatifactor muris	0.413126	1.62005	0.184222	0.358865	0.213919	0.449856	0.35351	0.542458	0.542458		ALDEx2_t
0 mg/mL - 6.60 mg/mL	p__Firmicutes|c__Clostridia|o__Clostridiales|f__Lachnospiraceae|g__Herbinix|s__Herbinix luporum	0.85284	1.45863	0.516056	0.295455	0.071308	0.254464	0.0883885	0.25027	0.25027		ALDEx2_t
0 mg/mL - 6.60 mg/mL	p__Firmicutes|c__Clostridia|o__Clostridiales|f__Lachnospiraceae|g__Faecalimonas|s__Faecalimonas umbilicata	-0.411459	1.86265	-0.223878	0.412766	0.59776	0.761857	0.503528	0.679485	0.679485		ALDEx2_t
0 mg/mL - 6.60 mg/mL	p__Firmicutes|c__Clostridia|o__Clostridiales|f__Lachnospiraceae|g__Lachnoclostridium|s__Lachnoclostridium sp. YL32	-0.368889	1.10134	-0.284019	0.365957	0.505838	0.681144	0.357736	0.542107	0.542107		ALDEx2_t
0 mg/mL - 6.60 mg/mL	p__Firmicutes|c__Clostridia|o__Clostridiales|f__Ruminococcaceae|g__Phocea|s__Phocea massiliensis	0.548156	1.32419	0.345246	0.324823	0.34283	0.539809	0.192899	0.367268	0.367268		ALDEx2_t
0 mg/mL - 6.60 mg/mL	p__Firmicutes|c__Clostridia|o__Clostridiales|f__Christensenellaceae|g__Christensenella|s__Christensenella massiliensis	1.20451	1.86545	0.550103	0.264205	0.0819357	0.270129	0.0676364	0.218348	0.218348		ALDEx2_t
0 mg/mL - 6.60 mg/mL	p__Firmicutes|c__Clostridia|o__Clostridiales|f__Christensenellaceae|g__Christensenella|s__Christensenella minuta	-0.632067	2.301	-0.232993	0.377841	0.360905	0.576293	0.389293	0.587251	0.587251		ALDEx2_t
0 mg/mL - 6.60 mg/mL	p__Firmicutes|c__Clostridia|o__Clostridiales|f__Lachnospiraceae|g__Enterocloster|s__Enterocloster bolteae	0.371452	1.69786	0.143988	0.409929	0.418635	0.629636	0.486094	0.658164	0.658164		ALDEx2_t
0 mg/mL - 6.60 mg/mL	p__Firmicutes|c__Clostridia|o__Clostridiales|f__Ruminococcaceae|g__|s__[Eubacterium] siraeum	-0.971085	2.82647	-0.294677	0.346591	0.143439	0.360976	0.254729	0.452456	0.452456		ALDEx2_t
0 mg/mL - 6.60 mg/mL	p__Firmicutes|c__Clostridia|o__Clostridiales|f__Ruminococcaceae|g__Ruminococcus|s__Ruminococcus champanellensis	-1.55415	5.95475	-0.252562	0.372159	0.396222	0.59441	0.326959	0.530226	0.530226		ALDEx2_t
0 mg/mL - 6.60 mg/mL	p__Firmicutes|c__Clostridia|o__Clostridiales|f__Eubacteriaceae|g__Eubacterium|s__Eubacterium xylanophilum	-1.77448	3.58346	-0.411525	0.276596	0.0964887	0.274431	0.078453	0.232294	0.232294		ALDEx2_t
0 mg/mL - 6.60 mg/mL	p__Firmicutes|c__Bacilli|o__Lactobacillales|f__Lactobacillaceae|g__Lactobacillus|s__Lactobacillus johnsonii	-2.13436	3.36642	-0.58128	0.239716	0.0244707	0.155115	0.0367201	0.154219	0.154219		ALDEx2_t
0 mg/mL - 6.60 mg/mL	p__Firmicutes|c__Clostridia|o__Clostridiales|f__Lachnospiraceae|g__Butyrivibrio|s__Butyrivibrio crossotus	0.325665	1.60531	0.153486	0.416193	0.373729	0.585566	0.524238	0.676923	0.676923		ALDEx2_t
0 mg/mL - 6.60 mg/mL	p__Firmicutes|c__Clostridia|o__Clostridiales|f__Ruminococcaceae|g__Pseudoflavonifractor|s__Pseudoflavonifractor phocaeensis	1.80777	2.90868	0.510412	0.28227	0.144856	0.340475	0.074107	0.219896	0.219896		ALDEx2_t
0 mg/mL - 6.60 mg/mL	p__Firmicutes|c__Clostridia|o__Clostridiales|f__Oscillospiraceae|g__Oscillibacter|s__Oscillibacter sp. PEA192	0.955464	2.02557	0.415246	0.285511	0.122143	0.328914	0.130924	0.306695	0.306695		ALDEx2_t
0 mg/mL - 6.60 mg/mL	p__Firmicutes|c__Clostridia|o__Clostridiales|f__Lachnospiraceae|g__Blautia|s__Blautia sp. YL58	-1.09468	2.41659	-0.366315	0.28227	0.205705	0.399247	0.102234	0.263118	0.263118		ALDEx2_t
0 mg/mL - 6.60 mg/mL	p__Firmicutes|c__Clostridia|o__Clostridiales|f__Lachnospiraceae|g__Anaerocolumna|s__Anaerocolumna cellulosilytica	0.0581098	1.75264	0.0291991	0.483688	0.561662	0.738019	0.650147	0.786225	0.786225		ALDEx2_t
0 mg/mL - 6.60 mg/mL	p__Firmicutes|c__Clostridia|o__Clostridiales|f__Lachnospiraceae|g__Blautia|s__Blautia producta	-0.285	1.91998	-0.118373	0.443182	0.647704	0.793123	0.575678	0.725856	0.725856		ALDEx2_t
0 mg/mL - 6.60 mg/mL	p__Firmicutes|c__Clostridia|o__Clostridiales|f__Lachnospiraceae|g__Faecalicatena|s__Faecalicatena orotica	0.469433	1.7657	0.248336	0.392045	0.354083	0.570756	0.381935	0.570208	0.570208		ALDEx2_t
0 mg/mL - 6.60 mg/mL	p__Firmicutes|c__Clostridia|o__Clostridiales|f__Lachnospiraceae|g__Robinsoniella|s__Robinsoniella peoriensis	-0.631775	2.46833	-0.214832	0.399148	0.279846	0.50236	0.353802	0.550103	0.550103		ALDEx2_t
0 mg/mL - 6.60 mg/mL	p__Firmicutes|c__Clostridia|o__Clostridiales|f__Catabacteriaceae|g__Catabacter|s__Catabacter hongkongensis	1.31519	3.03323	0.339667	0.28227	0.198272	0.413545	0.0945195	0.25853	0.25853		ALDEx2_t
0 mg/mL - 6.60 mg/mL	p__Firmicutes|c__Clostridia|o__Clostridiales|f__Lachnospiraceae|g__Anaerotignum|s__Anaerotignum lactatifermentans	2.24666	2.71682	0.735668	0.180142	0.0333924	0.162793	0.0124467	0.0765299	0.0765299		ALDEx2_t
0 mg/mL - 6.60 mg/mL	p__Firmicutes|c__Clostridia|o__Clostridiales|f__|g__Intestinimonas|s__Intestinimonas butyriciproducens	1.71465	2.73138	0.53088	0.254261	0.0451466	0.211905	0.0431195	0.162061	0.162061		ALDEx2_t
0 mg/mL - 6.60 mg/mL	p__Firmicutes|c__Clostridia|o__Clostridiales|f__Lachnospiraceae|g__Eisenbergiella|s__Eisenbergiella tayi	-0.77215	1.86214	-0.334434	0.33617	0.364469	0.549246	0.210397	0.383657	0.383657		ALDEx2_t
0 mg/mL - 6.60 mg/mL	p__Firmicutes|c__Clostridia|o__Clostridiales|f__Hungateiclostridiaceae|g__Hungateiclostridium|s__Hungateiclostridium alkalicellulosi	-2.43023	3.49104	-0.634719	0.190341	0.0948507	0.246887	0.0143103	0.093119	0.093119		ALDEx2_t
0 mg/mL - 6.60 mg/mL	p__Firmicutes|c__Clostridia|o__Clostridiales|f__Clostridiaceae|g__Geosporobacter|s__Geosporobacter ferrireducens	-0.447699	3.33647	-0.113688	0.443972	0.523392	0.696355	0.652492	0.787964	0.787964		ALDEx2_t
0 mg/mL - 6.60 mg/mL	p__Firmicutes|c__Clostridia|o__Clostridiales|f__Lachnospiraceae|g__Lacrimispora|s__Lacrimispora indolis	-0.502364	2.06874	-0.199916	0.408511	0.573667	0.732301	0.434892	0.610584	0.610584		ALDEx2_t
0 mg/mL - 6.60 mg/mL	p__Firmicutes|c__Clostridia|o__Clostridiales|f__Lachnospiraceae|g__|s__Lachnospiraceae bacterium Choco86	-0.266436	2.0033	-0.0862468	0.446809	0.399588	0.601948	0.539371	0.69533	0.69533		ALDEx2_t
0 mg/mL - 6.60 mg/mL	p__Firmicutes|c__Clostridia|o__Clostridiales|f__Hungateiclostridiaceae|g__Pseudoclostridium|s__Pseudoclostridium thermosuccinogenes	-2.07807	3.37685	-0.540546	0.232955	0.0669911	0.216545	0.0348461	0.14154	0.14154		ALDEx2_t
0 mg/mL - 6.60 mg/mL	p__Firmicutes|c__Clostridia|o__Clostridiales|f__Lachnospiraceae|g__Mediterraneibacter|s__[Ruminococcus] gnavus	-0.139872	2.10105	-0.0482606	0.466667	0.616713	0.76572	0.647481	0.774334	0.774334		ALDEx2_t
0 mg/mL - 6.60 mg/mL	p__Firmicutes|c__Clostridia|o__Clostridiales|f__Clostridiaceae|g__Clostridium|s__Clostridium sp. SY8519	1.44986	3.29499	0.37958	0.289362	0.182004	0.383075	0.132067	0.306663	0.306663		ALDEx2_t
0 mg/mL - 6.60 mg/mL	p__Firmicutes|c__Clostridia|o__Clostridiales|f__Peptostreptococcaceae|g__Clostridioides|s__Clostridioides difficile	2.37236	3.06835	0.673827	0.203125	0.0773571	0.23124	0.0255388	0.115489	0.115489		ALDEx2_t
0 mg/mL - 6.60 mg/mL	p__Firmicutes|c__Clostridia|o__Clostridiales|f__Ruminococcaceae|g__Pseudoflavonifractor|s__Pseudoflavonifractor capillosus	0.641665	2.92478	0.167873	0.404255	0.463811	0.650069	0.396254	0.58692	0.58692		ALDEx2_t
0 mg/mL - 6.60 mg/mL	p__Firmicutes|c__Clostridia|o__Clostridiales|f__Clostridiaceae|g__Clostridium|s__Clostridium botulinum	0.571226	3.26738	0.129995	0.419858	0.522105	0.702946	0.52085	0.687955	0.687955		ALDEx2_t
0 mg/mL - 6.60 mg/mL	p__Firmicutes|c__Clostridia|o__Clostridiales|f__Lachnospiraceae|g__Lachnoclostridium|s__[Clostridium] polysaccharolyticum	0.191097	2.36194	0.0599895	0.466667	0.558997	0.732832	0.606002	0.753123	0.753123		ALDEx2_t
0 mg/mL - 6.60 mg/mL	p__Firmicutes|c__Clostridia|o__Clostridiales|f__Ruminococcaceae|g__Ruminococcus|s__Ruminococcus bicirculans	-1.15535	3.72156	-0.272757	0.374468	0.36951	0.571424	0.365803	0.564	0.564		ALDEx2_t
0 mg/mL - 6.60 mg/mL	p__Firmicutes|c__Clostridia|o__Clostridiales|f__Ruminococcaceae|g__Paludicola|s__Paludicola psychrotolerans	2.27989	3.29115	0.648635	0.205674	0.0536728	0.211723	0.0233266	0.113995	0.113995		ALDEx2_t
0 mg/mL - 6.60 mg/mL	p__Firmicutes|c__Clostridia|o__Clostridiales|f__Lachnospiraceae|g__Roseburia|s__Roseburia intestinalis	-0.221836	2.06883	-0.0723814	0.450284	0.536947	0.713612	0.563395	0.708574	0.708574		ALDEx2_t
0 mg/mL - 6.60 mg/mL	p__Firmicutes|c__Clostridia|o__Clostridiales|f__Ruminococcaceae|g__Acetivibrio|s__Acetivibrio ethanolgignens	-0.824776	1.99853	-0.335851	0.334752	0.298074	0.494289	0.211825	0.387834	0.387834		ALDEx2_t
0 mg/mL - 6.60 mg/mL	p__Firmicutes|c__Clostridia|o__Clostridiales|f__Lachnospiraceae|g__Lachnoclostridium|s__Lachnoclostridium pacaense	0.553452	2.65873	0.172543	0.409091	0.503803	0.679698	0.458759	0.626613	0.626613		ALDEx2_t
0 mg/mL - 6.60 mg/mL	p__Firmicutes|c__Clostridia|o__Clostridiales|f__Lachnospiraceae|g__Anaerostipes|s__Anaerostipes hadrus	0.8002	2.98848	0.200377	0.385816	0.410435	0.615717	0.351332	0.551016	0.551016		ALDEx2_t
0 mg/mL - 6.60 mg/mL	p__Firmicutes|c__Clostridia|o__Clostridiales|f__Hungateiclostridiaceae|g__Hungateiclostridium|s__Hungateiclostridium aldrichii	-1.93675	3.27034	-0.560463	0.232624	0.0320469	0.159296	0.0449422	0.154559	0.154559		ALDEx2_t
0 mg/mL - 6.60 mg/mL	p__Firmicutes|c__Clostridia|o__Clostridiales|f__Lachnospiraceae|g__Anaerotignum|s__Anaerotignum aminivorans	2.58463	3.17842	0.707231	0.184659	0.0181331	0.125058	0.0106289	0.0673042	0.0673042		ALDEx2_t
0 mg/mL - 6.60 mg/mL	p__Firmicutes|c__Clostridia|o__Clostridiales|f__Christensenellaceae|g__Christensenella|s__Christensenella timonensis	1.39407	3.46749	0.358655	0.295455	0.156331	0.363207	0.138122	0.310584	0.310584		ALDEx2_t
0 mg/mL - 6.60 mg/mL	p__Firmicutes|c__Clostridia|o__Clostridiales|f__Lachnospiraceae|g__Lacrimispora|s__Lacrimispora amygdalina	0.421462	2.53695	0.142083	0.429787	0.486952	0.675282	0.505616	0.666429	0.666429		ALDEx2_t
0 mg/mL - 6.60 mg/mL	p__Firmicutes|c__Clostridia|o__Clostridiales|f__Clostridiaceae|g__Clostridium|s__Clostridium tarantellae	-0.3825	3.08808	-0.109319	0.438298	0.568548	0.731132	0.607453	0.743	0.743		ALDEx2_t
0 mg/mL - 6.60 mg/mL	p__Firmicutes|c__Clostridia|o__Clostridiales|f__Lachnospiraceae|g__Blautia|s__Blautia sp. SC05B48	-0.251542	2.81732	-0.0724521	0.458807	0.548202	0.721325	0.609381	0.753997	0.753997		ALDEx2_t
0 mg/mL - 6.60 mg/mL	p__Firmicutes|c__Clostridia|o__Clostridiales|f__Ruminococcaceae|g__Acutalibacter|s__Acutalibacter muris	0.509535	3.74545	0.0923291	0.455319	0.628661	0.777213	0.649725	0.782063	0.782063		ALDEx2_t
0 mg/mL - 6.60 mg/mL	p__Firmicutes|c__Clostridia|o__Clostridiales|f__Hungateiclostridiaceae|g__Hungateiclostridium|s__Hungateiclostridium saccincola	-2.18145	3.39731	-0.563035	0.232955	0.0776094	0.230391	0.0507142	0.168232	0.168232		ALDEx2_t
0 mg/mL - 6.60 mg/mL	p__Firmicutes|c__Clostridia|o__Clostridiales|f__Eubacteriaceae|g__Eubacterium|s__Eubacterium oxidoreducens	-0.159581	3.07015	-0.0375125	0.479433	0.553282	0.732403	0.609441	0.751575	0.751575		ALDEx2_t
0 mg/mL - 6.60 mg/mL	p__Firmicutes|c__Clostridia|o__Clostridiales|f__Lachnospiraceae|g__Bariatricus|s__Bariatricus massiliensis	1.56205	3.2004	0.400645	0.29078	0.154788	0.347033	0.141165	0.301837	0.301837		ALDEx2_t
0 mg/mL - 6.60 mg/mL	p__Firmicutes|c__Clostridia|o__Clostridiales|f__Lachnospiraceae|g__Anaerostipes|s__Anaerostipes butyraticus	-0.182126	3.03707	-0.0506516	0.466667	0.550005	0.725451	0.621286	0.761353	0.761353		ALDEx2_t
0 mg/mL - 6.60 mg/mL	p__Firmicutes|c__Clostridia|o__Clostridiales|f__|g__Colidextribacter|s__Colidextribacter massiliensis	0.457979	2.99814	0.124163	0.432624	0.441325	0.631646	0.494489	0.65773	0.65773		ALDEx2_t
0 mg/mL - 6.60 mg/mL	p__Firmicutes|c__Bacilli|o__Lactobacillales|f__Lactobacillaceae|g__Lactobacillus|s__Lactobacillus rogosae	-1.75755	4.82545	-0.315371	0.348011	0.241764	0.443093	0.241242	0.421317	0.421317		ALDEx2_t
0 mg/mL - 6.60 mg/mL	p__Firmicutes|c__Clostridia|o__Clostridiales|f__Lachnospiraceae|g__Lachnoclostridium|s__[Clostridium] populeti	-1.42813	3.57064	-0.327694	0.316761	0.222503	0.419803	0.203082	0.390617	0.390617		ALDEx2_t
0 mg/mL - 6.60 mg/mL	p__Firmicutes|c__Clostridia|o__Clostridiales|f__Lachnospiraceae|g__Lacrimispora|s__Lacrimispora algidixylanolytica	-0.620866	3.77969	-0.146923	0.420455	0.519394	0.693659	0.533557	0.692047	0.692047		ALDEx2_t
0 mg/mL - 6.60 mg/mL	p__Firmicutes|c__Clostridia|o__Clostridiales|f__Lachnospiraceae|g__Anaerostipes|s__Anaerostipes rhamnosivorans	-1.36507	3.294	-0.392141	0.313475	0.17887	0.363501	0.166719	0.342514	0.342514		ALDEx2_t
0 mg/mL - 6.60 mg/mL	p__Firmicutes|c__Clostridia|o__Clostridiales|f__Lachnospiraceae|g__Lacrimispora|s__Lacrimispora celerecrescens	-0.0594864	3.8208	-0.0164368	0.489362	0.611258	0.766618	0.691129	0.815066	0.815066		ALDEx2_t
0 mg/mL - 6.60 mg/mL	p__Firmicutes|c__Clostridia|o__Clostridiales|f__Clostridiaceae|g__Butyricicoccus|s__Butyricicoccus pullicaecorum	1.92088	3.80913	0.437297	0.269504	0.164021	0.348318	0.100316	0.23937	0.23937		ALDEx2_t
0 mg/mL - 6.60 mg/mL	p__Firmicutes|c__Clostridia|o__Clostridiales|f__Hungateiclostridiaceae|g__Anaerobacterium|s__Anaerobacterium chartisolvens	-2.14981	3.48099	-0.551854	0.231206	0.0750071	0.221923	0.0492135	0.164639	0.164639		ALDEx2_t
0 mg/mL - 6.60 mg/mL	p__Firmicutes|c__Clostridia|o__Clostridiales|f__Ruminococcaceae|g__Hydrogenoanaerobacterium|s__Hydrogenoanaerobacterium saccharovorans	0.669461	3.55548	0.163588	0.40625	0.466304	0.650498	0.463971	0.631991	0.631991		ALDEx2_t
0 mg/mL - 6.60 mg/mL	p__Firmicutes|c__Clostridia|o__Clostridiales|f__Peptococcaceae|g__Dehalobacterium|s__Dehalobacterium formicoaceticum	0.862487	3.92439	0.179809	0.402837	0.428459	0.62306	0.486427	0.650103	0.650103		ALDEx2_t
0 mg/mL - 6.60 mg/mL	p__Firmicutes|c__Clostridia|o__Clostridiales|f__Ruminococcaceae|g__Negativibacillus|s__Negativibacillus massiliensis	1.14336	3.55381	0.253915	0.34233	0.360328	0.559772	0.27105	0.453351	0.453351		ALDEx2_t
0 mg/mL - 6.60 mg/mL	p__Firmicutes|c__Clostridia|o__Clostridiales|f__Clostridiaceae|g__Falcatimonas|s__Falcatimonas natans	0.752016	3.93561	0.172666	0.407092	0.494334	0.667358	0.450058	0.62259	0.62259		ALDEx2_t
0 mg/mL - 6.60 mg/mL	p__Firmicutes|c__Clostridia|o__Clostridiales|f__Ruminococcaceae|g__Harryflintia|s__Harryflintia acetispora	1.94658	3.58558	0.515994	0.245739	0.0928186	0.274985	0.0727907	0.205578	0.205578		ALDEx2_t
0 mg/mL - 6.60 mg/mL	p__Firmicutes|c__Clostridia|o__Clostridiales|f__Lachnospiraceae|g__Anaerocolumna|s__Anaerocolumna xylanovorans	0.280877	3.33183	0.0687994	0.462411	0.594358	0.75737	0.607514	0.749543	0.749543		ALDEx2_t
0 mg/mL - 6.60 mg/mL	p__Firmicutes|c__Clostridia|o__Clostridiales|f__|g__|s__Clostridiales bacterium CCNA10	2.11598	3.51413	0.541935	0.228693	0.101185	0.266915	0.0520675	0.16052	0.16052		ALDEx2_t
0 mg/mL - 6.60 mg/mL	p__Firmicutes|c__Clostridia|o__Clostridiales|f__Hungateiclostridiaceae|g__Hungateiclostridium|s__Hungateiclostridium cellulolyticum	-1.33364	4.09369	-0.260009	0.358865	0.394254	0.576602	0.333575	0.509201	0.509201		ALDEx2_t
0 mg/mL - 6.60 mg/mL	p__Firmicutes|c__Clostridia|o__Clostridiales|f__Clostridiaceae|g__Clostridium|s__Clostridium sp. JN-9	-0.0166473	3.6143	-0.00651788	0.497159	0.572762	0.745868	0.65814	0.786531	0.786531		ALDEx2_t
0 mg/mL - 6.60 mg/mL	p__Firmicutes|c__Clostridia|o__Clostridiales|f__Peptococcaceae|g__|s__Peptococcaceae bacterium DCMF	0.405579	3.91948	0.0802756	0.455966	0.589835	0.752098	0.629191	0.767848	0.767848		ALDEx2_t
0 mg/mL - 6.60 mg/mL	p__Firmicutes|c__Clostridia|o__Clostridiales|f__Lachnospiraceae|g__Roseburia|s__Roseburia hominis	0.0145236	3.63697	0.00342858	0.497872	0.591042	0.755926	0.613238	0.761105	0.761105		ALDEx2_t
0 mg/mL - 6.60 mg/mL	p__Firmicutes|c__Clostridia|o__Clostridiales|f__Clostridiaceae|g__Clostridium|s__Clostridium saudiense	-0.333944	4.78568	-0.0637339	0.463068	0.586722	0.75024	0.631367	0.771099	0.771099		ALDEx2_t
0 mg/mL - 6.60 mg/mL	p__Firmicutes|c__Clostridia|o__Clostridiales|f__Lachnospiraceae|g__Anaerobutyricum|s__Anaerobutyricum hallii	0.465945	3.24277	0.118492	0.423295	0.482031	0.664164	0.531714	0.68904	0.68904		ALDEx2_t
0 mg/mL - 6.60 mg/mL	p__Firmicutes|c__Clostridia|o__Clostridiales|f__|g__Ihubacter|s__Ihubacter massiliensis	0.490918	3.98319	0.118619	0.439716	0.569619	0.733722	0.58788	0.732356	0.732356		ALDEx2_t
0 mg/mL - 6.60 mg/mL	p__Firmicutes|c__Clostridia|o__Clostridiales|f__Ruminococcaceae|g__|s__[Clostridium] methylpentosum	-0.200381	3.66298	-0.0538082	0.47234	0.588078	0.747607	0.630767	0.765757	0.765757		ALDEx2_t
0 mg/mL - 6.60 mg/mL	p__Firmicutes|c__Clostridia|o__Clostridiales|f__|g__Massilistercora|s__Massilistercora timonensis	0.813872	3.40928	0.197808	0.387784	0.454465	0.641862	0.399228	0.56593	0.56593		ALDEx2_t
0 mg/mL - 6.60 mg/mL	p__Firmicutes|c__Clostridia|o__Clostridiales|f__Clostridiaceae|g__Clostridium|s__Clostridium disporicum	-0.527759	4.60648	-0.103923	0.441135	0.50337	0.680418	0.570712	0.713466	0.713466		ALDEx2_t
0 mg/mL - 6.60 mg/mL	p__Firmicutes|c__Clostridia|o__Clostridiales|f__Hungateiclostridiaceae|g__Ruminiclostridium|s__Ruminiclostridium cellulolyticum	-1.45114	3.61619	-0.330516	0.323404	0.241172	0.418554	0.217791	0.369535	0.369535		ALDEx2_t
0 mg/mL - 6.60 mg/mL	p__Firmicutes|c__Clostridia|o__Clostridiales|f__Clostridiaceae|g__Clostridium|s__Clostridium beijerinckii	0.0956601	4.56387	0.0174032	0.488636	0.583711	0.741962	0.643645	0.774907	0.774907		ALDEx2_t
0 mg/mL - 6.60 mg/mL	p__Firmicutes|c__Clostridia|o__Clostridiales|f__Lachnospiraceae|g__Parasporobacterium|s__Parasporobacterium paucivorans	-0.758539	3.65792	-0.184929	0.401418	0.456555	0.638297	0.437354	0.605347	0.605347		ALDEx2_t
0 mg/mL - 6.60 mg/mL	p__Firmicutes|c__Clostridia|o__Clostridiales|f__Ruminococcaceae|g__Papillibacter|s__Papillibacter cinnamivorans	0.21981	3.45017	0.0561103	0.461648	0.528531	0.706366	0.5961	0.74224	0.74224		ALDEx2_t
0 mg/mL - 6.60 mg/mL	p__Firmicutes|c__Clostridia|o__Clostridiales|f__Hungateiclostridiaceae|g__|s__Hungateiclostridiaceae bacterium KB18	0.403459	4.28008	0.0836688	0.460993	0.594185	0.754315	0.603297	0.748712	0.748712		ALDEx2_t
0 mg/mL - 6.60 mg/mL	p__Firmicutes|c__Clostridia|o__Clostridiales|f__Lachnospiraceae|g__Faecalicatena|s__Faecalicatena fissicatena	-2.21902	3.69608	-0.550961	0.224114	0.104022	0.244604	0.0488803	0.153357	0.153357		ALDEx2_t
0 mg/mL - 6.60 mg/mL	p__Firmicutes|c__Clostridia|o__Clostridiales|f__Clostridiaceae|g__Hungatella|s__Hungatella xylanolytica	0.0236967	4.09838	0.00382541	0.497872	0.568636	0.734469	0.609664	0.754315	0.754315		ALDEx2_t
0 mg/mL - 6.60 mg/mL	p__Firmicutes|c__Clostridia|o__Clostridiales|f__Hungateiclostridiaceae|g__Hungateiclostridium|s__Hungateiclostridium straminisolvens	-2.11564	4.12454	-0.450627	0.27234	0.183511	0.352365	0.113434	0.256705	0.256705		ALDEx2_t
0 mg/mL - 6.60 mg/mL	p__Firmicutes|c__Clostridia|o__Clostridiales|f__Lachnospiraceae|g__Schaedlerella|s__Schaedlerella arabinosiphila	-1.67749	3.80942	-0.388531	0.297872	0.194626	0.376743	0.133285	0.283551	0.283551		ALDEx2_t
0 mg/mL - 6.60 mg/mL	p__Firmicutes|c__Clostridia|o__Clostridiales|f__Ruminococcaceae|g__|s__[Clostridium] viride	0.778039	3.67844	0.164125	0.396307	0.456195	0.642682	0.431489	0.595056	0.595056		ALDEx2_t
0 mg/mL - 6.60 mg/mL	p__Firmicutes|c__Erysipelotrichia|o__Erysipelotrichales|f__Erysipelotrichaceae|g__Turicibacter|s__Turicibacter sp. H121	0.479754	4.54766	0.0907572	0.452482	0.505966	0.67588	0.536583	0.679808	0.679808		ALDEx2_t
0 mg/mL - 6.60 mg/mL	p__Firmicutes|c__Clostridia|o__Clostridiales|f__Hungateiclostridiaceae|g__Hungateiclostridium|s__Hungateiclostridium thermocellum	-1.71878	3.9295	-0.383321	0.306383	0.200908	0.389216	0.163322	0.329556	0.329556		ALDEx2_t
0 mg/mL - 6.60 mg/mL	p__Firmicutes|c__Clostridia|o__Clostridiales|f__Clostridiaceae|g__Clostridium|s__Clostridium subterminale	1.08221	4.41298	0.217839	0.387234	0.413846	0.604725	0.412309	0.577648	0.577648		ALDEx2_t
0 mg/mL - 6.60 mg/mL	p__Firmicutes|c__Clostridia|o__Clostridiales|f__Lachnospiraceae|g__Faecalicatena|s__Faecalicatena contorta	-0.639473	3.27843	-0.160474	0.410511	0.36042	0.546034	0.411821	0.583308	0.583308		ALDEx2_t
0 mg/mL - 6.60 mg/mL	p__Bacteroidetes|c__Bacteroidia|o__Bacteroidales|f__Rikenellaceae|g__Alistipes|s__Alistipes finegoldii	0.0764573	4.57933	0.0191099	0.491477	0.547239	0.713815	0.555488	0.695045	0.695045		ALDEx2_t
0 mg/mL - 6.60 mg/mL	p__Firmicutes|c__Clostridia|o__Clostridiales|f__Clostridiaceae|g__Clostridium|s__Clostridium ventriculi	0.623772	3.69857	0.131724	0.425532	0.514779	0.683029	0.507157	0.664739	0.664739		ALDEx2_t
0 mg/mL - 6.60 mg/mL	p__Firmicutes|c__Clostridia|o__Clostridiales|f__Lachnospiraceae|g__Blautia|s__Blautia sp. N6H1-15	0.64944	4.24725	0.12704	0.440341	0.508787	0.687339	0.526191	0.679726	0.679726		ALDEx2_t
0 mg/mL - 6.60 mg/mL	p__Firmicutes|c__Clostridia|o__Clostridiales|f__Lachnospiraceae|g__|s__Lachnospiraceae bacterium oral taxon 500	-2.34313	3.38351	-0.606348	0.197443	0.0751779	0.194954	0.0387805	0.12592	0.12592		ALDEx2_t
0 mg/mL - 6.60 mg/mL	p__Firmicutes|c__Clostridia|o__Clostridiales|f__Ruminococcaceae|g__Anaeromassilibacillus|s__Anaeromassilibacillus senegalensis	-0.000957484	3.60699	-5.45055e-05	0.5	0.59735	0.750013	0.572233	0.721518	0.721518		ALDEx2_t
0 mg/mL - 6.60 mg/mL	p__Firmicutes|c__Clostridia|o__Clostridiales|f__Ruminococcaceae|g__Tepidibaculum|s__Tepidibaculum saccharolyticum	0.344888	4.6785	0.0743779	0.46875	0.567204	0.727432	0.59232	0.740195	0.740195		ALDEx2_t
0 mg/mL - 6.60 mg/mL	p__Firmicutes|c__Clostridia|o__Clostridiales|f__Ruminococcaceae|g__Caproiciproducens|s__Caproiciproducens galactitolivorans	0.658088	4.07701	0.136816	0.425532	0.496915	0.6718	0.521415	0.67477	0.67477		ALDEx2_t
0 mg/mL - 6.60 mg/mL	p__Firmicutes|c__Clostridia|o__Clostridiales|f__Ruminococcaceae|g__Faecalibacterium|s__Faecalibacterium prausnitzii	-0.931466	3.57012	-0.213257	0.370213	0.349049	0.537036	0.361008	0.52523	0.52523		ALDEx2_t
0 mg/mL - 6.60 mg/mL	p__Firmicutes|c__Clostridia|o__Clostridiales|f__Lachnospiraceae|g__Marvinbryantia|s__Marvinbryantia formatexigens	0.429886	3.71374	0.0942009	0.434043	0.52636	0.699144	0.523257	0.676127	0.676127		ALDEx2_t
0 mg/mL - 6.60 mg/mL	p__Firmicutes|c__Clostridia|o__Clostridiales|f__Lachnospiraceae|g__Lachnoclostridium|s__[Clostridium] scindens	-0.532444	3.91108	-0.123049	0.444602	0.511928	0.68503	0.538042	0.695181	0.695181		ALDEx2_t
0 mg/mL - 6.60 mg/mL	p__Firmicutes|c__Clostridia|o__Clostridiales|f__Hungateiclostridiaceae|g__Ruminiclostridium|s__Ruminiclostridium cellobioparum	-1.56464	3.84578	-0.344868	0.307801	0.255721	0.438948	0.247023	0.408569	0.408569		ALDEx2_t
0 mg/mL - 6.60 mg/mL	p__Firmicutes|c__Clostridia|o__Clostridiales|f__|g__Monoglobus|s__Monoglobus pectinilyticus	0.103215	4.44247	0.01973	0.487216	0.519258	0.685151	0.559397	0.709864	0.709864		ALDEx2_t
0 mg/mL - 6.60 mg/mL	p__Firmicutes|c__Erysipelotrichia|o__Erysipelotrichales|f__Erysipelotrichaceae|g__Breznakia|s__Breznakia pachnodae	-1.25179	3.88265	-0.27483	0.351773	0.351091	0.519526	0.323675	0.48344	0.48344		ALDEx2_t
0 mg/mL - 6.60 mg/mL	p__Bacteroidetes|c__Bacteroidia|o__Bacteroidales|f__Rikenellaceae|g__Alistipes|s__Alistipes communis	0.0350798	4.339	0.00394362	0.496454	0.500739	0.674575	0.51704	0.672562	0.672562		ALDEx2_t
0 mg/mL - 6.60 mg/mL	p__Firmicutes|c__Erysipelotrichia|o__Erysipelotrichales|f__Erysipelotrichaceae|g__Faecalitalea|s__Faecalitalea cylindroides	-1.73772	4.34253	-0.360458	0.344681	0.267487	0.454087	0.241614	0.404891	0.404891		ALDEx2_t
0 mg/mL - 6.60 mg/mL	p__Firmicutes|c__Clostridia|o__Clostridiales|f__Hungateiclostridiaceae|g__Hungateiclostridium|s__Hungateiclostridium clariflavum	-1.68088	3.96562	-0.351765	0.299716	0.27244	0.451059	0.22701	0.389562	0.389562		ALDEx2_t
0 mg/mL - 6.60 mg/mL	p__Tenericutes|c__Mollicutes|o__Entomoplasmatales|f__Spiroplasmataceae|g__Spiroplasma|s__Spiroplasma lampyridicola	-1.9469	4.18992	-0.418662	0.296875	0.255351	0.430036	0.185572	0.34101	0.34101		ALDEx2_t
0 mg/mL - 6.60 mg/mL	p__Tenericutes|c__Mollicutes|o__Entomoplasmatales|f__Spiroplasmataceae|g__Spiroplasma|s__Spiroplasma chrysopicola	-1.50221	4.27102	-0.312691	0.335227	0.29562	0.485755	0.271215	0.4413	0.4413		ALDEx2_t
0 mg/mL - 6.60 mg/mL	p__Bacteroidetes|c__Bacteroidia|o__Bacteroidales|f__Rikenellaceae|g__Alistipes|s__Alistipes dispar	0.184047	4.47217	0.0322443	0.48227	0.505463	0.677142	0.544082	0.686116	0.686116		ALDEx2_t
0 mg/mL - 6.60 mg/mL	p__Bacteroidetes|c__Bacteroidia|o__Bacteroidales|f__Rikenellaceae|g__Alistipes|s__Alistipes senegalensis	0.245314	4.23769	0.0467245	0.476596	0.540475	0.707376	0.525417	0.680524	0.680524		ALDEx2_t
0 mg/mL - 6.60 mg/mL	p__Firmicutes|c__Clostridia|o__Clostridiales|f__Peptostreptococcaceae|g__Romboutsia|s__Romboutsia ilealis	-0.570607	4.48622	-0.104123	0.435461	0.508941	0.686007	0.52284	0.680809	0.680809		ALDEx2_t
0 mg/mL - 6.60 mg/mL	p__Bacteroidetes|c__Bacteroidia|o__Bacteroidales|f__Rikenellaceae|g__Alistipes|s__Alistipes putredinis	0.239836	4.43387	0.044084	0.47017	0.497572	0.672013	0.527372	0.67788	0.67788		ALDEx2_t
0 mg/mL - 6.60 mg/mL	p__Tenericutes|c__Mollicutes|o__Entomoplasmatales|f__Spiroplasmataceae|g__Spiroplasma|s__Spiroplasma syrphidicola	-0.43363	4.33713	-0.089316	0.455319	0.461131	0.637414	0.501234	0.654238	0.654238		ALDEx2_t
0 mg/mL - 6.60 mg/mL	p__Firmicutes|c__Clostridia|o__Clostridiales|f__Peptostreptococcaceae|g__Romboutsia|s__Romboutsia timonensis	-0.114733	4.27827	-0.019192	0.484375	0.523604	0.693836	0.577638	0.717804	0.717804		ALDEx2_t
0 mg/mL - 0.80 mg/mL	p__Firmicutes|c__Clostridia|o__Clostridiales|f__Lachnospiraceae|g__|s__Lachnospiraceae bacterium GAM79	0.720927	1.91539	0.322665	0.343214	0.158491	0.747427	0.262544	0.820994	0.820994		ALDEx2_t
0 mg/mL - 0.80 mg/mL	p__Firmicutes|c__Clostridia|o__Clostridiales|f__Lachnospiraceae|g__Lacrimispora|s__Lacrimispora saccharolytica	1.03111	2.0809	0.43302	0.290172	0.151544	0.746065	0.147014	0.773235	0.773235		ALDEx2_t
0 mg/mL - 0.80 mg/mL	p__Firmicutes|c__Clostridia|o__Clostridiales|f__Lachnospiraceae|g__Eisenbergiella|s__Eisenbergiella massiliensis	0.735561	1.85184	0.339224	0.36875	0.128237	0.736687	0.332238	0.83797	0.83797		ALDEx2_t
0 mg/mL - 0.80 mg/mL	p__Firmicutes|c__Clostridia|o__Clostridiales|f__Eubacteriaceae|g__Eubacterium|s__Eubacterium ventriosum	-0.460114	2.75062	-0.163492	0.434375	0.585661	0.897908	0.63264	0.923609	0.923609		ALDEx2_t
0 mg/mL - 0.80 mg/mL	p__Firmicutes|c__Clostridia|o__Clostridiales|f__Lachnospiraceae|g__Lacrimispora|s__Lacrimispora sphenoides	1.53036	2.13493	0.628642	0.224649	0.0500096	0.690154	0.0377792	0.647416	0.647416		ALDEx2_t
0 mg/mL - 0.80 mg/mL	p__Firmicutes|c__Clostridia|o__Clostridiales|f__Eubacteriaceae|g__Eubacterium|s__Eubacterium coprostanoligenes	-0.633974	3.85979	-0.140065	0.421217	0.534164	0.879342	0.597412	0.910108	0.910108		ALDEx2_t
0 mg/mL - 0.80 mg/mL	p__Bacteroidetes|c__Bacteroidia|o__Bacteroidales|f__Muribaculaceae|g__Muribaculum|s__Muribaculum intestinale	-0.402478	6.87176	-0.0442477	0.478125	0.711577	0.929842	0.745925	0.948178	0.948178		ALDEx2_t
0 mg/mL - 0.80 mg/mL	p__Firmicutes|c__Clostridia|o__Clostridiales|f__Clostridiaceae|g__Clostridium|s__Clostridium sp. BNL1100	-0.250401	2.83746	-0.0774314	0.459375	0.693335	0.927385	0.72728	0.944244	0.944244		ALDEx2_t
0 mg/mL - 0.80 mg/mL	p__Firmicutes|c__Clostridia|o__Clostridiales|f__Clostridiaceae|g__Hungatella|s__Hungatella hathewayi	0.58408	1.78276	0.294533	0.368175	0.197587	0.764735	0.33033	0.83405	0.83405		ALDEx2_t
0 mg/mL - 0.80 mg/mL	p__Firmicutes|c__Clostridia|o__Clostridiales|f__Oscillospiraceae|g__Dysosmobacter|s__Dysosmobacter welbionis	-1.34193	3.24011	-0.388561	0.307813	0.143611	0.744502	0.175868	0.786876	0.786876		ALDEx2_t
0 mg/mL - 0.80 mg/mL	p__Firmicutes|c__Clostridia|o__Clostridiales|f__Lachnospiraceae|g__Kineothrix|s__Kineothrix alysoides	0.595834	1.71817	0.255476	0.323438	0.193893	0.763965	0.237308	0.797843	0.797843		ALDEx2_t
0 mg/mL - 0.80 mg/mL	p__Firmicutes|c__Clostridia|o__Clostridiales|f__|g__Flintibacter|s__Flintibacter sp. KGMB00164	0.186807	2.69232	0.0563691	0.464063	0.698866	0.925915	0.795416	0.958075	0.958075		ALDEx2_t
0 mg/mL - 0.80 mg/mL	p__Firmicutes|c__Clostridia|o__Clostridiales|f__Christensenellaceae|g__Christensenella|s__Christensenella minuta	1.19739	3.75561	0.223655	0.403125	0.689695	0.922349	0.512239	0.896904	0.896904		ALDEx2_t
0 mg/mL - 0.80 mg/mL	p__Firmicutes|c__Clostridia|o__Clostridiales|f__Eubacteriaceae|g__Eubacterium|s__Eubacterium xylanophilum	0.782102	3.34418	0.188459	0.417188	0.715521	0.927133	0.631038	0.921106	0.921106		ALDEx2_t
0 mg/mL - 0.80 mg/mL	p__Firmicutes|c__Clostridia|o__Clostridiales|f__Ruminococcaceae|g__Ruminococcus|s__Ruminococcus champanellensis	1.8815	6.04566	0.288125	0.360374	0.385698	0.824877	0.360165	0.845065	0.845065		ALDEx2_t
0 mg/mL - 0.80 mg/mL	p__Firmicutes|c__Clostridia|o__Clostridiales|f__Lachnospiraceae|g__Anaerotaenia|s__Anaerotaenia torta	-1.02576	2.61025	-0.3056	0.33125	0.257685	0.78356	0.255787	0.810918	0.810918		ALDEx2_t
0 mg/mL - 0.80 mg/mL	p__Firmicutes|c__Bacilli|o__Lactobacillales|f__Lactobacillaceae|g__Lactobacillus|s__Lactobacillus johnsonii	0.219791	3.81299	0.0438202	0.468019	0.751517	0.938246	0.786339	0.953725	0.953725		ALDEx2_t
0 mg/mL - 0.80 mg/mL	p__Firmicutes|c__Clostridia|o__Clostridiales|f__Lachnospiraceae|g__Faecalimonas|s__Faecalimonas umbilicata	-0.103521	2.7816	-0.0240787	0.4883	0.766329	0.944653	0.795604	0.957832	0.957832		ALDEx2_t
0 mg/mL - 0.80 mg/mL	p__Firmicutes|c__Clostridia|o__Clostridiales|f__Lachnospiraceae|g__Lachnoclostridium|s__Lachnoclostridium sp. YL32	-0.0500793	1.95664	-0.0221345	0.492188	0.704456	0.927738	0.775905	0.951961	0.951961		ALDEx2_t
0 mg/mL - 0.80 mg/mL	p__Firmicutes|c__Clostridia|o__Clostridiales|f__Lachnospiraceae|g__Lachnoclostridium|s__Lachnoclostridium phytofermentans	-1.54073	3.0465	-0.466312	0.289063	0.159286	0.74555	0.151227	0.757426	0.757426		ALDEx2_t
0 mg/mL - 0.80 mg/mL	p__Firmicutes|c__Clostridia|o__Clostridiales|f__Oscillospiraceae|g__Oscillibacter|s__Oscillibacter valericigenes	-1.11496	3.27836	-0.267506	0.349454	0.304505	0.798727	0.239901	0.808365	0.808365		ALDEx2_t
0 mg/mL - 0.80 mg/mL	p__Firmicutes|c__Clostridia|o__Clostridiales|f__Ruminococcaceae|g__|s__[Eubacterium] siraeum	-0.85258	3.17746	-0.240422	0.382813	0.210472	0.766557	0.402527	0.854153	0.854153		ALDEx2_t
0 mg/mL - 0.80 mg/mL	p__Firmicutes|c__Clostridia|o__Clostridiales|f__Lachnospiraceae|g__Acetatifactor|s__Acetatifactor muris	-0.825848	3.54726	-0.204288	0.393136	0.523496	0.875524	0.442991	0.872223	0.872223		ALDEx2_t
0 mg/mL - 0.80 mg/mL	p__Firmicutes|c__Clostridia|o__Clostridiales|f__Ruminococcaceae|g__Flavonifractor|s__Flavonifractor plautii	1.43111	3.24743	0.349752	0.332293	0.409011	0.830605	0.208565	0.792284	0.792284		ALDEx2_t
0 mg/mL - 0.80 mg/mL	p__Firmicutes|c__Clostridia|o__Clostridiales|f__Lachnospiraceae|g__Blautia|s__Blautia sp. YL58	0.596958	2.84619	0.165939	0.390625	0.645967	0.908607	0.466163	0.877257	0.877257		ALDEx2_t
0 mg/mL - 0.80 mg/mL	p__Firmicutes|c__Clostridia|o__Clostridiales|f__Christensenellaceae|g__Christensenella|s__Christensenella massiliensis	1.26081	3.01902	0.387634	0.318253	0.359504	0.813393	0.23246	0.798936	0.798936		ALDEx2_t
0 mg/mL - 0.80 mg/mL	p__Firmicutes|c__Clostridia|o__Clostridiales|f__Ruminococcaceae|g__Anaeromassilibacillus|s__Anaeromassilibacillus senegalensis	1.33951	5.17074	0.24534	0.389063	0.363499	0.807695	0.431071	0.848326	0.848326		ALDEx2_t
0 mg/mL - 0.80 mg/mL	p__Firmicutes|c__Clostridia|o__Clostridiales|f__Lachnospiraceae|g__Herbinix|s__Herbinix luporum	-0.318016	2.35806	-0.113264	0.432813	0.579152	0.889964	0.577027	0.90194	0.90194		ALDEx2_t
0 mg/mL - 0.80 mg/mL	p__Firmicutes|c__Clostridia|o__Clostridiales|f__Ruminococcaceae|g__Phocea|s__Phocea massiliensis	0.303195	2.25713	0.0990541	0.448438	0.633186	0.908738	0.68372	0.926593	0.926593		ALDEx2_t
0 mg/mL - 0.80 mg/mL	p__Firmicutes|c__Clostridia|o__Clostridiales|f__Lachnospiraceae|g__Lachnospira|s__Lachnospira eligens	-0.394307	2.66506	-0.14687	0.421217	0.359115	0.821552	0.563863	0.900692	0.900692		ALDEx2_t
0 mg/mL - 0.80 mg/mL	p__Firmicutes|c__Clostridia|o__Clostridiales|f__Hungateiclostridiaceae|g__Hungateiclostridium|s__Hungateiclostridium alkalicellulosi	-0.189595	4.01841	-0.0354392	0.478125	0.662201	0.910733	0.791703	0.952438	0.952438		ALDEx2_t
0 mg/mL - 0.80 mg/mL	p__Firmicutes|c__Clostridia|o__Clostridiales|f__Clostridiaceae|g__Geosporobacter|s__Geosporobacter ferrireducens	1.31302	3.9607	0.286583	0.354134	0.503443	0.862295	0.31524	0.822933	0.822933		ALDEx2_t
0 mg/mL - 0.80 mg/mL	p__Bacteroidetes|c__Bacteroidia|o__Bacteroidales|f__Rikenellaceae|g__Alistipes|s__Alistipes dispar	3.4135	5.99035	0.508687	0.293292	0.143631	0.697666	0.178535	0.728268	0.728268		ALDEx2_t
0 mg/mL - 0.80 mg/mL	p__Firmicutes|c__Clostridia|o__Clostridiales|f__Ruminococcaceae|g__Anaerotruncus|s__Anaerotruncus rubiinfantis	0.66866	2.32601	0.218687	0.365625	0.514215	0.862451	0.350821	0.83169	0.83169		ALDEx2_t
0 mg/mL - 0.80 mg/mL	p__Firmicutes|c__Clostridia|o__Clostridiales|f__Lachnospiraceae|g__Enterocloster|s__Enterocloster bolteae	-0.893797	2.60547	-0.281428	0.35	0.332124	0.80848	0.296341	0.815418	0.815418		ALDEx2_t
0 mg/mL - 0.80 mg/mL	p__Firmicutes|c__Clostridia|o__Clostridiales|f__Lachnospiraceae|g__Blautia|s__Blautia producta	0.0757972	2.72999	0.0216392	0.489063	0.635049	0.910782	0.756802	0.949671	0.949671		ALDEx2_t
0 mg/mL - 0.80 mg/mL	p__Firmicutes|c__Clostridia|o__Clostridiales|f__Lachnospiraceae|g__Eisenbergiella|s__Eisenbergiella tayi	0.615892	1.97704	0.248534	0.370313	0.382696	0.825169	0.36783	0.847331	0.847331		ALDEx2_t
0 mg/mL - 0.80 mg/mL	p__Firmicutes|c__Clostridia|o__Clostridiales|f__Hungateiclostridiaceae|g__Pseudoclostridium|s__Pseudoclostridium thermosuccinogenes	-0.272739	2.72513	-0.0720733	0.45625	0.612387	0.895639	0.669388	0.931289	0.931289		ALDEx2_t
0 mg/mL - 0.80 mg/mL	p__Firmicutes|c__Clostridia|o__Clostridiales|f__Lachnospiraceae|g__Butyrivibrio|s__Butyrivibrio crossotus	-0.0762149	2.56167	-0.0285434	0.489063	0.640149	0.910057	0.751007	0.945843	0.945843		ALDEx2_t
0 mg/mL - 0.80 mg/mL	p__Firmicutes|c__Clostridia|o__Clostridiales|f__Lachnospiraceae|g__Lacrimispora|s__Lacrimispora indolis	0.00621114	2.70042	0.000586806	0.49922	0.68134	0.919561	0.765406	0.951482	0.951482		ALDEx2_t
0 mg/mL - 0.80 mg/mL	p__Bacteroidetes|c__Bacteroidia|o__Bacteroidales|f__Muribaculaceae|g__Duncaniella|s__Duncaniella sp. B8	-0.254944	5.77859	-0.0301145	0.480499	0.668889	0.915226	0.697562	0.929989	0.929989		ALDEx2_t
0 mg/mL - 0.80 mg/mL	p__Firmicutes|c__Clostridia|o__Clostridiales|f__Hungateiclostridiaceae|g__Hungateiclostridium|s__Hungateiclostridium aldrichii	0.0370309	3.08802	0.0107625	0.496875	0.53865	0.879645	0.735762	0.940313	0.940313		ALDEx2_t
0 mg/mL - 0.80 mg/mL	p__Firmicutes|c__Clostridia|o__Clostridiales|f__Lachnospiraceae|g__Anaerocolumna|s__Anaerocolumna cellulosilytica	-1.42621	3.37812	-0.331218	0.310452	0.231382	0.775089	0.196093	0.785864	0.785864		ALDEx2_t
0 mg/mL - 0.80 mg/mL	p__Firmicutes|c__Clostridia|o__Clostridiales|f__Lachnospiraceae|g__|s__Lachnospiraceae bacterium Choco86	-0.804405	3.31626	-0.186644	0.403125	0.370217	0.826732	0.463697	0.876528	0.876528		ALDEx2_t
0 mg/mL - 0.80 mg/mL	p__Firmicutes|c__Clostridia|o__Clostridiales|f__Lachnospiraceae|g__Robinsoniella|s__Robinsoniella peoriensis	-0.598806	2.03266	-0.247574	0.346875	0.253199	0.778904	0.320196	0.81717	0.81717		ALDEx2_t
0 mg/mL - 0.80 mg/mL	p__Firmicutes|c__Clostridia|o__Clostridiales|f__Ruminococcaceae|g__Acutalibacter|s__Acutalibacter muris	0.314325	3.80966	0.0807795	0.457098	0.553686	0.877526	0.578726	0.899376	0.899376		ALDEx2_t
0 mg/mL - 0.80 mg/mL	p__Firmicutes|c__Clostridia|o__Clostridiales|f__Clostridiaceae|g__Clostridium|s__Clostridium botulinum	0.415062	4.32935	0.0851665	0.461778	0.646542	0.908101	0.706444	0.933379	0.933379		ALDEx2_t
0 mg/mL - 0.80 mg/mL	p__Firmicutes|c__Clostridia|o__Clostridiales|f__Lachnospiraceae|g__Faecalicatena|s__Faecalicatena orotica	-1.20305	2.798	-0.333717	0.335938	0.244554	0.776387	0.268536	0.813714	0.813714		ALDEx2_t
0 mg/mL - 0.80 mg/mL	p__Firmicutes|c__Clostridia|o__Clostridiales|f__Lachnospiraceae|g__Lachnoclostridium|s__[Clostridium] populeti	0.909898	3.56854	0.201543	0.386895	0.506377	0.864595	0.420277	0.850649	0.850649		ALDEx2_t
0 mg/mL - 0.80 mg/mL	p__Firmicutes|c__Clostridia|o__Clostridiales|f__Catabacteriaceae|g__Catabacter|s__Catabacter hongkongensis	0.277595	4.37537	0.0618604	0.465625	0.598365	0.894561	0.678292	0.925953	0.925953		ALDEx2_t
0 mg/mL - 0.80 mg/mL	p__Firmicutes|c__Clostridia|o__Clostridiales|f__Clostridiaceae|g__Clostridium|s__Clostridium tarantellae	-0.150773	4.55366	-0.0332482	0.486739	0.646304	0.909242	0.756512	0.948358	0.948358		ALDEx2_t
0 mg/mL - 0.80 mg/mL	p__Firmicutes|c__Clostridia|o__Clostridiales|f__Ruminococcaceae|g__Acetivibrio|s__Acetivibrio ethanolgignens	-0.464447	2.35341	-0.148194	0.413417	0.472523	0.847681	0.464227	0.861907	0.861907		ALDEx2_t
0 mg/mL - 0.80 mg/mL	p__Firmicutes|c__Clostridia|o__Clostridiales|f__Lachnospiraceae|g__Mediterraneibacter|s__[Ruminococcus] gnavus	-0.283982	2.63029	-0.0999394	0.448438	0.565631	0.887707	0.629546	0.919102	0.919102		ALDEx2_t
0 mg/mL - 0.80 mg/mL	p__Firmicutes|c__Clostridia|o__Clostridiales|f__Clostridiaceae|g__Clostridium|s__Clostridium merdae	2.76297	5.07505	0.495327	0.2875	0.194524	0.71291	0.184805	0.712602	0.712602		ALDEx2_t
0 mg/mL - 0.80 mg/mL	p__Firmicutes|c__Clostridia|o__Clostridiales|f__Ruminococcaceae|g__Ruminococcus|s__Ruminococcus bicirculans	-0.54624	3.81006	-0.127853	0.432813	0.629055	0.912389	0.607278	0.919082	0.919082		ALDEx2_t
0 mg/mL - 0.80 mg/mL	p__Firmicutes|c__Clostridia|o__Clostridiales|f__Christensenellaceae|g__Christensenella|s__Christensenella timonensis	1.18519	5.01254	0.204398	0.423438	0.556286	0.877104	0.584297	0.906644	0.906644		ALDEx2_t
0 mg/mL - 0.80 mg/mL	p__Firmicutes|c__Clostridia|o__Clostridiales|f__Hungateiclostridiaceae|g__Hungateiclostridium|s__Hungateiclostridium saccincola	-0.605101	3.10333	-0.146375	0.414977	0.477246	0.84911	0.554426	0.88908	0.88908		ALDEx2_t
0 mg/mL - 0.80 mg/mL	p__Firmicutes|c__Clostridia|o__Clostridiales|f__Clostridiaceae|g__Clostridium|s__Clostridium sp. SY8519	0.337477	4.37618	0.0713767	0.467188	0.597718	0.893114	0.652773	0.922109	0.922109		ALDEx2_t
0 mg/mL - 0.80 mg/mL	p__Firmicutes|c__Clostridia|o__Clostridiales|f__Hungateiclostridiaceae|g__Hungateiclostridium|s__Hungateiclostridium cellulolyticum	0.827725	4.16401	0.174337	0.409375	0.479629	0.854682	0.487704	0.877513	0.877513		ALDEx2_t
0 mg/mL - 0.80 mg/mL	p__Firmicutes|c__Clostridia|o__Clostridiales|f__Lachnospiraceae|g__Anaerostipes|s__Anaerostipes hadrus	0.806155	3.30824	0.213196	0.38125	0.455565	0.851101	0.441386	0.861378	0.861378		ALDEx2_t
0 mg/mL - 0.80 mg/mL	p__Firmicutes|c__Clostridia|o__Clostridiales|f__Oscillospiraceae|g__Oscillibacter|s__Oscillibacter sp. PEA192	-1.72442	3.21339	-0.47165	0.28125	0.139949	0.731738	0.130539	0.725161	0.725161		ALDEx2_t
0 mg/mL - 0.80 mg/mL	p__Firmicutes|c__Clostridia|o__Clostridiales|f__Lachnospiraceae|g__Lacrimispora|s__Lacrimispora amygdalina	1.04691	2.81264	0.323994	0.308892	0.270311	0.771261	0.219907	0.772325	0.772325		ALDEx2_t
0 mg/mL - 0.80 mg/mL	p__Firmicutes|c__Clostridia|o__Clostridiales|f__Lachnospiraceae|g__Lacrimispora|s__Lacrimispora celerecrescens	0.968612	4.13177	0.193436	0.399376	0.506406	0.859421	0.461077	0.861972	0.861972		ALDEx2_t
0 mg/mL - 0.80 mg/mL	p__Firmicutes|c__Bacilli|o__Lactobacillales|f__Lactobacillaceae|g__Lactobacillus|s__Lactobacillus rogosae	-0.351992	4.49569	-0.06764	0.469579	0.575823	0.885148	0.637555	0.911014	0.911014		ALDEx2_t
0 mg/mL - 0.80 mg/mL	p__Firmicutes|c__Clostridia|o__Clostridiales|f__Lachnospiraceae|g__Blautia|s__Blautia sp. SC05B48	-0.364386	3.31335	-0.0865968	0.451563	0.579989	0.890162	0.61259	0.910446	0.910446		ALDEx2_t
0 mg/mL - 0.80 mg/mL	p__Firmicutes|c__Clostridia|o__Clostridiales|f__Lachnospiraceae|g__Roseburia|s__Roseburia intestinalis	-1.18086	2.79291	-0.353942	0.30625	0.216792	0.758316	0.226159	0.766997	0.766997		ALDEx2_t
0 mg/mL - 0.80 mg/mL	p__Firmicutes|c__Erysipelotrichia|o__Erysipelotrichales|f__Erysipelotrichaceae|g__Turicibacter|s__Turicibacter sp. H121	1.89175	4.87101	0.329836	0.34375	0.310954	0.788692	0.309526	0.80698	0.80698		ALDEx2_t
0 mg/mL - 0.80 mg/mL	p__Firmicutes|c__Clostridia|o__Clostridiales|f__Lachnospiraceae|g__Lachnoclostridium|s__[Clostridium] polysaccharolyticum	-1.38122	3.33443	-0.370491	0.335413	0.252265	0.765671	0.238296	0.776738	0.776738		ALDEx2_t
0 mg/mL - 0.80 mg/mL	p__Firmicutes|c__Clostridia|o__Clostridiales|f__Lachnospiraceae|g__Anaerostipes|s__Anaerostipes butyraticus	0.600433	3.10377	0.152881	0.4	0.491526	0.859185	0.480652	0.863563	0.863563		ALDEx2_t
0 mg/mL - 0.80 mg/mL	p__Firmicutes|c__Clostridia|o__Clostridiales|f__Hungateiclostridiaceae|g__Anaerobacterium|s__Anaerobacterium chartisolvens	-1.22944	3.7233	-0.313756	0.334375	0.238191	0.768743	0.275525	0.804596	0.804596		ALDEx2_t
0 mg/mL - 0.80 mg/mL	p__Firmicutes|c__Clostridia|o__Clostridiales|f__Clostridiaceae|g__Clostridium|s__Clostridium saudiense	1.30065	4.99484	0.247191	0.386895	0.379804	0.817811	0.471838	0.858638	0.858638		ALDEx2_t
0 mg/mL - 0.80 mg/mL	p__Firmicutes|c__Clostridia|o__Clostridiales|f__Peptostreptococcaceae|g__Clostridioides|s__Clostridioides difficile	0.0609519	4.77254	0.0134417	0.49375	0.556119	0.877464	0.626494	0.911703	0.911703		ALDEx2_t
0 mg/mL - 0.80 mg/mL	p__Firmicutes|c__Clostridia|o__Clostridiales|f__Ruminococcaceae|g__Pseudoflavonifractor|s__Pseudoflavonifractor capillosus	-0.59128	3.37066	-0.160896	0.421217	0.47865	0.849027	0.534543	0.883161	0.883161		ALDEx2_t
0 mg/mL - 0.80 mg/mL	p__Firmicutes|c__Clostridia|o__Clostridiales|f__Lachnospiraceae|g__Anaerostipes|s__Anaerostipes rhamnosivorans	-1.04365	3.18361	-0.284474	0.352574	0.320442	0.799128	0.363602	0.82556	0.82556		ALDEx2_t
0 mg/mL - 0.80 mg/mL	p__Firmicutes|c__Clostridia|o__Clostridiales|f__Lachnospiraceae|g__Lacrimispora|s__Lacrimispora algidixylanolytica	-0.411444	3.54179	-0.105549	0.44375	0.541623	0.875759	0.592926	0.907859	0.907859		ALDEx2_t
0 mg/mL - 0.80 mg/mL	p__Firmicutes|c__Clostridia|o__Clostridiales|f__Lachnospiraceae|g__Bariatricus|s__Bariatricus massiliensis	1.03955	4.05503	0.231358	0.375	0.435736	0.836718	0.438557	0.857281	0.857281		ALDEx2_t
0 mg/mL - 0.80 mg/mL	p__Firmicutes|c__Clostridia|o__Clostridiales|f__|g__Intestinimonas|s__Intestinimonas butyriciproducens	-0.61396	3.63675	-0.136044	0.418097	0.559291	0.876416	0.569092	0.892117	0.892117		ALDEx2_t
0 mg/mL - 0.80 mg/mL	p__Firmicutes|c__Clostridia|o__Clostridiales|f__Hungateiclostridiaceae|g__|s__Hungateiclostridiaceae bacterium KB18	1.84949	4.52595	0.339621	0.326053	0.356814	0.7987	0.310224	0.807017	0.807017		ALDEx2_t
0 mg/mL - 0.80 mg/mL	p__Firmicutes|c__Clostridia|o__Clostridiales|f__Lachnospiraceae|g__|s__Lachnospiraceae bacterium oral taxon 500	-0.763298	3.65845	-0.180662	0.390016	0.51342	0.865441	0.477135	0.864379	0.864379		ALDEx2_t
0 mg/mL - 0.80 mg/mL	p__Firmicutes|c__Clostridia|o__Clostridiales|f__Lachnospiraceae|g__Anaerotignum|s__Anaerotignum lactatifermentans	-0.381794	4.03637	-0.075971	0.453978	0.550915	0.877183	0.634486	0.917123	0.917123		ALDEx2_t
0 mg/mL - 0.80 mg/mL	p__Firmicutes|c__Clostridia|o__Clostridiales|f__Peptostreptococcaceae|g__Romboutsia|s__Romboutsia ilealis	0.604966	4.94293	0.121455	0.44375	0.489587	0.858684	0.511033	0.878684	0.878684		ALDEx2_t
0 mg/mL - 0.80 mg/mL	p__Firmicutes|c__Clostridia|o__Clostridiales|f__Clostridiaceae|g__Clostridium|s__Clostridium ventriculi	0.406348	4.80043	0.0706977	0.465625	0.526505	0.866821	0.54591	0.887008	0.887008		ALDEx2_t
0 mg/mL - 0.80 mg/mL	p__Firmicutes|c__Clostridia|o__Clostridiales|f__Eubacteriaceae|g__Eubacterium|s__Eubacterium oxidoreducens	-0.925057	3.37128	-0.233736	0.379095	0.352855	0.808284	0.339932	0.821838	0.821838		ALDEx2_t
0 mg/mL - 0.80 mg/mL	p__Firmicutes|c__Clostridia|o__Clostridiales|f__|g__Colidextribacter|s__Colidextribacter massiliensis	0.219401	3.25358	0.0620406	0.464899	0.591147	0.89124	0.617996	0.915661	0.915661		ALDEx2_t
0 mg/mL - 0.80 mg/mL	p__Firmicutes|c__Clostridia|o__Clostridiales|f__Lachnospiraceae|g__Lachnoclostridium|s__Lachnoclostridium pacaense	-1.23872	3.44317	-0.305268	0.351014	0.290792	0.786905	0.324424	0.813312	0.813312		ALDEx2_t
0 mg/mL - 0.80 mg/mL	p__Firmicutes|c__Erysipelotrichia|o__Erysipelotrichales|f__Erysipelotrichaceae|g__Breznakia|s__Breznakia pachnodae	1.11419	4.21289	0.211822	0.377535	0.465596	0.855073	0.415777	0.842882	0.842882		ALDEx2_t
0 mg/mL - 0.80 mg/mL	p__Firmicutes|c__Clostridia|o__Clostridiales|f__Ruminococcaceae|g__Pseudoflavonifractor|s__Pseudoflavonifractor phocaeensis	-1.30212	3.36712	-0.336051	0.312013	0.296471	0.784191	0.265547	0.777796	0.777796		ALDEx2_t
0 mg/mL - 0.80 mg/mL	p__Firmicutes|c__Clostridia|o__Clostridiales|f__Clostridiaceae|g__Clostridium|s__Clostridium sp. JN-9	-0.23362	3.85794	-0.0587983	0.471875	0.570813	0.888697	0.62712	0.917869	0.917869		ALDEx2_t
0 mg/mL - 0.80 mg/mL	p__Firmicutes|c__Clostridia|o__Clostridiales|f__Peptococcaceae|g__Dehalobacterium|s__Dehalobacterium formicoaceticum	-0.162827	4.59683	-0.0344975	0.482059	0.579468	0.88506	0.61963	0.90946	0.90946		ALDEx2_t
0 mg/mL - 0.80 mg/mL	p__Firmicutes|c__Clostridia|o__Clostridiales|f__Lachnospiraceae|g__Roseburia|s__Roseburia hominis	-0.0510522	3.81375	-0.0104161	0.492188	0.521909	0.87166	0.574948	0.90338	0.90338		ALDEx2_t
0 mg/mL - 0.80 mg/mL	p__Firmicutes|c__Clostridia|o__Clostridiales|f__Lachnospiraceae|g__Schaedlerella|s__Schaedlerella arabinosiphila	-0.280728	3.70254	-0.0695939	0.4625	0.582719	0.890733	0.624863	0.915899	0.915899		ALDEx2_t
0 mg/mL - 0.80 mg/mL	p__Firmicutes|c__Clostridia|o__Clostridiales|f__Hungateiclostridiaceae|g__Ruminiclostridium|s__Ruminiclostridium cellobioparum	0.380234	4.00053	0.0890967	0.452418	0.549115	0.87152	0.631493	0.906571	0.906571		ALDEx2_t
0 mg/mL - 0.80 mg/mL	p__Firmicutes|c__Erysipelotrichia|o__Erysipelotrichales|f__Erysipelotrichaceae|g__Faecalitalea|s__Faecalitalea cylindroides	0.456629	4.23668	0.0857585	0.459375	0.547295	0.872995	0.597351	0.905117	0.905117		ALDEx2_t
0 mg/mL - 0.80 mg/mL	p__Firmicutes|c__Clostridia|o__Clostridiales|f__Hungateiclostridiaceae|g__Hungateiclostridium|s__Hungateiclostridium straminisolvens	-1.09799	4.11786	-0.22787	0.378125	0.420539	0.833968	0.396756	0.854802	0.854802		ALDEx2_t
0 mg/mL - 0.80 mg/mL	p__Firmicutes|c__Clostridia|o__Clostridiales|f__Hungateiclostridiaceae|g__Ruminiclostridium|s__Ruminiclostridium cellulolyticum	-1.10791	3.53006	-0.311534	0.335938	0.362281	0.797209	0.342896	0.797427	0.797427		ALDEx2_t
0 mg/mL - 0.80 mg/mL	p__Firmicutes|c__Clostridia|o__Clostridiales|f__Peptococcaceae|g__|s__Peptococcaceae bacterium DCMF	-0.288975	4.795	-0.04396	0.474259	0.527372	0.873254	0.5716	0.904109	0.904109		ALDEx2_t
0 mg/mL - 0.80 mg/mL	p__Firmicutes|c__Clostridia|o__Clostridiales|f__Clostridiaceae|g__Clostridium|s__Clostridium disporicum	0.425747	4.40401	0.0910683	0.45625	0.543735	0.86886	0.594641	0.896142	0.896142		ALDEx2_t
0 mg/mL - 0.80 mg/mL	p__Firmicutes|c__Clostridia|o__Clostridiales|f__Clostridiaceae|g__Falcatimonas|s__Falcatimonas natans	0.0540365	3.99929	0.0127853	0.490625	0.556597	0.875162	0.602305	0.905331	0.905331		ALDEx2_t
0 mg/mL - 0.80 mg/mL	p__Firmicutes|c__Clostridia|o__Clostridiales|f__Lachnospiraceae|g__Parasporobacterium|s__Parasporobacterium paucivorans	-0.474632	3.84579	-0.10463	0.438378	0.551213	0.875564	0.612067	0.901125	0.901125		ALDEx2_t
0 mg/mL - 0.80 mg/mL	p__Firmicutes|c__Clostridia|o__Clostridiales|f__Hungateiclostridiaceae|g__Hungateiclostridium|s__Hungateiclostridium thermocellum	-1.24607	4.2539	-0.254438	0.368175	0.39586	0.818057	0.385627	0.817246	0.817246		ALDEx2_t
0 mg/mL - 0.80 mg/mL	p__Firmicutes|c__Clostridia|o__Clostridiales|f__Lachnospiraceae|g__Faecalicatena|s__Faecalicatena fissicatena	-1.81441	3.91996	-0.416121	0.292188	0.268763	0.747376	0.212089	0.725464	0.725464		ALDEx2_t
0 mg/mL - 0.80 mg/mL	p__Firmicutes|c__Clostridia|o__Clostridiales|f__Ruminococcaceae|g__Caproiciproducens|s__Caproiciproducens galactitolivorans	1.45319	4.54886	0.285814	0.366615	0.420629	0.826128	0.391497	0.821492	0.821492		ALDEx2_t
0 mg/mL - 0.80 mg/mL	p__Firmicutes|c__Clostridia|o__Clostridiales|f__Ruminococcaceae|g__Paludicola|s__Paludicola psychrotolerans	0.16954	3.86506	0.0424201	0.475819	0.53284	0.872558	0.600999	0.902266	0.902266		ALDEx2_t
0 mg/mL - 0.80 mg/mL	p__Firmicutes|c__Clostridia|o__Clostridiales|f__Lachnospiraceae|g__Anaerocolumna|s__Anaerocolumna xylanovorans	-0.712868	3.7697	-0.146994	0.413417	0.469041	0.850516	0.508028	0.87775	0.87775		ALDEx2_t
0 mg/mL - 0.80 mg/mL	p__Bacteroidetes|c__Bacteroidia|o__Bacteroidales|f__Rikenellaceae|g__Alistipes|s__Alistipes megaguti	2.06357	4.58896	0.406286	0.298438	0.227901	0.734719	0.234845	0.728725	0.728725		ALDEx2_t
0 mg/mL - 0.80 mg/mL	p__Firmicutes|c__Clostridia|o__Clostridiales|f__Lachnospiraceae|g__Anaerobutyricum|s__Anaerobutyricum hallii	0.203795	3.75147	0.0520928	0.474259	0.568115	0.881397	0.629926	0.912364	0.912364		ALDEx2_t
0 mg/mL - 0.80 mg/mL	p__Tenericutes|c__Mollicutes|o__Entomoplasmatales|f__Spiroplasmataceae|g__Spiroplasma|s__Spiroplasma lampyridicola	-0.277878	4.18734	-0.0530674	0.469579	0.542888	0.872059	0.592761	0.902832	0.902832		ALDEx2_t
0 mg/mL - 0.80 mg/mL	p__Bacteroidetes|c__Bacteroidia|o__Bacteroidales|f__Rikenellaceae|g__Alistipes|s__Alistipes putredinis	2.22119	4.519	0.40445	0.297972	0.282884	0.741688	0.240436	0.736679	0.736679		ALDEx2_t
0 mg/mL - 0.80 mg/mL	p__Firmicutes|c__Clostridia|o__Clostridiales|f__Clostridiaceae|g__Clostridium|s__Clostridium beijerinckii	0.210213	4.33483	0.0409132	0.478939	0.543321	0.874455	0.590443	0.898254	0.898254		ALDEx2_t
0 mg/mL - 0.80 mg/mL	p__Firmicutes|c__Clostridia|o__Clostridiales|f__Hungateiclostridiaceae|g__Hungateiclostridium|s__Hungateiclostridium clariflavum	0.10893	3.86089	0.0270933	0.4875	0.538138	0.877742	0.611797	0.913941	0.913941		ALDEx2_t
0 mg/mL - 0.80 mg/mL	p__Bacteroidetes|c__Bacteroidia|o__Bacteroidales|f__Rikenellaceae|g__Alistipes|s__Alistipes senegalensis	2.22519	4.43846	0.437251	0.29375	0.271531	0.744952	0.1952	0.732754	0.732754		ALDEx2_t
0 mg/mL - 0.80 mg/mL	p__Firmicutes|c__Clostridia|o__Clostridiales|f__Ruminococcaceae|g__Hydrogenoanaerobacterium|s__Hydrogenoanaerobacterium saccharovorans	-0.617043	4.05047	-0.13112	0.428125	0.571187	0.88644	0.561599	0.89024	0.89024		ALDEx2_t
0 mg/mL - 0.80 mg/mL	p__Firmicutes|c__Clostridia|o__Clostridiales|f__Ruminococcaceae|g__Faecalibacterium|s__Faecalibacterium prausnitzii	-0.421606	3.66237	-0.100113	0.445313	0.523362	0.868586	0.550863	0.885295	0.885295		ALDEx2_t
0 mg/mL - 0.80 mg/mL	p__Firmicutes|c__Clostridia|o__Clostridiales|f__|g__Ihubacter|s__Ihubacter massiliensis	0.117376	3.83433	0.0205009	0.479688	0.537626	0.87209	0.587885	0.898156	0.898156		ALDEx2_t
0 mg/mL - 0.80 mg/mL	p__Firmicutes|c__Clostridia|o__Clostridiales|f__|g__Massilistercora|s__Massilistercora timonensis	0.074702	4.11427	0.0176449	0.489063	0.562131	0.88319	0.602145	0.905121	0.905121		ALDEx2_t
0 mg/mL - 0.80 mg/mL	p__Tenericutes|c__Mollicutes|o__Entomoplasmatales|f__Spiroplasmataceae|g__Spiroplasma|s__Spiroplasma chrysopicola	0.377512	4.11244	0.0695256	0.457813	0.513174	0.858999	0.552171	0.890879	0.890879		ALDEx2_t
0 mg/mL - 0.80 mg/mL	p__Firmicutes|c__Clostridia|o__Clostridiales|f__Lachnospiraceae|g__Blautia|s__Blautia sp. N6H1-15	0.753434	4.30361	0.146681	0.417188	0.497398	0.85581	0.51247	0.874758	0.874758		ALDEx2_t
0 mg/mL - 0.80 mg/mL	p__Firmicutes|c__Clostridia|o__Clostridiales|f__Lachnospiraceae|g__Faecalicatena|s__Faecalicatena contorta	-0.701331	3.41846	-0.164901	0.408736	0.459754	0.840679	0.471534	0.862019	0.862019		ALDEx2_t
0 mg/mL - 0.80 mg/mL	p__Firmicutes|c__Clostridia|o__Clostridiales|f__Ruminococcaceae|g__|s__[Clostridium] methylpentosum	-0.885607	3.69543	-0.221713	0.376563	0.435314	0.83529	0.409146	0.823762	0.823762		ALDEx2_t
0 mg/mL - 0.80 mg/mL	p__Firmicutes|c__Clostridia|o__Clostridiales|f__Clostridiaceae|g__Hungatella|s__Hungatella xylanolytica	-0.28496	4.40758	-0.0608362	0.470313	0.565002	0.877845	0.56725	0.890582	0.890582		ALDEx2_t
0 mg/mL - 0.80 mg/mL	p__Tenericutes|c__Mollicutes|o__Entomoplasmatales|f__Spiroplasmataceae|g__Spiroplasma|s__Spiroplasma syrphidicola	1.31529	4.56531	0.214666	0.393136	0.478903	0.845847	0.435321	0.848298	0.848298		ALDEx2_t
0 mg/mL - 0.80 mg/mL	p__Firmicutes|c__Clostridia|o__Clostridiales|f__Clostridiaceae|g__Clostridium|s__Clostridium subterminale	1.01448	4.5168	0.183553	0.396256	0.471632	0.844187	0.45058	0.856663	0.856663		ALDEx2_t
0 mg/mL - 0.80 mg/mL	p__Firmicutes|c__Clostridia|o__Clostridiales|f__Lachnospiraceae|g__Anaerotignum|s__Anaerotignum aminivorans	-0.138033	4.41694	-0.0202777	0.489063	0.526014	0.869318	0.589025	0.900716	0.900716		ALDEx2_t
0 mg/mL - 0.80 mg/mL	p__Firmicutes|c__Clostridia|o__Clostridiales|f__Clostridiaceae|g__Butyricicoccus|s__Butyricicoccus pullicaecorum	0.206474	4.47348	0.0376346	0.482813	0.561681	0.883869	0.592934	0.906279	0.906279		ALDEx2_t
0 mg/mL - 0.80 mg/mL	p__Firmicutes|c__Clostridia|o__Clostridiales|f__Lachnospiraceae|g__Lachnoclostridium|s__[Clostridium] scindens	0.463914	4.022	0.0875635	0.444618	0.526855	0.863647	0.550788	0.884162	0.884162		ALDEx2_t
0 mg/mL - 0.80 mg/mL	p__Firmicutes|c__Clostridia|o__Clostridiales|f__Ruminococcaceae|g__Negativibacillus|s__Negativibacillus massiliensis	-0.646203	3.84629	-0.13203	0.420313	0.544812	0.868055	0.535715	0.880433	0.880433		ALDEx2_t
0 mg/mL - 0.80 mg/mL	p__Firmicutes|c__Clostridia|o__Clostridiales|f__Ruminococcaceae|g__Papillibacter|s__Papillibacter cinnamivorans	-0.467138	3.81888	-0.103699	0.442188	0.506068	0.854387	0.519222	0.874499	0.874499		ALDEx2_t
0 mg/mL - 0.80 mg/mL	p__Firmicutes|c__Clostridia|o__Clostridiales|f__Lachnospiraceae|g__Marvinbryantia|s__Marvinbryantia formatexigens	0.43675	3.67326	0.0965612	0.4375	0.506178	0.856219	0.548466	0.888121	0.888121		ALDEx2_t
0 mg/mL - 0.80 mg/mL	p__Firmicutes|c__Clostridia|o__Clostridiales|f__Ruminococcaceae|g__Harryflintia|s__Harryflintia acetispora	-0.234644	4.37865	-0.0514995	0.470313	0.516696	0.870037	0.54244	0.884641	0.884641		ALDEx2_t
0 mg/mL - 0.80 mg/mL	p__Firmicutes|c__Clostridia|o__Clostridiales|f__|g__Monoglobus|s__Monoglobus pectinilyticus	0.395407	4.2286	0.0774595	0.455538	0.522431	0.866582	0.554941	0.882866	0.882866		ALDEx2_t
0 mg/mL - 0.80 mg/mL	p__Firmicutes|c__Clostridia|o__Clostridiales|f__Ruminococcaceae|g__|s__[Clostridium] viride	-0.138787	4.14366	-0.0245968	0.486739	0.539613	0.873489	0.570596	0.897044	0.897044		ALDEx2_t
0 mg/mL - 0.80 mg/mL	p__Firmicutes|c__Clostridia|o__Clostridiales|f__Peptostreptococcaceae|g__Romboutsia|s__Romboutsia timonensis	1.00865	4.34282	0.192588	0.396875	0.489884	0.847709	0.493999	0.858977	0.858977		ALDEx2_t
0 mg/mL - 0.80 mg/mL	p__Firmicutes|c__Clostridia|o__Clostridiales|f__|g__|s__Clostridiales bacterium CCNA10	-0.142496	4.20782	-0.0341099	0.48125	0.503998	0.853728	0.511987	0.878504	0.878504		ALDEx2_t
0 mg/mL - 0.80 mg/mL	p__Firmicutes|c__Clostridia|o__Clostridiales|f__Ruminococcaceae|g__Tepidibaculum|s__Tepidibaculum saccharolyticum	-0.0079241	4.49185	-0.00177012	0.49922	0.548408	0.870532	0.599115	0.905372	0.905372		ALDEx2_t
0 mg/mL - 0.80 mg/mL	p__Verrucomicrobia|c__Verrucomicrobiae|o__Verrucomicrobiales|f__Akkermansiaceae|g__Akkermansia|s__Akkermansia muciniphila	0.211404	4.43421	0.0410965	0.473438	0.532359	0.86204	0.564097	0.886445	0.886445		ALDEx2_t
1.60 mg/mL - 2.50 mg/mL	p__Firmicutes|c__Clostridia|o__Clostridiales|f__Lachnospiraceae|g__|s__Lachnospiraceae bacterium GAM79	-1.06314	1.55978	-0.652485	0.257813	0.0857074	0.759074	0.126893	0.784598	0.784598		ALDEx2_t
1.60 mg/mL - 2.50 mg/mL	p__Firmicutes|c__Clostridia|o__Clostridiales|f__Lachnospiraceae|g__Lacrimispora|s__Lacrimispora saccharolytica	-0.655177	1.81271	-0.301435	0.345029	0.64217	0.910462	0.350364	0.848209	0.848209		ALDEx2_t
1.60 mg/mL - 2.50 mg/mL	p__Firmicutes|c__Clostridia|o__Clostridiales|f__Lachnospiraceae|g__Eisenbergiella|s__Eisenbergiella massiliensis	-0.480269	1.84007	-0.294806	0.366472	0.482043	0.882098	0.415626	0.865558	0.865558		ALDEx2_t
1.60 mg/mL - 2.50 mg/mL	p__Firmicutes|c__Clostridia|o__Clostridiales|f__Clostridiaceae|g__Clostridium|s__Clostridium sp. BNL1100	-0.868168	1.93366	-0.307576	0.339181	0.638969	0.912852	0.307997	0.840052	0.840052		ALDEx2_t
1.60 mg/mL - 2.50 mg/mL	p__Firmicutes|c__Clostridia|o__Clostridiales|f__|g__Flintibacter|s__Flintibacter sp. KGMB00164	0.0503981	2.3119	0.0197318	0.486328	0.638575	0.91225	0.854836	0.967829	0.967829		ALDEx2_t
1.60 mg/mL - 2.50 mg/mL	p__Firmicutes|c__Clostridia|o__Clostridiales|f__Eubacteriaceae|g__Eubacterium|s__Eubacterium ventriosum	-1.20086	2.30924	-0.508086	0.294922	0.163378	0.788456	0.220719	0.814365	0.814365		ALDEx2_t
1.60 mg/mL - 2.50 mg/mL	p__Firmicutes|c__Clostridia|o__Clostridiales|f__Oscillospiraceae|g__Dysosmobacter|s__Dysosmobacter welbionis	0.272525	2.26484	0.0787433	0.451172	0.34902	0.84105	0.708212	0.934969	0.934969		ALDEx2_t
1.60 mg/mL - 2.50 mg/mL	p__Firmicutes|c__Clostridia|o__Clostridiales|f__Lachnospiraceae|g__Lacrimispora|s__Lacrimispora sphenoides	-0.300061	2.45154	-0.0767773	0.445313	0.563453	0.895112	0.759207	0.947434	0.947434		ALDEx2_t
1.60 mg/mL - 2.50 mg/mL	p__Firmicutes|c__Clostridia|o__Clostridiales|f__Lachnospiraceae|g__Anaerotaenia|s__Anaerotaenia torta	-0.647224	2.08638	-0.25216	0.376953	0.575666	0.894325	0.451153	0.870494	0.870494		ALDEx2_t
1.60 mg/mL - 2.50 mg/mL	p__Firmicutes|c__Clostridia|o__Clostridiales|f__Ruminococcaceae|g__Flavonifractor|s__Flavonifractor plautii	0.87892	3.44518	0.234167	0.378906	0.231158	0.814633	0.466486	0.878733	0.878733		ALDEx2_t
1.60 mg/mL - 2.50 mg/mL	p__Firmicutes|c__Clostridia|o__Clostridiales|f__Clostridiaceae|g__Hungatella|s__Hungatella hathewayi	0.199681	2.34117	0.0811418	0.475634	0.820269	0.950519	0.8065	0.953459	0.953459		ALDEx2_t
1.60 mg/mL - 2.50 mg/mL	p__Firmicutes|c__Clostridia|o__Clostridiales|f__Lachnospiraceae|g__Kineothrix|s__Kineothrix alysoides	-0.694838	1.74407	-0.374906	0.369141	0.329791	0.835139	0.372372	0.853476	0.853476		ALDEx2_t
1.60 mg/mL - 2.50 mg/mL	p__Bacteroidetes|c__Bacteroidia|o__Bacteroidales|f__Muribaculaceae|g__Muribaculum|s__Muribaculum intestinale	0.655757	6.19583	0.100806	0.441406	0.730694	0.930328	0.764224	0.95023	0.95023		ALDEx2_t
1.60 mg/mL - 2.50 mg/mL	p__Firmicutes|c__Clostridia|o__Clostridiales|f__Eubacteriaceae|g__Eubacterium|s__Eubacterium coprostanoligenes	1.96286	5.20423	0.359736	0.355469	0.266947	0.819489	0.374489	0.859204	0.859204		ALDEx2_t
1.60 mg/mL - 2.50 mg/mL	p__Firmicutes|c__Clostridia|o__Clostridiales|f__Lachnospiraceae|g__Lachnoclostridium|s__Lachnoclostridium phytofermentans	-0.589593	2.26258	-0.171661	0.409357	0.786528	0.945105	0.525177	0.89325	0.89325		ALDEx2_t
1.60 mg/mL - 2.50 mg/mL	p__Firmicutes|c__Clostridia|o__Clostridiales|f__Ruminococcaceae|g__Anaerotruncus|s__Anaerotruncus rubiinfantis	0.172397	1.90186	0.0783779	0.465887	0.558505	0.890875	0.807672	0.955893	0.955893		ALDEx2_t
1.60 mg/mL - 2.50 mg/mL	p__Firmicutes|c__Clostridia|o__Clostridiales|f__Peptostreptococcaceae|g__Romboutsia|s__Romboutsia ilealis	0.344205	5.75838	0.0569965	0.474609	0.711402	0.925393	0.795234	0.952678	0.952678		ALDEx2_t
1.60 mg/mL - 2.50 mg/mL	p__Firmicutes|c__Clostridia|o__Clostridiales|f__Ruminococcaceae|g__|s__[Eubacterium] siraeum	-1.93777	4.23786	-0.422677	0.325536	0.337495	0.833325	0.301028	0.838517	0.838517		ALDEx2_t
1.60 mg/mL - 2.50 mg/mL	p__Bacteroidetes|c__Bacteroidia|o__Bacteroidales|f__Rikenellaceae|g__Alistipes|s__Alistipes dispar	-2.25499	6.3092	-0.348715	0.341131	0.378505	0.84332	0.370049	0.85034	0.85034		ALDEx2_t
1.60 mg/mL - 2.50 mg/mL	p__Firmicutes|c__Clostridia|o__Clostridiales|f__Ruminococcaceae|g__Phocea|s__Phocea massiliensis	0.46476	2.36751	0.185276	0.393762	0.285723	0.828946	0.503589	0.887305	0.887305		ALDEx2_t
1.60 mg/mL - 2.50 mg/mL	p__Firmicutes|c__Clostridia|o__Clostridiales|f__Christensenellaceae|g__Christensenella|s__Christensenella minuta	-1.17277	3.91157	-0.269421	0.394531	0.470033	0.864269	0.4176	0.862615	0.862615		ALDEx2_t
1.60 mg/mL - 2.50 mg/mL	p__Firmicutes|c__Clostridia|o__Clostridiales|f__Oscillospiraceae|g__Oscillibacter|s__Oscillibacter valericigenes	1.63229	2.50304	0.532986	0.322266	0.128516	0.779755	0.262092	0.833397	0.833397		ALDEx2_t
1.60 mg/mL - 2.50 mg/mL	p__Bacteroidetes|c__Bacteroidia|o__Bacteroidales|f__Rikenellaceae|g__Alistipes|s__Alistipes senegalensis	-0.881396	6.43092	-0.127676	0.448343	0.672614	0.919267	0.677128	0.93089	0.93089		ALDEx2_t
1.60 mg/mL - 2.50 mg/mL	p__Firmicutes|c__Clostridia|o__Clostridiales|f__Lachnospiraceae|g__Herbinix|s__Herbinix luporum	-0.766123	2.20826	-0.324565	0.347656	0.40824	0.856313	0.375422	0.855269	0.855269		ALDEx2_t
1.60 mg/mL - 2.50 mg/mL	p__Firmicutes|c__Clostridia|o__Clostridiales|f__Hungateiclostridiaceae|g__Hungateiclostridium|s__Hungateiclostridium alkalicellulosi	-1.79528	3.53066	-0.403245	0.311891	0.401959	0.847787	0.236118	0.810504	0.810504		ALDEx2_t
1.60 mg/mL - 2.50 mg/mL	p__Firmicutes|c__Clostridia|o__Clostridiales|f__Eubacteriaceae|g__Eubacterium|s__Eubacterium xylanophilum	-1.81823	3.06889	-0.470643	0.23002	0.316671	0.818708	0.0788182	0.740085	0.740085		ALDEx2_t
1.60 mg/mL - 2.50 mg/mL	p__Firmicutes|c__Clostridia|o__Clostridiales|f__Hungateiclostridiaceae|g__Hungateiclostridium|s__Hungateiclostridium aldrichii	-1.74924	3.87627	-0.340402	0.324219	0.522974	0.88242	0.309494	0.838738	0.838738		ALDEx2_t
1.60 mg/mL - 2.50 mg/mL	p__Firmicutes|c__Clostridia|o__Clostridiales|f__Hungateiclostridiaceae|g__Pseudoclostridium|s__Pseudoclostridium thermosuccinogenes	-2.14115	4.41355	-0.374297	0.31384	0.464508	0.861488	0.259742	0.814044	0.814044		ALDEx2_t
1.60 mg/mL - 2.50 mg/mL	p__Firmicutes|c__Clostridia|o__Clostridiales|f__Lachnospiraceae|g__Acetatifactor|s__Acetatifactor muris	1.41854	4.05544	0.285427	0.374269	0.226477	0.805686	0.410538	0.861714	0.861714		ALDEx2_t
1.60 mg/mL - 2.50 mg/mL	p__Firmicutes|c__Clostridia|o__Clostridiales|f__Lachnospiraceae|g__Blautia|s__Blautia producta	-0.562305	2.86278	-0.156575	0.401559	0.581498	0.893359	0.563044	0.896974	0.896974		ALDEx2_t
1.60 mg/mL - 2.50 mg/mL	p__Firmicutes|c__Clostridia|o__Clostridiales|f__Lachnospiraceae|g__Blautia|s__Blautia sp. YL58	0.0420488	2.7	0.012295	0.495127	0.535654	0.877891	0.802468	0.955374	0.955374		ALDEx2_t
1.60 mg/mL - 2.50 mg/mL	p__Firmicutes|c__Clostridia|o__Clostridiales|f__Lachnospiraceae|g__Faecalimonas|s__Faecalimonas umbilicata	0.16098	3.13063	0.0466043	0.481481	0.579579	0.894987	0.845559	0.966586	0.966586		ALDEx2_t
1.60 mg/mL - 2.50 mg/mL	p__Firmicutes|c__Clostridia|o__Clostridiales|f__Lachnospiraceae|g__Lachnoclostridium|s__Lachnoclostridium sp. YL32	0.300162	2.6215	0.0707797	0.447266	0.626617	0.906415	0.755858	0.945206	0.945206		ALDEx2_t
1.60 mg/mL - 2.50 mg/mL	p__Firmicutes|c__Clostridia|o__Clostridiales|f__Ruminococcaceae|g__Anaeromassilibacillus|s__Anaeromassilibacillus senegalensis	-2.13195	5.34871	-0.387924	0.327485	0.300904	0.825038	0.336084	0.83844	0.83844		ALDEx2_t
1.60 mg/mL - 2.50 mg/mL	p__Bacteroidetes|c__Bacteroidia|o__Bacteroidales|f__Muribaculaceae|g__Duncaniella|s__Duncaniella sp. B8	2.06526	5.90159	0.306779	0.37037	0.479337	0.86801	0.430506	0.863413	0.863413		ALDEx2_t
1.60 mg/mL - 2.50 mg/mL	p__Firmicutes|c__Clostridia|o__Clostridiales|f__Christensenellaceae|g__Christensenella|s__Christensenella massiliensis	-0.754365	3.94518	-0.158781	0.410156	0.637221	0.907189	0.561503	0.900085	0.900085		ALDEx2_t
1.60 mg/mL - 2.50 mg/mL	p__Candidatus Melainabacteria|c__|o__Vampirovibrionales|f__|g__Vampirovibrio|s__Vampirovibrio chlorellavorus	-0.602047	7.12524	-0.0792307	0.460938	0.664456	0.914607	0.630299	0.912503	0.912503		ALDEx2_t
1.60 mg/mL - 2.50 mg/mL	p__Firmicutes|c__Clostridia|o__Clostridiales|f__Lachnospiraceae|g__Butyrivibrio|s__Butyrivibrio crossotus	-0.362443	2.68836	-0.129369	0.447266	0.706073	0.920689	0.754043	0.943347	0.943347		ALDEx2_t
1.60 mg/mL - 2.50 mg/mL	p__Bacteroidetes|c__Bacteroidia|o__Bacteroidales|f__Rikenellaceae|g__Alistipes|s__Alistipes communis	-0.85251	7.1995	-0.107607	0.438597	0.607035	0.901671	0.626186	0.915815	0.915815		ALDEx2_t
1.60 mg/mL - 2.50 mg/mL	p__Firmicutes|c__Bacilli|o__Lactobacillales|f__Lactobacillaceae|g__Lactobacillus|s__Lactobacillus johnsonii	-1.29371	4.95352	-0.249439	0.382813	0.447957	0.867259	0.492399	0.87986	0.87986		ALDEx2_t
1.60 mg/mL - 2.50 mg/mL	p__Firmicutes|c__Clostridia|o__Clostridiales|f__Hungateiclostridiaceae|g__Hungateiclostridium|s__Hungateiclostridium saccincola	-1.8633	3.09627	-0.486769	0.220273	0.27679	0.805903	0.0925687	0.750202	0.750202		ALDEx2_t
1.60 mg/mL - 2.50 mg/mL	p__Firmicutes|c__Clostridia|o__Clostridiales|f__Lachnospiraceae|g__Enterocloster|s__Enterocloster bolteae	0.486452	2.36162	0.153036	0.417154	0.468971	0.867846	0.617313	0.911708	0.911708		ALDEx2_t
1.60 mg/mL - 2.50 mg/mL	p__Bacteroidetes|c__Bacteroidia|o__Bacteroidales|f__Rikenellaceae|g__Alistipes|s__Alistipes finegoldii	-0.878137	6.20601	-0.147818	0.441406	0.63254	0.909073	0.623039	0.911577	0.911577		ALDEx2_t
1.60 mg/mL - 2.50 mg/mL	p__Firmicutes|c__Clostridia|o__Clostridiales|f__Lachnospiraceae|g__Eisenbergiella|s__Eisenbergiella tayi	-0.1946	4.03734	-0.0442858	0.480469	0.674442	0.91331	0.779219	0.949959	0.949959		ALDEx2_t
1.60 mg/mL - 2.50 mg/mL	p__Firmicutes|c__Clostridia|o__Clostridiales|f__Clostridiaceae|g__Clostridium|s__Clostridium sp. SY8519	-0.143398	4.61282	-0.0254443	0.492188	0.648433	0.91151	0.755227	0.945896	0.945896		ALDEx2_t
1.60 mg/mL - 2.50 mg/mL	p__Firmicutes|c__Clostridia|o__Clostridiales|f__Ruminococcaceae|g__Paludicola|s__Paludicola psychrotolerans	0.40592	3.71822	0.0876644	0.45809	0.571472	0.891835	0.697145	0.930846	0.930846		ALDEx2_t
1.60 mg/mL - 2.50 mg/mL	p__Firmicutes|c__Clostridia|o__Clostridiales|f__Ruminococcaceae|g__Ruminococcus|s__Ruminococcus champanellensis	-3.14665	5.53177	-0.55748	0.300195	0.19706	0.772059	0.235317	0.804021	0.804021		ALDEx2_t
1.60 mg/mL - 2.50 mg/mL	p__Firmicutes|c__Clostridia|o__Clostridiales|f__Lachnospiraceae|g__Anaerocolumna|s__Anaerocolumna cellulosilytica	-0.0473211	3.73409	-0.0131576	0.493177	0.640898	0.910625	0.747011	0.94324	0.94324		ALDEx2_t
1.60 mg/mL - 2.50 mg/mL	p__Firmicutes|c__Clostridia|o__Clostridiales|f__Hungateiclostridiaceae|g__Hungateiclostridium|s__Hungateiclostridium cellulolyticum	-1.51167	4.46961	-0.292812	0.365234	0.420403	0.85247	0.417701	0.857735	0.857735		ALDEx2_t
1.60 mg/mL - 2.50 mg/mL	p__Firmicutes|c__Clostridia|o__Clostridiales|f__Hungateiclostridiaceae|g__Ruminiclostridium|s__Ruminiclostridium cellobioparum	-2.68952	3.88424	-0.629463	0.239766	0.213773	0.772694	0.125512	0.739735	0.739735		ALDEx2_t
1.60 mg/mL - 2.50 mg/mL	p__Firmicutes|c__Clostridia|o__Clostridiales|f__Lachnospiraceae|g__Mediterraneibacter|s__[Ruminococcus] gnavus	-1.03125	3.82871	-0.231771	0.384766	0.520572	0.877954	0.502285	0.883806	0.883806		ALDEx2_t
1.60 mg/mL - 2.50 mg/mL	p__Firmicutes|c__Clostridia|o__Clostridiales|f__Ruminococcaceae|g__Pseudoflavonifractor|s__Pseudoflavonifractor capillosus	-0.544942	4.16534	-0.10568	0.436647	0.666335	0.920494	0.683532	0.926281	0.926281		ALDEx2_t
1.60 mg/mL - 2.50 mg/mL	p__Firmicutes|c__Clostridia|o__Clostridiales|f__Lachnospiraceae|g__Lacrimispora|s__Lacrimispora indolis	1.06979	3.36722	0.293912	0.34308	0.321626	0.830741	0.377128	0.850261	0.850261		ALDEx2_t
1.60 mg/mL - 2.50 mg/mL	p__Bacteroidetes|c__Bacteroidia|o__Bacteroidales|f__Rikenellaceae|g__Alistipes|s__Alistipes onderdonkii	-0.187742	6.37836	-0.0335138	0.483431	0.628271	0.908459	0.65201	0.919981	0.919981		ALDEx2_t
1.60 mg/mL - 2.50 mg/mL	p__Firmicutes|c__Clostridia|o__Clostridiales|f__Oscillospiraceae|g__Oscillibacter|s__Oscillibacter sp. PEA192	1.45618	3.62787	0.321144	0.316406	0.273092	0.813349	0.328773	0.82734	0.82734		ALDEx2_t
1.60 mg/mL - 2.50 mg/mL	p__Firmicutes|c__Clostridia|o__Clostridiales|f__Peptostreptococcaceae|g__Romboutsia|s__Romboutsia timonensis	-0.135804	5.45341	-0.0190107	0.487329	0.572453	0.892888	0.630756	0.912123	0.912123		ALDEx2_t
1.60 mg/mL - 2.50 mg/mL	p__Firmicutes|c__Clostridia|o__Clostridiales|f__Clostridiaceae|g__Geosporobacter|s__Geosporobacter ferrireducens	-0.189824	5.06744	-0.039423	0.483431	0.635678	0.90614	0.732456	0.934877	0.934877		ALDEx2_t
1.60 mg/mL - 2.50 mg/mL	p__Firmicutes|c__Clostridia|o__Clostridiales|f__Catabacteriaceae|g__Catabacter|s__Catabacter hongkongensis	1.18171	4.06173	0.256149	0.367188	0.479696	0.875396	0.487016	0.877833	0.877833		ALDEx2_t
1.60 mg/mL - 2.50 mg/mL	p__Firmicutes|c__Clostridia|o__Clostridiales|f__Lachnospiraceae|g__Faecalicatena|s__Faecalicatena orotica	0.786034	3.21579	0.206952	0.407407	0.443333	0.86385	0.568215	0.901731	0.901731		ALDEx2_t
1.60 mg/mL - 2.50 mg/mL	p__Firmicutes|c__Clostridia|o__Clostridiales|f__Ruminococcaceae|g__Pseudoflavonifractor|s__Pseudoflavonifractor phocaeensis	1.9854	3.3412	0.530673	0.249513	0.138062	0.760132	0.13556	0.741863	0.741863		ALDEx2_t
1.60 mg/mL - 2.50 mg/mL	p__Firmicutes|c__Clostridia|o__Clostridiales|f__Ruminococcaceae|g__Acetivibrio|s__Acetivibrio ethanolgignens	1.66641	3.3313	0.403423	0.274854	0.202628	0.788805	0.181785	0.774739	0.774739		ALDEx2_t
1.60 mg/mL - 2.50 mg/mL	p__Bacteroidetes|c__Bacteroidia|o__Bacteroidales|f__Rikenellaceae|g__Alistipes|s__Alistipes putredinis	-1.53665	5.41908	-0.22846	0.395712	0.544146	0.883105	0.546979	0.888522	0.888522		ALDEx2_t
1.60 mg/mL - 2.50 mg/mL	p__Firmicutes|c__Clostridia|o__Clostridiales|f__Lachnospiraceae|g__Lachnospira|s__Lachnospira eligens	-0.272092	3.51807	-0.0637337	0.458984	0.598364	0.892164	0.676017	0.920929	0.920929		ALDEx2_t
1.60 mg/mL - 2.50 mg/mL	p__Firmicutes|c__Clostridia|o__Clostridiales|f__Lachnospiraceae|g__Roseburia|s__Roseburia intestinalis	0.303636	4.12347	0.0586133	0.469786	0.539815	0.883137	0.666963	0.927704	0.927704		ALDEx2_t
1.60 mg/mL - 2.50 mg/mL	p__Firmicutes|c__Clostridia|o__Clostridiales|f__Lachnospiraceae|g__|s__Lachnospiraceae bacterium Choco86	0.0913493	4.92793	0.0174885	0.488281	0.648997	0.914021	0.752724	0.942008	0.942008		ALDEx2_t
1.60 mg/mL - 2.50 mg/mL	p__Firmicutes|c__Clostridia|o__Clostridiales|f__Lachnospiraceae|g__Robinsoniella|s__Robinsoniella peoriensis	0.732952	3.72985	0.1603	0.424951	0.492415	0.876571	0.561014	0.902078	0.902078		ALDEx2_t
1.60 mg/mL - 2.50 mg/mL	p__Firmicutes|c__Clostridia|o__Clostridiales|f__Ruminococcaceae|g__Ruminococcus|s__Ruminococcus bicirculans	-1.79895	4.86309	-0.356779	0.332031	0.40133	0.836848	0.392938	0.851432	0.851432		ALDEx2_t
1.60 mg/mL - 2.50 mg/mL	p__Firmicutes|c__Bacilli|o__Lactobacillales|f__Lactobacillaceae|g__Lactobacillus|s__Lactobacillus animalis	2.05403	4.90678	0.3734	0.339181	0.3416	0.809713	0.392574	0.83522	0.83522		ALDEx2_t
1.60 mg/mL - 2.50 mg/mL	p__Firmicutes|c__Clostridia|o__Clostridiales|f__Lachnospiraceae|g__Blautia|s__Blautia sp. SC05B48	-0.390238	3.02604	-0.0971845	0.448343	0.655372	0.912642	0.684186	0.923038	0.923038		ALDEx2_t
1.60 mg/mL - 2.50 mg/mL	p__Firmicutes|c__Clostridia|o__Clostridiales|f__Lachnospiraceae|g__Lacrimispora|s__Lacrimispora celerecrescens	0.71156	3.67195	0.170285	0.414063	0.488887	0.872528	0.595467	0.908021	0.908021		ALDEx2_t
1.60 mg/mL - 2.50 mg/mL	p__Firmicutes|c__Clostridia|o__Clostridiales|f__Lachnospiraceae|g__Lachnoclostridium|s__[Clostridium] polysaccharolyticum	1.38808	3.44583	0.379332	0.325536	0.348223	0.839583	0.318899	0.832554	0.832554		ALDEx2_t
1.60 mg/mL - 2.50 mg/mL	p__Firmicutes|c__Clostridia|o__Clostridiales|f__Lachnospiraceae|g__Parasporobacterium|s__Parasporobacterium paucivorans	1.16349	3.97227	0.253373	0.347656	0.417333	0.851635	0.383413	0.84106	0.84106		ALDEx2_t
1.60 mg/mL - 2.50 mg/mL	p__Firmicutes|c__Clostridia|o__Clostridiales|f__Lachnospiraceae|g__Anaerostipes|s__Anaerostipes hadrus	1.40917	3.41294	0.362574	0.333333	0.293377	0.819594	0.341083	0.838143	0.838143		ALDEx2_t
1.60 mg/mL - 2.50 mg/mL	p__Firmicutes|c__Clostridia|o__Clostridiales|f__Lachnospiraceae|g__Lachnoclostridium|s__[Clostridium] populeti	-0.435646	3.14664	-0.10132	0.42885	0.613286	0.895534	0.591086	0.901094	0.901094		ALDEx2_t
1.60 mg/mL - 2.50 mg/mL	p__Bacteroidetes|c__Bacteroidia|o__Bacteroidales|f__Rikenellaceae|g__Alistipes|s__Alistipes megaguti	-1.61065	5.46781	-0.275547	0.374269	0.464146	0.858241	0.449331	0.860732	0.860732		ALDEx2_t
1.60 mg/mL - 2.50 mg/mL	p__Firmicutes|c__Clostridia|o__Clostridiales|f__|g__Intestinimonas|s__Intestinimonas butyriciproducens	1.92492	3.36925	0.515809	0.253411	0.167095	0.76567	0.171451	0.764132	0.764132		ALDEx2_t
1.60 mg/mL - 2.50 mg/mL	p__Firmicutes|c__Clostridia|o__Clostridiales|f__Clostridiaceae|g__Clostridium|s__Clostridium botulinum	-1.32874	4.95444	-0.245855	0.391813	0.521196	0.87206	0.519656	0.883076	0.883076		ALDEx2_t
1.60 mg/mL - 2.50 mg/mL	p__Firmicutes|c__Erysipelotrichia|o__Erysipelotrichales|f__Erysipelotrichaceae|g__Breznakia|s__Breznakia pachnodae	-0.0507296	4.44176	-0.00747337	0.494141	0.592816	0.899195	0.632732	0.918709	0.918709		ALDEx2_t
1.60 mg/mL - 2.50 mg/mL	p__Firmicutes|c__Clostridia|o__Clostridiales|f__Lachnospiraceae|g__Lacrimispora|s__Lacrimispora amygdalina	1.83336	3.44552	0.45525	0.271484	0.214764	0.785349	0.201119	0.776692	0.776692		ALDEx2_t
1.60 mg/mL - 2.50 mg/mL	p__Firmicutes|c__Clostridia|o__Clostridiales|f__Clostridiaceae|g__Clostridium|s__Clostridium merdae	-1.52379	5.27394	-0.26317	0.384766	0.423076	0.846762	0.43905	0.860158	0.860158		ALDEx2_t
1.60 mg/mL - 2.50 mg/mL	p__Firmicutes|c__Clostridia|o__Clostridiales|f__|g__Colidextribacter|s__Colidextribacter massiliensis	0.0733661	3.73793	0.01725	0.495127	0.582893	0.89569	0.689186	0.928036	0.928036		ALDEx2_t
1.60 mg/mL - 2.50 mg/mL	p__Firmicutes|c__Clostridia|o__Clostridiales|f__Lachnospiraceae|g__Schaedlerella|s__Schaedlerella arabinosiphila	0.675076	3.71651	0.152047	0.419922	0.466406	0.8693	0.551726	0.895721	0.895721		ALDEx2_t
1.60 mg/mL - 2.50 mg/mL	p__Firmicutes|c__Erysipelotrichia|o__Erysipelotrichales|f__Erysipelotrichaceae|g__Turicibacter|s__Turicibacter sp. H121	-2.0705	5.10843	-0.387592	0.337891	0.300032	0.810872	0.323289	0.816743	0.816743		ALDEx2_t
1.60 mg/mL - 2.50 mg/mL	p__Firmicutes|c__Clostridia|o__Clostridiales|f__Hungateiclostridiaceae|g__Ruminiclostridium|s__Ruminiclostridium cellulolyticum	-1.00186	4.74597	-0.168656	0.423002	0.527214	0.877962	0.602814	0.908808	0.908808		ALDEx2_t
1.60 mg/mL - 2.50 mg/mL	p__Firmicutes|c__Clostridia|o__Clostridiales|f__Lachnospiraceae|g__Anaerotignum|s__Anaerotignum lactatifermentans	0.114724	3.69036	0.0252709	0.481481	0.573598	0.892514	0.604026	0.90443	0.90443		ALDEx2_t
1.60 mg/mL - 2.50 mg/mL	p__Firmicutes|c__Clostridia|o__Clostridiales|f__Hungateiclostridiaceae|g__Anaerobacterium|s__Anaerobacterium chartisolvens	0.166305	3.79216	0.037727	0.477583	0.579927	0.892823	0.60772	0.905047	0.905047		ALDEx2_t
1.60 mg/mL - 2.50 mg/mL	p__Firmicutes|c__Clostridia|o__Clostridiales|f__Ruminococcaceae|g__Hydrogenoanaerobacterium|s__Hydrogenoanaerobacterium saccharovorans	1.42199	3.79359	0.352087	0.341131	0.396607	0.835642	0.379345	0.841511	0.841511		ALDEx2_t
1.60 mg/mL - 2.50 mg/mL	p__Firmicutes|c__Clostridia|o__Clostridiales|f__Ruminococcaceae|g__|s__[Clostridium] methylpentosum	1.08103	3.93989	0.24387	0.371094	0.463532	0.861127	0.445628	0.862296	0.862296		ALDEx2_t
1.60 mg/mL - 2.50 mg/mL	p__Verrucomicrobia|c__Verrucomicrobiae|o__Verrucomicrobiales|f__Akkermansiaceae|g__Akkermansia|s__Akkermansia muciniphila	0.732945	4.73638	0.141362	0.426901	0.526732	0.883313	0.534538	0.886934	0.886934		ALDEx2_t
1.60 mg/mL - 2.50 mg/mL	p__Firmicutes|c__Clostridia|o__Clostridiales|f__Ruminococcaceae|g__Negativibacillus|s__Negativibacillus massiliensis	1.87561	3.67355	0.464922	0.298246	0.265411	0.800225	0.234047	0.790569	0.790569		ALDEx2_t
1.60 mg/mL - 2.50 mg/mL	p__Firmicutes|c__Clostridia|o__Clostridiales|f__Lachnospiraceae|g__Anaerostipes|s__Anaerostipes butyraticus	-0.95705	3.34895	-0.204597	0.394531	0.48657	0.874053	0.512053	0.881794	0.881794		ALDEx2_t
1.60 mg/mL - 2.50 mg/mL	p__Firmicutes|c__Clostridia|o__Clostridiales|f__Clostridiaceae|g__Falcatimonas|s__Falcatimonas natans	0.912397	3.95375	0.203638	0.403509	0.486305	0.861163	0.481097	0.863134	0.863134		ALDEx2_t
1.60 mg/mL - 2.50 mg/mL	p__Firmicutes|c__Clostridia|o__Clostridiales|f__Eubacteriaceae|g__Eubacterium|s__Eubacterium oxidoreducens	-0.219173	4.12497	-0.0483934	0.473684	0.58829	0.894492	0.657231	0.920593	0.920593		ALDEx2_t
1.60 mg/mL - 2.50 mg/mL	p__Firmicutes|c__Clostridia|o__Clostridiales|f__Ruminococcaceae|g__Acutalibacter|s__Acutalibacter muris	1.64814	4.11339	0.355643	0.314453	0.336802	0.813003	0.321378	0.810893	0.810893		ALDEx2_t
1.60 mg/mL - 2.50 mg/mL	p__Firmicutes|c__Clostridia|o__Clostridiales|f__Clostridiaceae|g__Clostridium|s__Clostridium sp. JN-9	-1.5874	4.85789	-0.265095	0.378168	0.389174	0.835909	0.401822	0.842323	0.842323		ALDEx2_t
1.60 mg/mL - 2.50 mg/mL	p__Firmicutes|c__Clostridia|o__Clostridiales|f__Clostridiaceae|g__Clostridium|s__Clostridium tarantellae	-0.235052	4.87894	-0.0454698	0.476563	0.594481	0.894497	0.652802	0.915406	0.915406		ALDEx2_t
1.60 mg/mL - 2.50 mg/mL	p__Firmicutes|c__Clostridia|o__Clostridiales|f__Lachnospiraceae|g__Faecalicatena|s__Faecalicatena contorta	1.47187	3.81121	0.331117	0.316406	0.365721	0.826375	0.325018	0.810597	0.810597		ALDEx2_t
1.60 mg/mL - 2.50 mg/mL	p__Firmicutes|c__Clostridia|o__Clostridiales|f__|g__Ihubacter|s__Ihubacter massiliensis	0.0789198	4.08929	0.013539	0.490234	0.590909	0.894852	0.648527	0.91697	0.91697		ALDEx2_t
1.60 mg/mL - 2.50 mg/mL	p__Tenericutes|c__Mollicutes|o__Entomoplasmatales|f__Spiroplasmataceae|g__Spiroplasma|s__Spiroplasma syrphidicola	-1.83988	4.62449	-0.354776	0.328125	0.35842	0.827987	0.384519	0.839812	0.839812		ALDEx2_t
1.60 mg/mL - 2.50 mg/mL	p__Firmicutes|c__Clostridia|o__Clostridiales|f__Lachnospiraceae|g__Lacrimispora|s__Lacrimispora algidixylanolytica	-0.825842	3.32675	-0.218	0.374269	0.454971	0.859574	0.43671	0.859413	0.859413		ALDEx2_t
1.60 mg/mL - 2.50 mg/mL	p__Firmicutes|c__Clostridia|o__Clostridiales|f__|g__Monoglobus|s__Monoglobus pectinilyticus	-1.5982	4.54668	-0.296616	0.37232	0.409694	0.840253	0.43822	0.858073	0.858073		ALDEx2_t
1.60 mg/mL - 2.50 mg/mL	p__Firmicutes|c__Clostridia|o__Clostridiales|f__Christensenellaceae|g__Christensenella|s__Christensenella timonensis	-2.60927	4.51338	-0.505835	0.278753	0.259519	0.765727	0.236143	0.766179	0.766179		ALDEx2_t
1.60 mg/mL - 2.50 mg/mL	p__Firmicutes|c__Clostridia|o__Clostridiales|f__Clostridiaceae|g__Clostridium|s__Clostridium disporicum	1.5687	3.66625	0.351717	0.325536	0.361444	0.824164	0.351289	0.817275	0.817275		ALDEx2_t
1.60 mg/mL - 2.50 mg/mL	p__Firmicutes|c__Clostridia|o__Clostridiales|f__Clostridiaceae|g__Clostridium|s__Clostridium saudiense	0.482611	4.04766	0.0959317	0.425781	0.589925	0.897902	0.626314	0.91629	0.91629		ALDEx2_t
1.60 mg/mL - 2.50 mg/mL	p__Firmicutes|c__Clostridia|o__Clostridiales|f__Lachnospiraceae|g__Anaerotignum|s__Anaerotignum aminivorans	0.84106	4.19603	0.169159	0.407407	0.500249	0.870841	0.524416	0.884553	0.884553		ALDEx2_t
1.60 mg/mL - 2.50 mg/mL	p__Firmicutes|c__Clostridia|o__Clostridiales|f__Lachnospiraceae|g__Lachnoclostridium|s__[Clostridium] scindens	1.27867	3.72374	0.282762	0.352827	0.409295	0.852128	0.387391	0.841346	0.841346		ALDEx2_t
1.60 mg/mL - 2.50 mg/mL	p__Firmicutes|c__Clostridia|o__Clostridiales|f__Lachnospiraceae|g__Anaerocolumna|s__Anaerocolumna xylanovorans	1.37767	4.7287	0.243246	0.376953	0.445154	0.852129	0.47358	0.864808	0.864808		ALDEx2_t
1.60 mg/mL - 2.50 mg/mL	p__Firmicutes|c__Clostridia|o__Clostridiales|f__Lachnospiraceae|g__Anaerostipes|s__Anaerostipes rhamnosivorans	1.39731	3.96818	0.3042	0.333333	0.384406	0.823108	0.386552	0.828085	0.828085		ALDEx2_t
1.60 mg/mL - 2.50 mg/mL	p__Firmicutes|c__Clostridia|o__Clostridiales|f__Lachnospiraceae|g__Marvinbryantia|s__Marvinbryantia formatexigens	0.963901	3.90633	0.201022	0.390625	0.489395	0.86478	0.465447	0.867184	0.867184		ALDEx2_t
1.60 mg/mL - 2.50 mg/mL	p__Firmicutes|c__Clostridia|o__Clostridiales|f__Ruminococcaceae|g__|s__[Clostridium] viride	0.7732	3.93077	0.172266	0.407407	0.449673	0.85501	0.482483	0.871923	0.871923		ALDEx2_t
1.60 mg/mL - 2.50 mg/mL	p__Firmicutes|c__Erysipelotrichia|o__Erysipelotrichales|f__Erysipelotrichaceae|g__Faecalitalea|s__Faecalitalea cylindroides	-1.33122	4.46393	-0.262911	0.361328	0.419076	0.839647	0.449805	0.852003	0.852003		ALDEx2_t
1.60 mg/mL - 2.50 mg/mL	p__Tenericutes|c__Mollicutes|o__Entomoplasmatales|f__Spiroplasmataceae|g__Spiroplasma|s__Spiroplasma chrysopicola	-0.890409	4.40659	-0.178441	0.404297	0.48209	0.866059	0.518845	0.884008	0.884008		ALDEx2_t
1.60 mg/mL - 2.50 mg/mL	p__Tenericutes|c__Mollicutes|o__Entomoplasmatales|f__Spiroplasmataceae|g__Spiroplasma|s__Spiroplasma lampyridicola	-0.746847	4.89408	-0.132988	0.438597	0.485279	0.864296	0.511793	0.87784	0.87784		ALDEx2_t
1.60 mg/mL - 2.50 mg/mL	p__Firmicutes|c__Clostridia|o__Clostridiales|f__Lachnospiraceae|g__Anaerobutyricum|s__Anaerobutyricum hallii	1.23836	3.9796	0.271523	0.362573	0.400624	0.843475	0.39801	0.849886	0.849886		ALDEx2_t
1.60 mg/mL - 2.50 mg/mL	p__Firmicutes|c__Bacilli|o__Lactobacillales|f__Lactobacillaceae|g__Lactobacillus|s__Lactobacillus rogosae	0.155901	4.16272	0.0363663	0.48538	0.567328	0.889654	0.619999	0.909005	0.909005		ALDEx2_t
1.60 mg/mL - 2.50 mg/mL	p__Firmicutes|c__Clostridia|o__Clostridiales|f__Hungateiclostridiaceae|g__Hungateiclostridium|s__Hungateiclostridium straminisolvens	-0.660019	3.70723	-0.129926	0.421875	0.532379	0.876102	0.531949	0.875013	0.875013		ALDEx2_t
1.60 mg/mL - 2.50 mg/mL	p__Firmicutes|c__Clostridia|o__Clostridiales|f__Ruminococcaceae|g__Faecalibacterium|s__Faecalibacterium prausnitzii	-1.78906	4.30537	-0.3268	0.335283	0.365408	0.825299	0.378061	0.820289	0.820289		ALDEx2_t
1.60 mg/mL - 2.50 mg/mL	p__Firmicutes|c__Clostridia|o__Clostridiales|f__Hungateiclostridiaceae|g__Hungateiclostridium|s__Hungateiclostridium clariflavum	-1.15067	4.32679	-0.220142	0.376953	0.479059	0.856481	0.470412	0.858148	0.858148		ALDEx2_t
1.60 mg/mL - 2.50 mg/mL	p__Firmicutes|c__Clostridia|o__Clostridiales|f__Hungateiclostridiaceae|g__|s__Hungateiclostridiaceae bacterium KB18	-0.126069	4.51444	-0.0230665	0.488281	0.489668	0.86995	0.546239	0.8961	0.8961		ALDEx2_t
1.60 mg/mL - 2.50 mg/mL	p__Firmicutes|c__Clostridia|o__Clostridiales|f__Ruminococcaceae|g__Caproiciproducens|s__Caproiciproducens galactitolivorans	-0.788835	4.84474	-0.143203	0.421875	0.483193	0.869471	0.518354	0.889491	0.889491		ALDEx2_t
1.60 mg/mL - 2.50 mg/mL	p__Firmicutes|c__Clostridia|o__Clostridiales|f__Ruminococcaceae|g__Tepidibaculum|s__Tepidibaculum saccharolyticum	-1.52361	4.30365	-0.299375	0.351563	0.416699	0.845155	0.417272	0.852043	0.852043		ALDEx2_t
1.60 mg/mL - 2.50 mg/mL	p__Firmicutes|c__Clostridia|o__Clostridiales|f__Hungateiclostridiaceae|g__Hungateiclostridium|s__Hungateiclostridium thermocellum	-0.265083	4.28778	-0.0455502	0.471735	0.501608	0.881869	0.565124	0.899649	0.899649		ALDEx2_t
1.60 mg/mL - 2.50 mg/mL	p__Firmicutes|c__Clostridia|o__Clostridiales|f__Ruminococcaceae|g__Papillibacter|s__Papillibacter cinnamivorans	-1.22004	3.77971	-0.254115	0.356725	0.424931	0.839692	0.420742	0.831066	0.831066		ALDEx2_t
1.60 mg/mL - 2.50 mg/mL	p__Firmicutes|c__Clostridia|o__Clostridiales|f__Ruminococcaceae|g__Harryflintia|s__Harryflintia acetispora	0.631222	4.47288	0.127284	0.426901	0.527921	0.873642	0.528344	0.879558	0.879558		ALDEx2_t
1.60 mg/mL - 2.50 mg/mL	p__Firmicutes|c__Clostridia|o__Clostridiales|f__Lachnospiraceae|g__Bariatricus|s__Bariatricus massiliensis	-0.4921	3.70184	-0.094805	0.444444	0.50867	0.878695	0.53113	0.890106	0.890106		ALDEx2_t
1.60 mg/mL - 2.50 mg/mL	p__Firmicutes|c__Clostridia|o__Clostridiales|f__Lachnospiraceae|g__Lachnoclostridium|s__Lachnoclostridium pacaense	0.628791	4.06378	0.122154	0.4375	0.458312	0.852434	0.536679	0.885427	0.885427		ALDEx2_t
1.60 mg/mL - 2.50 mg/mL	p__Firmicutes|c__Clostridia|o__Clostridiales|f__Lachnospiraceae|g__Roseburia|s__Roseburia hominis	0.17144	4.34168	0.0374343	0.472656	0.516386	0.871741	0.539534	0.888595	0.888595		ALDEx2_t
1.60 mg/mL - 2.50 mg/mL	p__Firmicutes|c__Clostridia|o__Clostridiales|f__|g__Massilistercora|s__Massilistercora timonensis	0.47328	4.1759	0.107959	0.444444	0.503983	0.878712	0.555242	0.900208	0.900208		ALDEx2_t
1.60 mg/mL - 2.50 mg/mL	p__Firmicutes|c__Clostridia|o__Clostridiales|f__|g__|s__Clostridiales bacterium CCNA10	0.227054	4.06167	0.0509007	0.472656	0.56484	0.890789	0.632931	0.911308	0.911308		ALDEx2_t
1.60 mg/mL - 2.50 mg/mL	p__Firmicutes|c__Clostridia|o__Clostridiales|f__Lachnospiraceae|g__Blautia|s__Blautia sp. N6H1-15	0.231179	4.40226	0.0492888	0.473684	0.5197	0.876364	0.548566	0.891952	0.891952		ALDEx2_t
1.60 mg/mL - 2.50 mg/mL	p__Firmicutes|c__Clostridia|o__Clostridiales|f__Lachnospiraceae|g__Faecalicatena|s__Faecalicatena fissicatena	0.508264	4.14774	0.108275	0.444444	0.494767	0.862168	0.480535	0.872089	0.872089		ALDEx2_t
1.60 mg/mL - 2.50 mg/mL	p__Firmicutes|c__Clostridia|o__Clostridiales|f__Peptococcaceae|g__Dehalobacterium|s__Dehalobacterium formicoaceticum	-0.118842	4.25781	-0.0294846	0.483431	0.526309	0.883164	0.557714	0.893187	0.893187		ALDEx2_t
1.60 mg/mL - 2.50 mg/mL	p__Firmicutes|c__Clostridia|o__Clostridiales|f__Peptostreptococcaceae|g__Clostridioides|s__Clostridioides difficile	-1.26073	4.32921	-0.24491	0.37037	0.398749	0.834223	0.42725	0.852693	0.852693		ALDEx2_t
1.60 mg/mL - 2.50 mg/mL	p__Firmicutes|c__Clostridia|o__Clostridiales|f__Lachnospiraceae|g__|s__Lachnospiraceae bacterium oral taxon 500	-0.248237	4.51947	-0.0529183	0.486328	0.519307	0.873536	0.558133	0.886732	0.886732		ALDEx2_t
1.60 mg/mL - 2.50 mg/mL	p__Firmicutes|c__Clostridia|o__Clostridiales|f__Peptococcaceae|g__|s__Peptococcaceae bacterium DCMF	-0.794528	4.44701	-0.149439	0.432749	0.455463	0.85479	0.499097	0.868498	0.868498		ALDEx2_t
1.60 mg/mL - 2.50 mg/mL	p__Firmicutes|c__Clostridia|o__Clostridiales|f__Clostridiaceae|g__Butyricicoccus|s__Butyricicoccus pullicaecorum	-1.50246	4.43336	-0.316334	0.335938	0.39938	0.832376	0.397722	0.829623	0.829623		ALDEx2_t
1.60 mg/mL - 2.50 mg/mL	p__Firmicutes|c__Clostridia|o__Clostridiales|f__Clostridiaceae|g__Hungatella|s__Hungatella xylanolytica	-0.189882	4.03904	-0.0433272	0.478516	0.575807	0.884952	0.582752	0.891172	0.891172		ALDEx2_t
1.60 mg/mL - 2.50 mg/mL	p__Firmicutes|c__Clostridia|o__Clostridiales|f__Clostridiaceae|g__Clostridium|s__Clostridium subterminale	-0.467017	4.35935	-0.085541	0.457031	0.488081	0.863829	0.527936	0.884077	0.884077		ALDEx2_t
1.60 mg/mL - 6.60 mg/mL	p__Firmicutes|c__Clostridia|o__Clostridiales|f__Lachnospiraceae|g__|s__Lachnospiraceae bacterium GAM79	-2.00182	1.75523	-1.09944	0.107422	0.000755675	0.0406735	0.00191752	0.0369897	0.0369897	*	ALDEx2_t
1.60 mg/mL - 6.60 mg/mL	p__Firmicutes|c__Clostridia|o__Clostridiales|f__Eubacteriaceae|g__Eubacterium|s__Eubacterium ventriosum	-2.32832	2.15685	-1.00396	0.103516	0.00291593	0.0650727	0.00153766	0.0325602	0.0325602	*	ALDEx2_t
1.60 mg/mL - 6.60 mg/mL	p__Firmicutes|c__Clostridia|o__Clostridiales|f__Lachnospiraceae|g__Lacrimispora|s__Lacrimispora saccharolytica	-1.93539	2.03682	-0.857699	0.19336	0.0525535	0.254115	0.0214055	0.127763	0.127763		ALDEx2_t
1.60 mg/mL - 6.60 mg/mL	p__Firmicutes|c__Clostridia|o__Clostridiales|f__Lachnospiraceae|g__Eisenbergiella|s__Eisenbergiella massiliensis	-0.953536	1.64889	-0.521825	0.278753	0.183715	0.450663	0.101368	0.29609	0.29609		ALDEx2_t
1.60 mg/mL - 6.60 mg/mL	p__Bacteroidetes|c__Bacteroidia|o__Bacteroidales|f__Muribaculaceae|g__Muribaculum|s__Muribaculum intestinale	3.32707	4.27558	0.695586	0.171875	0.0454375	0.248495	0.0125225	0.0935741	0.0935741		ALDEx2_t
1.60 mg/mL - 6.60 mg/mL	p__Firmicutes|c__Clostridia|o__Clostridiales|f__Oscillospiraceae|g__Dysosmobacter|s__Dysosmobacter welbionis	0.832034	2.23639	0.254768	0.322266	0.153645	0.416854	0.163923	0.374809	0.374809		ALDEx2_t
1.60 mg/mL - 6.60 mg/mL	p__Firmicutes|c__Clostridia|o__Clostridiales|f__|g__Flintibacter|s__Flintibacter sp. KGMB00164	-0.0247537	2.17639	-0.00361865	0.499025	0.633566	0.803928	0.833516	0.919314	0.919314		ALDEx2_t
1.60 mg/mL - 6.60 mg/mL	p__Firmicutes|c__Clostridia|o__Clostridiales|f__Lachnospiraceae|g__Anaerotaenia|s__Anaerotaenia torta	-0.283102	1.91514	-0.105537	0.450292	0.819407	0.907738	0.680728	0.82986	0.82986		ALDEx2_t
1.60 mg/mL - 6.60 mg/mL	p__Firmicutes|c__Clostridia|o__Clostridiales|f__Clostridiaceae|g__Clostridium|s__Clostridium sp. BNL1100	-2.77843	2.38771	-1.03343	0.124757	0.0695658	0.235442	0.00413931	0.0543903	0.0543903		ALDEx2_t
1.60 mg/mL - 6.60 mg/mL	p__Firmicutes|c__Clostridia|o__Clostridiales|f__Lachnospiraceae|g__Lachnoclostridium|s__Lachnoclostridium phytofermentans	-0.157947	2.12719	-0.0485866	0.462891	0.684231	0.834331	0.722102	0.852346	0.852346		ALDEx2_t
1.60 mg/mL - 6.60 mg/mL	p__Firmicutes|c__Clostridia|o__Clostridiales|f__Oscillospiraceae|g__Oscillibacter|s__Oscillibacter valericigenes	1.90896	2.64163	0.661758	0.240234	0.0770347	0.303384	0.0755766	0.240934	0.240934		ALDEx2_t
1.60 mg/mL - 6.60 mg/mL	p__Firmicutes|c__Clostridia|o__Clostridiales|f__Ruminococcaceae|g__Flavonifractor|s__Flavonifractor plautii	0.575958	3.44343	0.142772	0.439453	0.376621	0.623813	0.670883	0.832044	0.832044		ALDEx2_t
1.60 mg/mL - 6.60 mg/mL	p__Verrucomicrobia|c__Verrucomicrobiae|o__Verrucomicrobiales|f__Akkermansiaceae|g__Akkermansia|s__Akkermansia muciniphila	4.07833	5.00935	0.744835	0.22461	0.0503544	0.207053	0.0436471	0.165263	0.165263		ALDEx2_t
1.60 mg/mL - 6.60 mg/mL	p__Firmicutes|c__Clostridia|o__Clostridiales|f__Ruminococcaceae|g__Anaerotruncus|s__Anaerotruncus rubiinfantis	0.332233	2.05948	0.132653	0.417154	0.690702	0.835752	0.591464	0.769229	0.769229		ALDEx2_t
1.60 mg/mL - 6.60 mg/mL	p__Firmicutes|c__Clostridia|o__Clostridiales|f__Clostridiaceae|g__Hungatella|s__Hungatella hathewayi	0.247231	1.88652	0.123002	0.45614	0.81467	0.905361	0.674003	0.823679	0.823679		ALDEx2_t
1.60 mg/mL - 6.60 mg/mL	p__Firmicutes|c__Clostridia|o__Clostridiales|f__Lachnospiraceae|g__Kineothrix|s__Kineothrix alysoides	-1.0486	1.83676	-0.478732	0.31579	0.162047	0.417719	0.172948	0.38991	0.38991		ALDEx2_t
1.60 mg/mL - 6.60 mg/mL	p__Firmicutes|c__Clostridia|o__Clostridiales|f__Lachnospiraceae|g__Lacrimispora|s__Lacrimispora sphenoides	-1.28271	3.01188	-0.330586	0.324219	0.669391	0.814727	0.213543	0.447538	0.447538		ALDEx2_t
1.60 mg/mL - 6.60 mg/mL	p__Firmicutes|c__Clostridia|o__Clostridiales|f__Lachnospiraceae|g__Herbinix|s__Herbinix luporum	-0.249295	1.79879	-0.112912	0.45614	0.762921	0.875958	0.632626	0.785707	0.785707		ALDEx2_t
1.60 mg/mL - 6.60 mg/mL	p__Firmicutes|c__Clostridia|o__Clostridiales|f__Lachnospiraceae|g__Acetatifactor|s__Acetatifactor muris	1.4188	3.72333	0.365705	0.318359	0.14092	0.399587	0.224238	0.449364	0.449364		ALDEx2_t
1.60 mg/mL - 6.60 mg/mL	p__Firmicutes|c__Clostridia|o__Clostridiales|f__Ruminococcaceae|g__Phocea|s__Phocea massiliensis	0.0301005	2.10519	0.00826416	0.493177	0.562051	0.752103	0.736783	0.860836	0.860836		ALDEx2_t
1.60 mg/mL - 6.60 mg/mL	p__Firmicutes|c__Clostridia|o__Clostridiales|f__Christensenellaceae|g__Christensenella|s__Christensenella massiliensis	0.117132	2.80336	0.0289287	0.480469	0.578484	0.767747	0.76859	0.882022	0.882022		ALDEx2_t
1.60 mg/mL - 6.60 mg/mL	p__Firmicutes|c__Clostridia|o__Clostridiales|f__Christensenellaceae|g__Christensenella|s__Christensenella minuta	-1.21349	3.43067	-0.280539	0.390625	0.433864	0.656029	0.421173	0.648265	0.648265		ALDEx2_t
1.60 mg/mL - 6.60 mg/mL	p__Firmicutes|c__Clostridia|o__Clostridiales|f__Lachnospiraceae|g__Faecalimonas|s__Faecalimonas umbilicata	0.163155	2.84088	0.04726	0.478516	0.515352	0.725063	0.803067	0.897647	0.897647		ALDEx2_t
1.60 mg/mL - 6.60 mg/mL	p__Firmicutes|c__Clostridia|o__Clostridiales|f__Eubacteriaceae|g__Eubacterium|s__Eubacterium coprostanoligenes	1.297	4.38758	0.261028	0.417154	0.425059	0.656049	0.547913	0.743043	0.743043		ALDEx2_t
1.60 mg/mL - 6.60 mg/mL	p__Firmicutes|c__Clostridia|o__Clostridiales|f__Ruminococcaceae|g__|s__[Eubacterium] siraeum	-2.04887	3.83588	-0.495158	0.255361	0.17434	0.401023	0.0552011	0.199467	0.199467		ALDEx2_t
1.60 mg/mL - 6.60 mg/mL	p__Firmicutes|c__Clostridia|o__Clostridiales|f__Lachnospiraceae|g__Lachnoclostridium|s__Lachnoclostridium sp. YL32	0.406006	1.89592	0.160403	0.394531	0.364244	0.610219	0.502194	0.677864	0.677864		ALDEx2_t
1.60 mg/mL - 6.60 mg/mL	p__Bacteroidetes|c__Bacteroidia|o__Bacteroidales|f__Rikenellaceae|g__Alistipes|s__Alistipes dispar	-4.79796	6.00714	-0.751203	0.218324	0.0759279	0.258313	0.0735317	0.212866	0.212866		ALDEx2_t
1.60 mg/mL - 6.60 mg/mL	p__Firmicutes|c__Clostridia|o__Clostridiales|f__Lachnospiraceae|g__Enterocloster|s__Enterocloster bolteae	0.526814	2.12013	0.207048	0.375	0.376713	0.625346	0.407464	0.619152	0.619152		ALDEx2_t
1.60 mg/mL - 6.60 mg/mL	p__Firmicutes|c__Clostridia|o__Clostridiales|f__Eubacteriaceae|g__Eubacterium|s__Eubacterium xylanophilum	-2.34953	4.02496	-0.594841	0.173828	0.109057	0.292026	0.0171932	0.106005	0.106005		ALDEx2_t
1.60 mg/mL - 6.60 mg/mL	p__Firmicutes|c__Clostridia|o__Clostridiales|f__Lachnospiraceae|g__Butyrivibrio|s__Butyrivibrio crossotus	-0.359747	2.31125	-0.132493	0.444444	0.720137	0.849368	0.660437	0.813562	0.813562		ALDEx2_t
1.60 mg/mL - 6.60 mg/mL	p__Firmicutes|c__Clostridia|o__Clostridiales|f__Lachnospiraceae|g__Blautia|s__Blautia producta	-1.45074	2.74195	-0.434466	0.282651	0.397894	0.615647	0.129559	0.323184	0.323184		ALDEx2_t
1.60 mg/mL - 6.60 mg/mL	p__Firmicutes|c__Clostridia|o__Clostridiales|f__Ruminococcaceae|g__Ruminococcus|s__Ruminococcus champanellensis	-1.00125	6.11535	-0.140914	0.413255	0.508467	0.69816	0.480575	0.669063	0.669063		ALDEx2_t
1.60 mg/mL - 6.60 mg/mL	p__Firmicutes|c__Clostridia|o__Clostridiales|f__Ruminococcaceae|g__Pseudoflavonifractor|s__Pseudoflavonifractor phocaeensis	2.64793	3.8799	0.5945	0.207031	0.0712133	0.261285	0.0408908	0.157677	0.157677		ALDEx2_t
1.60 mg/mL - 6.60 mg/mL	p__Firmicutes|c__Clostridia|o__Clostridiales|f__Hungateiclostridiaceae|g__Pseudoclostridium|s__Pseudoclostridium thermosuccinogenes	-3.2266	4.5985	-0.606404	0.261719	0.1782	0.380755	0.0779664	0.233896	0.233896		ALDEx2_t
1.60 mg/mL - 6.60 mg/mL	p__Firmicutes|c__Bacilli|o__Lactobacillales|f__Lactobacillaceae|g__Lactobacillus|s__Lactobacillus johnsonii	-1.07694	4.73946	-0.198004	0.384766	0.397449	0.615536	0.430196	0.622876	0.622876		ALDEx2_t
1.60 mg/mL - 6.60 mg/mL	p__Firmicutes|c__Clostridia|o__Clostridiales|f__Hungateiclostridiaceae|g__Hungateiclostridium|s__Hungateiclostridium alkalicellulosi	-3.40651	3.74017	-0.799785	0.161794	0.0574289	0.203156	0.0178811	0.0993491	0.0993491		ALDEx2_t
1.60 mg/mL - 6.60 mg/mL	p__Firmicutes|c__Clostridia|o__Clostridiales|f__Lachnospiraceae|g__Blautia|s__Blautia sp. YL58	-1.45307	3.41522	-0.358216	0.309942	0.365952	0.578161	0.17891	0.385575	0.385575		ALDEx2_t
1.60 mg/mL - 6.60 mg/mL	p__Firmicutes|c__Clostridia|o__Clostridiales|f__Hungateiclostridiaceae|g__Hungateiclostridium|s__Hungateiclostridium aldrichii	-3.6345	4.73414	-0.708554	0.222656	0.130285	0.316495	0.0569231	0.193384	0.193384		ALDEx2_t
1.60 mg/mL - 6.60 mg/mL	p__Firmicutes|c__Clostridia|o__Clostridiales|f__Peptostreptococcaceae|g__Romboutsia|s__Romboutsia ilealis	-3.95266	5.36344	-0.703066	0.196881	0.0864129	0.266861	0.0640415	0.185419	0.185419		ALDEx2_t
1.60 mg/mL - 6.60 mg/mL	p__Firmicutes|c__Clostridia|o__Clostridiales|f__Oscillospiraceae|g__Oscillibacter|s__Oscillibacter sp. PEA192	1.86765	3.08471	0.566147	0.236328	0.0779823	0.301085	0.0607287	0.202621	0.202621		ALDEx2_t
1.60 mg/mL - 6.60 mg/mL	p__Firmicutes|c__Clostridia|o__Clostridiales|f__Lachnospiraceae|g__Anaerocolumna|s__Anaerocolumna cellulosilytica	0.86318	2.58938	0.277523	0.380859	0.369874	0.611998	0.410417	0.619419	0.619419		ALDEx2_t
1.60 mg/mL - 6.60 mg/mL	p__Firmicutes|c__Clostridia|o__Clostridiales|f__Clostridiaceae|g__Clostridium|s__Clostridium sp. SY8519	0.825357	4.72391	0.155983	0.444444	0.499929	0.716147	0.642705	0.80512	0.80512		ALDEx2_t
1.60 mg/mL - 6.60 mg/mL	p__Firmicutes|c__Clostridia|o__Clostridiales|f__Ruminococcaceae|g__Anaeromassilibacillus|s__Anaeromassilibacillus senegalensis	-3.21715	5.3448	-0.532557	0.28655	0.148849	0.362914	0.14689	0.322365	0.322365		ALDEx2_t
1.60 mg/mL - 6.60 mg/mL	p__Firmicutes|c__Clostridia|o__Clostridiales|f__Lachnospiraceae|g__Anaerotignum|s__Anaerotignum lactatifermentans	2.4239	3.13724	0.687091	0.191406	0.0520264	0.237573	0.0186802	0.104602	0.104602		ALDEx2_t
1.60 mg/mL - 6.60 mg/mL	p__Firmicutes|c__Clostridia|o__Clostridiales|f__Lachnospiraceae|g__Faecalicatena|s__Faecalicatena orotica	1.38044	2.98886	0.389787	0.304688	0.143343	0.394211	0.184717	0.383144	0.383144		ALDEx2_t
1.60 mg/mL - 6.60 mg/mL	p__Firmicutes|c__Clostridia|o__Clostridiales|f__Catabacteriaceae|g__Catabacter|s__Catabacter hongkongensis	1.82056	3.6225	0.441461	0.277344	0.199561	0.446251	0.120227	0.304299	0.304299		ALDEx2_t
1.60 mg/mL - 6.60 mg/mL	p__Firmicutes|c__Clostridia|o__Clostridiales|f__Ruminococcaceae|g__Paludicola|s__Paludicola psychrotolerans	0.168795	3.42927	0.0436212	0.460039	0.563686	0.750686	0.688745	0.826381	0.826381		ALDEx2_t
1.60 mg/mL - 6.60 mg/mL	p__Firmicutes|c__Clostridia|o__Clostridiales|f__Ruminococcaceae|g__Pseudoflavonifractor|s__Pseudoflavonifractor capillosus	-0.356797	3.84544	-0.0861266	0.453125	0.666783	0.809968	0.662682	0.804839	0.804839		ALDEx2_t
1.60 mg/mL - 6.60 mg/mL	p__Firmicutes|c__Clostridia|o__Clostridiales|f__|g__Intestinimonas|s__Intestinimonas butyriciproducens	2.37836	3.02638	0.742142	0.154297	0.0370537	0.206665	0.0205792	0.102185	0.102185		ALDEx2_t
1.60 mg/mL - 6.60 mg/mL	p__Firmicutes|c__Clostridia|o__Clostridiales|f__Lachnospiraceae|g__Eisenbergiella|s__Eisenbergiella tayi	-0.34805	2.90585	-0.0975307	0.460039	0.648308	0.803496	0.647379	0.797987	0.797987		ALDEx2_t
1.60 mg/mL - 6.60 mg/mL	p__Firmicutes|c__Clostridia|o__Clostridiales|f__Lachnospiraceae|g__Mediterraneibacter|s__[Ruminococcus] gnavus	-0.641542	3.62227	-0.153772	0.429688	0.67556	0.819425	0.640175	0.792925	0.792925		ALDEx2_t
1.60 mg/mL - 6.60 mg/mL	p__Firmicutes|c__Clostridia|o__Clostridiales|f__Clostridiaceae|g__Geosporobacter|s__Geosporobacter ferrireducens	0.0518362	4.79858	0.00716926	0.495127	0.64097	0.799888	0.733598	0.859874	0.859874		ALDEx2_t
1.60 mg/mL - 6.60 mg/mL	p__Firmicutes|c__Clostridia|o__Clostridiales|f__Lachnospiraceae|g__Robinsoniella|s__Robinsoniella peoriensis	1.02709	4.0726	0.213108	0.388672	0.441693	0.660486	0.483412	0.682104	0.682104		ALDEx2_t
1.60 mg/mL - 6.60 mg/mL	p__Firmicutes|c__Clostridia|o__Clostridiales|f__Ruminococcaceae|g__Ruminococcus|s__Ruminococcus bicirculans	-0.452456	4.47181	-0.0931669	0.45809	0.565725	0.745034	0.633601	0.782314	0.782314		ALDEx2_t
1.60 mg/mL - 6.60 mg/mL	p__Bacteroidetes|c__Bacteroidia|o__Bacteroidales|f__Rikenellaceae|g__Alistipes|s__Alistipes senegalensis	-2.66476	5.20556	-0.479041	0.269006	0.194589	0.394372	0.176511	0.339999	0.339999		ALDEx2_t
1.60 mg/mL - 6.60 mg/mL	p__Firmicutes|c__Clostridia|o__Clostridiales|f__Clostridiaceae|g__Clostridium|s__Clostridium botulinum	0.722875	4.017	0.142999	0.42885	0.513465	0.711002	0.524043	0.711673	0.711673		ALDEx2_t
1.60 mg/mL - 6.60 mg/mL	p__Firmicutes|c__Clostridia|o__Clostridiales|f__Hungateiclostridiaceae|g__Hungateiclostridium|s__Hungateiclostridium saccincola	-3.982	4.00449	-0.905409	0.1423	0.0331293	0.149194	0.00905042	0.0690385	0.0690385		ALDEx2_t
1.60 mg/mL - 6.60 mg/mL	p__Firmicutes|c__Clostridia|o__Clostridiales|f__Peptostreptococcaceae|g__Clostridioides|s__Clostridioides difficile	2.72046	3.68702	0.641281	0.21875	0.0876544	0.287707	0.0439953	0.156347	0.156347		ALDEx2_t
1.60 mg/mL - 6.60 mg/mL	p__Bacteroidetes|c__Bacteroidia|o__Bacteroidales|f__Rikenellaceae|g__Alistipes|s__Alistipes communis	-1.56978	6.24691	-0.277892	0.378168	0.3334	0.551609	0.386944	0.563299	0.563299		ALDEx2_t
1.60 mg/mL - 6.60 mg/mL	p__Firmicutes|c__Clostridia|o__Clostridiales|f__Lachnospiraceae|g__|s__Lachnospiraceae bacterium Choco86	0.880505	3.10459	0.225753	0.387914	0.4425	0.656168	0.452646	0.643878	0.643878		ALDEx2_t
1.60 mg/mL - 6.60 mg/mL	p__Firmicutes|c__Clostridia|o__Clostridiales|f__Lachnospiraceae|g__Anaerotignum|s__Anaerotignum aminivorans	2.78459	3.77307	0.653713	0.220273	0.0719651	0.268204	0.0554165	0.180893	0.180893		ALDEx2_t
1.60 mg/mL - 6.60 mg/mL	p__Firmicutes|c__Clostridia|o__Clostridiales|f__Lachnospiraceae|g__Roseburia|s__Roseburia intestinalis	0.681284	3.57793	0.171651	0.427734	0.510644	0.706324	0.601292	0.766249	0.766249		ALDEx2_t
1.60 mg/mL - 6.60 mg/mL	p__Firmicutes|c__Clostridia|o__Clostridiales|f__Lachnospiraceae|g__Lacrimispora|s__Lacrimispora indolis	0.52835	2.74724	0.140178	0.427734	0.42068	0.641376	0.609257	0.757913	0.757913		ALDEx2_t
1.60 mg/mL - 6.60 mg/mL	p__Firmicutes|c__Clostridia|o__Clostridiales|f__Christensenellaceae|g__Christensenella|s__Christensenella timonensis	0.7568	3.88242	0.182791	0.409357	0.424091	0.638897	0.495549	0.686114	0.686114		ALDEx2_t
1.60 mg/mL - 6.60 mg/mL	p__Firmicutes|c__Clostridia|o__Clostridiales|f__Lachnospiraceae|g__Lachnoclostridium|s__[Clostridium] polysaccharolyticum	1.78238	3.2441	0.471207	0.276803	0.162059	0.394767	0.148378	0.329487	0.329487		ALDEx2_t
1.60 mg/mL - 6.60 mg/mL	p__Firmicutes|c__Clostridia|o__Clostridiales|f__Lachnospiraceae|g__Anaerostipes|s__Anaerostipes hadrus	1.51529	3.54658	0.399478	0.302734	0.283755	0.514271	0.228093	0.424482	0.424482		ALDEx2_t
1.60 mg/mL - 6.60 mg/mL	p__Firmicutes|c__Clostridia|o__Clostridiales|f__Hungateiclostridiaceae|g__Ruminiclostridium|s__Ruminiclostridium cellobioparum	-4.42301	4.29162	-0.987306	0.138672	0.0405678	0.153407	0.0174925	0.0865031	0.0865031		ALDEx2_t
1.60 mg/mL - 6.60 mg/mL	p__Firmicutes|c__Clostridia|o__Clostridiales|f__Hungateiclostridiaceae|g__Hungateiclostridium|s__Hungateiclostridium cellulolyticum	-2.82673	4.51906	-0.532666	0.272905	0.209812	0.399965	0.135958	0.301451	0.301451		ALDEx2_t
1.60 mg/mL - 6.60 mg/mL	p__Firmicutes|c__Clostridia|o__Clostridiales|f__Lachnospiraceae|g__Blautia|s__Blautia sp. SC05B48	-1.00605	3.19198	-0.231785	0.361328	0.469074	0.652404	0.412466	0.593479	0.593479		ALDEx2_t
1.60 mg/mL - 6.60 mg/mL	p__Firmicutes|c__Clostridia|o__Clostridiales|f__Lachnospiraceae|g__Lachnoclostridium|s__Lachnoclostridium pacaense	2.79652	3.31617	0.742161	0.179337	0.0614586	0.227129	0.0341368	0.118109	0.118109		ALDEx2_t
1.60 mg/mL - 6.60 mg/mL	p__Firmicutes|c__Clostridia|o__Clostridiales|f__Lachnospiraceae|g__Lacrimispora|s__Lacrimispora amygdalina	1.64962	3.49714	0.4079	0.2846	0.217074	0.445349	0.188724	0.367457	0.367457		ALDEx2_t
1.60 mg/mL - 6.60 mg/mL	p__Bacteroidetes|c__Bacteroidia|o__Bacteroidales|f__Rikenellaceae|g__Alistipes|s__Alistipes finegoldii	-1.91246	5.33546	-0.384809	0.329435	0.315755	0.520354	0.288389	0.470469	0.470469		ALDEx2_t
1.60 mg/mL - 6.60 mg/mL	p__Firmicutes|c__Clostridia|o__Clostridiales|f__Peptostreptococcaceae|g__Romboutsia|s__Romboutsia timonensis	-1.21212	5.29764	-0.186704	0.410156	0.390802	0.594033	0.418093	0.585851	0.585851		ALDEx2_t
1.60 mg/mL - 6.60 mg/mL	p__Candidatus Melainabacteria|c__|o__Vampirovibrionales|f__|g__Vampirovibrio|s__Vampirovibrio chlorellavorus	-2.15716	5.76439	-0.372405	0.314453	0.232365	0.437029	0.272055	0.446114	0.446114		ALDEx2_t
1.60 mg/mL - 6.60 mg/mL	p__Firmicutes|c__Clostridia|o__Clostridiales|f__Ruminococcaceae|g__Acetivibrio|s__Acetivibrio ethanolgignens	0.583933	3.10497	0.175009	0.401559	0.432973	0.648692	0.513331	0.689789	0.689789		ALDEx2_t
1.60 mg/mL - 6.60 mg/mL	p__Firmicutes|c__Clostridia|o__Clostridiales|f__Ruminococcaceae|g__Acutalibacter|s__Acutalibacter muris	2.07446	4.39432	0.38455	0.320313	0.294921	0.511016	0.234339	0.430292	0.430292		ALDEx2_t
1.60 mg/mL - 6.60 mg/mL	p__Firmicutes|c__Clostridia|o__Clostridiales|f__|g__Colidextribacter|s__Colidextribacter massiliensis	0.411862	3.55005	0.0964181	0.446394	0.490573	0.691243	0.573446	0.74195	0.74195		ALDEx2_t
1.60 mg/mL - 6.60 mg/mL	p__Firmicutes|c__Clostridia|o__Clostridiales|f__Lachnospiraceae|g__Lacrimispora|s__Lacrimispora celerecrescens	-0.867487	4.29338	-0.164858	0.398438	0.481968	0.677501	0.546386	0.718729	0.718729		ALDEx2_t
1.60 mg/mL - 6.60 mg/mL	p__Firmicutes|c__Clostridia|o__Clostridiales|f__Lachnospiraceae|g__Bariatricus|s__Bariatricus massiliensis	1.70172	2.93245	0.481316	0.25	0.189306	0.396527	0.156995	0.29864	0.29864		ALDEx2_t
1.60 mg/mL - 6.60 mg/mL	p__Firmicutes|c__Clostridia|o__Clostridiales|f__Lachnospiraceae|g__Anaerostipes|s__Anaerostipes butyraticus	-0.29228	3.64852	-0.0743316	0.452242	0.554054	0.734125	0.649959	0.788557	0.788557		ALDEx2_t
1.60 mg/mL - 6.60 mg/mL	p__Firmicutes|c__Clostridia|o__Clostridiales|f__Clostridiaceae|g__Butyricicoccus|s__Butyricicoccus pullicaecorum	1.55359	3.99864	0.3419	0.322266	0.278895	0.49783	0.233896	0.413014	0.413014		ALDEx2_t
1.60 mg/mL - 6.60 mg/mL	p__Firmicutes|c__Clostridia|o__Clostridiales|f__Clostridiaceae|g__Clostridium|s__Clostridium sp. JN-9	0.714826	4.30009	0.167626	0.419922	0.576214	0.752831	0.500923	0.674466	0.674466		ALDEx2_t
1.60 mg/mL - 6.60 mg/mL	p__Firmicutes|c__Clostridia|o__Clostridiales|f__Clostridiaceae|g__Clostridium|s__Clostridium tarantellae	1.51121	4.01011	0.327415	0.322266	0.317174	0.544427	0.30154	0.503089	0.503089		ALDEx2_t
1.60 mg/mL - 6.60 mg/mL	p__Firmicutes|c__Clostridia|o__Clostridiales|f__Lachnospiraceae|g__Lachnoclostridium|s__[Clostridium] populeti	-1.35363	4.026	-0.303405	0.34308	0.304169	0.513606	0.252238	0.445982	0.445982		ALDEx2_t
1.60 mg/mL - 6.60 mg/mL	p__Firmicutes|c__Clostridia|o__Clostridiales|f__Eubacteriaceae|g__Eubacterium|s__Eubacterium oxidoreducens	0.292799	3.61817	0.0728983	0.464844	0.544492	0.736422	0.588315	0.753641	0.753641		ALDEx2_t
1.60 mg/mL - 6.60 mg/mL	p__Firmicutes|c__Clostridia|o__Clostridiales|f__Lachnospiraceae|g__Lachnospira|s__Lachnospira eligens	-2.30048	3.62606	-0.574596	0.231969	0.155936	0.334353	0.0846879	0.231362	0.231362		ALDEx2_t
1.60 mg/mL - 6.60 mg/mL	p__Firmicutes|c__Clostridia|o__Clostridiales|f__Ruminococcaceae|g__Negativibacillus|s__Negativibacillus massiliensis	1.53843	3.69075	0.33542	0.306641	0.312981	0.522934	0.248845	0.430463	0.430463		ALDEx2_t
1.60 mg/mL - 6.60 mg/mL	p__Firmicutes|c__Clostridia|o__Clostridiales|f__|g__|s__Clostridiales bacterium CCNA10	1.98404	3.27891	0.523638	0.247563	0.168936	0.381417	0.109935	0.257276	0.257276		ALDEx2_t
1.60 mg/mL - 6.60 mg/mL	p__Firmicutes|c__Erysipelotrichia|o__Erysipelotrichales|f__Erysipelotrichaceae|g__Turicibacter|s__Turicibacter sp. H121	-2.07867	4.88676	-0.381076	0.325536	0.309567	0.517944	0.325697	0.512536	0.512536		ALDEx2_t
1.60 mg/mL - 6.60 mg/mL	p__Firmicutes|c__Clostridia|o__Clostridiales|f__Ruminococcaceae|g__Harryflintia|s__Harryflintia acetispora	2.34827	3.29482	0.625874	0.207031	0.104833	0.305405	0.0608128	0.182313	0.182313		ALDEx2_t
1.60 mg/mL - 6.60 mg/mL	p__Firmicutes|c__Clostridia|o__Clostridiales|f__Ruminococcaceae|g__Hydrogenoanaerobacterium|s__Hydrogenoanaerobacterium saccharovorans	1.45893	3.53304	0.359594	0.333333	0.341804	0.542667	0.280894	0.448076	0.448076		ALDEx2_t
1.60 mg/mL - 6.60 mg/mL	p__Firmicutes|c__Clostridia|o__Clostridiales|f__|g__Ihubacter|s__Ihubacter massiliensis	0.0942938	4.21894	0.0209819	0.496094	0.577282	0.755393	0.642	0.789402	0.789402		ALDEx2_t
1.60 mg/mL - 6.60 mg/mL	p__Bacteroidetes|c__Bacteroidia|o__Bacteroidales|f__Rikenellaceae|g__Alistipes|s__Alistipes onderdonkii	-1.48531	5.14099	-0.248346	0.378906	0.367717	0.56944	0.384445	0.56263	0.56263		ALDEx2_t
1.60 mg/mL - 6.60 mg/mL	p__Firmicutes|c__Clostridia|o__Clostridiales|f__Lachnospiraceae|g__Lacrimispora|s__Lacrimispora algidixylanolytica	-0.340927	3.49542	-0.0813182	0.452242	0.500696	0.687818	0.539702	0.713827	0.713827		ALDEx2_t
1.60 mg/mL - 6.60 mg/mL	p__Firmicutes|c__Clostridia|o__Clostridiales|f__Clostridiaceae|g__Falcatimonas|s__Falcatimonas natans	0.828662	3.85962	0.179318	0.396484	0.460338	0.67113	0.430912	0.61412	0.61412		ALDEx2_t
1.60 mg/mL - 6.60 mg/mL	p__Bacteroidetes|c__Bacteroidia|o__Bacteroidales|f__Rikenellaceae|g__Alistipes|s__Alistipes putredinis	-2.50906	4.87704	-0.483522	0.273438	0.190189	0.385837	0.149172	0.30737	0.30737		ALDEx2_t
1.60 mg/mL - 6.60 mg/mL	p__Firmicutes|c__Clostridia|o__Clostridiales|f__Clostridiaceae|g__Clostridium|s__Clostridium merdae	-2.28245	5.09249	-0.419755	0.306641	0.26892	0.467874	0.268745	0.437468	0.437468		ALDEx2_t
1.60 mg/mL - 6.60 mg/mL	p__Firmicutes|c__Clostridia|o__Clostridiales|f__Lachnospiraceae|g__Anaerocolumna|s__Anaerocolumna xylanovorans	1.73196	3.88351	0.374346	0.308594	0.259665	0.474986	0.227348	0.391223	0.391223		ALDEx2_t
1.60 mg/mL - 6.60 mg/mL	p__Firmicutes|c__Clostridia|o__Clostridiales|f__Hungateiclostridiaceae|g__Anaerobacterium|s__Anaerobacterium chartisolvens	-0.73284	4.32837	-0.140351	0.419103	0.470867	0.661397	0.500682	0.669324	0.669324		ALDEx2_t
1.60 mg/mL - 6.60 mg/mL	p__Firmicutes|c__Clostridia|o__Clostridiales|f__Peptococcaceae|g__Dehalobacterium|s__Dehalobacterium formicoaceticum	1.43157	3.3741	0.350532	0.31579	0.263052	0.482216	0.228384	0.400458	0.400458		ALDEx2_t
1.60 mg/mL - 6.60 mg/mL	p__Firmicutes|c__Erysipelotrichia|o__Erysipelotrichales|f__Erysipelotrichaceae|g__Breznakia|s__Breznakia pachnodae	-1.6218	4.74403	-0.300444	0.34308	0.369794	0.565163	0.361807	0.531127	0.531127		ALDEx2_t
1.60 mg/mL - 6.60 mg/mL	p__Firmicutes|c__Clostridia|o__Clostridiales|f__Hungateiclostridiaceae|g__Ruminiclostridium|s__Ruminiclostridium cellulolyticum	-1.3047	4.52716	-0.254222	0.367188	0.371893	0.577705	0.379349	0.568561	0.568561		ALDEx2_t
1.60 mg/mL - 6.60 mg/mL	p__Firmicutes|c__Clostridia|o__Clostridiales|f__Clostridiaceae|g__Clostridium|s__Clostridium saudiense	-0.686232	4.29992	-0.13933	0.431641	0.534068	0.707556	0.588645	0.748842	0.748842		ALDEx2_t
1.60 mg/mL - 6.60 mg/mL	p__Firmicutes|c__Clostridia|o__Clostridiales|f__|g__Monoglobus|s__Monoglobus pectinilyticus	-1.20923	4.50125	-0.250924	0.378168	0.401831	0.589874	0.401791	0.587494	0.587494		ALDEx2_t
1.60 mg/mL - 6.60 mg/mL	p__Firmicutes|c__Clostridia|o__Clostridiales|f__Ruminococcaceae|g__|s__[Clostridium] methylpentosum	0.197902	3.94634	0.044171	0.471735	0.569754	0.745732	0.613354	0.766891	0.766891		ALDEx2_t
1.60 mg/mL - 6.60 mg/mL	p__Firmicutes|c__Clostridia|o__Clostridiales|f__|g__Massilistercora|s__Massilistercora timonensis	1.57478	3.63314	0.405026	0.291016	0.303368	0.513731	0.2469	0.413065	0.413065		ALDEx2_t
1.60 mg/mL - 6.60 mg/mL	p__Firmicutes|c__Clostridia|o__Clostridiales|f__Lachnospiraceae|g__Anaerobutyricum|s__Anaerobutyricum hallii	1.7466	3.4501	0.449951	0.265107	0.22062	0.432531	0.169098	0.327704	0.327704		ALDEx2_t
1.60 mg/mL - 6.60 mg/mL	p__Firmicutes|c__Clostridia|o__Clostridiales|f__Ruminococcaceae|g__Papillibacter|s__Papillibacter cinnamivorans	0.148445	3.75114	0.0340383	0.479532	0.530709	0.716064	0.569282	0.739251	0.739251		ALDEx2_t
1.60 mg/mL - 6.60 mg/mL	p__Firmicutes|c__Clostridia|o__Clostridiales|f__Peptococcaceae|g__|s__Peptococcaceae bacterium DCMF	0.8033	3.85837	0.186914	0.401559	0.471412	0.667776	0.432858	0.611263	0.611263		ALDEx2_t
1.60 mg/mL - 6.60 mg/mL	p__Firmicutes|c__Clostridia|o__Clostridiales|f__Ruminococcaceae|g__Tepidibaculum|s__Tepidibaculum saccharolyticum	-1.05542	4.46945	-0.208154	0.401559	0.435237	0.629697	0.481683	0.655839	0.655839		ALDEx2_t
1.60 mg/mL - 6.60 mg/mL	p__Firmicutes|c__Clostridia|o__Clostridiales|f__Lachnospiraceae|g__Anaerostipes|s__Anaerostipes rhamnosivorans	0.505559	4.12034	0.118635	0.439453	0.476317	0.674397	0.502157	0.666612	0.666612		ALDEx2_t
1.60 mg/mL - 6.60 mg/mL	p__Firmicutes|c__Clostridia|o__Clostridiales|f__Lachnospiraceae|g__Roseburia|s__Roseburia hominis	1.32098	4.07946	0.282826	0.365234	0.418923	0.615444	0.392043	0.560661	0.560661		ALDEx2_t
1.60 mg/mL - 6.60 mg/mL	p__Bacteroidetes|c__Bacteroidia|o__Bacteroidales|f__Rikenellaceae|g__Alistipes|s__Alistipes megaguti	-2.85443	4.54639	-0.549641	0.25	0.152669	0.325615	0.103064	0.241473	0.241473		ALDEx2_t
1.60 mg/mL - 6.60 mg/mL	p__Firmicutes|c__Clostridia|o__Clostridiales|f__Ruminococcaceae|g__|s__[Clostridium] viride	0.363904	3.94078	0.0837884	0.45809	0.53345	0.711928	0.540708	0.709382	0.709382		ALDEx2_t
1.60 mg/mL - 6.60 mg/mL	p__Firmicutes|c__Clostridia|o__Clostridiales|f__Lachnospiraceae|g__Parasporobacterium|s__Parasporobacterium paucivorans	-0.933743	3.92244	-0.215096	0.397661	0.451949	0.640616	0.443538	0.622223	0.622223		ALDEx2_t
1.60 mg/mL - 6.60 mg/mL	p__Firmicutes|c__Clostridia|o__Clostridiales|f__Ruminococcaceae|g__Caproiciproducens|s__Caproiciproducens galactitolivorans	0.0504436	4.53319	0.00804783	0.497076	0.525348	0.714801	0.553248	0.725025	0.725025		ALDEx2_t
1.60 mg/mL - 6.60 mg/mL	p__Firmicutes|c__Clostridia|o__Clostridiales|f__Clostridiaceae|g__Clostridium|s__Clostridium subterminale	0.771535	4.81	0.153872	0.421875	0.533079	0.707228	0.542443	0.701104	0.701104		ALDEx2_t
1.60 mg/mL - 6.60 mg/mL	p__Firmicutes|c__Clostridia|o__Clostridiales|f__Lachnospiraceae|g__Schaedlerella|s__Schaedlerella arabinosiphila	-1.74554	4.52812	-0.342458	0.337232	0.367966	0.546945	0.322314	0.497034	0.497034		ALDEx2_t
1.60 mg/mL - 6.60 mg/mL	p__Firmicutes|c__Clostridia|o__Clostridiales|f__Clostridiaceae|g__Clostridium|s__Clostridium beijerinckii	0.845748	4.33876	0.158283	0.421875	0.488884	0.68077	0.512202	0.682564	0.682564		ALDEx2_t
1.60 mg/mL - 6.60 mg/mL	p__Firmicutes|c__Clostridia|o__Clostridiales|f__Hungateiclostridiaceae|g__|s__Hungateiclostridiaceae bacterium KB18	0.363476	4.34684	0.0829083	0.465887	0.54486	0.727681	0.573547	0.736387	0.736387		ALDEx2_t
1.60 mg/mL - 6.60 mg/mL	p__Tenericutes|c__Mollicutes|o__Entomoplasmatales|f__Spiroplasmataceae|g__Spiroplasma|s__Spiroplasma syrphidicola	-2.29768	4.76276	-0.440001	0.290448	0.303125	0.487023	0.245409	0.411762	0.411762		ALDEx2_t
1.60 mg/mL - 6.60 mg/mL	p__Firmicutes|c__Clostridia|o__Clostridiales|f__Ruminococcaceae|g__Faecalibacterium|s__Faecalibacterium prausnitzii	-1.15214	4.11542	-0.190657	0.39961	0.449855	0.637478	0.434217	0.619264	0.619264		ALDEx2_t
1.60 mg/mL - 6.60 mg/mL	p__Firmicutes|c__Clostridia|o__Clostridiales|f__Lachnospiraceae|g__Blautia|s__Blautia sp. N6H1-15	0.734691	4.05677	0.147983	0.407407	0.46623	0.661249	0.465378	0.643866	0.643866		ALDEx2_t
1.60 mg/mL - 6.60 mg/mL	p__Firmicutes|c__Clostridia|o__Clostridiales|f__Clostridiaceae|g__Clostridium|s__Clostridium disporicum	-0.293484	4.44314	-0.0594163	0.467836	0.524482	0.71341	0.586655	0.748085	0.748085		ALDEx2_t
1.60 mg/mL - 6.60 mg/mL	p__Firmicutes|c__Clostridia|o__Clostridiales|f__Clostridiaceae|g__Clostridium|s__Clostridium ventriculi	1.16535	3.92031	0.239379	0.362573	0.377181	0.58469	0.359059	0.539916	0.539916		ALDEx2_t
1.60 mg/mL - 6.60 mg/mL	p__Firmicutes|c__Clostridia|o__Clostridiales|f__Lachnospiraceae|g__Faecalicatena|s__Faecalicatena contorta	-0.00959272	4.115	-0.00122737	0.498047	0.520836	0.706137	0.561035	0.724859	0.724859		ALDEx2_t
1.60 mg/mL - 6.60 mg/mL	p__Firmicutes|c__Clostridia|o__Clostridiales|f__Lachnospiraceae|g__Marvinbryantia|s__Marvinbryantia formatexigens	0.335514	3.96857	0.0756144	0.445313	0.506302	0.696194	0.533632	0.701756	0.701756		ALDEx2_t
1.60 mg/mL - 6.60 mg/mL	p__Firmicutes|c__Clostridia|o__Clostridiales|f__Clostridiaceae|g__Hungatella|s__Hungatella xylanolytica	0.709579	3.95235	0.163555	0.39961	0.500238	0.691123	0.473696	0.652878	0.652878		ALDEx2_t
1.60 mg/mL - 6.60 mg/mL	p__Firmicutes|c__Clostridia|o__Clostridiales|f__Hungateiclostridiaceae|g__Hungateiclostridium|s__Hungateiclostridium straminisolvens	-1.65237	3.97626	-0.348081	0.31384	0.32025	0.521291	0.290778	0.473289	0.473289		ALDEx2_t
1.60 mg/mL - 6.60 mg/mL	p__Firmicutes|c__Clostridia|o__Clostridiales|f__Lachnospiraceae|g__Lachnoclostridium|s__[Clostridium] scindens	-0.166556	4.36194	-0.0351355	0.46875	0.535223	0.705718	0.540208	0.702961	0.702961		ALDEx2_t
1.60 mg/mL - 6.60 mg/mL	p__Firmicutes|c__Clostridia|o__Clostridiales|f__Hungateiclostridiaceae|g__Hungateiclostridium|s__Hungateiclostridium clariflavum	-1.72796	4.21922	-0.31435	0.320313	0.301462	0.484538	0.25759	0.427934	0.427934		ALDEx2_t
1.60 mg/mL - 6.60 mg/mL	p__Firmicutes|c__Erysipelotrichia|o__Erysipelotrichales|f__Erysipelotrichaceae|g__Faecalitalea|s__Faecalitalea cylindroides	-1.92664	4.25375	-0.375943	0.310547	0.271429	0.456678	0.254592	0.420324	0.420324		ALDEx2_t
1.60 mg/mL - 6.60 mg/mL	p__Firmicutes|c__Clostridia|o__Clostridiales|f__Hungateiclostridiaceae|g__Hungateiclostridium|s__Hungateiclostridium thermocellum	-0.584281	4.36771	-0.113194	0.438597	0.484915	0.66949	0.474834	0.651127	0.651127		ALDEx2_t
1.60 mg/mL - 6.60 mg/mL	p__Tenericutes|c__Mollicutes|o__Entomoplasmatales|f__Spiroplasmataceae|g__Spiroplasma|s__Spiroplasma lampyridicola	-1.43254	4.45193	-0.303937	0.355469	0.363512	0.553082	0.357861	0.525074	0.525074		ALDEx2_t
1.60 mg/mL - 6.60 mg/mL	p__Firmicutes|c__Bacilli|o__Lactobacillales|f__Lactobacillaceae|g__Lactobacillus|s__Lactobacillus rogosae	-0.808616	4.18185	-0.167226	0.417969	0.44824	0.64331	0.478606	0.653098	0.653098		ALDEx2_t
1.60 mg/mL - 6.60 mg/mL	p__Tenericutes|c__Mollicutes|o__Entomoplasmatales|f__Spiroplasmataceae|g__Spiroplasma|s__Spiroplasma chrysopicola	-1.85657	4.19821	-0.361354	0.307992	0.260444	0.463719	0.214569	0.38602	0.38602		ALDEx2_t
1.60 mg/mL - 6.60 mg/mL	p__Firmicutes|c__Clostridia|o__Clostridiales|f__Lachnospiraceae|g__Faecalicatena|s__Faecalicatena fissicatena	-0.103174	4.15007	-0.0262311	0.489279	0.492745	0.680476	0.520332	0.685494	0.685494		ALDEx2_t
1.60 mg/mL - 6.60 mg/mL	p__Firmicutes|c__Clostridia|o__Clostridiales|f__Lachnospiraceae|g__|s__Lachnospiraceae bacterium oral taxon 500	-0.390711	4.35396	-0.0756407	0.460938	0.485302	0.675953	0.514156	0.682293	0.682293		ALDEx2_t
1.60 mg/mL - 0.80 mg/mL	p__Firmicutes|c__Clostridia|o__Clostridiales|f__Lachnospiraceae|g__|s__Lachnospiraceae bacterium GAM79	0.380986	1.67226	0.210092	0.40625	0.45035	0.913043	0.567339	0.947947	0.947947		ALDEx2_t
1.60 mg/mL - 0.80 mg/mL	p__Firmicutes|c__Clostridia|o__Clostridiales|f__Lachnospiraceae|g__Lacrimispora|s__Lacrimispora saccharolytica	0.405298	2.25792	0.156418	0.42885	0.603859	0.932986	0.687529	0.959931	0.959931		ALDEx2_t
1.60 mg/mL - 0.80 mg/mL	p__Firmicutes|c__Clostridia|o__Clostridiales|f__Lachnospiraceae|g__Eisenbergiella|s__Eisenbergiella massiliensis	0.253022	2.20179	0.10533	0.460039	0.75256	0.954661	0.822173	0.975309	0.975309		ALDEx2_t
1.60 mg/mL - 0.80 mg/mL	p__Firmicutes|c__Clostridia|o__Clostridiales|f__Clostridiaceae|g__Clostridium|s__Clostridium sp. BNL1100	-1.59702	2.90519	-0.421904	0.282651	0.346361	0.890653	0.163542	0.871574	0.871574		ALDEx2_t
1.60 mg/mL - 0.80 mg/mL	p__Firmicutes|c__Clostridia|o__Clostridiales|f__Lachnospiraceae|g__Lacrimispora|s__Lacrimispora sphenoides	1.0179	2.86007	0.249257	0.353516	0.202704	0.871117	0.305146	0.906268	0.906268		ALDEx2_t
1.60 mg/mL - 0.80 mg/mL	p__Firmicutes|c__Clostridia|o__Clostridiales|f__Eubacteriaceae|g__Eubacterium|s__Eubacterium ventriosum	-0.991884	2.6988	-0.342256	0.384766	0.376724	0.905725	0.435309	0.931136	0.931136		ALDEx2_t
1.60 mg/mL - 0.80 mg/mL	p__Bacteroidetes|c__Bacteroidia|o__Bacteroidales|f__Muribaculaceae|g__Muribaculum|s__Muribaculum intestinale	-0.424937	6.54068	-0.0576588	0.45614	0.71329	0.94726	0.720982	0.960096	0.960096		ALDEx2_t
1.60 mg/mL - 0.80 mg/mL	p__Firmicutes|c__Clostridia|o__Clostridiales|f__|g__Flintibacter|s__Flintibacter sp. KGMB00164	-0.898035	3.23057	-0.232744	0.393762	0.568469	0.923135	0.434012	0.93043	0.93043		ALDEx2_t
1.60 mg/mL - 0.80 mg/mL	p__Firmicutes|c__Clostridia|o__Clostridiales|f__Eubacteriaceae|g__Eubacterium|s__Eubacterium coprostanoligenes	1.74383	5.69429	0.256951	0.404297	0.402806	0.902894	0.501901	0.931886	0.931886		ALDEx2_t
1.60 mg/mL - 0.80 mg/mL	p__Firmicutes|c__Clostridia|o__Clostridiales|f__Christensenellaceae|g__Christensenella|s__Christensenella minuta	0.430399	4.78904	0.0728148	0.45809	0.807534	0.960751	0.799843	0.973728	0.973728		ALDEx2_t
1.60 mg/mL - 0.80 mg/mL	p__Firmicutes|c__Clostridia|o__Clostridiales|f__Clostridiaceae|g__Hungatella|s__Hungatella hathewayi	0.687152	2.52301	0.257998	0.396484	0.502851	0.917594	0.466935	0.933406	0.933406		ALDEx2_t
1.60 mg/mL - 0.80 mg/mL	p__Firmicutes|c__Clostridia|o__Clostridiales|f__Lachnospiraceae|g__Kineothrix|s__Kineothrix alysoides	-0.216527	2.11092	-0.096417	0.462891	0.800419	0.957759	0.835155	0.975498	0.975498		ALDEx2_t
1.60 mg/mL - 0.80 mg/mL	p__Bacteroidetes|c__Bacteroidia|o__Bacteroidales|f__Rikenellaceae|g__Alistipes|s__Alistipes dispar	-1.28376	6.8591	-0.22825	0.408203	0.50532	0.916592	0.52687	0.936248	0.936248		ALDEx2_t
1.60 mg/mL - 0.80 mg/mL	p__Firmicutes|c__Clostridia|o__Clostridiales|f__Eubacteriaceae|g__Eubacterium|s__Eubacterium xylanophilum	0.0695091	3.89353	0.0157752	0.486328	0.639722	0.932847	0.812204	0.973889	0.973889		ALDEx2_t
1.60 mg/mL - 0.80 mg/mL	p__Firmicutes|c__Clostridia|o__Clostridiales|f__Ruminococcaceae|g__Anaeromassilibacillus|s__Anaeromassilibacillus senegalensis	-1.05305	6.38441	-0.158874	0.419922	0.564286	0.924881	0.576523	0.945836	0.945836		ALDEx2_t
1.60 mg/mL - 0.80 mg/mL	p__Firmicutes|c__Clostridia|o__Clostridiales|f__Lachnospiraceae|g__Anaerotaenia|s__Anaerotaenia torta	-2.18283	3.09693	-0.606915	0.214425	0.0703462	0.831243	0.0654766	0.802612	0.802612		ALDEx2_t
1.60 mg/mL - 0.80 mg/mL	p__Firmicutes|c__Clostridia|o__Clostridiales|f__Oscillospiraceae|g__Dysosmobacter|s__Dysosmobacter welbionis	-1.08624	4.74963	-0.206844	0.389864	0.586907	0.926674	0.529209	0.942013	0.942013		ALDEx2_t
1.60 mg/mL - 0.80 mg/mL	p__Firmicutes|c__Bacilli|o__Lactobacillales|f__Lactobacillaceae|g__Lactobacillus|s__Lactobacillus johnsonii	1.44502	5.09422	0.255156	0.380117	0.517869	0.914247	0.509365	0.935776	0.935776		ALDEx2_t
1.60 mg/mL - 0.80 mg/mL	p__Firmicutes|c__Clostridia|o__Clostridiales|f__Ruminococcaceae|g__Flavonifractor|s__Flavonifractor plautii	-0.053713	4.21442	-0.0125263	0.492188	0.672989	0.944154	0.844454	0.977304	0.977304		ALDEx2_t
1.60 mg/mL - 0.80 mg/mL	p__Firmicutes|c__Clostridia|o__Clostridiales|f__Ruminococcaceae|g__Ruminococcus|s__Ruminococcus champanellensis	2.16952	6.28202	0.332128	0.361328	0.387537	0.901727	0.386018	0.92035	0.92035		ALDEx2_t
1.60 mg/mL - 0.80 mg/mL	p__Firmicutes|c__Clostridia|o__Clostridiales|f__Ruminococcaceae|g__|s__[Eubacterium] siraeum	-2.0739	4.03685	-0.457704	0.233918	0.164255	0.849208	0.0801778	0.80702	0.80702		ALDEx2_t
1.60 mg/mL - 0.80 mg/mL	p__Firmicutes|c__Clostridia|o__Clostridiales|f__Lachnospiraceae|g__Faecalimonas|s__Faecalimonas umbilicata	0.790417	3.9587	0.158005	0.419922	0.572688	0.927298	0.693493	0.960572	0.960572		ALDEx2_t
1.60 mg/mL - 0.80 mg/mL	p__Firmicutes|c__Clostridia|o__Clostridiales|f__Lachnospiraceae|g__Lachnoclostridium|s__Lachnoclostridium phytofermentans	-2.63712	3.61893	-0.62465	0.235868	0.160661	0.854256	0.0653327	0.808374	0.808374		ALDEx2_t
1.60 mg/mL - 0.80 mg/mL	p__Firmicutes|c__Clostridia|o__Clostridiales|f__Hungateiclostridiaceae|g__Hungateiclostridium|s__Hungateiclostridium alkalicellulosi	-1.44936	4.23645	-0.2844	0.335938	0.378718	0.899416	0.320939	0.909287	0.909287		ALDEx2_t
1.60 mg/mL - 0.80 mg/mL	p__Firmicutes|c__Clostridia|o__Clostridiales|f__Christensenellaceae|g__Christensenella|s__Christensenella massiliensis	0.347003	3.87472	0.0725571	0.460039	0.702382	0.944002	0.808606	0.97344	0.97344		ALDEx2_t
1.60 mg/mL - 0.80 mg/mL	p__Firmicutes|c__Clostridia|o__Clostridiales|f__Ruminococcaceae|g__Anaerotruncus|s__Anaerotruncus rubiinfantis	-1.04949	2.50889	-0.324185	0.318359	0.373533	0.89202	0.248311	0.879717	0.879717		ALDEx2_t
1.60 mg/mL - 0.80 mg/mL	p__Firmicutes|c__Clostridia|o__Clostridiales|f__Hungateiclostridiaceae|g__Pseudoclostridium|s__Pseudoclostridium thermosuccinogenes	-1.71085	4.40307	-0.341736	0.329435	0.534983	0.92203	0.285802	0.898437	0.898437		ALDEx2_t
1.60 mg/mL - 0.80 mg/mL	p__Firmicutes|c__Clostridia|o__Clostridiales|f__Lachnospiraceae|g__Herbinix|s__Herbinix luporum	-1.40627	2.91771	-0.413611	0.285156	0.179184	0.861161	0.136984	0.840934	0.840934		ALDEx2_t
1.60 mg/mL - 0.80 mg/mL	p__Firmicutes|c__Clostridia|o__Clostridiales|f__Lachnospiraceae|g__Blautia|s__Blautia sp. YL58	0.264294	3.70015	0.0657021	0.45614	0.684726	0.942534	0.794925	0.972564	0.972564		ALDEx2_t
1.60 mg/mL - 0.80 mg/mL	p__Firmicutes|c__Clostridia|o__Clostridiales|f__Peptostreptococcaceae|g__Romboutsia|s__Romboutsia ilealis	-2.51773	5.77952	-0.368229	0.328125	0.295031	0.865794	0.294529	0.869955	0.869955		ALDEx2_t
1.60 mg/mL - 0.80 mg/mL	p__Firmicutes|c__Clostridia|o__Clostridiales|f__Hungateiclostridiaceae|g__Hungateiclostridium|s__Hungateiclostridium aldrichii	-1.66801	4.75781	-0.321244	0.327485	0.466077	0.90973	0.286309	0.896293	0.896293		ALDEx2_t
1.60 mg/mL - 0.80 mg/mL	p__Firmicutes|c__Clostridia|o__Clostridiales|f__Lachnospiraceae|g__Lachnoclostridium|s__Lachnoclostridium sp. YL32	0.596199	2.75276	0.177551	0.385965	0.449097	0.905037	0.495746	0.931161	0.931161		ALDEx2_t
1.60 mg/mL - 0.80 mg/mL	p__Firmicutes|c__Clostridia|o__Clostridiales|f__Ruminococcaceae|g__Phocea|s__Phocea massiliensis	0.0865775	3.14506	0.0224497	0.488281	0.701333	0.948604	0.833739	0.976595	0.976595		ALDEx2_t
1.60 mg/mL - 0.80 mg/mL	p__Firmicutes|c__Clostridia|o__Clostridiales|f__Lachnospiraceae|g__Acetatifactor|s__Acetatifactor muris	0.279848	5.05427	0.0510781	0.471735	0.635465	0.938412	0.753248	0.968195	0.968195		ALDEx2_t
1.60 mg/mL - 0.80 mg/mL	p__Firmicutes|c__Clostridia|o__Clostridiales|f__Clostridiaceae|g__Geosporobacter|s__Geosporobacter ferrireducens	1.85597	5.21492	0.312182	0.351563	0.362665	0.89812	0.320612	0.902779	0.902779		ALDEx2_t
1.60 mg/mL - 0.80 mg/mL	p__Firmicutes|c__Clostridia|o__Clostridiales|f__Lachnospiraceae|g__Blautia|s__Blautia producta	-1.12382	3.49352	-0.276186	0.335938	0.373922	0.89637	0.352471	0.915064	0.915064		ALDEx2_t
1.60 mg/mL - 0.80 mg/mL	p__Firmicutes|c__Clostridia|o__Clostridiales|f__Lachnospiraceae|g__Eisenbergiella|s__Eisenbergiella tayi	1.08772	3.13941	0.309273	0.347656	0.298704	0.880913	0.325209	0.895824	0.895824		ALDEx2_t
1.60 mg/mL - 0.80 mg/mL	p__Firmicutes|c__Clostridia|o__Clostridiales|f__Oscillospiraceae|g__Oscillibacter|s__Oscillibacter valericigenes	-0.413154	3.68552	-0.0924711	0.441406	0.609556	0.930078	0.701746	0.958902	0.958902		ALDEx2_t
1.60 mg/mL - 0.80 mg/mL	p__Firmicutes|c__Clostridia|o__Clostridiales|f__Lachnospiraceae|g__Butyrivibrio|s__Butyrivibrio crossotus	-0.765041	3.34612	-0.202059	0.394531	0.495291	0.91783	0.508086	0.934261	0.934261		ALDEx2_t
1.60 mg/mL - 0.80 mg/mL	p__Bacteroidetes|c__Bacteroidia|o__Bacteroidales|f__Rikenellaceae|g__Alistipes|s__Alistipes senegalensis	-0.741529	5.48192	-0.129265	0.425781	0.519428	0.909951	0.599461	0.941252	0.941252		ALDEx2_t
1.60 mg/mL - 0.80 mg/mL	p__Firmicutes|c__Clostridia|o__Clostridiales|f__Hungateiclostridiaceae|g__Hungateiclostridium|s__Hungateiclostridium saccincola	-2.48741	3.423	-0.646062	0.196881	0.14561	0.806733	0.05264	0.742327	0.742327		ALDEx2_t
1.60 mg/mL - 0.80 mg/mL	p__Firmicutes|c__Clostridia|o__Clostridiales|f__Clostridiaceae|g__Clostridium|s__Clostridium merdae	0.616346	5.81952	0.0909788	0.452242	0.652673	0.940082	0.709656	0.961122	0.961122		ALDEx2_t
1.60 mg/mL - 0.80 mg/mL	p__Firmicutes|c__Clostridia|o__Clostridiales|f__Clostridiaceae|g__Clostridium|s__Clostridium sp. SY8519	-0.64034	5.40529	-0.101816	0.444444	0.606526	0.93177	0.664856	0.951808	0.951808		ALDEx2_t
1.60 mg/mL - 0.80 mg/mL	p__Firmicutes|c__Clostridia|o__Clostridiales|f__Lachnospiraceae|g__Enterocloster|s__Enterocloster bolteae	-0.621509	3.2744	-0.151033	0.403509	0.592268	0.930239	0.555089	0.936051	0.936051		ALDEx2_t
1.60 mg/mL - 0.80 mg/mL	p__Firmicutes|c__Clostridia|o__Clostridiales|f__Hungateiclostridiaceae|g__Hungateiclostridium|s__Hungateiclostridium cellulolyticum	-0.357354	4.47758	-0.0822336	0.457031	0.620109	0.933223	0.688825	0.959179	0.959179		ALDEx2_t
1.60 mg/mL - 0.80 mg/mL	p__Firmicutes|c__Clostridia|o__Clostridiales|f__Clostridiaceae|g__Clostridium|s__Clostridium botulinum	0.345938	5.062	0.0618808	0.463938	0.562423	0.923126	0.614843	0.947787	0.947787		ALDEx2_t
1.60 mg/mL - 0.80 mg/mL	p__Bacteroidetes|c__Bacteroidia|o__Bacteroidales|f__Muribaculaceae|g__Duncaniella|s__Duncaniella sp. B8	0.69012	6.15788	0.0980353	0.442495	0.571798	0.923422	0.573742	0.93828	0.93828		ALDEx2_t
1.60 mg/mL - 0.80 mg/mL	p__Firmicutes|c__Clostridia|o__Clostridiales|f__Hungateiclostridiaceae|g__Ruminiclostridium|s__Ruminiclostridium cellobioparum	-2.48322	4.40996	-0.539897	0.231969	0.157447	0.80337	0.094226	0.77441	0.77441		ALDEx2_t
1.60 mg/mL - 0.80 mg/mL	p__Firmicutes|c__Clostridia|o__Clostridiales|f__Lachnospiraceae|g__Mediterraneibacter|s__[Ruminococcus] gnavus	-0.881949	4.00815	-0.194666	0.404297	0.59062	0.923081	0.545628	0.939141	0.939141		ALDEx2_t
1.60 mg/mL - 0.80 mg/mL	p__Firmicutes|c__Clostridia|o__Clostridiales|f__Ruminococcaceae|g__Acutalibacter|s__Acutalibacter muris	1.79993	4.63879	0.365393	0.332031	0.299478	0.860969	0.310368	0.849603	0.849603		ALDEx2_t
1.60 mg/mL - 0.80 mg/mL	p__Bacteroidetes|c__Bacteroidia|o__Bacteroidales|f__Rikenellaceae|g__Alistipes|s__Alistipes communis	-1.60781	6.14216	-0.223282	0.387914	0.368236	0.888331	0.456437	0.90379	0.90379		ALDEx2_t
1.60 mg/mL - 0.80 mg/mL	p__Firmicutes|c__Clostridia|o__Clostridiales|f__Ruminococcaceae|g__Ruminococcus|s__Ruminococcus bicirculans	-0.119597	4.72744	-0.0160654	0.48538	0.619798	0.929086	0.672066	0.95393	0.95393		ALDEx2_t
1.60 mg/mL - 0.80 mg/mL	p__Firmicutes|c__Clostridia|o__Clostridiales|f__Lachnospiraceae|g__Lachnoclostridium|s__[Clostridium] populeti	0.790771	3.82348	0.185968	0.394531	0.551134	0.919627	0.550222	0.936189	0.936189		ALDEx2_t
1.60 mg/mL - 0.80 mg/mL	p__Firmicutes|c__Clostridia|o__Clostridiales|f__Lachnospiraceae|g__Anaerocolumna|s__Anaerocolumna cellulosilytica	-1.07029	4.20235	-0.201344	0.404297	0.50876	0.910732	0.536204	0.934749	0.934749		ALDEx2_t
1.60 mg/mL - 0.80 mg/mL	p__Firmicutes|c__Clostridia|o__Clostridiales|f__Lachnospiraceae|g__Lachnospira|s__Lachnospira eligens	0.404884	2.83988	0.10355	0.419103	0.545546	0.921963	0.545909	0.923233	0.923233		ALDEx2_t
1.60 mg/mL - 0.80 mg/mL	p__Firmicutes|c__Erysipelotrichia|o__Erysipelotrichales|f__Erysipelotrichaceae|g__Turicibacter|s__Turicibacter sp. H121	0.0688207	5.80637	0.0134066	0.491228	0.650104	0.935074	0.713451	0.961017	0.961017		ALDEx2_t
1.60 mg/mL - 0.80 mg/mL	p__Firmicutes|c__Clostridia|o__Clostridiales|f__Lachnospiraceae|g__Lacrimispora|s__Lacrimispora indolis	0.94005	3.58761	0.240877	0.367188	0.408384	0.899459	0.481088	0.925956	0.925956		ALDEx2_t
1.60 mg/mL - 0.80 mg/mL	p__Firmicutes|c__Clostridia|o__Clostridiales|f__Lachnospiraceae|g__|s__Lachnospiraceae bacterium Choco86	0.178091	4.58814	0.0292014	0.482422	0.60978	0.935077	0.709281	0.960144	0.960144		ALDEx2_t
1.60 mg/mL - 0.80 mg/mL	p__Firmicutes|c__Clostridia|o__Clostridiales|f__Catabacteriaceae|g__Catabacter|s__Catabacter hongkongensis	0.971126	4.90352	0.164083	0.430799	0.570941	0.926233	0.617264	0.94745	0.94745		ALDEx2_t
1.60 mg/mL - 0.80 mg/mL	p__Firmicutes|c__Clostridia|o__Clostridiales|f__Christensenellaceae|g__Christensenella|s__Christensenella timonensis	0.312365	5.28541	0.0557688	0.481481	0.659533	0.937705	0.739493	0.964155	0.964155		ALDEx2_t
1.60 mg/mL - 0.80 mg/mL	p__Firmicutes|c__Clostridia|o__Clostridiales|f__Peptostreptococcaceae|g__Romboutsia|s__Romboutsia timonensis	-0.340752	5.48102	-0.0538563	0.473684	0.566383	0.920113	0.626614	0.944923	0.944923		ALDEx2_t
1.60 mg/mL - 0.80 mg/mL	p__Firmicutes|c__Clostridia|o__Clostridiales|f__Lachnospiraceae|g__Lacrimispora|s__Lacrimispora celerecrescens	0.211119	4.71089	0.0388031	0.484375	0.631344	0.933331	0.711199	0.9599	0.9599		ALDEx2_t
1.60 mg/mL - 0.80 mg/mL	p__Firmicutes|c__Clostridia|o__Clostridiales|f__Lachnospiraceae|g__Robinsoniella|s__Robinsoniella peoriensis	0.777147	3.82957	0.172145	0.415205	0.469991	0.913756	0.506409	0.930134	0.930134		ALDEx2_t
1.60 mg/mL - 0.80 mg/mL	p__Firmicutes|c__Clostridia|o__Clostridiales|f__Ruminococcaceae|g__Pseudoflavonifractor|s__Pseudoflavonifractor capillosus	-1.8765	4.28513	-0.35884	0.311891	0.353903	0.868111	0.275902	0.863796	0.863796		ALDEx2_t
1.60 mg/mL - 0.80 mg/mL	p__Candidatus Melainabacteria|c__|o__Vampirovibrionales|f__|g__Vampirovibrio|s__Vampirovibrio chlorellavorus	-1.57726	5.87419	-0.263503	0.385965	0.342055	0.882159	0.431978	0.904181	0.904181		ALDEx2_t
1.60 mg/mL - 0.80 mg/mL	p__Firmicutes|c__Clostridia|o__Clostridiales|f__Lachnospiraceae|g__Faecalicatena|s__Faecalicatena orotica	-0.0211912	4.16396	-0.00383792	0.498047	0.62506	0.934562	0.687671	0.95929	0.95929		ALDEx2_t
1.60 mg/mL - 0.80 mg/mL	p__Firmicutes|c__Clostridia|o__Clostridiales|f__Clostridiaceae|g__Clostridium|s__Clostridium tarantellae	2.05066	5.13026	0.369617	0.335938	0.312319	0.876	0.332992	0.891691	0.891691		ALDEx2_t
1.60 mg/mL - 0.80 mg/mL	p__Firmicutes|c__Clostridia|o__Clostridiales|f__Lachnospiraceae|g__Blautia|s__Blautia sp. SC05B48	-1.01856	3.69539	-0.219748	0.37232	0.518255	0.913714	0.490922	0.929758	0.929758		ALDEx2_t
1.60 mg/mL - 0.80 mg/mL	p__Firmicutes|c__Erysipelotrichia|o__Erysipelotrichales|f__Erysipelotrichaceae|g__Breznakia|s__Breznakia pachnodae	0.612438	4.57138	0.111125	0.451172	0.610704	0.935162	0.656068	0.95351	0.95351		ALDEx2_t
1.60 mg/mL - 0.80 mg/mL	p__Bacteroidetes|c__Bacteroidia|o__Bacteroidales|f__Rikenellaceae|g__Alistipes|s__Alistipes putredinis	-0.321218	5.10346	-0.0692177	0.465887	0.562254	0.927442	0.608647	0.945532	0.945532		ALDEx2_t
1.60 mg/mL - 0.80 mg/mL	p__Firmicutes|c__Clostridia|o__Clostridiales|f__Lachnospiraceae|g__Anaerostipes|s__Anaerostipes hadrus	1.38946	3.7575	0.332343	0.333333	0.323316	0.87579	0.312754	0.878873	0.878873		ALDEx2_t
1.60 mg/mL - 0.80 mg/mL	p__Firmicutes|c__Clostridia|o__Clostridiales|f__Lachnospiraceae|g__Lacrimispora|s__Lacrimispora amygdalina	2.26524	3.76181	0.550311	0.247563	0.156697	0.828719	0.108636	0.786223	0.786223		ALDEx2_t
1.60 mg/mL - 0.80 mg/mL	p__Firmicutes|c__Clostridia|o__Clostridiales|f__Ruminococcaceae|g__Paludicola|s__Paludicola psychrotolerans	-1.54004	3.95852	-0.344725	0.317739	0.372399	0.874783	0.299412	0.861789	0.861789		ALDEx2_t
1.60 mg/mL - 0.80 mg/mL	p__Firmicutes|c__Clostridia|o__Clostridiales|f__Lachnospiraceae|g__Roseburia|s__Roseburia intestinalis	-0.428042	4.48474	-0.084041	0.462891	0.604993	0.9295	0.650417	0.952147	0.952147		ALDEx2_t
1.60 mg/mL - 0.80 mg/mL	p__Firmicutes|c__Clostridia|o__Clostridiales|f__Lachnospiraceae|g__Anaerostipes|s__Anaerostipes butyraticus	0.531213	3.6246	0.113055	0.429688	0.508021	0.916684	0.547646	0.940687	0.940687		ALDEx2_t
1.60 mg/mL - 0.80 mg/mL	p__Bacteroidetes|c__Bacteroidia|o__Bacteroidales|f__Rikenellaceae|g__Alistipes|s__Alistipes megaguti	-0.655558	4.7938	-0.131729	0.449219	0.623329	0.936594	0.660566	0.956369	0.956369		ALDEx2_t
1.60 mg/mL - 0.80 mg/mL	p__Firmicutes|c__Clostridia|o__Clostridiales|f__Ruminococcaceae|g__Acetivibrio|s__Acetivibrio ethanolgignens	0.97631	3.47248	0.265776	0.355469	0.414013	0.903443	0.43812	0.912129	0.912129		ALDEx2_t
1.60 mg/mL - 0.80 mg/mL	p__Bacteroidetes|c__Bacteroidia|o__Bacteroidales|f__Rikenellaceae|g__Alistipes|s__Alistipes finegoldii	-1.34487	4.95886	-0.245818	0.361328	0.387327	0.887243	0.434598	0.892341	0.892341		ALDEx2_t
1.60 mg/mL - 0.80 mg/mL	p__Firmicutes|c__Clostridia|o__Clostridiales|f__Clostridiaceae|g__Clostridium|s__Clostridium saudiense	0.708211	4.51984	0.132872	0.436647	0.486869	0.915111	0.566469	0.939463	0.939463		ALDEx2_t
1.60 mg/mL - 0.80 mg/mL	p__Firmicutes|c__Clostridia|o__Clostridiales|f__Peptostreptococcaceae|g__Clostridioides|s__Clostridioides difficile	0.563475	5.20584	0.093551	0.464844	0.560828	0.922077	0.598227	0.936089	0.936089		ALDEx2_t
1.60 mg/mL - 0.80 mg/mL	p__Firmicutes|c__Clostridia|o__Clostridiales|f__Clostridiaceae|g__Clostridium|s__Clostridium sp. JN-9	0.658685	4.90612	0.121178	0.443359	0.567638	0.92043	0.574574	0.936228	0.936228		ALDEx2_t
1.60 mg/mL - 0.80 mg/mL	p__Firmicutes|c__Clostridia|o__Clostridiales|f__Oscillospiraceae|g__Oscillibacter|s__Oscillibacter sp. PEA192	-0.768087	4.57333	-0.137167	0.432749	0.560915	0.919301	0.614616	0.938723	0.938723		ALDEx2_t
1.60 mg/mL - 0.80 mg/mL	p__Bacteroidetes|c__Bacteroidia|o__Bacteroidales|f__Rikenellaceae|g__Alistipes|s__Alistipes onderdonkii	-0.780605	5.14097	-0.132494	0.42885	0.492086	0.909956	0.533862	0.919922	0.919922		ALDEx2_t
1.60 mg/mL - 0.80 mg/mL	p__Firmicutes|c__Clostridia|o__Clostridiales|f__Hungateiclostridiaceae|g__Anaerobacterium|s__Anaerobacterium chartisolvens	0.0652178	4.33485	0.0110646	0.496094	0.612268	0.929128	0.661685	0.950504	0.950504		ALDEx2_t
1.60 mg/mL - 0.80 mg/mL	p__Firmicutes|c__Clostridia|o__Clostridiales|f__Hungateiclostridiaceae|g__|s__Hungateiclostridiaceae bacterium KB18	1.63815	4.18577	0.345289	0.348928	0.353966	0.866749	0.349919	0.859833	0.859833		ALDEx2_t
1.60 mg/mL - 0.80 mg/mL	p__Tenericutes|c__Mollicutes|o__Entomoplasmatales|f__Spiroplasmataceae|g__Spiroplasma|s__Spiroplasma syrphidicola	-0.539988	4.76763	-0.102236	0.447266	0.569343	0.927091	0.571887	0.941327	0.941327		ALDEx2_t
1.60 mg/mL - 0.80 mg/mL	p__Firmicutes|c__Clostridia|o__Clostridiales|f__Lachnospiraceae|g__Lachnoclostridium|s__[Clostridium] polysaccharolyticum	-0.221974	4.11146	-0.0395406	0.471735	0.526632	0.920923	0.592087	0.94459	0.94459		ALDEx2_t
1.60 mg/mL - 0.80 mg/mL	p__Firmicutes|c__Clostridia|o__Clostridiales|f__|g__Colidextribacter|s__Colidextribacter massiliensis	0.0215274	3.72446	0.00336352	0.498047	0.581616	0.921115	0.651595	0.947657	0.947657		ALDEx2_t
1.60 mg/mL - 0.80 mg/mL	p__Firmicutes|c__Clostridia|o__Clostridiales|f__Clostridiaceae|g__Clostridium|s__Clostridium ventriculi	1.01656	4.86836	0.173775	0.407407	0.498004	0.903115	0.498615	0.913821	0.913821		ALDEx2_t
1.60 mg/mL - 0.80 mg/mL	p__Firmicutes|c__Clostridia|o__Clostridiales|f__Lachnospiraceae|g__Bariatricus|s__Bariatricus massiliensis	1.33632	3.78028	0.299264	0.349609	0.382465	0.878307	0.354576	0.86444	0.86444		ALDEx2_t
1.60 mg/mL - 0.80 mg/mL	p__Firmicutes|c__Clostridia|o__Clostridiales|f__Lachnospiraceae|g__Anaerotignum|s__Anaerotignum lactatifermentans	-0.139746	4.52598	-0.0216248	0.48538	0.575196	0.923992	0.636265	0.948578	0.948578		ALDEx2_t
1.60 mg/mL - 0.80 mg/mL	p__Firmicutes|c__Clostridia|o__Clostridiales|f__Hungateiclostridiaceae|g__Ruminiclostridium|s__Ruminiclostridium cellulolyticum	-1.17143	4.32229	-0.232489	0.384766	0.429417	0.895288	0.440777	0.906201	0.906201		ALDEx2_t
1.60 mg/mL - 0.80 mg/mL	p__Firmicutes|c__Clostridia|o__Clostridiales|f__Lachnospiraceae|g__Schaedlerella|s__Schaedlerella arabinosiphila	-0.30751	4.29052	-0.0710034	0.463938	0.544719	0.923109	0.588736	0.940922	0.940922		ALDEx2_t
1.60 mg/mL - 0.80 mg/mL	p__Firmicutes|c__Clostridia|o__Clostridiales|f__Ruminococcaceae|g__Caproiciproducens|s__Caproiciproducens galactitolivorans	1.01612	4.70913	0.198969	0.415205	0.518793	0.918441	0.549646	0.935033	0.935033		ALDEx2_t
1.60 mg/mL - 0.80 mg/mL	p__Firmicutes|c__Erysipelotrichia|o__Erysipelotrichales|f__Erysipelotrichaceae|g__Faecalitalea|s__Faecalitalea cylindroides	0.135458	4.40263	0.0268452	0.484375	0.560322	0.922434	0.608968	0.946451	0.946451		ALDEx2_t
1.60 mg/mL - 0.80 mg/mL	p__Firmicutes|c__Clostridia|o__Clostridiales|f__Lachnospiraceae|g__Lacrimispora|s__Lacrimispora algidixylanolytica	-0.21582	3.24239	-0.0549159	0.470703	0.523474	0.919303	0.576588	0.941721	0.941721		ALDEx2_t
1.60 mg/mL - 0.80 mg/mL	p__Firmicutes|c__Clostridia|o__Clostridiales|f__Eubacteriaceae|g__Eubacterium|s__Eubacterium oxidoreducens	-0.596688	4.10162	-0.124234	0.444444	0.514754	0.914557	0.584718	0.936064	0.936064		ALDEx2_t
1.60 mg/mL - 0.80 mg/mL	p__Firmicutes|c__Clostridia|o__Clostridiales|f__|g__Monoglobus|s__Monoglobus pectinilyticus	-0.902267	4.29933	-0.173462	0.402344	0.499002	0.911879	0.548323	0.931474	0.931474		ALDEx2_t
1.60 mg/mL - 0.80 mg/mL	p__Firmicutes|c__Clostridia|o__Clostridiales|f__|g__Intestinimonas|s__Intestinimonas butyriciproducens	0.173034	4.01198	0.034979	0.481481	0.537397	0.920272	0.604671	0.94077	0.94077		ALDEx2_t
1.60 mg/mL - 0.80 mg/mL	p__Firmicutes|c__Clostridia|o__Clostridiales|f__Lachnospiraceae|g__|s__Lachnospiraceae bacterium oral taxon 500	1.21998	4.68587	0.237161	0.371094	0.42911	0.907158	0.45334	0.915674	0.915674		ALDEx2_t
1.60 mg/mL - 0.80 mg/mL	p__Firmicutes|c__Clostridia|o__Clostridiales|f__|g__Ihubacter|s__Ihubacter massiliensis	-0.259157	4.10767	-0.0517161	0.472656	0.532319	0.919754	0.568213	0.932075	0.932075		ALDEx2_t
1.60 mg/mL - 0.80 mg/mL	p__Firmicutes|c__Clostridia|o__Clostridiales|f__Lachnospiraceae|g__Parasporobacterium|s__Parasporobacterium paucivorans	-0.665294	4.00985	-0.124079	0.42885	0.512072	0.909163	0.546374	0.924333	0.924333		ALDEx2_t
1.60 mg/mL - 0.80 mg/mL	p__Firmicutes|c__Clostridia|o__Clostridiales|f__Ruminococcaceae|g__Faecalibacterium|s__Faecalibacterium prausnitzii	-0.459666	4.46117	-0.0957644	0.452242	0.542299	0.918847	0.589427	0.936623	0.936623		ALDEx2_t
1.60 mg/mL - 0.80 mg/mL	p__Firmicutes|c__Clostridia|o__Clostridiales|f__Hungateiclostridiaceae|g__Hungateiclostridium|s__Hungateiclostridium clariflavum	-0.0445988	4.30135	-0.00831447	0.492188	0.501787	0.917425	0.544891	0.939076	0.939076		ALDEx2_t
1.60 mg/mL - 0.80 mg/mL	p__Tenericutes|c__Mollicutes|o__Entomoplasmatales|f__Spiroplasmataceae|g__Spiroplasma|s__Spiroplasma lampyridicola	0.0186856	4.55722	0.00332981	0.498047	0.535743	0.913943	0.567267	0.934349	0.934349		ALDEx2_t
1.60 mg/mL - 0.80 mg/mL	p__Firmicutes|c__Clostridia|o__Clostridiales|f__Lachnospiraceae|g__Anaerostipes|s__Anaerostipes rhamnosivorans	1.25147	3.95769	0.311512	0.339844	0.388629	0.885094	0.391102	0.878214	0.878214		ALDEx2_t
1.60 mg/mL - 0.80 mg/mL	p__Firmicutes|c__Clostridia|o__Clostridiales|f__Ruminococcaceae|g__Pseudoflavonifractor|s__Pseudoflavonifractor phocaeensis	-0.601303	4.12781	-0.111634	0.432749	0.521876	0.911385	0.53557	0.932909	0.932909		ALDEx2_t
1.60 mg/mL - 0.80 mg/mL	p__Tenericutes|c__Mollicutes|o__Entomoplasmatales|f__Spiroplasmataceae|g__Spiroplasma|s__Spiroplasma chrysopicola	-0.00689515	3.93112	-0.00178828	0.499025	0.546859	0.919035	0.599238	0.946127	0.946127		ALDEx2_t
1.60 mg/mL - 0.80 mg/mL	p__Firmicutes|c__Clostridia|o__Clostridiales|f__Lachnospiraceae|g__Roseburia|s__Roseburia hominis	1.12621	4.02004	0.239063	0.374269	0.421246	0.895183	0.400336	0.895687	0.895687		ALDEx2_t
1.60 mg/mL - 0.80 mg/mL	p__Firmicutes|c__Clostridia|o__Clostridiales|f__Lachnospiraceae|g__Anaerotignum|s__Anaerotignum aminivorans	-0.0169082	4.74218	-0.00404101	0.496094	0.541137	0.918983	0.590837	0.937038	0.937038		ALDEx2_t
1.60 mg/mL - 0.80 mg/mL	p__Firmicutes|c__Clostridia|o__Clostridiales|f__Clostridiaceae|g__Clostridium|s__Clostridium subterminale	1.02431	4.77563	0.195448	0.401559	0.487914	0.911566	0.492239	0.921654	0.921654		ALDEx2_t
1.60 mg/mL - 0.80 mg/mL	p__Firmicutes|c__Clostridia|o__Clostridiales|f__Hungateiclostridiaceae|g__Hungateiclostridium|s__Hungateiclostridium straminisolvens	-0.490772	4.30119	-0.0860735	0.449219	0.492938	0.911492	0.532991	0.933625	0.933625		ALDEx2_t
1.60 mg/mL - 0.80 mg/mL	p__Firmicutes|c__Bacilli|o__Lactobacillales|f__Lactobacillaceae|g__Lactobacillus|s__Lactobacillus rogosae	0.609774	4.02635	0.132159	0.419103	0.477854	0.910706	0.482404	0.916093	0.916093		ALDEx2_t
1.60 mg/mL - 0.80 mg/mL	p__Firmicutes|c__Clostridia|o__Clostridiales|f__Clostridiaceae|g__Falcatimonas|s__Falcatimonas natans	0.498084	4.19074	0.0927557	0.445313	0.502234	0.910093	0.549666	0.936326	0.936326		ALDEx2_t
1.60 mg/mL - 0.80 mg/mL	p__Firmicutes|c__Clostridia|o__Clostridiales|f__Clostridiaceae|g__Clostridium|s__Clostridium beijerinckii	1.16227	4.44506	0.229297	0.390625	0.423224	0.887508	0.431479	0.887309	0.887309		ALDEx2_t
1.60 mg/mL - 0.80 mg/mL	p__Firmicutes|c__Clostridia|o__Clostridiales|f__Lachnospiraceae|g__Blautia|s__Blautia sp. N6H1-15	0.966192	4.33249	0.204559	0.395712	0.409447	0.886336	0.437441	0.890843	0.890843		ALDEx2_t
1.60 mg/mL - 0.80 mg/mL	p__Firmicutes|c__Clostridia|o__Clostridiales|f__Ruminococcaceae|g__Papillibacter|s__Papillibacter cinnamivorans	-0.719938	4.18655	-0.147399	0.431641	0.491242	0.906734	0.511414	0.916763	0.916763		ALDEx2_t
1.60 mg/mL - 0.80 mg/mL	p__Firmicutes|c__Clostridia|o__Clostridiales|f__|g__Massilistercora|s__Massilistercora timonensis	0.921778	4.73727	0.159568	0.414063	0.465586	0.903332	0.478125	0.905353	0.905353		ALDEx2_t
1.60 mg/mL - 0.80 mg/mL	p__Firmicutes|c__Clostridia|o__Clostridiales|f__Clostridiaceae|g__Butyricicoccus|s__Butyricicoccus pullicaecorum	0.346369	4.51642	0.0660612	0.469786	0.584322	0.931368	0.64186	0.952834	0.952834		ALDEx2_t
1.60 mg/mL - 0.80 mg/mL	p__Firmicutes|c__Clostridia|o__Clostridiales|f__Lachnospiraceae|g__Anaerobutyricum|s__Anaerobutyricum hallii	1.17665	3.97908	0.260808	0.359375	0.368193	0.877705	0.387598	0.886328	0.886328		ALDEx2_t
1.60 mg/mL - 0.80 mg/mL	p__Firmicutes|c__Clostridia|o__Clostridiales|f__Clostridiaceae|g__Clostridium|s__Clostridium disporicum	0.89329	4.26702	0.178445	0.404297	0.502619	0.903577	0.48791	0.921206	0.921206		ALDEx2_t
1.60 mg/mL - 0.80 mg/mL	p__Firmicutes|c__Clostridia|o__Clostridiales|f__Peptococcaceae|g__|s__Peptococcaceae bacterium DCMF	0.277944	4.41985	0.0643525	0.469786	0.514581	0.916327	0.554634	0.927158	0.927158		ALDEx2_t
1.60 mg/mL - 0.80 mg/mL	p__Firmicutes|c__Clostridia|o__Clostridiales|f__Peptococcaceae|g__Dehalobacterium|s__Dehalobacterium formicoaceticum	0.680216	4.07284	0.133329	0.421053	0.521603	0.914532	0.532862	0.930321	0.930321		ALDEx2_t
1.60 mg/mL - 0.80 mg/mL	p__Firmicutes|c__Clostridia|o__Clostridiales|f__Ruminococcaceae|g__|s__[Clostridium] methylpentosum	-0.76697	4.01254	-0.162297	0.411306	0.445275	0.904223	0.466085	0.911709	0.911709		ALDEx2_t
1.60 mg/mL - 0.80 mg/mL	p__Firmicutes|c__Clostridia|o__Clostridiales|f__Ruminococcaceae|g__Tepidibaculum|s__Tepidibaculum saccharolyticum	-1.22931	4.44874	-0.252308	0.382813	0.398739	0.890393	0.406169	0.901469	0.901469		ALDEx2_t
1.60 mg/mL - 0.80 mg/mL	p__Firmicutes|c__Clostridia|o__Clostridiales|f__Hungateiclostridiaceae|g__Hungateiclostridium|s__Hungateiclostridium thermocellum	-0.314972	4.07135	-0.0606958	0.466797	0.516255	0.907214	0.588069	0.940895	0.940895		ALDEx2_t
1.60 mg/mL - 0.80 mg/mL	p__Firmicutes|c__Clostridia|o__Clostridiales|f__Lachnospiraceae|g__Anaerocolumna|s__Anaerocolumna xylanovorans	0.722518	4.27666	0.160129	0.417969	0.556096	0.918869	0.571177	0.932289	0.932289		ALDEx2_t
1.60 mg/mL - 0.80 mg/mL	p__Firmicutes|c__Clostridia|o__Clostridiales|f__Lachnospiraceae|g__Lachnoclostridium|s__Lachnoclostridium pacaense	0.811116	4.05543	0.177516	0.404297	0.470518	0.903981	0.46613	0.910612	0.910612		ALDEx2_t
1.60 mg/mL - 0.80 mg/mL	p__Firmicutes|c__Clostridia|o__Clostridiales|f__Ruminococcaceae|g__Hydrogenoanaerobacterium|s__Hydrogenoanaerobacterium saccharovorans	-0.180335	3.97708	-0.0397126	0.476563	0.494028	0.903425	0.543157	0.926984	0.926984		ALDEx2_t
1.60 mg/mL - 0.80 mg/mL	p__Firmicutes|c__Clostridia|o__Clostridiales|f__Lachnospiraceae|g__Faecalicatena|s__Faecalicatena contorta	0.144154	4.04283	0.0321828	0.483431	0.526002	0.912186	0.582334	0.93443	0.93443		ALDEx2_t
1.60 mg/mL - 0.80 mg/mL	p__Firmicutes|c__Clostridia|o__Clostridiales|f__Lachnospiraceae|g__Lachnoclostridium|s__[Clostridium] scindens	0.387685	4.14033	0.0925103	0.460938	0.475919	0.901548	0.504745	0.915844	0.915844		ALDEx2_t
1.60 mg/mL - 0.80 mg/mL	p__Firmicutes|c__Clostridia|o__Clostridiales|f__Lachnospiraceae|g__Marvinbryantia|s__Marvinbryantia formatexigens	0.432646	4.13586	0.0787331	0.455078	0.432533	0.904818	0.477178	0.927438	0.927438		ALDEx2_t
1.60 mg/mL - 0.80 mg/mL	p__Firmicutes|c__Clostridia|o__Clostridiales|f__Ruminococcaceae|g__Negativibacillus|s__Negativibacillus massiliensis	-0.25324	4.38606	-0.0507768	0.471735	0.477737	0.911586	0.520911	0.923522	0.923522		ALDEx2_t
1.60 mg/mL - 0.80 mg/mL	p__Firmicutes|c__Clostridia|o__Clostridiales|f__Ruminococcaceae|g__|s__[Clostridium] viride	-0.40222	4.30567	-0.069933	0.450292	0.519123	0.908804	0.556745	0.932329	0.932329		ALDEx2_t
1.60 mg/mL - 0.80 mg/mL	p__Firmicutes|c__Clostridia|o__Clostridiales|f__Clostridiaceae|g__Hungatella|s__Hungatella xylanolytica	0.402868	4.11239	0.0781872	0.454191	0.53949	0.91584	0.543643	0.92487	0.92487		ALDEx2_t
1.60 mg/mL - 0.80 mg/mL	p__Firmicutes|c__Clostridia|o__Clostridiales|f__Lachnospiraceae|g__Faecalicatena|s__Faecalicatena fissicatena	0.315959	4.49238	0.0344019	0.488281	0.535681	0.915586	0.543148	0.931641	0.931641		ALDEx2_t
1.60 mg/mL - 0.80 mg/mL	p__Firmicutes|c__Clostridia|o__Clostridiales|f__Ruminococcaceae|g__Harryflintia|s__Harryflintia acetispora	-0.079349	4.18489	-0.018367	0.491228	0.519508	0.909961	0.569942	0.931222	0.931222		ALDEx2_t
1.60 mg/mL - 0.80 mg/mL	p__Firmicutes|c__Clostridia|o__Clostridiales|f__|g__|s__Clostridiales bacterium CCNA10	-0.25126	4.04533	-0.0581296	0.467836	0.493972	0.905795	0.519075	0.918246	0.918246		ALDEx2_t
2.50 mg/mL - 6.60 mg/mL	p__Firmicutes|c__Clostridia|o__Clostridiales|f__Lachnospiraceae|g__|s__Lachnospiraceae bacterium GAM79	-0.979839	1.78383	-0.504676	0.265107	0.068999	0.358004	0.0732585	0.335507	0.335507		ALDEx2_t
2.50 mg/mL -6.60 mg/mL	p__Bacteroidetes|c__Bacteroidia|o__Bacteroidales|f__Muribaculaceae|g__Duncaniella|s__Duncaniella sp. B8	5.0147	4.68258	1.04348	0.115235	0.0111588	0.187437	0.00203333	0.0634716	0.0634716		ALDEx2_t
2.50 mg/mL - 6.60 mg/mL	p__Firmicutes|c__Clostridia|o__Clostridiales|f__Lachnospiraceae|g__Lacrimispora|s__Lacrimispora saccharolytica	-1.28994	1.70925	-0.706018	0.230469	0.0216384	0.234597	0.0305884	0.233718	0.233718		ALDEx2_t
2.50 mg/mL -6.60 mg/mL	p__Firmicutes|c__Clostridia|o__Clostridiales|f__Lachnospiraceae|g__Eisenbergiella|s__Eisenbergiella massiliensis	-0.493246	1.0446	-0.400698	0.329435	0.303039	0.63237	0.216992	0.524715	0.524715		ALDEx2_t
2.50 mg/mL - 6.60 mg/mL	p__Firmicutes|c__Clostridia|o__Clostridiales|f__Oscillospiraceae|g__Dysosmobacter|s__Dysosmobacter welbionis	0.647707	1.5862	0.401119	0.346979	0.227972	0.568847	0.250773	0.568681	0.568681		ALDEx2_t
2.50 mg/mL -6.60 mg/mL	p__Bacteroidetes|c__Bacteroidia|o__Bacteroidales|f__Muribaculaceae|g__Muribaculum|s__Muribaculum intestinale	2.72519	3.94583	0.610483	0.224172	0.0595057	0.33828	0.034947	0.241962	0.241962		ALDEx2_t
2.50 mg/mL - 6.60 mg/mL	p__Firmicutes|c__Clostridia|o__Clostridiales|f__|g__Flintibacter|s__Flintibacter sp. KGMB00164	-0.0773358	1.25488	-0.0561632	0.480469	0.810141	0.923276	0.81771	0.927717	0.927717		ALDEx2_t
2.50 mg/mL -6.60 mg/mL	p__Firmicutes|c__Clostridia|o__Clostridiales|f__Lachnospiraceae|g__Anaerotaenia|s__Anaerotaenia torta	0.498873	1.27062	0.341958	0.359375	0.380891	0.676248	0.323223	0.616623	0.616623		ALDEx2_t
2.50 mg/mL - 6.60 mg/mL	p__Firmicutes|c__Clostridia|o__Clostridiales|f__Oscillospiraceae|g__Oscillibacter|s__Oscillibacter valericigenes	0.421766	1.30874	0.301533	0.363281	0.300171	0.600393	0.352722	0.628195	0.628195		ALDEx2_t
2.50 mg/mL -6.60 mg/mL	p__Firmicutes|c__Clostridia|o__Clostridiales|f__Lachnospiraceae|g__Lachnoclostridium|s__Lachnoclostridium phytofermentans	0.354988	1.52232	0.226238	0.402344	0.424239	0.711295	0.464591	0.726656	0.726656		ALDEx2_t
2.50 mg/mL - 6.60 mg/mL	p__Firmicutes|c__Clostridia|o__Clostridiales|f__Ruminococcaceae|g__Flavonifractor|s__Flavonifractor plautii	-0.467568	2.2087	-0.230717	0.398438	0.467611	0.74339	0.445999	0.729781	0.729781		ALDEx2_t
2.50 mg/mL -6.60 mg/mL	p__Firmicutes|c__Clostridia|o__Clostridiales|f__Ruminococcaceae|g__Anaerotruncus|s__Anaerotruncus rubiinfantis	0.217509	1.45123	0.0949112	0.440546	0.6867	0.865927	0.662206	0.846305	0.846305		ALDEx2_t
2.50 mg/mL - 6.60 mg/mL	p__Firmicutes|c__Clostridia|o__Clostridiales|f__Clostridiaceae|g__Hungatella|s__Hungatella hathewayi	-0.272183	1.11578	-0.20361	0.425781	0.73675	0.884593	0.540877	0.778812	0.778812		ALDEx2_t
2.50 mg/mL -6.60 mg/mL	p__Verrucomicrobia|c__Verrucomicrobiae|o__Verrucomicrobiales|f__Akkermansiaceae|g__Akkermansia|s__Akkermansia muciniphila	3.20511	5.81483	0.536695	0.263672	0.126048	0.417879	0.104336	0.371222	0.371222		ALDEx2_t
2.50 mg/mL - 6.60 mg/mL	p__Firmicutes|c__Clostridia|o__Clostridiales|f__Lachnospiraceae|g__Kineothrix|s__Kineothrix alysoides	-0.274147	1.1858	-0.19908	0.392578	0.470519	0.734137	0.527432	0.752815	0.752815		ALDEx2_t
2.50 mg/mL -6.60 mg/mL	p__Firmicutes|c__Clostridia|o__Clostridiales|f__Lachnospiraceae|g__Lacrimispora|s__Lacrimispora sphenoides	-1.20037	1.94832	-0.594389	0.2846	0.0508223	0.306354	0.0819777	0.343813	0.343813		ALDEx2_t
2.50 mg/mL - 6.60 mg/mL	p__Firmicutes|c__Clostridia|o__Clostridiales|f__Clostridiaceae|g__Clostridium|s__Clostridium sp. BNL1100	-2.01246	1.72902	-1.05374	0.107213	0.00146077	0.0786965	0.00254869	0.0646305	0.0646305		ALDEx2_t
2.50 mg/mL -6.60 mg/mL	p__Firmicutes|c__Clostridia|o__Clostridiales|f__Eubacteriaceae|g__Eubacterium|s__Eubacterium ventriosum	-1.12764	2.2476	-0.523266	0.300781	0.0853951	0.37726	0.159324	0.45299	0.45299		ALDEx2_t
2.50 mg/mL - 6.60 mg/mL	p__Firmicutes|c__Clostridia|o__Clostridiales|f__Lachnospiraceae|g__Acetatifactor|s__Acetatifactor muris	0.385209	1.9393	0.19503	0.419922	0.624602	0.832158	0.570071	0.800246	0.800246		ALDEx2_t
2.50 mg/mL -6.60 mg/mL	p__Firmicutes|c__Clostridia|o__Clostridiales|f__Ruminococcaceae|g__Phocea|s__Phocea massiliensis	-0.506715	1.71761	-0.262397	0.373047	0.283991	0.616489	0.403824	0.68305	0.68305		ALDEx2_t
2.50 mg/mL - 6.60 mg/mL	p__Firmicutes|c__Clostridia|o__Clostridiales|f__Lachnospiraceae|g__Herbinix|s__Herbinix luporum	0.571389	1.52077	0.320721	0.349609	0.32292	0.629094	0.309127	0.601223	0.601223		ALDEx2_t
2.50 mg/mL -6.60 mg/mL	p__Firmicutes|c__Clostridia|o__Clostridiales|f__Eubacteriaceae|g__Eubacterium|s__Eubacterium coprostanoligenes	-1.1799	2.74641	-0.329208	0.34308	0.481435	0.732503	0.251774	0.570903	0.570903		ALDEx2_t
2.50 mg/mL - 6.60 mg/mL	p__Firmicutes|c__Clostridia|o__Clostridiales|f__Lachnospiraceae|g__Faecalimonas|s__Faecalimonas umbilicata	0.00444932	1.98256	0.00270682	0.496094	0.761699	0.89731	0.781469	0.907916	0.907916		ALDEx2_t
2.50 mg/mL -6.60 mg/mL	p__Firmicutes|c__Clostridia|o__Clostridiales|f__Christensenellaceae|g__Christensenella|s__Christensenella massiliensis	0.864214	2.4627	0.307691	0.359375	0.245477	0.585056	0.303449	0.60802	0.60802		ALDEx2_t
2.50 mg/mL - 6.60 mg/mL	p__Firmicutes|c__Clostridia|o__Clostridiales|f__Lachnospiraceae|g__Lachnoclostridium|s__Lachnoclostridium sp. YL32	0.240346	1.4478	0.114058	0.435547	0.526329	0.775016	0.629357	0.83091	0.83091		ALDEx2_t
2.50 mg/mL -6.60 mg/mL	p__Firmicutes|c__Clostridia|o__Clostridiales|f__Lachnospiraceae|g__Enterocloster|s__Enterocloster bolteae	0.110626	1.58574	0.0647053	0.463938	0.695396	0.863576	0.695054	0.866895	0.866895		ALDEx2_t
2.50 mg/mL - 6.60 mg/mL	p__Firmicutes|c__Clostridia|o__Clostridiales|f__Ruminococcaceae|g__Pseudoflavonifractor|s__Pseudoflavonifractor phocaeensis	0.50092	2.97492	0.151052	0.442495	0.68306	0.855302	0.646617	0.842278	0.842278		ALDEx2_t
2.50 mg/mL -6.60 mg/mL	p__Firmicutes|c__Clostridia|o__Clostridiales|f__Christensenellaceae|g__Christensenella|s__Christensenella minuta	-0.0872597	2.65959	-0.0288612	0.483431	0.767452	0.900372	0.840202	0.937675	0.937675		ALDEx2_t
2.50 mg/mL - 6.60 mg/mL	p__Firmicutes|c__Clostridia|o__Clostridiales|f__Lachnospiraceae|g__Butyrivibrio|s__Butyrivibrio crossotus	-0.0745132	1.52194	-0.0377644	0.481481	0.706481	0.867197	0.713982	0.869223	0.869223		ALDEx2_t
2.50 mg/mL -6.60 mg/mL	p__Firmicutes|c__Clostridia|o__Clostridiales|f__Oscillospiraceae|g__Oscillibacter|s__Oscillibacter sp. PEA192	0.697434	1.90246	0.27577	0.359375	0.342765	0.644985	0.342433	0.626586	0.626586		ALDEx2_t
2.50 mg/mL - 6.60 mg/mL	p__Firmicutes|c__Clostridia|o__Clostridiales|f__Lachnospiraceae|g__Blautia|s__Blautia producta	-0.764359	1.67552	-0.371694	0.318359	0.482818	0.712897	0.187446	0.484535	0.484535		ALDEx2_t
2.50 mg/mL -6.60 mg/mL	p__Firmicutes|c__Clostridia|o__Clostridiales|f__Lachnospiraceae|g__Blautia|s__Blautia sp. YL58	-1.57019	2.42551	-0.557573	0.216797	0.025806	0.232234	0.0491179	0.256033	0.256033		ALDEx2_t
2.50 mg/mL - 6.60 mg/mL	p__Firmicutes|c__Clostridia|o__Clostridiales|f__Ruminococcaceae|g__|s__[Eubacterium] siraeum	-0.179053	3.62882	-0.0398194	0.480469	0.63926	0.835241	0.754248	0.896735	0.896735		ALDEx2_t
2.50 mg/mL -6.60 mg/mL	p__Firmicutes|c__Clostridia|o__Clostridiales|f__Catabacteriaceae|g__Catabacter|s__Catabacter hongkongensis	0.682748	3.05833	0.180319	0.412109	0.48695	0.745369	0.479276	0.73833	0.73833		ALDEx2_t
2.50 mg/mL - 6.60 mg/mL	p__Firmicutes|c__Clostridia|o__Clostridiales|f__Lachnospiraceae|g__Anaerotignum|s__Anaerotignum lactatifermentans	2.0098	2.96445	0.595826	0.216374	0.0962272	0.378357	0.042685	0.235314	0.235314		ALDEx2_t
2.50 mg/mL -6.60 mg/mL	p__Firmicutes|c__Clostridia|o__Clostridiales|f__Lachnospiraceae|g__Faecalicatena|s__Faecalicatena orotica	0.73709	2.07864	0.299311	0.373047	0.316533	0.624272	0.315221	0.595985	0.595985		ALDEx2_t
2.50 mg/mL - 6.60 mg/mL	p__Firmicutes|c__Clostridia|o__Clostridiales|f__|g__Intestinimonas|s__Intestinimonas butyriciproducens	0.868747	2.13392	0.313873	0.335938	0.285341	0.606916	0.311888	0.596008	0.596008		ALDEx2_t
2.50 mg/mL -6.60 mg/mL	p__Firmicutes|c__Clostridia|o__Clostridiales|f__Lachnospiraceae|g__Anaerocolumna|s__Anaerocolumna cellulosilytica	0.653442	2.32029	0.236766	0.37232	0.231095	0.56786	0.371985	0.646805	0.646805		ALDEx2_t
2.50 mg/mL - 6.60 mg/mL	p__Firmicutes|c__Clostridia|o__Clostridiales|f__Ruminococcaceae|g__Paludicola|s__Paludicola psychrotolerans	-0.110544	2.99113	-0.0374997	0.482422	0.663529	0.853368	0.766322	0.903187	0.903187		ALDEx2_t
2.50 mg/mL -6.60 mg/mL	p__Firmicutes|c__Clostridia|o__Clostridiales|f__Eubacteriaceae|g__Eubacterium|s__Eubacterium xylanophilum	-0.565323	3.61111	-0.120586	0.402344	0.448308	0.700168	0.561331	0.78832	0.78832		ALDEx2_t
2.50 mg/mL - 6.60 mg/mL	p__Firmicutes|c__Clostridia|o__Clostridiales|f__Lachnospiraceae|g__Robinsoniella|s__Robinsoniella peoriensis	0.108086	3.12265	0.0299238	0.484375	0.690079	0.859473	0.761855	0.897175	0.897175		ALDEx2_t
2.50 mg/mL -6.60 mg/mL	p__Firmicutes|c__Clostridia|o__Clostridiales|f__Clostridiaceae|g__Clostridium|s__Clostridium sp. SY8519	0.727326	2.67251	0.203773	0.374269	0.489297	0.743568	0.421331	0.679811	0.679811		ALDEx2_t
2.50 mg/mL - 6.60 mg/mL	p__Firmicutes|c__Clostridia|o__Clostridiales|f__Lachnospiraceae|g__Lacrimispora|s__Lacrimispora indolis	-0.612529	2.03606	-0.24756	0.384016	0.519705	0.749268	0.371936	0.649018	0.649018		ALDEx2_t
2.50 mg/mL -6.60 mg/mL	p__Firmicutes|c__Clostridia|o__Clostridiales|f__Ruminococcaceae|g__Pseudoflavonifractor|s__Pseudoflavonifractor capillosus	0.11322	3.01769	0.0247055	0.481481	0.703757	0.867358	0.785947	0.913182	0.913182		ALDEx2_t
2.50 mg/mL - 6.60 mg/mL	p__Firmicutes|c__Clostridia|o__Clostridiales|f__Lachnospiraceae|g__Eisenbergiella|s__Eisenbergiella tayi	0.0207777	2.82999	0.00826646	0.496094	0.656199	0.845204	0.750419	0.894327	0.894327		ALDEx2_t
2.50 mg/mL -6.60 mg/mL	p__Firmicutes|c__Clostridia|o__Clostridiales|f__Clostridiaceae|g__Geosporobacter|s__Geosporobacter ferrireducens	0.124645	4.38091	0.0233819	0.484375	0.647857	0.835521	0.725408	0.879178	0.879178		ALDEx2_t
2.50 mg/mL - 6.60 mg/mL	p__Firmicutes|c__Clostridia|o__Clostridiales|f__Peptostreptococcaceae|g__Romboutsia|s__Romboutsia ilealis	-4.16488	4.54691	-0.85365	0.15625	0.0353695	0.218228	0.0168322	0.141063	0.141063		ALDEx2_t
2.50 mg/mL -6.60 mg/mL	p__Bacteroidetes|c__Bacteroidia|o__Bacteroidales|f__Rikenellaceae|g__Alistipes|s__Alistipes senegalensis	-2.13032	5.65695	-0.317895	0.341131	0.287379	0.585092	0.320128	0.59024	0.59024		ALDEx2_t
2.50 mg/mL - 6.60 mg/mL	p__Firmicutes|c__Clostridia|o__Clostridiales|f__Lachnospiraceae|g__Lachnoclostridium|s__[Clostridium] polysaccharolyticum	0.011477	2.10762	0.00459044	0.497076	0.523124	0.771238	0.625548	0.816187	0.816187		ALDEx2_t
2.50 mg/mL -6.60 mg/mL	p__Firmicutes|c__Clostridia|o__Clostridiales|f__Lachnospiraceae|g__|s__Lachnospiraceae bacterium Choco86	0.691062	3.91359	0.152331	0.417154	0.46859	0.730491	0.595066	0.810954	0.810954		ALDEx2_t
2.50 mg/mL - 6.60 mg/mL	p__Firmicutes|c__Clostridia|o__Clostridiales|f__Ruminococcaceae|g__Ruminococcus|s__Ruminococcus champanellensis	1.74393	4.87144	0.293107	0.368421	0.350841	0.638908	0.358463	0.634654	0.634654		ALDEx2_t
2.50 mg/mL -6.60 mg/mL	p__Firmicutes|c__Clostridia|o__Clostridiales|f__Lachnospiraceae|g__Anaerostipes|s__Anaerostipes hadrus	0.145675	2.64824	0.0367661	0.479532	0.666701	0.847681	0.722325	0.87681	0.87681		ALDEx2_t
2.50 mg/mL - 6.60 mg/mL	p__Firmicutes|c__Clostridia|o__Clostridiales|f__Peptostreptococcaceae|g__Clostridioides|s__Clostridioides difficile	4.13986	3.54286	1.06269	0.0937504	0.0132829	0.152762	0.00316647	0.0596176	0.0596176		ALDEx2_t
2.50 mg/mL -6.60 mg/mL	p__Firmicutes|c__Bacilli|o__Lactobacillales|f__Lactobacillaceae|g__Lactobacillus|s__Lactobacillus johnsonii	0.0157665	4.38449	0.00506985	0.494141	0.659677	0.844094	0.755355	0.897273	0.897273		ALDEx2_t
2.50 mg/mL - 6.60 mg/mL	p__Firmicutes|c__Clostridia|o__Clostridiales|f__Lachnospiraceae|g__Anaerotignum|s__Anaerotignum aminivorans	1.68977	2.99993	0.490246	0.245614	0.112236	0.404676	0.109493	0.342119	0.342119		ALDEx2_t
2.50 mg/mL -6.60 mg/mL	p__Firmicutes|c__Clostridia|o__Clostridiales|f__Lachnospiraceae|g__Mediterraneibacter|s__[Ruminococcus] gnavus	0.417824	2.19843	0.126931	0.415205	0.532385	0.778142	0.524114	0.754666	0.754666		ALDEx2_t
2.50 mg/mL - 6.60 mg/mL	p__Firmicutes|c__Clostridia|o__Clostridiales|f__Ruminococcaceae|g__Acetivibrio|s__Acetivibrio ethanolgignens	-0.951115	2.41483	-0.320304	0.318359	0.335949	0.607152	0.24595	0.519341	0.519341		ALDEx2_t
2.50 mg/mL -6.60 mg/mL	p__Firmicutes|c__Clostridia|o__Clostridiales|f__Hungateiclostridiaceae|g__Hungateiclostridium|s__Hungateiclostridium alkalicellulosi	-1.89209	3.11062	-0.502744	0.244141	0.137717	0.387355	0.0836448	0.311072	0.311072		ALDEx2_t
2.50 mg/mL - 6.60 mg/mL	p__Bacteroidetes|c__Bacteroidia|o__Bacteroidales|f__Rikenellaceae|g__Alistipes|s__Alistipes finegoldii	-1.04368	6.07836	-0.173097	0.417969	0.483443	0.715421	0.497314	0.720152	0.720152		ALDEx2_t
2.50 mg/mL -6.60 mg/mL	p__Firmicutes|c__Clostridia|o__Clostridiales|f__Lachnospiraceae|g__Lacrimispora|s__Lacrimispora amygdalina	-0.24344	2.40938	-0.0819138	0.451172	0.522151	0.755377	0.582273	0.787031	0.787031		ALDEx2_t
2.50 mg/mL - 6.60 mg/mL	p__Firmicutes|c__Clostridia|o__Clostridiales|f__Clostridiaceae|g__Clostridium|s__Clostridium botulinum	2.02896	4.03008	0.438576	0.274854	0.183092	0.485083	0.11476	0.37437	0.37437		ALDEx2_t
2.50 mg/mL -6.60 mg/mL	p__Firmicutes|c__Clostridia|o__Clostridiales|f__Hungateiclostridiaceae|g__Hungateiclostridium|s__Hungateiclostridium aldrichii	-2.28811	3.23307	-0.576203	0.214425	0.136351	0.374731	0.0636701	0.270189	0.270189		ALDEx2_t
2.50 mg/mL - 6.60 mg/mL	p__Firmicutes|c__Clostridia|o__Clostridiales|f__Lachnospiraceae|g__Roseburia|s__Roseburia intestinalis	0.0991184	2.43973	0.0299469	0.481481	0.610887	0.81808	0.659947	0.83952	0.83952		ALDEx2_t
2.50 mg/mL -6.60 mg/mL	p__Candidatus Melainabacteria|c__|o__Vampirovibrionales|f__|g__Vampirovibrio|s__Vampirovibrio chlorellavorus	-1.73349	5.72974	-0.251971	0.37037	0.334975	0.611499	0.387634	0.644474	0.644474		ALDEx2_t
2.50 mg/mL - 6.60 mg/mL	p__Firmicutes|c__Clostridia|o__Clostridiales|f__Hungateiclostridiaceae|g__Pseudoclostridium|s__Pseudoclostridium thermosuccinogenes	-1.13521	3.56041	-0.261557	0.339181	0.301966	0.560526	0.282993	0.55605	0.55605		ALDEx2_t
2.50 mg/mL -6.60 mg/mL	p__Firmicutes|c__Clostridia|o__Clostridiales|f__Ruminococcaceae|g__Acutalibacter|s__Acutalibacter muris	0.0746939	4.21265	0.0141796	0.487329	0.605244	0.813269	0.717664	0.877488	0.877488		ALDEx2_t
2.50 mg/mL - 6.60 mg/mL	p__Firmicutes|c__Clostridia|o__Clostridiales|f__Ruminococcaceae|g__Ruminococcus|s__Ruminococcus bicirculans	1.45627	4.4265	0.304745	0.345703	0.385537	0.653936	0.359955	0.620486	0.620486		ALDEx2_t
2.50 mg/mL -6.60 mg/mL	p__Firmicutes|c__Clostridia|o__Clostridiales|f__Lachnospiraceae|g__Lachnoclostridium|s__Lachnoclostridium pacaense	2.08758	3.07924	0.597964	0.208985	0.109517	0.373169	0.0595218	0.250039	0.250039		ALDEx2_t
2.50 mg/mL - 6.60 mg/mL	p__Firmicutes|c__Clostridia|o__Clostridiales|f__Lachnospiraceae|g__Blautia|s__Blautia sp. SC05B48	-0.493014	2.56212	-0.154501	0.400391	0.363095	0.640893	0.474405	0.711622	0.711622		ALDEx2_t
2.50 mg/mL -6.60 mg/mL	p__Firmicutes|c__Clostridia|o__Clostridiales|f__Lachnospiraceae|g__Lacrimispora|s__Lacrimispora celerecrescens	-1.32391	3.52743	-0.342366	0.289063	0.149805	0.420918	0.16482	0.440725	0.440725		ALDEx2_t
2.50 mg/mL - 6.60 mg/mL	p__Firmicutes|c__Clostridia|o__Clostridiales|f__Ruminococcaceae|g__Hydrogenoanaerobacterium|s__Hydrogenoanaerobacterium saccharovorans	0.03286	3.52119	0.00589896	0.498047	0.634217	0.831539	0.692483	0.867144	0.867144		ALDEx2_t
2.50 mg/mL -6.60 mg/mL	p__Firmicutes|c__Clostridia|o__Clostridiales|f__Ruminococcaceae|g__Negativibacillus|s__Negativibacillus massiliensis	-0.208844	3.29014	-0.0471891	0.467836	0.530402	0.763309	0.650962	0.836325	0.836325		ALDEx2_t
2.50 mg/mL - 6.60 mg/mL	p__Bacteroidetes|c__Bacteroidia|o__Bacteroidales|f__Rikenellaceae|g__Alistipes|s__Alistipes communis	-1.3753	5.99922	-0.217704	0.396484	0.469061	0.703999	0.511494	0.720995	0.720995		ALDEx2_t
2.50 mg/mL -6.60 mg/mL	p__Firmicutes|c__Clostridia|o__Clostridiales|f__Christensenellaceae|g__Christensenella|s__Christensenella timonensis	3.34071	3.40783	0.955648	0.128655	0.0333304	0.212864	0.0132598	0.100219	0.100219		ALDEx2_t
2.50 mg/mL - 6.60 mg/mL	p__Firmicutes|c__Clostridia|o__Clostridiales|f__|g__Colidextribacter|s__Colidextribacter massiliensis	0.270919	2.78766	0.0593067	0.464844	0.548028	0.783972	0.657429	0.838628	0.838628		ALDEx2_t
2.50 mg/mL -6.60 mg/mL	p__Firmicutes|c__Clostridia|o__Clostridiales|f__Clostridiaceae|g__Clostridium|s__Clostridium tarantellae	1.8534	4.65991	0.349715	0.34375	0.390306	0.673279	0.343915	0.622971	0.622971		ALDEx2_t
2.50 mg/mL - 6.60 mg/mL	p__Firmicutes|c__Bacilli|o__Lactobacillales|f__Lactobacillaceae|g__Lactobacillus|s__Lactobacillus animalis	-2.94401	5.04304	-0.544428	0.263672	0.173574	0.441631	0.154429	0.392028	0.392028		ALDEx2_t
2.50 mg/mL -6.60 mg/mL	p__Bacteroidetes|c__Bacteroidia|o__Bacteroidales|f__Rikenellaceae|g__Alistipes|s__Alistipes dispar	-2.22035	5.26793	-0.378305	0.345703	0.299146	0.573374	0.315422	0.572155	0.572155		ALDEx2_t
2.50 mg/mL - 6.60 mg/mL	p__Firmicutes|c__Clostridia|o__Clostridiales|f__Hungateiclostridiaceae|g__Hungateiclostridium|s__Hungateiclostridium saccincola	-2.19221	3.43196	-0.551902	0.236328	0.13518	0.368274	0.0714732	0.282527	0.282527		ALDEx2_t
2.50 mg/mL -6.60 mg/mL	p__Firmicutes|c__Clostridia|o__Clostridiales|f__Clostridiaceae|g__Falcatimonas|s__Falcatimonas natans	-0.149884	3.85616	-0.038648	0.473684	0.629455	0.823303	0.668342	0.848704	0.848704		ALDEx2_t
2.50 mg/mL - 6.60 mg/mL	p__Firmicutes|c__Clostridia|o__Clostridiales|f__Lachnospiraceae|g__Lachnospira|s__Lachnospira eligens	-1.97854	3.9763	-0.433237	0.275391	0.248151	0.514523	0.128273	0.389482	0.389482		ALDEx2_t
2.50 mg/mL -6.60 mg/mL	p__Firmicutes|c__Clostridia|o__Clostridiales|f__Lachnospiraceae|g__Bariatricus|s__Bariatricus massiliensis	2.23617	3.04925	0.592706	0.206628	0.0989396	0.354551	0.0466999	0.219205	0.219205		ALDEx2_t
2.50 mg/mL - 6.60 mg/mL	p__Firmicutes|c__Clostridia|o__Clostridiales|f__Lachnospiraceae|g__Parasporobacterium|s__Parasporobacterium paucivorans	-2.24631	3.62653	-0.524053	0.233918	0.189435	0.438276	0.0818387	0.298643	0.298643		ALDEx2_t
2.50 mg/mL -6.60 mg/mL	p__Firmicutes|c__Clostridia|o__Clostridiales|f__Eubacteriaceae|g__Eubacterium|s__Eubacterium oxidoreducens	0.553044	3.55442	0.13726	0.435547	0.57004	0.793367	0.577309	0.78865	0.78865		ALDEx2_t
2.50 mg/mL - 6.60 mg/mL	p__Firmicutes|c__Clostridia|o__Clostridiales|f__Ruminococcaceae|g__Harryflintia|s__Harryflintia acetispora	1.34046	3.46836	0.331245	0.31384	0.210935	0.506429	0.22117	0.475659	0.475659		ALDEx2_t
2.50 mg/mL -6.60 mg/mL	p__Firmicutes|c__Clostridia|o__Clostridiales|f__Lachnospiraceae|g__Anaerostipes|s__Anaerostipes butyraticus	0.631419	3.60111	0.137149	0.417154	0.576859	0.797915	0.560295	0.777895	0.777895		ALDEx2_t
2.50 mg/mL - 6.60 mg/mL	p__Firmicutes|c__Clostridia|o__Clostridiales|f__Lachnospiraceae|g__Lachnoclostridium|s__[Clostridium] populeti	-1.40206	3.47974	-0.353728	0.318359	0.253877	0.532317	0.256247	0.538002	0.538002		ALDEx2_t
2.50 mg/mL -6.60 mg/mL	p__Firmicutes|c__Clostridia|o__Clostridiales|f__Lachnospiraceae|g__Anaerocolumna|s__Anaerocolumna xylanovorans	0.744153	4.37394	0.135368	0.426901	0.542414	0.779203	0.582527	0.789572	0.789572		ALDEx2_t
2.50 mg/mL - 6.60 mg/mL	p__Firmicutes|c__Clostridia|o__Clostridiales|f__|g__|s__Clostridiales bacterium CCNA10	2.054	3.32252	0.555576	0.231969	0.142	0.416756	0.0795673	0.283488	0.283488		ALDEx2_t
2.50 mg/mL -6.60 mg/mL	p__Firmicutes|c__Clostridia|o__Clostridiales|f__Clostridiaceae|g__Butyricicoccus|s__Butyricicoccus pullicaecorum	3.04484	3.88589	0.757956	0.195313	0.0662319	0.296108	0.0326178	0.182084	0.182084		ALDEx2_t
2.50 mg/mL - 6.60 mg/mL	p__Firmicutes|c__Clostridia|o__Clostridiales|f__Ruminococcaceae|g__|s__[Clostridium] methylpentosum	-0.872292	3.47359	-0.23404	0.373047	0.405213	0.646179	0.387718	0.636103	0.636103		ALDEx2_t
2.50 mg/mL -6.60 mg/mL	p__Bacteroidetes|c__Bacteroidia|o__Bacteroidales|f__Rikenellaceae|g__Alistipes|s__Alistipes onderdonkii	-1.6233	5.16565	-0.315334	0.368421	0.367465	0.626162	0.421411	0.663417	0.663417		ALDEx2_t
2.50 mg/mL - 6.60 mg/mL	p__Firmicutes|c__Clostridia|o__Clostridiales|f__Lachnospiraceae|g__Anaerobutyricum|s__Anaerobutyricum hallii	0.783473	3.2646	0.178984	0.409357	0.495106	0.746687	0.509224	0.747121	0.747121		ALDEx2_t
2.50 mg/mL -6.60 mg/mL	p__Firmicutes|c__Clostridia|o__Clostridiales|f__Lachnospiraceae|g__Lacrimispora|s__Lacrimispora algidixylanolytica	0.156262	3.47007	0.0448314	0.466797	0.572457	0.78545	0.572238	0.785174	0.785174		ALDEx2_t
2.50 mg/mL - 6.60 mg/mL	p__Firmicutes|c__Clostridia|o__Clostridiales|f__Clostridiaceae|g__Clostridium|s__Clostridium saudiense	-0.761749	4.20091	-0.163957	0.410156	0.453141	0.702754	0.480435	0.727916	0.727916		ALDEx2_t
2.50 mg/mL -6.60 mg/mL	p__Firmicutes|c__Clostridia|o__Clostridiales|f__Hungateiclostridiaceae|g__Hungateiclostridium|s__Hungateiclostridium cellulolyticum	-1.12488	3.98076	-0.213693	0.388672	0.403372	0.650481	0.356177	0.61071	0.61071		ALDEx2_t
2.50 mg/mL - 6.60 mg/mL	p__Firmicutes|c__Clostridia|o__Clostridiales|f__Lachnospiraceae|g__Anaerostipes|s__Anaerostipes rhamnosivorans	-0.437972	3.86832	-0.0945113	0.453125	0.594872	0.801791	0.645711	0.831796	0.831796		ALDEx2_t
2.50 mg/mL -6.60 mg/mL	p__Firmicutes|c__Clostridia|o__Clostridiales|f__|g__Ihubacter|s__Ihubacter massiliensis	0.0804319	3.48226	0.0205363	0.483431	0.55866	0.785519	0.672007	0.847724	0.847724		ALDEx2_t
2.50 mg/mL - 6.60 mg/mL	p__Firmicutes|c__Clostridia|o__Clostridiales|f__Ruminococcaceae|g__Anaeromassilibacillus|s__Anaeromassilibacillus senegalensis	-0.762091	4.00717	-0.15398	0.435547	0.54673	0.766931	0.5589	0.769471	0.769471		ALDEx2_t
2.50 mg/mL -6.60 mg/mL	p__Bacteroidetes|c__Bacteroidia|o__Bacteroidales|f__Rikenellaceae|g__Alistipes|s__Alistipes putredinis	-1.26981	5.49788	-0.208467	0.385965	0.446844	0.69244	0.513657	0.734944	0.734944		ALDEx2_t
2.50 mg/mL - 6.60 mg/mL	p__Firmicutes|c__Clostridia|o__Clostridiales|f__Clostridiaceae|g__Clostridium|s__Clostridium disporicum	-1.59006	4.07977	-0.338234	0.319688	0.26969	0.533401	0.268219	0.54159	0.54159		ALDEx2_t
2.50 mg/mL -6.60 mg/mL	p__Firmicutes|c__Clostridia|o__Clostridiales|f__|g__Massilistercora|s__Massilistercora timonensis	1.1072	3.69738	0.255479	0.346979	0.430911	0.681834	0.354506	0.612677	0.612677		ALDEx2_t
2.50 mg/mL - 6.60 mg/mL	p__Firmicutes|c__Clostridia|o__Clostridiales|f__Lachnospiraceae|g__Faecalicatena|s__Faecalicatena contorta	-1.40514	3.84576	-0.329173	0.326172	0.337771	0.593157	0.231406	0.512269	0.512269		ALDEx2_t
2.50 mg/mL -6.60 mg/mL	p__Firmicutes|c__Clostridia|o__Clostridiales|f__Peptococcaceae|g__Dehalobacterium|s__Dehalobacterium formicoaceticum	1.4546	3.35883	0.385935	0.296875	0.23133	0.520055	0.198255	0.4483	0.4483		ALDEx2_t
2.50 mg/mL - 6.60 mg/mL	p__Firmicutes|c__Clostridia|o__Clostridiales|f__Lachnospiraceae|g__Roseburia|s__Roseburia hominis	0.747065	3.78829	0.151999	0.419922	0.493737	0.732628	0.474937	0.712458	0.712458		ALDEx2_t
2.50 mg/mL -6.60 mg/mL	p__Firmicutes|c__Clostridia|o__Clostridiales|f__Lachnospiraceae|g__Schaedlerella|s__Schaedlerella arabinosiphila	-2.62557	3.46987	-0.680217	0.207031	0.0462598	0.233495	0.0434949	0.224384	0.224384		ALDEx2_t
2.50 mg/mL - 6.60 mg/mL	p__Firmicutes|c__Clostridia|o__Clostridiales|f__Ruminococcaceae|g__|s__[Clostridium] viride	-0.075659	3.40844	-0.011921	0.489279	0.519031	0.757658	0.598986	0.802997	0.802997		ALDEx2_t
2.50 mg/mL -6.60 mg/mL	p__Firmicutes|c__Clostridia|o__Clostridiales|f__Hungateiclostridiaceae|g__|s__Hungateiclostridiaceae bacterium KB18	0.0225957	4.50091	0.00431371	0.498047	0.538436	0.771646	0.601879	0.801568	0.801568		ALDEx2_t
2.50 mg/mL - 6.60 mg/mL	p__Firmicutes|c__Clostridia|o__Clostridiales|f__Hungateiclostridiaceae|g__Anaerobacterium|s__Anaerobacterium chartisolvens	-0.999438	3.43142	-0.239713	0.369141	0.402217	0.64848	0.425382	0.674571	0.674571		ALDEx2_t
2.50 mg/mL -6.60 mg/mL	p__Firmicutes|c__Clostridia|o__Clostridiales|f__Clostridiaceae|g__Clostridium|s__Clostridium sp. JN-9	2.26593	3.87764	0.514449	0.237817	0.157896	0.432309	0.105718	0.329232	0.329232		ALDEx2_t
2.50 mg/mL - 6.60 mg/mL	p__Firmicutes|c__Clostridia|o__Clostridiales|f__Lachnospiraceae|g__Marvinbryantia|s__Marvinbryantia formatexigens	-0.748757	3.79967	-0.182556	0.395712	0.450158	0.698297	0.466163	0.708504	0.708504		ALDEx2_t
2.50 mg/mL -6.60 mg/mL	p__Firmicutes|c__Clostridia|o__Clostridiales|f__Peptococcaceae|g__|s__Peptococcaceae bacterium DCMF	1.66566	4.07107	0.351142	0.307992	0.313081	0.580043	0.240903	0.495769	0.495769		ALDEx2_t
2.50 mg/mL - 6.60 mg/mL	p__Firmicutes|c__Clostridia|o__Clostridiales|f__Lachnospiraceae|g__Lachnoclostridium|s__[Clostridium] scindens	-1.48299	3.9624	-0.319678	0.321637	0.297075	0.562039	0.298642	0.543366	0.543366		ALDEx2_t
2.50 mg/mL -6.60 mg/mL	p__Bacteroidetes|c__Bacteroidia|o__Bacteroidales|f__Rikenellaceae|g__Alistipes|s__Alistipes megaguti	-1.10355	5.06974	-0.193565	0.412109	0.433691	0.678111	0.480799	0.699609	0.699609		ALDEx2_t
2.50 mg/mL - 6.60 mg/mL	p__Firmicutes|c__Clostridia|o__Clostridiales|f__Clostridiaceae|g__Clostridium|s__Clostridium subterminale	1.22745	4.615	0.23499	0.378168	0.425767	0.680957	0.435741	0.667629	0.667629		ALDEx2_t
2.50 mg/mL -6.60 mg/mL	p__Firmicutes|c__Clostridia|o__Clostridiales|f__Lachnospiraceae|g__Blautia|s__Blautia sp. N6H1-15	0.435974	4.42374	0.0919489	0.458984	0.551113	0.777327	0.584606	0.787639	0.787639		ALDEx2_t
2.50 mg/mL - 6.60 mg/mL	p__Firmicutes|c__Clostridia|o__Clostridiales|f__Hungateiclostridiaceae|g__Ruminiclostridium|s__Ruminiclostridium cellulolyticum	-0.746514	4.10349	-0.162799	0.396484	0.507118	0.731598	0.519416	0.73725	0.73725		ALDEx2_t
2.50 mg/mL -6.60 mg/mL	p__Firmicutes|c__Clostridia|o__Clostridiales|f__Ruminococcaceae|g__Papillibacter|s__Papillibacter cinnamivorans	1.30555	3.47937	0.331147	0.331384	0.3449	0.612518	0.296585	0.532516	0.532516		ALDEx2_t
2.50 mg/mL - 6.60 mg/mL	p__Firmicutes|c__Erysipelotrichia|o__Erysipelotrichales|f__Erysipelotrichaceae|g__Breznakia|s__Breznakia pachnodae	-1.75874	3.84141	-0.375876	0.310547	0.267678	0.530506	0.236775	0.494532	0.494532		ALDEx2_t
2.50 mg/mL -6.60 mg/mL	p__Firmicutes|c__Clostridia|o__Clostridiales|f__Clostridiaceae|g__Clostridium|s__Clostridium beijerinckii	1.56297	4.23734	0.335598	0.34375	0.34668	0.623975	0.346379	0.596444	0.596444		ALDEx2_t
2.50 mg/mL - 6.60 mg/mL	p__Firmicutes|c__Clostridia|o__Clostridiales|f__Ruminococcaceae|g__Tepidibaculum|s__Tepidibaculum saccharolyticum	0.756836	4.24936	0.146867	0.431641	0.525476	0.745555	0.566234	0.7648	0.7648		ALDEx2_t
2.50 mg/mL -6.60 mg/mL	p__Firmicutes|c__Clostridia|o__Clostridiales|f__Ruminococcaceae|g__Caproiciproducens|s__Caproiciproducens galactitolivorans	1.27238	4.37514	0.227527	0.374269	0.494701	0.732937	0.486323	0.713409	0.713409		ALDEx2_t
2.50 mg/mL - 6.60 mg/mL	p__Firmicutes|c__Clostridia|o__Clostridiales|f__Hungateiclostridiaceae|g__Ruminiclostridium|s__Ruminiclostridium cellobioparum	-1.5211	4.17551	-0.317442	0.345703	0.34256	0.581556	0.289688	0.531398	0.531398		ALDEx2_t
2.50 mg/mL -6.60 mg/mL	p__Firmicutes|c__Clostridia|o__Clostridiales|f__Clostridiaceae|g__Clostridium|s__Clostridium ventriculi	1.96791	3.84235	0.458363	0.25731	0.223178	0.484418	0.175367	0.395057	0.395057		ALDEx2_t
2.50 mg/mL - 6.60 mg/mL	p__Firmicutes|c__Clostridia|o__Clostridiales|f__|g__Monoglobus|s__Monoglobus pectinilyticus	0.194402	4.34829	0.0340201	0.475634	0.525647	0.75535	0.546316	0.759159	0.759159		ALDEx2_t
2.50 mg/mL -6.60 mg/mL	p__Firmicutes|c__Erysipelotrichia|o__Erysipelotrichales|f__Erysipelotrichaceae|g__Turicibacter|s__Turicibacter sp. H121	0.65202	4.32606	0.125934	0.430799	0.488821	0.733762	0.512571	0.734001	0.734001		ALDEx2_t
2.50 mg/mL - 6.60 mg/mL	p__Firmicutes|c__Clostridia|o__Clostridiales|f__Clostridiaceae|g__Hungatella|s__Hungatella xylanolytica	0.760394	3.82842	0.171641	0.413255	0.486039	0.729416	0.451686	0.687392	0.687392		ALDEx2_t
2.50 mg/mL -6.60 mg/mL	p__Firmicutes|c__Bacilli|o__Lactobacillales|f__Lactobacillaceae|g__Lactobacillus|s__Lactobacillus rogosae	-1.13363	4.259	-0.23587	0.382813	0.454328	0.690478	0.442325	0.665659	0.665659		ALDEx2_t
2.50 mg/mL - 6.60 mg/mL	p__Firmicutes|c__Clostridia|o__Clostridiales|f__Hungateiclostridiaceae|g__Hungateiclostridium|s__Hungateiclostridium thermocellum	-0.736914	4.16336	-0.148756	0.415205	0.43599	0.679045	0.461459	0.693241	0.693241		ALDEx2_t
2.50 mg/mL -6.60 mg/mL	p__Firmicutes|c__Clostridia|o__Clostridiales|f__Lachnospiraceae|g__Faecalicatena|s__Faecalicatena fissicatena	-0.973924	3.62476	-0.210621	0.385965	0.440307	0.682272	0.466361	0.695019	0.695019		ALDEx2_t
2.50 mg/mL - 6.60 mg/mL	p__Firmicutes|c__Clostridia|o__Clostridiales|f__Ruminococcaceae|g__Faecalibacterium|s__Faecalibacterium prausnitzii	0.564826	3.97755	0.108175	0.435547	0.456872	0.710682	0.470603	0.699643	0.699643		ALDEx2_t
2.50 mg/mL -6.60 mg/mL	p__Firmicutes|c__Clostridia|o__Clostridiales|f__Clostridiaceae|g__Clostridium|s__Clostridium merdae	-0.665414	4.62965	-0.13099	0.444444	0.486561	0.712426	0.515168	0.720267	0.720267		ALDEx2_t
2.50 mg/mL - 6.60 mg/mL	p__Tenericutes|c__Mollicutes|o__Entomoplasmatales|f__Spiroplasmataceae|g__Spiroplasma|s__Spiroplasma chrysopicola	-0.756785	4.32339	-0.142172	0.442495	0.485618	0.711284	0.500908	0.715753	0.715753		ALDEx2_t
2.50 mg/mL -6.60 mg/mL	p__Firmicutes|c__Clostridia|o__Clostridiales|f__Hungateiclostridiaceae|g__Hungateiclostridium|s__Hungateiclostridium straminisolvens	-0.646841	4.14414	-0.143844	0.421875	0.465416	0.697205	0.485785	0.711779	0.711779		ALDEx2_t
2.50 mg/mL - 6.60 mg/mL	p__Firmicutes|c__Clostridia|o__Clostridiales|f__Lachnospiraceae|g__|s__Lachnospiraceae bacterium oral taxon 500	-0.118347	4.24917	-0.0259288	0.489279	0.51495	0.744467	0.555987	0.763197	0.763197		ALDEx2_t
2.50 mg/mL -6.60 mg/mL	p__Firmicutes|c__Clostridia|o__Clostridiales|f__Peptostreptococcaceae|g__Romboutsia|s__Romboutsia timonensis	-1.36822	4.274	-0.269539	0.37232	0.395468	0.634055	0.382881	0.617541	0.617541		ALDEx2_t
2.50 mg/mL - 6.60 mg/mL	p__Firmicutes|c__Erysipelotrichia|o__Erysipelotrichales|f__Erysipelotrichaceae|g__Faecalitalea|s__Faecalitalea cylindroides	-1.06941	4.28528	-0.197728	0.408203	0.418349	0.667868	0.453593	0.687309	0.687309		ALDEx2_t
2.50 mg/mL -6.60 mg/mL	p__Tenericutes|c__Mollicutes|o__Entomoplasmatales|f__Spiroplasmataceae|g__Spiroplasma|s__Spiroplasma lampyridicola	-0.993293	4.52256	-0.190597	0.408203	0.455213	0.693812	0.461391	0.692023	0.692023		ALDEx2_t
2.50 mg/mL - 6.60 mg/mL	p__Firmicutes|c__Clostridia|o__Clostridiales|f__Hungateiclostridiaceae|g__Hungateiclostridium|s__Hungateiclostridium clariflavum	-0.735917	4.02817	-0.153435	0.423828	0.476772	0.707486	0.536524	0.748307	0.748307		ALDEx2_t
2.50 mg/mL -6.60 mg/mL	p__Tenericutes|c__Mollicutes|o__Entomoplasmatales|f__Spiroplasmataceae|g__Spiroplasma|s__Spiroplasma syrphidicola	-0.686427	4.12948	-0.142691	0.438597	0.447429	0.693988	0.494296	0.711945	0.711945		ALDEx2_t
0.40 mg/mL - 0 mg/mL	p__Firmicutes|c__Clostridia|o__Clostridiales|f__Lachnospiraceae|g__|s__Lachnospiraceae bacterium GAM79	-0.212557	4.33872	-0.063257	0.464935	0.461117	0.793772	0.905292	0.973882	0.973882		ALDEx2_t
0.40 mg/mL - 0 mg/mL	p__Firmicutes|c__Clostridia|o__Clostridiales|f__Lachnospiraceae|g__Lacrimispora|s__Lacrimispora saccharolytica	-0.0124997	2.93209	-0.00358566	0.497396	0.686148	0.875662	0.835371	0.960643	0.960643		ALDEx2_t
0.40 mg/mL - 0 mg/mL	p__Firmicutes|c__Clostridia|o__Clostridiales|f__Eubacteriaceae|g__Eubacterium|s__Eubacterium ventriosum	1.79125	2.55234	0.602	0.288312	0.170779	0.688141	0.1591	0.671456	0.671456		ALDEx2_t
0.40 mg/mL - 0 mg/mL	p__Firmicutes|c__Clostridia|o__Clostridiales|f__Clostridiaceae|g__Clostridium|s__Clostridium sp. BNL1100	1.50923	3.33196	0.453886	0.301299	0.178203	0.688322	0.212854	0.703912	0.703912		ALDEx2_t
0.40 mg/mL - 0 mg/mL	p__Firmicutes|c__Clostridia|o__Clostridiales|f__Lachnospiraceae|g__Eisenbergiella|s__Eisenbergiella massiliensis	0.052505	3.62479	0.0178476	0.485714	0.505519	0.8102	0.83619	0.956616	0.956616		ALDEx2_t
0.40 mg/mL - 0 mg/mL	p__Firmicutes|c__Clostridia|o__Clostridiales|f__Eubacteriaceae|g__Eubacterium|s__Eubacterium coprostanoligenes	1.80805	4.00855	0.422145	0.348052	0.291568	0.734225	0.354021	0.789784	0.789784		ALDEx2_t
0.40 mg/mL - 0 mg/mL	p__Firmicutes|c__Clostridia|o__Clostridiales|f__Oscillospiraceae|g__Dysosmobacter|s__Dysosmobacter welbionis	-2.38397	2.94847	-0.681246	0.216146	0.0938141	0.645206	0.0650074	0.57202	0.57202		ALDEx2_t
0.40 mg/mL - 0 mg/mL	p__Firmicutes|c__Clostridia|o__Clostridiales|f__Lachnospiraceae|g__Lacrimispora|s__Lacrimispora sphenoides	-0.212591	2.9236	-0.05665	0.454545	0.661188	0.870612	0.796928	0.943659	0.943659		ALDEx2_t
0.40 mg/mL - 0 mg/mL	p__Firmicutes|c__Clostridia|o__Clostridiales|f__Clostridiaceae|g__Hungatella|s__Hungatella hathewayi	-0.240051	2.01877	-0.090351	0.451948	0.519312	0.814585	0.719939	0.91271	0.91271		ALDEx2_t
0.40 mg/mL - 0 mg/mL	p__Firmicutes|c__Clostridia|o__Clostridiales|f__Lachnospiraceae|g__Kineothrix|s__Kineothrix alysoides	-0.533744	4.19651	-0.115054	0.40625	0.316348	0.744166	0.613782	0.88132	0.88132		ALDEx2_t
0.40 mg/mL - 0 mg/mL	p__Bacteroidetes|c__Bacteroidia|o__Bacteroidales|f__Muribaculaceae|g__Muribaculum|s__Muribaculum intestinale	-2.4321	5.55274	-0.398196	0.34026	0.372207	0.759047	0.381563	0.784767	0.784767		ALDEx2_t
0.40 mg/mL - 0 mg/mL	p__Firmicutes|c__Clostridia|o__Clostridiales|f__Hungateiclostridiaceae|g__Hungateiclostridium|s__Hungateiclostridium alkalicellulosi	2.17505	3.51295	0.585958	0.238961	0.0794193	0.629713	0.0983216	0.609144	0.609144		ALDEx2_t
0.40 mg/mL - 0 mg/mL	p__Firmicutes|c__Clostridia|o__Clostridiales|f__Lachnospiraceae|g__Anaerotaenia|s__Anaerotaenia torta	-0.29607	2.79194	-0.0971934	0.450521	0.523395	0.818978	0.704977	0.91601	0.91601		ALDEx2_t
0.40 mg/mL - 0 mg/mL	p__Firmicutes|c__Clostridia|o__Clostridiales|f__|g__Flintibacter|s__Flintibacter sp. KGMB00164	-0.6515	2.0983	-0.24211	0.364583	0.629905	0.860414	0.452607	0.822341	0.822341		ALDEx2_t
0.40 mg/mL - 0 mg/mL	p__Firmicutes|c__Clostridia|o__Clostridiales|f__Christensenellaceae|g__Christensenella|s__Christensenella minuta	1.72427	1.93773	0.853907	0.176624	0.0167707	0.454081	0.0347295	0.509758	0.509758		ALDEx2_t
0.40 mg/mL - 0 mg/mL	p__Firmicutes|c__Clostridia|o__Clostridiales|f__Eubacteriaceae|g__Eubacterium|s__Eubacterium xylanophilum	1.9827	2.01789	0.846859	0.174479	0.0213636	0.461045	0.0280987	0.485203	0.485203		ALDEx2_t
0.40 mg/mL - 0 mg/mL	p__Firmicutes|c__Clostridia|o__Clostridiales|f__Lachnospiraceae|g__Lachnoclostridium|s__Lachnoclostridium phytofermentans	-1.10256	2.77758	-0.359953	0.328125	0.257684	0.721202	0.291629	0.739171	0.739171		ALDEx2_t
0.40 mg/mL - 0 mg/mL	p__Firmicutes|c__Bacilli|o__Lactobacillales|f__Lactobacillaceae|g__Lactobacillus|s__Lactobacillus johnsonii	1.52874	2.79919	0.413083	0.320313	0.582247	0.838483	0.286102	0.750009	0.750009		ALDEx2_t
0.40 mg/mL - 0 mg/mL	p__Firmicutes|c__Clostridia|o__Clostridiales|f__Lachnospiraceae|g__Lachnospira|s__Lachnospira eligens	1.85625	2.36824	0.709836	0.246753	0.10905	0.628146	0.107402	0.614521	0.614521		ALDEx2_t
0.40 mg/mL - 0 mg/mL	p__Firmicutes|c__Clostridia|o__Clostridiales|f__Oscillospiraceae|g__Oscillibacter|s__Oscillibacter valericigenes	-2.29759	3.76556	-0.477741	0.252604	0.216836	0.698361	0.153073	0.668405	0.668405		ALDEx2_t
0.40 mg/mL - 0 mg/mL	p__Firmicutes|c__Clostridia|o__Clostridiales|f__Ruminococcaceae|g__|s__[Eubacterium] siraeum	-0.653164	3.64862	-0.166915	0.436364	0.465309	0.798027	0.69287	0.916761	0.916761		ALDEx2_t
0.40 mg/mL - 0 mg/mL	p__Firmicutes|c__Clostridia|o__Clostridiales|f__Lachnospiraceae|g__Lachnoclostridium|s__Lachnoclostridium sp. YL32	-0.863267	2.38115	-0.25776	0.358442	0.289377	0.73374	0.426765	0.807279	0.807279		ALDEx2_t
0.40 mg/mL - 0 mg/mL	p__Firmicutes|c__Clostridia|o__Clostridiales|f__Lachnospiraceae|g__Faecalimonas|s__Faecalimonas umbilicata	-1.42264	3.38946	-0.427767	0.322078	0.182951	0.690126	0.244992	0.718097	0.718097		ALDEx2_t
0.40 mg/mL - 0 mg/mL	p__Firmicutes|c__Clostridia|o__Clostridiales|f__Hungateiclostridiaceae|g__Pseudoclostridium|s__Pseudoclostridium thermosuccinogenes	1.73383	3.80747	0.388082	0.34026	0.402227	0.773888	0.337622	0.763072	0.763072		ALDEx2_t
0.40 mg/mL - 0 mg/mL	p__Firmicutes|c__Clostridia|o__Clostridiales|f__Lachnospiraceae|g__Acetatifactor|s__Acetatifactor muris	-0.970268	4.10044	-0.232943	0.366234	0.476191	0.800606	0.450144	0.825008	0.825008		ALDEx2_t
0.40 mg/mL - 0 mg/mL	p__Firmicutes|c__Clostridia|o__Clostridiales|f__Hungateiclostridiaceae|g__Hungateiclostridium|s__Hungateiclostridium aldrichii	1.10076	4.24421	0.215923	0.41039	0.604876	0.848068	0.598837	0.879075	0.879075		ALDEx2_t
0.40 mg/mL - 0 mg/mL	p__Firmicutes|c__Clostridia|o__Clostridiales|f__Hungateiclostridiaceae|g__Hungateiclostridium|s__Hungateiclostridium saccincola	2.44584	4.17443	0.453999	0.309091	0.296965	0.720386	0.234668	0.713634	0.713634		ALDEx2_t
0.40 mg/mL - 0 mg/mL	p__Firmicutes|c__Clostridia|o__Clostridiales|f__Lachnospiraceae|g__Herbinix|s__Herbinix luporum	-1.16639	2.65381	-0.373966	0.335938	0.326906	0.74284	0.338596	0.764782	0.764782		ALDEx2_t
0.40 mg/mL - 0 mg/mL	p__Firmicutes|c__Clostridia|o__Clostridiales|f__Ruminococcaceae|g__Ruminococcus|s__Ruminococcus champanellensis	-2.86477	4.81833	-0.519436	0.289063	0.219466	0.678005	0.254276	0.704244	0.704244		ALDEx2_t
0.40 mg/mL - 0 mg/mL	p__Firmicutes|c__Clostridia|o__Clostridiales|f__Ruminococcaceae|g__Phocea|s__Phocea massiliensis	-0.452598	3.4018	-0.0978559	0.45974	0.424778	0.78034	0.74924	0.929108	0.929108		ALDEx2_t
0.40 mg/mL - 0 mg/mL	p__Firmicutes|c__Clostridia|o__Clostridiales|f__Lachnospiraceae|g__Enterocloster|s__Enterocloster bolteae	-0.347578	2.33959	-0.1238	0.408854	0.629453	0.853924	0.60973	0.878031	0.878031		ALDEx2_t
0.40 mg/mL - 0 mg/mL	p__Firmicutes|c__Clostridia|o__Clostridiales|f__Ruminococcaceae|g__Flavonifractor|s__Flavonifractor plautii	-0.510469	3.95628	-0.111865	0.433766	0.611199	0.848844	0.681946	0.906727	0.906727		ALDEx2_t
0.40 mg/mL - 0 mg/mL	p__Firmicutes|c__Clostridia|o__Clostridiales|f__Lachnospiraceae|g__Blautia|s__Blautia sp. YL58	-0.731934	3.38594	-0.18152	0.398438	0.406317	0.774828	0.543664	0.857673	0.857673		ALDEx2_t
0.40 mg/mL - 0 mg/mL	p__Firmicutes|c__Clostridia|o__Clostridiales|f__Lachnospiraceae|g__Blautia|s__Blautia producta	-0.214266	3.55314	-0.0535447	0.473958	0.580791	0.835067	0.801722	0.947508	0.947508		ALDEx2_t
0.40 mg/mL - 0 mg/mL	p__Firmicutes|c__Clostridia|o__Clostridiales|f__Ruminococcaceae|g__Anaerotruncus|s__Anaerotruncus rubiinfantis	-0.360099	3.21106	-0.0858369	0.433766	0.635456	0.858129	0.63953	0.890141	0.890141		ALDEx2_t
0.40 mg/mL - 0 mg/mL	p__Firmicutes|c__Clostridia|o__Clostridiales|f__Christensenellaceae|g__Christensenella|s__Christensenella massiliensis	-0.0907468	2.88154	-0.0228451	0.490909	0.629839	0.856444	0.748884	0.93095	0.93095		ALDEx2_t
0.40 mg/mL - 0 mg/mL	p__Firmicutes|c__Clostridia|o__Clostridiales|f__Lachnospiraceae|g__Anaerocolumna|s__Anaerocolumna cellulosilytica	-0.47736	2.87972	-0.11922	0.423377	0.546402	0.821812	0.590701	0.871715	0.871715		ALDEx2_t
0.40 mg/mL - 0 mg/mL	p__Firmicutes|c__Clostridia|o__Clostridiales|f__Lachnospiraceae|g__Eisenbergiella|s__Eisenbergiella tayi	-0.233685	3.12518	-0.0688138	0.458333	0.497302	0.810048	0.702987	0.91057	0.91057		ALDEx2_t
0.40 mg/mL - 0 mg/mL	p__Firmicutes|c__Clostridia|o__Clostridiales|f__Hungateiclostridiaceae|g__Hungateiclostridium|s__Hungateiclostridium cellulolyticum	2.71094	5.20155	0.461021	0.28125	0.293405	0.719087	0.202375	0.689581	0.689581		ALDEx2_t
0.40 mg/mL - 0 mg/mL	p__Firmicutes|c__Clostridia|o__Clostridiales|f__Lachnospiraceae|g__Butyrivibrio|s__Butyrivibrio crossotus	-0.391019	2.57754	-0.141412	0.440104	0.51227	0.816971	0.626687	0.888279	0.888279		ALDEx2_t
0.40 mg/mL - 0 mg/mL	p__Firmicutes|c__Erysipelotrichia|o__Erysipelotrichales|f__Erysipelotrichaceae|g__Breznakia|s__Breznakia pachnodae	3.96774	4.74749	0.767108	0.1875	0.107914	0.560634	0.0746303	0.543962	0.543962		ALDEx2_t
0.40 mg/mL - 0 mg/mL	p__Firmicutes|c__Bacilli|o__Lactobacillales|f__Lactobacillaceae|g__Lactobacillus|s__Lactobacillus rogosae	2.54159	4.25388	0.541523	0.283854	0.189993	0.647939	0.148595	0.656506	0.656506		ALDEx2_t
0.40 mg/mL - 0 mg/mL	p__Firmicutes|c__Clostridia|o__Clostridiales|f__Lachnospiraceae|g__Lacrimispora|s__Lacrimispora indolis	-0.46969	2.80774	-0.156857	0.423377	0.557655	0.82827	0.566687	0.866855	0.866855		ALDEx2_t
0.40 mg/mL - 0 mg/mL	p__Firmicutes|c__Clostridia|o__Clostridiales|f__Lachnospiraceae|g__Robinsoniella|s__Robinsoniella peoriensis	-1.39647	2.77419	-0.396769	0.304688	0.255914	0.716285	0.309726	0.740952	0.740952		ALDEx2_t
0.40 mg/mL - 0 mg/mL	p__Firmicutes|c__Clostridia|o__Clostridiales|f__Hungateiclostridiaceae|g__Anaerobacterium|s__Anaerobacterium chartisolvens	1.3402	4.03388	0.283547	0.361039	0.47676	0.797746	0.40626	0.800824	0.800824		ALDEx2_t
0.40 mg/mL - 0 mg/mL	p__Bacteroidetes|c__Bacteroidia|o__Bacteroidales|f__Muribaculaceae|g__Duncaniella|s__Duncaniella sp. B8	-2.03598	4.95707	-0.400465	0.324675	0.33664	0.728378	0.376627	0.759758	0.759758		ALDEx2_t
0.40 mg/mL - 0 mg/mL	p__Firmicutes|c__Clostridia|o__Clostridiales|f__Lachnospiraceae|g__Faecalicatena|s__Faecalicatena orotica	-0.759017	2.83885	-0.22181	0.4	0.394492	0.764891	0.49396	0.83301	0.83301		ALDEx2_t
0.40 mg/mL - 0 mg/mL	p__Firmicutes|c__Clostridia|o__Clostridiales|f__Ruminococcaceae|g__Acetivibrio|s__Acetivibrio ethanolgignens	0.282921	1.77852	0.0938568	0.438961	0.543707	0.822585	0.580911	0.866291	0.866291		ALDEx2_t
0.40 mg/mL - 0 mg/mL	p__Firmicutes|c__Clostridia|o__Clostridiales|f__Clostridiaceae|g__Geosporobacter|s__Geosporobacter ferrireducens	0.169619	2.94697	0.0537244	0.47013	0.655009	0.865006	0.716551	0.916809	0.916809		ALDEx2_t
0.40 mg/mL - 0 mg/mL	p__Firmicutes|c__Clostridia|o__Clostridiales|f__Lachnospiraceae|g__Mediterraneibacter|s__[Ruminococcus] gnavus	-0.22569	3.06224	-0.055721	0.466146	0.566109	0.833149	0.700164	0.909229	0.909229		ALDEx2_t
0.40 mg/mL - 0 mg/mL	p__Firmicutes|c__Clostridia|o__Clostridiales|f__Clostridiaceae|g__Clostridium|s__Clostridium botulinum	1.4377	3.76521	0.346158	0.319481	0.434188	0.766769	0.319167	0.750482	0.750482		ALDEx2_t
0.40 mg/mL - 0 mg/mL	p__Firmicutes|c__Clostridia|o__Clostridiales|f__Lachnospiraceae|g__Lachnoclostridium|s__[Clostridium] populeti	1.84622	2.52879	0.622109	0.229167	0.168201	0.612472	0.11311	0.604208	0.604208		ALDEx2_t
0.40 mg/mL - 0 mg/mL	p__Firmicutes|c__Clostridia|o__Clostridiales|f__Oscillospiraceae|g__Oscillibacter|s__Oscillibacter sp. PEA192	-1.2683	3.13685	-0.349204	0.327273	0.352001	0.747388	0.327751	0.751722	0.751722		ALDEx2_t
0.40 mg/mL - 0 mg/mL	p__Firmicutes|c__Clostridia|o__Clostridiales|f__Lachnospiraceae|g__Lachnoclostridium|s__[Clostridium] polysaccharolyticum	-0.118055	3.24945	-0.0393781	0.479167	0.606279	0.847767	0.702625	0.91549	0.91549		ALDEx2_t
0.40 mg/mL - 0 mg/mL	p__Firmicutes|c__Clostridia|o__Clostridiales|f__Lachnospiraceae|g__Roseburia|s__Roseburia intestinalis	-1.33949	3.59607	-0.297945	0.355844	0.383569	0.765166	0.397627	0.790057	0.790057		ALDEx2_t
0.40 mg/mL - 0 mg/mL	p__Firmicutes|c__Clostridia|o__Clostridiales|f__Lachnospiraceae|g__|s__Lachnospiraceae bacterium Choco86	-1.26478	2.49752	-0.478359	0.288312	0.21859	0.688006	0.227802	0.679596	0.679596		ALDEx2_t
0.40 mg/mL - 0 mg/mL	p__Firmicutes|c__Clostridia|o__Clostridiales|f__Clostridiaceae|g__Clostridium|s__Clostridium tarantellae	0.556758	3.02071	0.145727	0.432292	0.581437	0.834916	0.602001	0.873674	0.873674		ALDEx2_t
0.40 mg/mL - 0 mg/mL	p__Firmicutes|c__Clostridia|o__Clostridiales|f__Lachnospiraceae|g__Blautia|s__Blautia sp. SC05B48	0.277063	3.38565	0.0585335	0.451948	0.649253	0.864115	0.721767	0.920417	0.920417		ALDEx2_t
0.40 mg/mL - 0 mg/mL	p__Firmicutes|c__Clostridia|o__Clostridiales|f__Catabacteriaceae|g__Catabacter|s__Catabacter hongkongensis	0.657011	3.72107	0.182475	0.425974	0.520371	0.814061	0.607638	0.878127	0.878127		ALDEx2_t
0.40 mg/mL - 0 mg/mL	p__Firmicutes|c__Clostridia|o__Clostridiales|f__Peptostreptococcaceae|g__Romboutsia|s__Romboutsia ilealis	3.65731	5.25662	0.644495	0.244156	0.177797	0.636115	0.173411	0.634263	0.634263		ALDEx2_t
0.40 mg/mL - 0 mg/mL	p__Firmicutes|c__Clostridia|o__Clostridiales|f__Lachnospiraceae|g__Lacrimispora|s__Lacrimispora celerecrescens	1.38012	3.53852	0.286765	0.338542	0.391369	0.757087	0.335766	0.752318	0.752318		ALDEx2_t
0.40 mg/mL - 0 mg/mL	p__Firmicutes|c__Clostridia|o__Clostridiales|f__Lachnospiraceae|g__Lacrimispora|s__Lacrimispora algidixylanolytica	1.124	3.53403	0.26886	0.361979	0.412382	0.766687	0.437237	0.797878	0.797878		ALDEx2_t
0.40 mg/mL - 0 mg/mL	p__Firmicutes|c__Clostridia|o__Clostridiales|f__Hungateiclostridiaceae|g__Ruminiclostridium|s__Ruminiclostridium cellobioparum	2.69039	4.39112	0.556248	0.251948	0.262089	0.688334	0.140009	0.627761	0.627761		ALDEx2_t
0.40 mg/mL - 0 mg/mL	p__Firmicutes|c__Clostridia|o__Clostridiales|f__Lachnospiraceae|g__Anaerostipes|s__Anaerostipes hadrus	0.410536	3.54874	0.084672	0.45974	0.580058	0.845923	0.638957	0.884014	0.884014		ALDEx2_t
0.40 mg/mL - 0 mg/mL	p__Firmicutes|c__Clostridia|o__Clostridiales|f__Lachnospiraceae|g__Lacrimispora|s__Lacrimispora amygdalina	0.775042	3.64028	0.161399	0.390625	0.596752	0.843023	0.57288	0.857526	0.857526		ALDEx2_t
0.40 mg/mL - 0 mg/mL	p__Firmicutes|c__Clostridia|o__Clostridiales|f__Ruminococcaceae|g__Ruminococcus|s__Ruminococcus bicirculans	-2.50964	3.84624	-0.576195	0.225974	0.200958	0.667508	0.139135	0.609274	0.609274		ALDEx2_t
0.40 mg/mL - 0 mg/mL	p__Firmicutes|c__Clostridia|o__Clostridiales|f__Christensenellaceae|g__Christensenella|s__Christensenella timonensis	1.85947	3.81213	0.445168	0.264935	0.230573	0.662423	0.203215	0.661372	0.661372		ALDEx2_t
0.40 mg/mL - 0 mg/mL	p__Firmicutes|c__Clostridia|o__Clostridiales|f__Hungateiclostridiaceae|g__Ruminiclostridium|s__Ruminiclostridium cellulolyticum	1.62489	3.75678	0.394284	0.327273	0.341049	0.731774	0.337792	0.745852	0.745852		ALDEx2_t
0.40 mg/mL - 0 mg/mL	p__Firmicutes|c__Clostridia|o__Clostridiales|f__Lachnospiraceae|g__|s__Lachnospiraceae bacterium oral taxon 500	1.52792	3.05351	0.459116	0.275325	0.346896	0.719283	0.233607	0.679471	0.679471		ALDEx2_t
0.40 mg/mL - 0 mg/mL	p__Firmicutes|c__Clostridia|o__Clostridiales|f__Ruminococcaceae|g__Pseudoflavonifractor|s__Pseudoflavonifractor phocaeensis	0.209271	3.37509	0.0648419	0.47013	0.585579	0.83621	0.638325	0.893394	0.893394		ALDEx2_t
0.40 mg/mL - 0 mg/mL	p__Firmicutes|c__Clostridia|o__Clostridiales|f__Clostridiaceae|g__Clostridium|s__Clostridium sp. SY8519	0.665223	3.93857	0.128997	0.425974	0.515914	0.812167	0.61369	0.873208	0.873208		ALDEx2_t
0.40 mg/mL - 0 mg/mL	p__Firmicutes|c__Clostridia|o__Clostridiales|f__Hungateiclostridiaceae|g__Hungateiclostridium|s__Hungateiclostridium straminisolvens	0.827896	4.14888	0.195176	0.415584	0.54158	0.824475	0.536548	0.850398	0.850398		ALDEx2_t
0.40 mg/mL - 0 mg/mL	p__Firmicutes|c__Clostridia|o__Clostridiales|f__Hungateiclostridiaceae|g__Hungateiclostridium|s__Hungateiclostridium thermocellum	1.41348	4.35624	0.267113	0.359375	0.487362	0.801104	0.458632	0.823308	0.823308		ALDEx2_t
0.40 mg/mL - 0 mg/mL	p__Firmicutes|c__Clostridia|o__Clostridiales|f__Lachnospiraceae|g__Anaerostipes|s__Anaerostipes butyraticus	0.634243	2.61852	0.206284	0.374026	0.378686	0.748094	0.477752	0.809613	0.809613		ALDEx2_t
0.40 mg/mL - 0 mg/mL	p__Firmicutes|c__Clostridia|o__Clostridiales|f__Lachnospiraceae|g__Anaerostipes|s__Anaerostipes rhamnosivorans	-0.847981	2.93692	-0.256857	0.358442	0.3997	0.763255	0.402844	0.766928	0.766928		ALDEx2_t
0.40 mg/mL - 0 mg/mL	p__Firmicutes|c__Clostridia|o__Clostridiales|f__Clostridiaceae|g__Falcatimonas|s__Falcatimonas natans	1.88541	3.95472	0.411109	0.28125	0.292708	0.694358	0.280114	0.704211	0.704211		ALDEx2_t
0.40 mg/mL - 0 mg/mL	p__Firmicutes|c__Erysipelotrichia|o__Erysipelotrichales|f__Erysipelotrichaceae|g__Faecalitalea|s__Faecalitalea cylindroides	1.97446	4.80664	0.328706	0.320313	0.383043	0.741897	0.402348	0.773876	0.773876		ALDEx2_t
0.40 mg/mL - 0 mg/mL	p__Firmicutes|c__Clostridia|o__Clostridiales|f__Lachnospiraceae|g__Lachnoclostridium|s__Lachnoclostridium pacaense	-0.716984	3.44413	-0.169169	0.403646	0.472072	0.799851	0.495921	0.830248	0.830248		ALDEx2_t
0.40 mg/mL - 0 mg/mL	p__Firmicutes|c__Clostridia|o__Clostridiales|f__Lachnospiraceae|g__Parasporobacterium|s__Parasporobacterium paucivorans	0.762691	4.52908	0.138412	0.436364	0.576174	0.830289	0.596822	0.869027	0.869027		ALDEx2_t
0.40 mg/mL - 0 mg/mL	p__Firmicutes|c__Clostridia|o__Clostridiales|f__Ruminococcaceae|g__Pseudoflavonifractor|s__Pseudoflavonifractor capillosus	-1.63528	3.65232	-0.397408	0.301299	0.29857	0.718946	0.278351	0.704127	0.704127		ALDEx2_t
0.40 mg/mL - 0 mg/mL	p__Firmicutes|c__Clostridia|o__Clostridiales|f__Clostridiaceae|g__Hungatella|s__Hungatella xylanolytica	1.82458	4.82314	0.323247	0.32987	0.375086	0.745748	0.377035	0.764949	0.764949		ALDEx2_t
0.40 mg/mL - 0 mg/mL	p__Firmicutes|c__Clostridia|o__Clostridiales|f__|g__Intestinimonas|s__Intestinimonas butyriciproducens	-1.39081	4.05252	-0.279954	0.342857	0.411967	0.762294	0.407316	0.777693	0.777693		ALDEx2_t
0.40 mg/mL - 0 mg/mL	p__Tenericutes|c__Mollicutes|o__Entomoplasmatales|f__Spiroplasmataceae|g__Spiroplasma|s__Spiroplasma lampyridicola	0.810169	4.93535	0.158038	0.418182	0.49675	0.804881	0.556769	0.850405	0.850405		ALDEx2_t
0.40 mg/mL - 0 mg/mL	p__Firmicutes|c__Clostridia|o__Clostridiales|f__Clostridiaceae|g__Clostridium|s__Clostridium saudiense	0.421371	4.54498	0.0879754	0.458333	0.512129	0.812381	0.567987	0.866363	0.866363		ALDEx2_t
0.40 mg/mL - 0 mg/mL	p__Firmicutes|c__Clostridia|o__Clostridiales|f__Eubacteriaceae|g__Eubacterium|s__Eubacterium oxidoreducens	-2.2984	3.83918	-0.473111	0.231771	0.222717	0.662075	0.18324	0.600854	0.600854		ALDEx2_t
0.40 mg/mL - 0 mg/mL	p__Firmicutes|c__Clostridia|o__Clostridiales|f__Lachnospiraceae|g__Faecalicatena|s__Faecalicatena fissicatena	-1.35323	4.26667	-0.306751	0.348958	0.425213	0.771846	0.410183	0.781174	0.781174		ALDEx2_t
0.40 mg/mL - 0 mg/mL	p__Firmicutes|c__Clostridia|o__Clostridiales|f__Peptococcaceae|g__Dehalobacterium|s__Dehalobacterium formicoaceticum	-0.128128	4.58598	-0.0284326	0.480519	0.540275	0.82159	0.606301	0.870305	0.870305		ALDEx2_t
0.40 mg/mL - 0 mg/mL	p__Firmicutes|c__Clostridia|o__Clostridiales|f__|g__Colidextribacter|s__Colidextribacter massiliensis	0.131668	3.63296	0.0204908	0.489583	0.595789	0.833478	0.641947	0.883792	0.883792		ALDEx2_t
0.40 mg/mL - 0 mg/mL	p__Tenericutes|c__Mollicutes|o__Entomoplasmatales|f__Spiroplasmataceae|g__Spiroplasma|s__Spiroplasma chrysopicola	1.31116	4.91957	0.254895	0.381818	0.478027	0.791176	0.536068	0.836581	0.836581		ALDEx2_t
0.40 mg/mL - 0 mg/mL	p__Firmicutes|c__Clostridia|o__Clostridiales|f__Lachnospiraceae|g__Bariatricus|s__Bariatricus massiliensis	0.571339	4.19199	0.143522	0.444156	0.499264	0.79837	0.566872	0.853255	0.853255		ALDEx2_t
0.40 mg/mL - 0 mg/mL	p__Firmicutes|c__Clostridia|o__Clostridiales|f__Peptococcaceae|g__|s__Peptococcaceae bacterium DCMF	0.221696	4.1605	0.039376	0.476563	0.553484	0.820375	0.633199	0.880709	0.880709		ALDEx2_t
0.40 mg/mL - 0 mg/mL	p__Firmicutes|c__Clostridia|o__Clostridiales|f__Ruminococcaceae|g__Acutalibacter|s__Acutalibacter muris	-0.630159	3.75964	-0.156641	0.412987	0.510113	0.811844	0.529123	0.84051	0.84051		ALDEx2_t
0.40 mg/mL - 0 mg/mL	p__Firmicutes|c__Clostridia|o__Clostridiales|f__Ruminococcaceae|g__Hydrogenoanaerobacterium|s__Hydrogenoanaerobacterium saccharovorans	0.253017	4.26892	0.0519066	0.473958	0.568355	0.828614	0.63352	0.883454	0.883454		ALDEx2_t
0.40 mg/mL - 0 mg/mL	p__Firmicutes|c__Clostridia|o__Clostridiales|f__Clostridiaceae|g__Clostridium|s__Clostridium sp. JN-9	-0.549398	4.06952	-0.125576	0.427083	0.547674	0.82276	0.576446	0.852556	0.852556		ALDEx2_t
0.40 mg/mL - 0 mg/mL	p__Firmicutes|c__Clostridia|o__Clostridiales|f__Lachnospiraceae|g__Anaerotignum|s__Anaerotignum lactatifermentans	-1.15083	3.87724	-0.266055	0.356771	0.435628	0.781782	0.434855	0.798381	0.798381		ALDEx2_t
0.40 mg/mL - 0 mg/mL	p__Firmicutes|c__Clostridia|o__Clostridiales|f__Peptostreptococcaceae|g__Clostridioides|s__Clostridioides difficile	0.277018	4.14423	0.0480055	0.462338	0.509213	0.816383	0.568518	0.867747	0.867747		ALDEx2_t
0.40 mg/mL - 0 mg/mL	p__Firmicutes|c__Clostridia|o__Clostridiales|f__Ruminococcaceae|g__|s__[Clostridium] methylpentosum	0.224882	3.37935	0.0501914	0.460938	0.535488	0.817201	0.610482	0.862197	0.862197		ALDEx2_t
0.40 mg/mL - 0 mg/mL	p__Firmicutes|c__Clostridia|o__Clostridiales|f__Lachnospiraceae|g__Schaedlerella|s__Schaedlerella arabinosiphila	-1.42973	3.85899	-0.315158	0.327273	0.437043	0.771735	0.419018	0.763404	0.763404		ALDEx2_t
0.40 mg/mL - 0 mg/mL	p__Firmicutes|c__Clostridia|o__Clostridiales|f__Clostridiaceae|g__Clostridium|s__Clostridium disporicum	-0.24318	4.45745	-0.0482876	0.472727	0.535326	0.812367	0.590224	0.860723	0.860723		ALDEx2_t
0.40 mg/mL - 0 mg/mL	p__Tenericutes|c__Mollicutes|o__Entomoplasmatales|f__Spiroplasmataceae|g__Spiroplasma|s__Spiroplasma syrphidicola	2.77539	4.41815	0.57132	0.252604	0.247694	0.643088	0.201332	0.637718	0.637718		ALDEx2_t
0.40 mg/mL - 0 mg/mL	p__Firmicutes|c__Clostridia|o__Clostridiales|f__Lachnospiraceae|g__Anaerobutyricum|s__Anaerobutyricum hallii	0.10666	4.04766	0.0303204	0.485714	0.551469	0.823114	0.602022	0.874227	0.874227		ALDEx2_t
0.40 mg/mL - 0 mg/mL	p__Firmicutes|c__Clostridia|o__Clostridiales|f__Lachnospiraceae|g__Roseburia|s__Roseburia hominis	-0.780588	3.83815	-0.190455	0.392208	0.468251	0.787617	0.464805	0.803425	0.803425		ALDEx2_t
0.40 mg/mL - 0 mg/mL	p__Firmicutes|c__Clostridia|o__Clostridiales|f__Lachnospiraceae|g__Anaerocolumna|s__Anaerocolumna xylanovorans	-1.2845	3.67657	-0.258626	0.358442	0.454112	0.789418	0.438377	0.790171	0.790171		ALDEx2_t
0.40 mg/mL - 0 mg/mL	p__Firmicutes|c__Clostridia|o__Clostridiales|f__Ruminococcaceae|g__Paludicola|s__Paludicola psychrotolerans	0.0178244	3.77778	0.00364022	0.496104	0.521525	0.809772	0.571849	0.852905	0.852905		ALDEx2_t
0.40 mg/mL - 0 mg/mL	p__Firmicutes|c__Clostridia|o__Clostridiales|f__Ruminococcaceae|g__Faecalibacterium|s__Faecalibacterium prausnitzii	0.015894	3.3119	0.00214785	0.498701	0.565171	0.82799	0.622202	0.877222	0.877222		ALDEx2_t
0.40 mg/mL - 0 mg/mL	p__Firmicutes|c__Clostridia|o__Clostridiales|f__Hungateiclostridiaceae|g__Hungateiclostridium|s__Hungateiclostridium clariflavum	0.0640149	3.89169	0.0126355	0.492188	0.598087	0.841222	0.645447	0.89163	0.89163		ALDEx2_t
0.40 mg/mL - 0 mg/mL	p__Firmicutes|c__Clostridia|o__Clostridiales|f__Ruminococcaceae|g__Negativibacillus|s__Negativibacillus massiliensis	0.32278	3.80144	0.0834136	0.45974	0.494842	0.801677	0.516846	0.829854	0.829854		ALDEx2_t
0.40 mg/mL - 0 mg/mL	p__Firmicutes|c__Clostridia|o__Clostridiales|f__|g__Ihubacter|s__Ihubacter massiliensis	-0.126032	4.32546	-0.0190116	0.485714	0.510008	0.81126	0.581575	0.865088	0.865088		ALDEx2_t
0.40 mg/mL - 0 mg/mL	p__Firmicutes|c__Clostridia|o__Clostridiales|f__Clostridiaceae|g__Clostridium|s__Clostridium beijerinckii	0.579491	4.01813	0.112622	0.428571	0.479943	0.788382	0.556512	0.848333	0.848333		ALDEx2_t
0.40 mg/mL - 0 mg/mL	p__Firmicutes|c__Clostridia|o__Clostridiales|f__Ruminococcaceae|g__Anaeromassilibacillus|s__Anaeromassilibacillus senegalensis	0.151688	3.37219	0.0487757	0.471354	0.499072	0.805918	0.537906	0.841008	0.841008		ALDEx2_t
0.40 mg/mL - 0 mg/mL	p__Firmicutes|c__Erysipelotrichia|o__Erysipelotrichales|f__Erysipelotrichaceae|g__Turicibacter|s__Turicibacter sp. H121	-0.162568	4.52563	-0.0309878	0.484375	0.501645	0.80412	0.53632	0.841744	0.841744		ALDEx2_t
0.40 mg/mL - 0 mg/mL	p__Firmicutes|c__Clostridia|o__Clostridiales|f__Lachnospiraceae|g__Faecalicatena|s__Faecalicatena contorta	-1.32639	3.37173	-0.309926	0.32987	0.353912	0.731621	0.338122	0.724011	0.724011		ALDEx2_t
0.40 mg/mL - 0 mg/mL	p__Firmicutes|c__Clostridia|o__Clostridiales|f__Clostridiaceae|g__Clostridium|s__Clostridium subterminale	2.09103	4.02406	0.497079	0.25	0.234256	0.626758	0.198051	0.629837	0.629837		ALDEx2_t
0.40 mg/mL - 0 mg/mL	p__Firmicutes|c__Clostridia|o__Clostridiales|f__Lachnospiraceae|g__Blautia|s__Blautia sp. N6H1-15	0.897476	3.74662	0.183154	0.392208	0.427604	0.762455	0.443488	0.786245	0.786245		ALDEx2_t
0.40 mg/mL - 0 mg/mL	p__Firmicutes|c__Clostridia|o__Clostridiales|f__Ruminococcaceae|g__Papillibacter|s__Papillibacter cinnamivorans	0.325861	4.01753	0.0642305	0.45974	0.532758	0.811316	0.577417	0.859495	0.859495		ALDEx2_t
0.40 mg/mL - 0 mg/mL	p__Firmicutes|c__Clostridia|o__Clostridiales|f__Clostridiaceae|g__Butyricicoccus|s__Butyricicoccus pullicaecorum	0.439045	3.96747	0.101051	0.453125	0.506271	0.796289	0.553122	0.848815	0.848815		ALDEx2_t
0.40 mg/mL - 0 mg/mL	p__Firmicutes|c__Clostridia|o__Clostridiales|f__Lachnospiraceae|g__Anaerotignum|s__Anaerotignum aminivorans	0.478635	4.00332	0.112722	0.4375	0.514115	0.808333	0.573691	0.860349	0.860349		ALDEx2_t
0.40 mg/mL - 0 mg/mL	p__Firmicutes|c__Clostridia|o__Clostridiales|f__Ruminococcaceae|g__Tepidibaculum|s__Tepidibaculum saccharolyticum	1.60107	4.37619	0.278989	0.332468	0.376715	0.722291	0.364091	0.741076	0.741076		ALDEx2_t
0.40 mg/mL - 0 mg/mL	p__Firmicutes|c__Clostridia|o__Clostridiales|f__Ruminococcaceae|g__Harryflintia|s__Harryflintia acetispora	-0.527795	4.26927	-0.098559	0.438961	0.503643	0.806495	0.541338	0.844826	0.844826		ALDEx2_t
0.40 mg/mL - 0 mg/mL	p__Firmicutes|c__Clostridia|o__Clostridiales|f__Clostridiaceae|g__Clostridium|s__Clostridium ventriculi	0.161562	4.32879	0.0417252	0.472727	0.519145	0.814356	0.612367	0.870049	0.870049		ALDEx2_t
0.40 mg/mL - 0 mg/mL	p__Firmicutes|c__Clostridia|o__Clostridiales|f__Lachnospiraceae|g__Lachnoclostridium|s__[Clostridium] scindens	0.260619	4.00874	0.0604232	0.475325	0.508821	0.801074	0.57082	0.848639	0.848639		ALDEx2_t
0.40 mg/mL - 0 mg/mL	p__Firmicutes|c__Clostridia|o__Clostridiales|f__|g__Massilistercora|s__Massilistercora timonensis	-0.857059	4.11432	-0.194226	0.408854	0.543478	0.820228	0.551343	0.843735	0.843735		ALDEx2_t
0.40 mg/mL - 0 mg/mL	p__Firmicutes|c__Clostridia|o__Clostridiales|f__Hungateiclostridiaceae|g__|s__Hungateiclostridiaceae bacterium KB18	-0.304377	4.17099	-0.0571495	0.473958	0.540244	0.813295	0.573276	0.84987	0.84987		ALDEx2_t
0.40 mg/mL - 0 mg/mL	p__Firmicutes|c__Clostridia|o__Clostridiales|f__|g__Monoglobus|s__Monoglobus pectinilyticus	1.37211	4.11111	0.265098	0.374026	0.444548	0.761767	0.479896	0.799088	0.799088		ALDEx2_t
0.40 mg/mL - 0 mg/mL	p__Firmicutes|c__Clostridia|o__Clostridiales|f__Ruminococcaceae|g__Caproiciproducens|s__Caproiciproducens galactitolivorans	0.0695617	4.32077	0.018551	0.490909	0.474853	0.791279	0.538491	0.844314	0.844314		ALDEx2_t
0.40 mg/mL - 0 mg/mL	p__Firmicutes|c__Clostridia|o__Clostridiales|f__Ruminococcaceae|g__|s__[Clostridium] viride	-0.321066	4.48527	-0.0622686	0.460938	0.469702	0.795499	0.53602	0.83869	0.83869		ALDEx2_t
0.40 mg/mL - 0 mg/mL	p__Firmicutes|c__Clostridia|o__Clostridiales|f__Lachnospiraceae|g__Marvinbryantia|s__Marvinbryantia formatexigens	-0.185928	4.03919	-0.0558361	0.473958	0.457179	0.785518	0.495531	0.826239	0.826239		ALDEx2_t
0.40 mg/mL - 0 mg/mL	p__Firmicutes|c__Clostridia|o__Clostridiales|f__|g__|s__Clostridiales bacterium CCNA10	-0.500499	4.16571	-0.106442	0.453125	0.545947	0.827247	0.586978	0.861641	0.861641		ALDEx2_t
0.40 mg/mL - 0 mg/mL	p__Firmicutes|c__Clostridia|o__Clostridiales|f__Peptostreptococcaceae|g__Romboutsia|s__Romboutsia timonensis	0.644785	4.06656	0.140741	0.436364	0.460504	0.782907	0.500188	0.826408	0.826408		ALDEx2_t
0.40 mg/mL - 0 mg/mL	p__Verrucomicrobia|c__Verrucomicrobiae|o__Verrucomicrobiales|f__Akkermansiaceae|g__Akkermansia|s__Akkermansia muciniphila	0.432757	4.28017	0.0920091	0.442708	0.484331	0.791055	0.524634	0.827376	0.827376		ALDEx2_t
0.40 mg/mL - 1.60 mg/mL	p__Firmicutes|c__Clostridia|o__Clostridiales|f__Lachnospiraceae|g__|s__Lachnospiraceae bacterium GAM79	-0.522326	2.47757	-0.167463	0.379221	0.253375	0.74161	0.540678	0.879278	0.879278		ALDEx2_t
0.40 mg/mL - 1.60 mg/mL	p__Firmicutes|c__Clostridia|o__Clostridiales|f__Clostridiaceae|g__Clostridium|s__Clostridium sp. BNL1100	0.3624	3.75534	0.0933062	0.436364	0.512832	0.841707	0.770417	0.945312	0.945312		ALDEx2_t
0.40 mg/mL - 1.60 mg/mL	p__Firmicutes|c__Clostridia|o__Clostridiales|f__Eubacteriaceae|g__Eubacterium|s__Eubacterium ventriosum	1.47308	2.65869	0.489249	0.322917	0.281116	0.753636	0.340498	0.809798	0.809798		ALDEx2_t
0.40 mg/mL - 1.60 mg/mL	p__Firmicutes|c__Clostridia|o__Clostridiales|f__Lachnospiraceae|g__Lacrimispora|s__Lacrimispora saccharolytica	-0.614545	3.05421	-0.234308	0.335065	0.396641	0.79842	0.39023	0.827073	0.827073		ALDEx2_t
0.40 mg/mL - 1.60 mg/mL	p__Firmicutes|c__Clostridia|o__Clostridiales|f__Lachnospiraceae|g__Eisenbergiella|s__Eisenbergiella massiliensis	-1.08169	3.45798	-0.318723	0.309896	0.242857	0.735799	0.352642	0.812706	0.812706		ALDEx2_t
0.40 mg/mL - 1.60 mg/mL	p__Firmicutes|c__Clostridia|o__Clostridiales|f__Eubacteriaceae|g__Eubacterium|s__Eubacterium coprostanoligenes	3.603	5.20352	0.73789	0.210938	0.0589254	0.626224	0.0813613	0.658486	0.658486		ALDEx2_t
0.40 mg/mL - 1.60 mg/mL	p__Firmicutes|c__Clostridia|o__Clostridiales|f__Hungateiclostridiaceae|g__Hungateiclostridium|s__Hungateiclostridium alkalicellulosi	0.939982	3.824	0.205786	0.388021	0.335314	0.774573	0.517282	0.87326	0.87326		ALDEx2_t
0.40 mg/mL - 1.60 mg/mL	p__Firmicutes|c__Clostridia|o__Clostridiales|f__|g__Flintibacter|s__Flintibacter sp. KGMB00164	-1.57426	2.77247	-0.509279	0.25	0.304961	0.758731	0.162744	0.714909	0.714909		ALDEx2_t
0.40 mg/mL - 1.60 mg/mL	p__Firmicutes|c__Clostridia|o__Clostridiales|f__Lachnospiraceae|g__Lacrimispora|s__Lacrimispora sphenoides	-0.616769	4.21396	-0.121976	0.379221	0.667498	0.892149	0.505263	0.86319	0.86319		ALDEx2_t
0.40 mg/mL - 1.60 mg/mL	p__Firmicutes|c__Clostridia|o__Clostridiales|f__Christensenellaceae|g__Christensenella|s__Christensenella minuta	1.34121	2.98647	0.368809	0.376623	0.269548	0.745676	0.494146	0.868933	0.868933		ALDEx2_t
0.40 mg/mL - 1.60 mg/mL	p__Firmicutes|c__Clostridia|o__Clostridiales|f__Hungateiclostridiaceae|g__Pseudoclostridium|s__Pseudoclostridium thermosuccinogenes	0.332743	5.02195	0.04135	0.472727	0.61369	0.873948	0.736027	0.93835	0.93835		ALDEx2_t
0.40 mg/mL - 1.60 mg/mL	p__Firmicutes|c__Clostridia|o__Clostridiales|f__Clostridiaceae|g__Hungatella|s__Hungatella hathewayi	-0.611456	3.06903	-0.168935	0.427083	0.487971	0.83181	0.683631	0.920028	0.920028		ALDEx2_t
0.40 mg/mL - 1.60 mg/mL	p__Firmicutes|c__Clostridia|o__Clostridiales|f__Lachnospiraceae|g__Kineothrix|s__Kineothrix alysoides	-2.27949	3.92478	-0.587626	0.241559	0.1121	0.671776	0.146577	0.71095	0.71095		ALDEx2_t
0.40 mg/mL - 1.60 mg/mL	p__Firmicutes|c__Clostridia|o__Clostridiales|f__Eubacteriaceae|g__Eubacterium|s__Eubacterium xylanophilum	0.813447	1.80964	0.325805	0.285714	0.150777	0.690363	0.261374	0.754844	0.754844		ALDEx2_t
0.40 mg/mL - 1.60 mg/mL	p__Firmicutes|c__Clostridia|o__Clostridiales|f__Lachnospiraceae|g__Anaerotaenia|s__Anaerotaenia torta	-1.4968	3.34358	-0.438318	0.286458	0.212111	0.721482	0.223984	0.751711	0.751711		ALDEx2_t
0.40 mg/mL - 1.60 mg/mL	p__Firmicutes|c__Clostridia|o__Clostridiales|f__Hungateiclostridiaceae|g__Hungateiclostridium|s__Hungateiclostridium aldrichii	0.362608	6.03585	0.0606866	0.466146	0.748401	0.918395	0.836531	0.955433	0.955433		ALDEx2_t
0.40 mg/mL - 1.60 mg/mL	p__Firmicutes|c__Clostridia|o__Clostridiales|f__Oscillospiraceae|g__Dysosmobacter|s__Dysosmobacter welbionis	-1.84166	4.4618	-0.365762	0.303896	0.429268	0.807168	0.285418	0.788914	0.788914		ALDEx2_t
0.40 mg/mL - 1.60 mg/mL	p__Bacteroidetes|c__Bacteroidia|o__Bacteroidales|f__Rikenellaceae|g__Alistipes|s__Alistipes dispar	-4.34064	5.82531	-0.675857	0.257143	0.13631	0.643284	0.199753	0.695125	0.695125		ALDEx2_t
0.40 mg/mL - 1.60 mg/mL	p__Firmicutes|c__Clostridia|o__Clostridiales|f__Hungateiclostridiaceae|g__Hungateiclostridium|s__Hungateiclostridium saccincola	0.643748	4.2376	0.120786	0.432292	0.703089	0.900637	0.760346	0.941457	0.941457		ALDEx2_t
0.40 mg/mL - 1.60 mg/mL	p__Firmicutes|c__Clostridia|o__Clostridiales|f__Ruminococcaceae|g__|s__[Eubacterium] siraeum	-1.75831	4.27581	-0.348407	0.335938	0.322983	0.763018	0.319415	0.798776	0.798776		ALDEx2_t
0.40 mg/mL - 1.60 mg/mL	p__Firmicutes|c__Clostridia|o__Clostridiales|f__Peptostreptococcaceae|g__Romboutsia|s__Romboutsia ilealis	-0.150634	6.28721	-0.0191566	0.493506	0.715349	0.902481	0.802885	0.949771	0.949771		ALDEx2_t
0.40 mg/mL - 1.60 mg/mL	p__Firmicutes|c__Clostridia|o__Clostridiales|f__Lachnospiraceae|g__Lachnoclostridium|s__Lachnoclostridium phytofermentans	-2.46027	3.49817	-0.569313	0.231169	0.224644	0.721744	0.103834	0.671273	0.671273		ALDEx2_t
0.40 mg/mL - 1.60 mg/mL	p__Firmicutes|c__Bacilli|o__Lactobacillales|f__Lactobacillaceae|g__Lactobacillus|s__Lactobacillus johnsonii	1.91232	4.49106	0.40153	0.298701	0.404455	0.795448	0.28714	0.791219	0.791219		ALDEx2_t
0.40 mg/mL - 1.60 mg/mL	p__Firmicutes|c__Clostridia|o__Clostridiales|f__Ruminococcaceae|g__Flavonifractor|s__Flavonifractor plautii	-1.58637	4.89686	-0.297299	0.346354	0.476496	0.818517	0.423465	0.831593	0.831593		ALDEx2_t
0.40 mg/mL - 1.60 mg/mL	p__Bacteroidetes|c__Bacteroidia|o__Bacteroidales|f__Muribaculaceae|g__Muribaculum|s__Muribaculum intestinale	-1.86449	5.14336	-0.352574	0.342857	0.386428	0.778475	0.391153	0.811852	0.811852		ALDEx2_t
0.40 mg/mL - 1.60 mg/mL	p__Firmicutes|c__Clostridia|o__Clostridiales|f__Ruminococcaceae|g__Anaerotruncus|s__Anaerotruncus rubiinfantis	-1.88051	2.96475	-0.541485	0.239584	0.214003	0.714868	0.130094	0.680224	0.680224		ALDEx2_t
0.40 mg/mL - 1.60 mg/mL	p__Firmicutes|c__Clostridia|o__Clostridiales|f__Lachnospiraceae|g__Herbinix|s__Herbinix luporum	-2.35784	2.95371	-0.71987	0.223959	0.0940036	0.65478	0.100712	0.670923	0.670923		ALDEx2_t
0.40 mg/mL - 1.60 mg/mL	p__Firmicutes|c__Clostridia|o__Clostridiales|f__Ruminococcaceae|g__Anaeromassilibacillus|s__Anaeromassilibacillus senegalensis	-2.33252	5.49165	-0.45324	0.298701	0.271297	0.72078	0.355699	0.776519	0.776519		ALDEx2_t
0.40 mg/mL - 1.60 mg/mL	p__Firmicutes|c__Clostridia|o__Clostridiales|f__Lachnospiraceae|g__Blautia|s__Blautia producta	-1.74706	4.24701	-0.330055	0.332468	0.317557	0.761041	0.348209	0.806501	0.806501		ALDEx2_t
0.40 mg/mL - 1.60 mg/mL	p__Firmicutes|c__Clostridia|o__Clostridiales|f__Ruminococcaceae|g__Phocea|s__Phocea massiliensis	-0.58965	4.16129	-0.124601	0.415584	0.519319	0.840747	0.613059	0.894125	0.894125		ALDEx2_t
0.40 mg/mL - 1.60 mg/mL	p__Firmicutes|c__Clostridia|o__Clostridiales|f__Hungateiclostridiaceae|g__Hungateiclostridium|s__Hungateiclostridium cellulolyticum	1.21303	5.55668	0.215105	0.372396	0.583504	0.865887	0.551355	0.884223	0.884223		ALDEx2_t
0.40 mg/mL - 1.60 mg/mL	p__Firmicutes|c__Clostridia|o__Clostridiales|f__Lachnospiraceae|g__Acetatifactor|s__Acetatifactor muris	0.129464	5.58001	0.0208291	0.481771	0.698444	0.901146	0.815271	0.952536	0.952536		ALDEx2_t
0.40 mg/mL - 1.60 mg/mL	p__Firmicutes|c__Clostridia|o__Clostridiales|f__Lachnospiraceae|g__Lachnospira|s__Lachnospira eligens	2.72045	2.55553	0.921956	0.127605	0.0313459	0.549974	0.026973	0.528362	0.528362		ALDEx2_t
0.40 mg/mL - 1.60 mg/mL	p__Firmicutes|c__Clostridia|o__Clostridiales|f__Lachnospiraceae|g__Faecalimonas|s__Faecalimonas umbilicata	-0.839726	4.72409	-0.188524	0.375	0.543244	0.843488	0.536359	0.86992	0.86992		ALDEx2_t
0.40 mg/mL - 1.60 mg/mL	p__Firmicutes|c__Clostridia|o__Clostridiales|f__Lachnospiraceae|g__Lachnoclostridium|s__Lachnoclostridium sp. YL32	-0.0381984	3.58761	-0.00610785	0.493506	0.634251	0.879658	0.776031	0.943008	0.943008		ALDEx2_t
0.40 mg/mL - 1.60 mg/mL	p__Firmicutes|c__Clostridia|o__Clostridiales|f__Christensenellaceae|g__Christensenella|s__Christensenella massiliensis	-1.3955	4.06029	-0.291665	0.350649	0.545527	0.845793	0.497383	0.863955	0.863955		ALDEx2_t
0.40 mg/mL - 1.60 mg/mL	p__Firmicutes|c__Erysipelotrichia|o__Erysipelotrichales|f__Erysipelotrichaceae|g__Breznakia|s__Breznakia pachnodae	3.5276	5.067	0.612093	0.241559	0.148701	0.667872	0.148086	0.694447	0.694447		ALDEx2_t
0.40 mg/mL - 1.60 mg/mL	p__Firmicutes|c__Clostridia|o__Clostridiales|f__Hungateiclostridiaceae|g__Ruminiclostridium|s__Ruminiclostridium cellobioparum	-0.198698	5.12806	-0.0325343	0.472727	0.676325	0.892575	0.804113	0.951174	0.951174		ALDEx2_t
0.40 mg/mL - 1.60 mg/mL	p__Firmicutes|c__Clostridia|o__Clostridiales|f__Lachnospiraceae|g__Blautia|s__Blautia sp. YL58	-1.32824	4.19452	-0.292179	0.330729	0.452539	0.813758	0.395003	0.828656	0.828656		ALDEx2_t
0.40 mg/mL - 1.60 mg/mL	p__Bacteroidetes|c__Bacteroidia|o__Bacteroidales|f__Rikenellaceae|g__Alistipes|s__Alistipes senegalensis	-2.59005	4.92686	-0.452443	0.315104	0.293943	0.730516	0.322992	0.757859	0.757859		ALDEx2_t
0.40 mg/mL - 1.60 mg/mL	p__Firmicutes|c__Clostridia|o__Clostridiales|f__Oscillospiraceae|g__Oscillibacter|s__Oscillibacter valericigenes	-1.26271	4.34641	-0.263771	0.371429	0.500836	0.834423	0.520061	0.870002	0.870002		ALDEx2_t
0.40 mg/mL - 1.60 mg/mL	p__Firmicutes|c__Clostridia|o__Clostridiales|f__Lachnospiraceae|g__Butyrivibrio|s__Butyrivibrio crossotus	-1.42903	3.70321	-0.343866	0.3125	0.35181	0.777099	0.359245	0.816943	0.816943		ALDEx2_t
0.40 mg/mL - 1.60 mg/mL	p__Firmicutes|c__Clostridia|o__Clostridiales|f__Lachnospiraceae|g__Eisenbergiella|s__Eisenbergiella tayi	-0.231618	4.15863	-0.0407044	0.479167	0.624076	0.877892	0.759147	0.93731	0.93731		ALDEx2_t
0.40 mg/mL - 1.60 mg/mL	p__Firmicutes|c__Clostridia|o__Clostridiales|f__Ruminococcaceae|g__Ruminococcus|s__Ruminococcus champanellensis	-2.70994	5.63782	-0.448551	0.319481	0.305894	0.745378	0.388049	0.802165	0.802165		ALDEx2_t
0.40 mg/mL - 1.60 mg/mL	p__Bacteroidetes|c__Bacteroidia|o__Bacteroidales|f__Rikenellaceae|g__Alistipes|s__Alistipes communis	-1.22928	5.98175	-0.169169	0.411458	0.433307	0.801384	0.521151	0.854184	0.854184		ALDEx2_t
0.40 mg/mL - 1.60 mg/mL	p__Firmicutes|c__Clostridia|o__Clostridiales|f__Lachnospiraceae|g__Enterocloster|s__Enterocloster bolteae	-0.288644	2.86093	-0.0758262	0.451948	0.678547	0.893341	0.739968	0.9321	0.9321		ALDEx2_t
0.40 mg/mL - 1.60 mg/mL	p__Firmicutes|c__Clostridia|o__Clostridiales|f__Clostridiaceae|g__Clostridium|s__Clostridium sp. SY8519	-0.391678	5.09763	-0.0614242	0.467532	0.67747	0.8937	0.73527	0.93486	0.93486		ALDEx2_t
0.40 mg/mL - 1.60 mg/mL	p__Firmicutes|c__Clostridia|o__Clostridiales|f__Lachnospiraceae|g__Mediterraneibacter|s__[Ruminococcus] gnavus	-0.632689	4.50848	-0.11292	0.449351	0.573545	0.858328	0.636228	0.90619	0.90619		ALDEx2_t
0.40 mg/mL - 1.60 mg/mL	p__Firmicutes|c__Clostridia|o__Clostridiales|f__Lachnospiraceae|g__Anaerocolumna|s__Anaerocolumna cellulosilytica	-0.0234471	3.65475	-0.00547765	0.497396	0.645689	0.880392	0.76421	0.939818	0.939818		ALDEx2_t
0.40 mg/mL - 1.60 mg/mL	p__Firmicutes|c__Clostridia|o__Clostridiales|f__Peptostreptococcaceae|g__Romboutsia|s__Romboutsia timonensis	-0.509368	5.66629	-0.0716909	0.460938	0.515294	0.833887	0.542549	0.863592	0.863592		ALDEx2_t
0.40 mg/mL - 1.60 mg/mL	p__Firmicutes|c__Clostridia|o__Clostridiales|f__Clostridiaceae|g__Clostridium|s__Clostridium botulinum	1.77513	4.52237	0.312821	0.348958	0.447213	0.805639	0.450229	0.840391	0.840391		ALDEx2_t
0.40 mg/mL - 1.60 mg/mL	p__Candidatus Melainabacteria|c__|o__Vampirovibrionales|f__|g__Vampirovibrio|s__Vampirovibrio chlorellavorus	-1.57127	6.01343	-0.23962	0.385417	0.399375	0.783994	0.506689	0.847703	0.847703		ALDEx2_t
0.40 mg/mL - 1.60 mg/mL	p__Firmicutes|c__Clostridia|o__Clostridiales|f__Clostridiaceae|g__Geosporobacter|s__Geosporobacter ferrireducens	0.751845	4.77255	0.12544	0.446753	0.532182	0.844874	0.678358	0.920435	0.920435		ALDEx2_t
0.40 mg/mL - 1.60 mg/mL	p__Firmicutes|c__Clostridia|o__Clostridiales|f__Lachnospiraceae|g__Lachnoclostridium|s__[Clostridium] populeti	1.37666	3.1377	0.376505	0.267533	0.235243	0.699849	0.207745	0.706951	0.706951		ALDEx2_t
0.40 mg/mL - 1.60 mg/mL	p__Firmicutes|c__Clostridia|o__Clostridiales|f__Hungateiclostridiaceae|g__Anaerobacterium|s__Anaerobacterium chartisolvens	2.72053	4.87586	0.536428	0.267533	0.198529	0.692852	0.174383	0.70736	0.70736		ALDEx2_t
0.40 mg/mL - 1.60 mg/mL	p__Firmicutes|c__Clostridia|o__Clostridiales|f__Lachnospiraceae|g__Blautia|s__Blautia sp. SC05B48	-0.363907	4.16425	-0.079572	0.445313	0.635264	0.881001	0.72816	0.929447	0.929447		ALDEx2_t
0.40 mg/mL - 1.60 mg/mL	p__Bacteroidetes|c__Bacteroidia|o__Bacteroidales|f__Muribaculaceae|g__Duncaniella|s__Duncaniella sp. B8	-0.617536	4.98411	-0.0961234	0.450521	0.518521	0.833784	0.568013	0.858489	0.858489		ALDEx2_t
0.40 mg/mL - 1.60 mg/mL	p__Firmicutes|c__Clostridia|o__Clostridiales|f__Lachnospiraceae|g__Lacrimispora|s__Lacrimispora celerecrescens	0.740977	4.27624	0.157009	0.423377	0.565953	0.853343	0.632922	0.899936	0.899936		ALDEx2_t
0.40 mg/mL - 1.60 mg/mL	p__Firmicutes|c__Clostridia|o__Clostridiales|f__Ruminococcaceae|g__Pseudoflavonifractor|s__Pseudoflavonifractor capillosus	-2.70701	4.38569	-0.594562	0.260417	0.283023	0.726666	0.243475	0.715387	0.715387		ALDEx2_t
0.40 mg/mL - 1.60 mg/mL	p__Firmicutes|c__Clostridia|o__Clostridiales|f__Ruminococcaceae|g__Ruminococcus|s__Ruminococcus bicirculans	-2.11133	4.44501	-0.43406	0.309091	0.34741	0.756295	0.370328	0.780322	0.780322		ALDEx2_t
0.40 mg/mL - 1.60 mg/mL	p__Firmicutes|c__Clostridia|o__Clostridiales|f__Lachnospiraceae|g__Roseburia|s__Roseburia intestinalis	-0.276898	5.05835	-0.0590639	0.462338	0.620909	0.875363	0.694735	0.91913	0.91913		ALDEx2_t
0.40 mg/mL - 1.60 mg/mL	p__Firmicutes|c__Clostridia|o__Clostridiales|f__Lachnospiraceae|g__Faecalicatena|s__Faecalicatena orotica	0.0921141	4.10828	0.0199978	0.490909	0.661761	0.887098	0.741636	0.933237	0.933237		ALDEx2_t
0.40 mg/mL - 1.60 mg/mL	p__Firmicutes|c__Clostridia|o__Clostridiales|f__Lachnospiraceae|g__Lacrimispora|s__Lacrimispora indolis	0.258107	3.63606	0.0561916	0.47013	0.556417	0.842858	0.6608	0.908417	0.908417		ALDEx2_t
0.40 mg/mL - 1.60 mg/mL	p__Bacteroidetes|c__Bacteroidia|o__Bacteroidales|f__Rikenellaceae|g__Alistipes|s__Alistipes finegoldii	-1.10512	4.97004	-0.20355	0.408854	0.453308	0.810035	0.497422	0.847622	0.847622		ALDEx2_t
0.40 mg/mL - 1.60 mg/mL	p__Firmicutes|c__Clostridia|o__Clostridiales|f__Lachnospiraceae|g__Robinsoniella|s__Robinsoniella peoriensis	0.0509977	4.70447	0.00610701	0.496104	0.611413	0.870466	0.686501	0.91826	0.91826		ALDEx2_t
0.40 mg/mL - 1.60 mg/mL	p__Firmicutes|c__Clostridia|o__Clostridiales|f__Ruminococcaceae|g__Paludicola|s__Paludicola psychrotolerans	-1.72112	4.09528	-0.361072	0.293507	0.404686	0.776814	0.325604	0.77455	0.77455		ALDEx2_t
0.40 mg/mL - 1.60 mg/mL	p__Firmicutes|c__Clostridia|o__Clostridiales|f__Catabacteriaceae|g__Catabacter|s__Catabacter hongkongensis	1.11382	4.19851	0.22478	0.407792	0.50371	0.826229	0.563944	0.870518	0.870518		ALDEx2_t
0.40 mg/mL - 1.60 mg/mL	p__Firmicutes|c__Clostridia|o__Clostridiales|f__Hungateiclostridiaceae|g__Ruminiclostridium|s__Ruminiclostridium cellulolyticum	1.39963	4.31965	0.297848	0.361979	0.405913	0.786104	0.445026	0.83557	0.83557		ALDEx2_t
0.40 mg/mL - 1.60 mg/mL	p__Firmicutes|c__Clostridia|o__Clostridiales|f__Christensenellaceae|g__Christensenella|s__Christensenella timonensis	1.1927	3.97529	0.275504	0.358442	0.408956	0.790439	0.459226	0.837967	0.837967		ALDEx2_t
0.40 mg/mL - 1.60 mg/mL	p__Bacteroidetes|c__Bacteroidia|o__Bacteroidales|f__Rikenellaceae|g__Alistipes|s__Alistipes onderdonkii	-0.836353	4.9991	-0.135671	0.440104	0.518182	0.831418	0.582095	0.87096	0.87096		ALDEx2_t
0.40 mg/mL - 1.60 mg/mL	p__Firmicutes|c__Bacilli|o__Lactobacillales|f__Lactobacillaceae|g__Lactobacillus|s__Lactobacillus rogosae	3.64504	3.87804	0.776713	0.145455	0.0660003	0.546161	0.0402514	0.536905	0.536905		ALDEx2_t
0.40 mg/mL - 1.60 mg/mL	p__Firmicutes|c__Clostridia|o__Clostridiales|f__Ruminococcaceae|g__Acetivibrio|s__Acetivibrio ethanolgignens	1.47937	3.02106	0.457265	0.268229	0.20351	0.695186	0.236321	0.734211	0.734211		ALDEx2_t
0.40 mg/mL - 1.60 mg/mL	p__Tenericutes|c__Mollicutes|o__Entomoplasmatales|f__Spiroplasmataceae|g__Spiroplasma|s__Spiroplasma syrphidicola	1.13182	4.63818	0.240909	0.407792	0.521176	0.831379	0.560484	0.882071	0.882071		ALDEx2_t
0.40 mg/mL - 1.60 mg/mL	p__Firmicutes|c__Clostridia|o__Clostridiales|f__Clostridiaceae|g__Clostridium|s__Clostridium merdae	-1.44446	5.20665	-0.253029	0.390625	0.454185	0.802411	0.495991	0.844657	0.844657		ALDEx2_t
0.40 mg/mL - 1.60 mg/mL	p__Firmicutes|c__Clostridia|o__Clostridiales|f__Oscillospiraceae|g__Oscillibacter|s__Oscillibacter sp. PEA192	0.126965	4.39	0.0286496	0.484375	0.626844	0.871239	0.719145	0.921328	0.921328		ALDEx2_t
0.40 mg/mL - 1.60 mg/mL	p__Firmicutes|c__Clostridia|o__Clostridiales|f__Lachnospiraceae|g__Lachnoclostridium|s__[Clostridium] polysaccharolyticum	1.10669	4.45363	0.219558	0.374026	0.52282	0.833515	0.543155	0.866107	0.866107		ALDEx2_t
0.40 mg/mL - 1.60 mg/mL	p__Bacteroidetes|c__Bacteroidia|o__Bacteroidales|f__Rikenellaceae|g__Alistipes|s__Alistipes putredinis	-1.87623	4.70297	-0.390838	0.335065	0.340996	0.756661	0.352091	0.781629	0.781629		ALDEx2_t
0.40 mg/mL - 1.60 mg/mL	p__Firmicutes|c__Erysipelotrichia|o__Erysipelotrichales|f__Erysipelotrichaceae|g__Faecalitalea|s__Faecalitalea cylindroides	1.39425	4.7231	0.239501	0.390625	0.474622	0.811593	0.528279	0.861711	0.861711		ALDEx2_t
0.40 mg/mL - 1.60 mg/mL	p__Firmicutes|c__Clostridia|o__Clostridiales|f__Lachnospiraceae|g__|s__Lachnospiraceae bacterium Choco86	-0.367549	3.60952	-0.0804227	0.463542	0.60126	0.866922	0.652262	0.906906	0.906906		ALDEx2_t
0.40 mg/mL - 1.60 mg/mL	p__Firmicutes|c__Erysipelotrichia|o__Erysipelotrichales|f__Erysipelotrichaceae|g__Turicibacter|s__Turicibacter sp. H121	-2.07916	5.03653	-0.366568	0.3125	0.341487	0.75001	0.374186	0.78526	0.78526		ALDEx2_t
0.40 mg/mL - 1.60 mg/mL	p__Firmicutes|c__Clostridia|o__Clostridiales|f__Lachnospiraceae|g__Lacrimispora|s__Lacrimispora algidixylanolytica	1.21566	3.37544	0.271594	0.346354	0.448371	0.802076	0.442714	0.820754	0.820754		ALDEx2_t
0.40 mg/mL - 1.60 mg/mL	p__Firmicutes|c__Clostridia|o__Clostridiales|f__Clostridiaceae|g__Clostridium|s__Clostridium tarantellae	2.73877	4.15756	0.576478	0.244792	0.245339	0.690824	0.182619	0.69719	0.69719		ALDEx2_t
0.40 mg/mL - 1.60 mg/mL	p__Firmicutes|c__Clostridia|o__Clostridiales|f__Lachnospiraceae|g__Anaerostipes|s__Anaerostipes butyraticus	0.348033	2.8762	0.0997183	0.431169	0.486504	0.823571	0.592634	0.879987	0.879987		ALDEx2_t
0.40 mg/mL - 1.60 mg/mL	p__Firmicutes|c__Clostridia|o__Clostridiales|f__Lachnospiraceae|g__Parasporobacterium|s__Parasporobacterium paucivorans	0.50466	4.53877	0.121241	0.446753	0.599426	0.866716	0.669872	0.912087	0.912087		ALDEx2_t
0.40 mg/mL - 1.60 mg/mL	p__Firmicutes|c__Clostridia|o__Clostridiales|f__Clostridiaceae|g__Clostridium|s__Clostridium sp. JN-9	0.46659	5.18563	0.0780261	0.451948	0.578959	0.857728	0.64094	0.904492	0.904492		ALDEx2_t
0.40 mg/mL - 1.60 mg/mL	p__Firmicutes|c__Clostridia|o__Clostridiales|f__Lachnospiraceae|g__Anaerostipes|s__Anaerostipes hadrus	0.909067	4.08815	0.228092	0.398438	0.526755	0.836518	0.573752	0.877093	0.877093		ALDEx2_t
0.40 mg/mL - 1.60 mg/mL	p__Firmicutes|c__Clostridia|o__Clostridiales|f__Lachnospiraceae|g__Lacrimispora|s__Lacrimispora amygdalina	1.43567	4.06739	0.289512	0.376623	0.432786	0.79828	0.410332	0.809864	0.809864		ALDEx2_t
0.40 mg/mL - 1.60 mg/mL	p__Firmicutes|c__Clostridia|o__Clostridiales|f__Ruminococcaceae|g__Pseudoflavonifractor|s__Pseudoflavonifractor phocaeensis	1.06622	4.1051	0.221454	0.375	0.497236	0.830842	0.505273	0.858852	0.858852		ALDEx2_t
0.40 mg/mL - 1.60 mg/mL	p__Firmicutes|c__Clostridia|o__Clostridiales|f__Hungateiclostridiaceae|g__Hungateiclostridium|s__Hungateiclostridium straminisolvens	1.6136	4.2917	0.320016	0.325521	0.403751	0.782383	0.442235	0.823241	0.823241		ALDEx2_t
0.40 mg/mL - 1.60 mg/mL	p__Tenericutes|c__Mollicutes|o__Entomoplasmatales|f__Spiroplasmataceae|g__Spiroplasma|s__Spiroplasma lampyridicola	1.10761	5.55211	0.150049	0.416667	0.492758	0.826275	0.543626	0.86747	0.86747		ALDEx2_t
0.40 mg/mL - 1.60 mg/mL	p__Bacteroidetes|c__Bacteroidia|o__Bacteroidales|f__Rikenellaceae|g__Alistipes|s__Alistipes megaguti	-2.08881	4.58461	-0.432108	0.322078	0.338361	0.752874	0.33651	0.773345	0.773345		ALDEx2_t
0.40 mg/mL - 1.60 mg/mL	p__Firmicutes|c__Clostridia|o__Clostridiales|f__Lachnospiraceae|g__|s__Lachnospiraceae bacterium oral taxon 500	3.22955	3.68312	0.798621	0.181818	0.110963	0.564972	0.0774434	0.551539	0.551539		ALDEx2_t
0.40 mg/mL - 1.60 mg/mL	p__Firmicutes|c__Clostridia|o__Clostridiales|f__Clostridiaceae|g__Falcatimonas|s__Falcatimonas natans	2.2094	3.402	0.525881	0.241559	0.204054	0.668547	0.20357	0.692133	0.692133		ALDEx2_t
0.40 mg/mL - 1.60 mg/mL	p__Firmicutes|c__Clostridia|o__Clostridiales|f__Hungateiclostridiaceae|g__Hungateiclostridium|s__Hungateiclostridium thermocellum	2.3331	4.74657	0.403445	0.303896	0.313893	0.73434	0.29501	0.750152	0.750152		ALDEx2_t
0.40 mg/mL - 1.60 mg/mL	p__Firmicutes|c__Clostridia|o__Clostridiales|f__|g__Colidextribacter|s__Colidextribacter massiliensis	-0.321928	4.21801	-0.0703782	0.46875	0.611658	0.870585	0.651715	0.907976	0.907976		ALDEx2_t
0.40 mg/mL - 1.60 mg/mL	p__Firmicutes|c__Clostridia|o__Clostridiales|f__Clostridiaceae|g__Hungatella|s__Hungatella xylanolytica	2.63476	4.5674	0.490392	0.277922	0.300125	0.711358	0.29214	0.731926	0.731926		ALDEx2_t
0.40 mg/mL - 1.60 mg/mL	p__Firmicutes|c__Clostridia|o__Clostridiales|f__|g__Monoglobus|s__Monoglobus pectinilyticus	-0.431737	4.40226	-0.0805598	0.453125	0.597821	0.862103	0.660051	0.905875	0.905875		ALDEx2_t
0.40 mg/mL - 1.60 mg/mL	p__Tenericutes|c__Mollicutes|o__Entomoplasmatales|f__Spiroplasmataceae|g__Spiroplasma|s__Spiroplasma chrysopicola	0.677496	4.60752	0.123115	0.438961	0.548009	0.846327	0.611696	0.886877	0.886877		ALDEx2_t
0.40 mg/mL - 1.60 mg/mL	p__Firmicutes|c__Clostridia|o__Clostridiales|f__Clostridiaceae|g__Clostridium|s__Clostridium saudiense	0.0111	4.40874	0.00521185	0.497396	0.530177	0.842969	0.596783	0.885579	0.885579		ALDEx2_t
0.40 mg/mL - 1.60 mg/mL	p__Firmicutes|c__Clostridia|o__Clostridiales|f__Lachnospiraceae|g__Schaedlerella|s__Schaedlerella arabinosiphila	-1.3	4.45194	-0.264551	0.388021	0.47908	0.818965	0.479484	0.83582	0.83582		ALDEx2_t
0.40 mg/mL - 1.60 mg/mL	p__Firmicutes|c__Clostridia|o__Clostridiales|f__|g__Ihubacter|s__Ihubacter massiliensis	-1.10751	4.49842	-0.202526	0.4	0.554281	0.851941	0.582329	0.879396	0.879396		ALDEx2_t
0.40 mg/mL - 1.60 mg/mL	p__Firmicutes|c__Clostridia|o__Clostridiales|f__Lachnospiraceae|g__Bariatricus|s__Bariatricus massiliensis	0.746915	3.84307	0.169351	0.416667	0.457669	0.809112	0.504776	0.840432	0.840432		ALDEx2_t
0.40 mg/mL - 1.60 mg/mL	p__Firmicutes|c__Clostridia|o__Clostridiales|f__Ruminococcaceae|g__Faecalibacterium|s__Faecalibacterium prausnitzii	-0.35007	4.13948	-0.0901676	0.451948	0.539128	0.842119	0.591471	0.881642	0.881642		ALDEx2_t
0.40 mg/mL - 1.60 mg/mL	p__Firmicutes|c__Clostridia|o__Clostridiales|f__Ruminococcaceae|g__Tepidibaculum|s__Tepidibaculum saccharolyticum	0.225806	4.32005	0.050968	0.46875	0.595189	0.868093	0.645014	0.900618	0.900618		ALDEx2_t
0.40 mg/mL - 1.60 mg/mL	p__Firmicutes|c__Clostridia|o__Clostridiales|f__Lachnospiraceae|g__Anaerotignum|s__Anaerotignum lactatifermentans	-0.747143	4.06468	-0.159731	0.401042	0.518283	0.832889	0.545332	0.86258	0.86258		ALDEx2_t
0.40 mg/mL - 1.60 mg/mL	p__Firmicutes|c__Clostridia|o__Clostridiales|f__Peptostreptococcaceae|g__Clostridioides|s__Clostridioides difficile	0.716644	4.51157	0.12639	0.429688	0.545746	0.841412	0.601495	0.885365	0.885365		ALDEx2_t
0.40 mg/mL - 1.60 mg/mL	p__Firmicutes|c__Clostridia|o__Clostridiales|f__Ruminococcaceae|g__|s__[Clostridium] methylpentosum	0.508911	3.70851	0.13105	0.427083	0.502083	0.817236	0.547096	0.859478	0.859478		ALDEx2_t
0.40 mg/mL - 1.60 mg/mL	p__Firmicutes|c__Clostridia|o__Clostridiales|f__|g__Intestinimonas|s__Intestinimonas butyriciproducens	-0.714395	4.32321	-0.150752	0.423377	0.487971	0.816701	0.55602	0.863966	0.863966		ALDEx2_t
0.40 mg/mL - 1.60 mg/mL	p__Firmicutes|c__Clostridia|o__Clostridiales|f__Eubacteriaceae|g__Eubacterium|s__Eubacterium oxidoreducens	-1.50229	4.2458	-0.301747	0.335938	0.402172	0.781403	0.404018	0.787254	0.787254		ALDEx2_t
0.40 mg/mL - 1.60 mg/mL	p__Firmicutes|c__Clostridia|o__Clostridiales|f__Hungateiclostridiaceae|g__Hungateiclostridium|s__Hungateiclostridium clariflavum	-0.143131	4.36195	-0.0288317	0.486979	0.562549	0.854675	0.612346	0.890014	0.890014		ALDEx2_t
0.40 mg/mL - 1.60 mg/mL	p__Firmicutes|c__Clostridia|o__Clostridiales|f__Ruminococcaceae|g__Hydrogenoanaerobacterium|s__Hydrogenoanaerobacterium saccharovorans	0.915367	4.11452	0.197996	0.397403	0.47983	0.813888	0.499597	0.849273	0.849273		ALDEx2_t
0.40 mg/mL - 1.60 mg/mL	p__Firmicutes|c__Clostridia|o__Clostridiales|f__Ruminococcaceae|g__Papillibacter|s__Papillibacter cinnamivorans	-0.293915	3.98486	-0.0669337	0.475325	0.576055	0.855668	0.63275	0.896286	0.896286		ALDEx2_t
0.40 mg/mL - 1.60 mg/mL	p__Firmicutes|c__Clostridia|o__Clostridiales|f__Clostridiaceae|g__Clostridium|s__Clostridium subterminale	1.97025	3.77389	0.46375	0.270833	0.35005	0.727934	0.330727	0.736291	0.736291		ALDEx2_t
0.40 mg/mL - 1.60 mg/mL	p__Firmicutes|c__Clostridia|o__Clostridiales|f__Lachnospiraceae|g__Anaerotignum|s__Anaerotignum aminivorans	0.109629	4.53717	0.0251013	0.486979	0.52669	0.833804	0.588162	0.874586	0.874586		ALDEx2_t
0.40 mg/mL - 1.60 mg/mL	p__Firmicutes|c__Clostridia|o__Clostridiales|f__Peptococcaceae|g__|s__Peptococcaceae bacterium DCMF	0.848659	3.92062	0.16883	0.419271	0.483315	0.809049	0.534749	0.849918	0.849918		ALDEx2_t
0.40 mg/mL - 1.60 mg/mL	p__Firmicutes|c__Clostridia|o__Clostridiales|f__Lachnospiraceae|g__Lachnoclostridium|s__Lachnoclostridium pacaense	1.30642	4.244	0.284768	0.328125	0.397129	0.764741	0.41611	0.791792	0.791792		ALDEx2_t
0.40 mg/mL - 1.60 mg/mL	p__Firmicutes|c__Clostridia|o__Clostridiales|f__Ruminococcaceae|g__Negativibacillus|s__Negativibacillus massiliensis	0.546694	4.29085	0.111383	0.434896	0.551702	0.842962	0.574985	0.863444	0.863444		ALDEx2_t
0.40 mg/mL - 1.60 mg/mL	p__Firmicutes|c__Clostridia|o__Clostridiales|f__Ruminococcaceae|g__Caproiciproducens|s__Caproiciproducens galactitolivorans	-0.879007	4.72183	-0.152532	0.418182	0.53611	0.838496	0.568026	0.869539	0.869539		ALDEx2_t
0.40 mg/mL - 1.60 mg/mL	p__Firmicutes|c__Clostridia|o__Clostridiales|f__Clostridiaceae|g__Butyricicoccus|s__Butyricicoccus pullicaecorum	-0.0311576	4.38146	-0.00558953	0.496104	0.526989	0.838273	0.578635	0.884446	0.884446		ALDEx2_t
0.40 mg/mL - 1.60 mg/mL	p__Firmicutes|c__Clostridia|o__Clostridiales|f__Lachnospiraceae|g__Anaerostipes|s__Anaerostipes rhamnosivorans	0.905039	3.74056	0.213	0.390625	0.432938	0.794402	0.470738	0.820047	0.820047		ALDEx2_t
0.40 mg/mL - 1.60 mg/mL	p__Firmicutes|c__Clostridia|o__Clostridiales|f__Ruminococcaceae|g__Acutalibacter|s__Acutalibacter muris	0.750416	4.13886	0.171896	0.421875	0.551414	0.839901	0.578775	0.867794	0.867794		ALDEx2_t
0.40 mg/mL - 1.60 mg/mL	p__Firmicutes|c__Clostridia|o__Clostridiales|f__Lachnospiraceae|g__Anaerobutyricum|s__Anaerobutyricum hallii	0.5594	4.31579	0.0949061	0.449351	0.461616	0.813778	0.538893	0.861891	0.861891		ALDEx2_t
0.40 mg/mL - 1.60 mg/mL	p__Firmicutes|c__Clostridia|o__Clostridiales|f__Lachnospiraceae|g__Blautia|s__Blautia sp. N6H1-15	1.4774	4.11895	0.329076	0.338542	0.373128	0.763576	0.394717	0.793827	0.793827		ALDEx2_t
0.40 mg/mL - 1.60 mg/mL	p__Firmicutes|c__Clostridia|o__Clostridiales|f__Ruminococcaceae|g__|s__[Clostridium] viride	-0.915754	4.42729	-0.160687	0.420779	0.511298	0.824752	0.530019	0.849514	0.849514		ALDEx2_t
0.40 mg/mL - 1.60 mg/mL	p__Firmicutes|c__Clostridia|o__Clostridiales|f__Clostridiaceae|g__Clostridium|s__Clostridium beijerinckii	1.17541	4.01992	0.242036	0.361039	0.419203	0.778654	0.451028	0.806599	0.806599		ALDEx2_t
0.40 mg/mL - 1.60 mg/mL	p__Firmicutes|c__Clostridia|o__Clostridiales|f__Lachnospiraceae|g__Faecalicatena|s__Faecalicatena fissicatena	0.807111	4.38273	0.151177	0.421875	0.503443	0.816179	0.541144	0.852746	0.852746		ALDEx2_t
0.40 mg/mL - 1.60 mg/mL	p__Firmicutes|c__Clostridia|o__Clostridiales|f__Peptococcaceae|g__Dehalobacterium|s__Dehalobacterium formicoaceticum	0.297766	4.13735	0.0563318	0.475325	0.441847	0.809835	0.515456	0.855664	0.855664		ALDEx2_t
0.40 mg/mL - 1.60 mg/mL	p__Firmicutes|c__Clostridia|o__Clostridiales|f__Clostridiaceae|g__Clostridium|s__Clostridium disporicum	-0.282194	3.78217	-0.0608133	0.47013	0.479175	0.806127	0.51896	0.83884	0.83884		ALDEx2_t
0.40 mg/mL - 1.60 mg/mL	p__Firmicutes|c__Clostridia|o__Clostridiales|f__Lachnospiraceae|g__Faecalicatena|s__Faecalicatena contorta	-0.687323	4.15851	-0.144649	0.429688	0.502341	0.824921	0.55412	0.866757	0.866757		ALDEx2_t
0.40 mg/mL - 1.60 mg/mL	p__Firmicutes|c__Clostridia|o__Clostridiales|f__Lachnospiraceae|g__Lachnoclostridium|s__[Clostridium] scindens	0.0577443	3.99124	0.0168247	0.494792	0.513526	0.825216	0.530449	0.855973	0.855973		ALDEx2_t
0.40 mg/mL - 1.60 mg/mL	p__Firmicutes|c__Clostridia|o__Clostridiales|f__Lachnospiraceae|g__Anaerocolumna|s__Anaerocolumna xylanovorans	0.542345	4.29871	0.105779	0.442708	0.492494	0.821197	0.523784	0.847884	0.847884		ALDEx2_t
0.40 mg/mL - 1.60 mg/mL	p__Firmicutes|c__Clostridia|o__Clostridiales|f__Lachnospiraceae|g__Roseburia|s__Roseburia hominis	0.694097	4.35604	0.130813	0.434896	0.463277	0.806146	0.499932	0.847435	0.847435		ALDEx2_t
0.40 mg/mL - 1.60 mg/mL	p__Firmicutes|c__Clostridia|o__Clostridiales|f__Clostridiaceae|g__Clostridium|s__Clostridium ventriculi	0.248971	4.18334	0.053465	0.471354	0.492832	0.819322	0.536924	0.86165	0.86165		ALDEx2_t
0.40 mg/mL - 1.60 mg/mL	p__Firmicutes|c__Clostridia|o__Clostridiales|f__Hungateiclostridiaceae|g__|s__Hungateiclostridiaceae bacterium KB18	-0.290747	3.95337	-0.040352	0.484375	0.500446	0.822368	0.525282	0.851106	0.851106		ALDEx2_t
0.40 mg/mL - 1.60 mg/mL	p__Firmicutes|c__Clostridia|o__Clostridiales|f__Lachnospiraceae|g__Marvinbryantia|s__Marvinbryantia formatexigens	-0.222258	3.84666	-0.0467318	0.472727	0.481429	0.817797	0.533295	0.857406	0.857406		ALDEx2_t
0.40 mg/mL - 1.60 mg/mL	p__Firmicutes|c__Clostridia|o__Clostridiales|f__|g__|s__Clostridiales bacterium CCNA10	-0.28729	4.04063	-0.0612025	0.455729	0.501054	0.822412	0.547346	0.858917	0.858917		ALDEx2_t
0.40 mg/mL - 2.50 mg/mL	p__Firmicutes|c__Clostridia|o__Clostridiales|f__Lachnospiraceae|g__|s__Lachnospiraceae bacterium GAM79	0.440469	2.49895	0.111839	0.425974	0.601966	0.80895	0.696598	0.897885	0.897885		ALDEx2_t
0.40 mg/mL - 2.50 mg/mL	p__Firmicutes|c__Clostridia|o__Clostridiales|f__Lachnospiraceae|g__Lacrimispora|s__Lacrimispora saccharolytica	-0.0526127	2.27298	-0.0200068	0.492188	0.514519	0.762368	0.867705	0.955831	0.955831		ALDEx2_t
0.40 mg/mL - 2.50 mg/mL	p__Firmicutes|c__Clostridia|o__Clostridiales|f__Eubacteriaceae|g__Eubacterium|s__Eubacterium ventriosum	2.4328	2.68007	0.840979	0.189611	0.0560165	0.408945	0.0691548	0.384116	0.384116		ALDEx2_t
0.40 mg/mL - 2.50 mg/mL	p__Firmicutes|c__Clostridia|o__Clostridiales|f__Clostridiaceae|g__Clostridium|s__Clostridium sp. BNL1100	0.932643	2.48366	0.341652	0.353247	0.313155	0.644481	0.436168	0.761782	0.761782		ALDEx2_t
0.40 mg/mL - 2.50 mg/mL	p__Firmicutes|c__Clostridia|o__Clostridiales|f__Lachnospiraceae|g__Eisenbergiella|s__Eisenbergiella massiliensis	-0.121145	2.46146	-0.0275737	0.472727	0.328608	0.655242	0.801097	0.928621	0.928621		ALDEx2_t
0.40 mg/mL - 2.50 mg/mL	p__Firmicutes|c__Clostridia|o__Clostridiales|f__Eubacteriaceae|g__Eubacterium|s__Eubacterium coprostanoligenes	1.96399	3.98954	0.435394	0.335938	0.264128	0.610942	0.330945	0.696632	0.696632		ALDEx2_t
0.40 mg/mL - 2.50 mg/mL	p__Firmicutes|c__Clostridia|o__Clostridiales|f__|g__Flintibacter|s__Flintibacter sp. KGMB00164	-1.67213	1.62082	-0.946432	0.127605	0.0365906	0.359303	0.0300012	0.28556	0.28556		ALDEx2_t
0.40 mg/mL - 2.50 mg/mL	p__Firmicutes|c__Clostridia|o__Clostridiales|f__Lachnospiraceae|g__Lacrimispora|s__Lacrimispora sphenoides	-0.787991	2.76933	-0.25006	0.375	0.306876	0.642138	0.532298	0.807965	0.807965		ALDEx2_t
0.40 mg/mL - 2.50 mg/mL	p__Firmicutes|c__Clostridia|o__Clostridiales|f__Clostridiaceae|g__Hungatella|s__Hungatella hathewayi	-0.509416	2.14142	-0.182225	0.385417	0.38765	0.68772	0.518596	0.787186	0.787186		ALDEx2_t
0.40 mg/mL - 2.50 mg/mL	p__Firmicutes|c__Clostridia|o__Clostridiales|f__Oscillospiraceae|g__Dysosmobacter|s__Dysosmobacter welbionis	-2.44992	2.75172	-0.787909	0.179221	0.0803549	0.441835	0.0661318	0.371415	0.371415		ALDEx2_t
0.40 mg/mL - 2.50 mg/mL	p__Firmicutes|c__Clostridia|o__Clostridiales|f__Hungateiclostridiaceae|g__Hungateiclostridium|s__Hungateiclostridium alkalicellulosi	2.55632	3.23659	0.733804	0.171875	0.0567738	0.405159	0.0640713	0.365389	0.365389		ALDEx2_t
0.40 mg/mL - 2.50 mg/mL	p__Firmicutes|c__Clostridia|o__Clostridiales|f__Lachnospiraceae|g__Anaerotaenia|s__Anaerotaenia torta	-1.10019	2.47022	-0.309029	0.348958	0.281092	0.623579	0.458984	0.767705	0.767705		ALDEx2_t
0.40 mg/mL - 2.50 mg/mL	p__Firmicutes|c__Clostridia|o__Clostridiales|f__Ruminococcaceae|g__Flavonifractor|s__Flavonifractor plautii	-2.49003	3.31827	-0.71219	0.15625	0.0630713	0.423568	0.0444243	0.326137	0.326137		ALDEx2_t
0.40 mg/mL - 2.50 mg/mL	p__Firmicutes|c__Clostridia|o__Clostridiales|f__Lachnospiraceae|g__Kineothrix|s__Kineothrix alysoides	-0.714031	3.81381	-0.224201	0.38961	0.191147	0.562282	0.595719	0.830116	0.830116		ALDEx2_t
0.40 mg/mL - 2.50 mg/mL	p__Firmicutes|c__Clostridia|o__Clostridiales|f__Ruminococcaceae|g__Phocea|s__Phocea massiliensis	-1.83862	3.61964	-0.478992	0.275325	0.148043	0.523692	0.253439	0.621242	0.621242		ALDEx2_t
0.40 mg/mL - 2.50 mg/mL	p__Firmicutes|c__Clostridia|o__Clostridiales|f__Ruminococcaceae|g__Anaerotruncus|s__Anaerotruncus rubiinfantis	-2.1443	2.31411	-0.855241	0.132468	0.0639647	0.415225	0.0331231	0.297719	0.297719		ALDEx2_t
0.40 mg/mL - 2.50 mg/mL	p__Firmicutes|c__Clostridia|o__Clostridiales|f__Lachnospiraceae|g__Lachnoclostridium|s__Lachnoclostridium phytofermentans	-1.83043	2.43988	-0.62109	0.197403	0.103729	0.470364	0.0873762	0.397702	0.397702		ALDEx2_t
0.40 mg/mL - 2.50 mg/mL	p__Firmicutes|c__Clostridia|o__Clostridiales|f__Christensenellaceae|g__Christensenella|s__Christensenella minuta	2.2589	2.37011	0.927255	0.148052	0.0215659	0.336127	0.0424263	0.327723	0.327723		ALDEx2_t
0.40 mg/mL - 2.50 mg/mL	p__Firmicutes|c__Clostridia|o__Clostridiales|f__Lachnospiraceae|g__Acetatifactor|s__Acetatifactor muris	-1.75266	3.80124	-0.351851	0.327273	0.276912	0.624809	0.381915	0.715891	0.715891		ALDEx2_t
0.40 mg/mL - 2.50 mg/mL	p__Firmicutes|c__Clostridia|o__Clostridiales|f__Oscillospiraceae|g__Oscillibacter|s__Oscillibacter valericigenes	-2.46471	2.81427	-0.795503	0.15065	0.0660801	0.424622	0.0443047	0.324358	0.324358		ALDEx2_t
0.40 mg/mL - 2.50 mg/mL	p__Firmicutes|c__Clostridia|o__Clostridiales|f__Eubacteriaceae|g__Eubacterium|s__Eubacterium xylanophilum	2.63958	1.8191	1.3093	0.031171	0.0111264	0.252174	0.00283571	0.142205	0.142205		ALDEx2_t
0.40 mg/mL - 2.50 mg/mL	p__Bacteroidetes|c__Bacteroidia|o__Bacteroidales|f__Muribaculaceae|g__Muribaculum|s__Muribaculum intestinale	-2.5795	5.27293	-0.42488	0.32987	0.363397	0.660847	0.313301	0.668175	0.668175		ALDEx2_t
0.40 mg/mL - 2.50 mg/mL	p__Firmicutes|c__Clostridia|o__Clostridiales|f__Hungateiclostridiaceae|g__Hungateiclostridium|s__Hungateiclostridium aldrichii	1.82175	5.23137	0.292783	0.395833	0.593444	0.798146	0.592728	0.843718	0.843718		ALDEx2_t
0.40 mg/mL - 2.50 mg/mL	p__Firmicutes|c__Clostridia|o__Clostridiales|f__Hungateiclostridiaceae|g__Pseudoclostridium|s__Pseudoclostridium thermosuccinogenes	2.40412	3.99023	0.498421	0.276042	0.259086	0.590269	0.217101	0.576975	0.576975		ALDEx2_t
0.40 mg/mL - 2.50 mg/mL	p__Firmicutes|c__Clostridia|o__Clostridiales|f__Lachnospiraceae|g__Lachnoclostridium|s__Lachnoclostridium sp. YL32	-0.476452	3.14413	-0.0980806	0.433766	0.579296	0.791932	0.706637	0.888374	0.888374		ALDEx2_t
0.40 mg/mL - 2.50 mg/mL	p__Firmicutes|c__Clostridia|o__Clostridiales|f__Hungateiclostridiaceae|g__Hungateiclostridium|s__Hungateiclostridium saccincola	2.54359	3.91644	0.523046	0.286458	0.247258	0.585805	0.266244	0.619945	0.619945		ALDEx2_t
0.40 mg/mL - 2.50 mg/mL	p__Firmicutes|c__Clostridia|o__Clostridiales|f__Peptostreptococcaceae|g__Romboutsia|s__Romboutsia ilealis	-0.232599	5.21212	-0.0294751	0.485714	0.716078	0.86634	0.810034	0.936558	0.936558		ALDEx2_t
0.40 mg/mL - 2.50 mg/mL	p__Firmicutes|c__Clostridia|o__Clostridiales|f__Lachnospiraceae|g__Herbinix|s__Herbinix luporum	-1.68519	2.68752	-0.536209	0.283117	0.200802	0.558101	0.228136	0.594424	0.594424		ALDEx2_t
0.40 mg/mL - 2.50 mg/mL	p__Firmicutes|c__Clostridia|o__Clostridiales|f__Lachnospiraceae|g__Faecalimonas|s__Faecalimonas umbilicata	-1.30946	3.48694	-0.336177	0.359375	0.269637	0.61463	0.422036	0.740171	0.740171		ALDEx2_t
0.40 mg/mL - 2.50 mg/mL	p__Firmicutes|c__Clostridia|o__Clostridiales|f__Lachnospiraceae|g__Lachnospira|s__Lachnospira eligens	2.99718	2.99914	0.979601	0.0961045	0.0200744	0.320418	0.0158487	0.245573	0.245573		ALDEx2_t
0.40 mg/mL - 2.50 mg/mL	p__Firmicutes|c__Clostridia|o__Clostridiales|f__Lachnospiraceae|g__Blautia|s__Blautia producta	-0.594669	3.84212	-0.153942	0.415584	0.417704	0.701017	0.652465	0.861353	0.861353		ALDEx2_t
0.40 mg/mL - 2.50 mg/mL	p__Firmicutes|c__Clostridia|o__Clostridiales|f__Lachnospiraceae|g__Blautia|s__Blautia sp. YL58	-1.43413	3.00273	-0.421552	0.301299	0.190147	0.560107	0.293493	0.643024	0.643024		ALDEx2_t
0.40 mg/mL - 2.50 mg/mL	p__Firmicutes|c__Clostridia|o__Clostridiales|f__Ruminococcaceae|g__|s__[Eubacterium] siraeum	-0.399701	4.36524	-0.0705162	0.472727	0.702944	0.85435	0.800085	0.926472	0.926472		ALDEx2_t
0.40 mg/mL - 2.50 mg/mL	p__Firmicutes|c__Bacilli|o__Lactobacillales|f__Lactobacillaceae|g__Lactobacillus|s__Lactobacillus johnsonii	3.16909	3.76388	0.755187	0.151042	0.118759	0.462096	0.0457875	0.331	0.331		ALDEx2_t
0.40 mg/mL - 2.50 mg/mL	p__Firmicutes|c__Clostridia|o__Clostridiales|f__Lachnospiraceae|g__Enterocloster|s__Enterocloster bolteae	-0.5514	2.25801	-0.185778	0.395833	0.454233	0.716357	0.515339	0.77644	0.77644		ALDEx2_t
0.40 mg/mL - 2.50 mg/mL	p__Bacteroidetes|c__Bacteroidia|o__Bacteroidales|f__Muribaculaceae|g__Duncaniella|s__Duncaniella sp. B8	-2.61636	5.10969	-0.438124	0.320313	0.299379	0.603732	0.323611	0.633482	0.633482		ALDEx2_t
0.40 mg/mL - 2.50 mg/mL	p__Firmicutes|c__Clostridia|o__Clostridiales|f__Christensenellaceae|g__Christensenella|s__Christensenella massiliensis	-0.43183	3.5191	-0.107442	0.446753	0.709114	0.861526	0.76242	0.920668	0.920668		ALDEx2_t
0.40 mg/mL - 2.50 mg/mL	p__Bacteroidetes|c__Bacteroidia|o__Bacteroidales|f__Rikenellaceae|g__Alistipes|s__Alistipes senegalensis	-1.49342	5.80812	-0.242486	0.382813	0.447348	0.708404	0.514548	0.761329	0.761329		ALDEx2_t
0.40 mg/mL - 2.50 mg/mL	p__Firmicutes|c__Erysipelotrichia|o__Erysipelotrichales|f__Erysipelotrichaceae|g__Breznakia|s__Breznakia pachnodae	3.63413	4.73168	0.684903	0.231771	0.13179	0.471745	0.137186	0.466064	0.466064		ALDEx2_t
0.40 mg/mL - 2.50 mg/mL	p__Firmicutes|c__Clostridia|o__Clostridiales|f__Hungateiclostridiaceae|g__Hungateiclostridium|s__Hungateiclostridium cellulolyticum	2.91883	5.00952	0.535137	0.265625	0.286824	0.602636	0.214712	0.573685	0.573685		ALDEx2_t
0.40 mg/mL - 2.50 mg/mL	p__Firmicutes|c__Clostridia|o__Clostridiales|f__Lachnospiraceae|g__Butyrivibrio|s__Butyrivibrio crossotus	-1.00871	2.63327	-0.310087	0.327273	0.261578	0.602311	0.359599	0.68727	0.68727		ALDEx2_t
0.40 mg/mL - 2.50 mg/mL	p__Firmicutes|c__Clostridia|o__Clostridiales|f__Lachnospiraceae|g__Eisenbergiella|s__Eisenbergiella tayi	-0.046351	4.0855	-0.0141609	0.493506	0.68226	0.846075	0.806956	0.932023	0.932023		ALDEx2_t
0.40 mg/mL - 2.50 mg/mL	p__Candidatus Melainabacteria|c__|o__Vampirovibrionales|f__|g__Vampirovibrio|s__Vampirovibrio chlorellavorus	-0.222855	5.84622	-0.022245	0.481771	0.566012	0.776979	0.63883	0.842994	0.842994		ALDEx2_t
0.40 mg/mL - 2.50 mg/mL	p__Firmicutes|c__Clostridia|o__Clostridiales|f__Lachnospiraceae|g__Lacrimispora|s__Lacrimispora indolis	-0.759801	2.79322	-0.195216	0.385417	0.487213	0.738467	0.516572	0.789542	0.789542		ALDEx2_t
0.40 mg/mL - 2.50 mg/mL	p__Bacteroidetes|c__Bacteroidia|o__Bacteroidales|f__Rikenellaceae|g__Alistipes|s__Alistipes finegoldii	-0.898305	5.79563	-0.148582	0.454545	0.561968	0.775883	0.600111	0.825514	0.825514		ALDEx2_t
0.40 mg/mL - 2.50 mg/mL	p__Firmicutes|c__Clostridia|o__Clostridiales|f__Ruminococcaceae|g__Pseudoflavonifractor|s__Pseudoflavonifractor phocaeensis	-1.29243	3.42274	-0.304864	0.354167	0.355666	0.657618	0.414492	0.711364	0.711364		ALDEx2_t
0.40 mg/mL - 2.50 mg/mL	p__Firmicutes|c__Clostridia|o__Clostridiales|f__Ruminococcaceae|g__Acetivibrio|s__Acetivibrio ethanolgignens	-0.14541	2.0357	-0.0431528	0.475325	0.645641	0.823194	0.676303	0.866936	0.866936		ALDEx2_t
0.40 mg/mL - 2.50 mg/mL	p__Firmicutes|c__Clostridia|o__Clostridiales|f__Lachnospiraceae|g__Anaerocolumna|s__Anaerocolumna cellulosilytica	-0.0419113	3.38203	-0.0137607	0.492188	0.653385	0.833465	0.766686	0.919775	0.919775		ALDEx2_t
0.40 mg/mL - 2.50 mg/mL	p__Firmicutes|c__Clostridia|o__Clostridiales|f__Catabacteriaceae|g__Catabacter|s__Catabacter hongkongensis	-0.263879	3.79297	-0.0570288	0.471354	0.635074	0.817634	0.719216	0.89121	0.89121		ALDEx2_t
0.40 mg/mL - 2.50 mg/mL	p__Firmicutes|c__Clostridia|o__Clostridiales|f__Oscillospiraceae|g__Oscillibacter|s__Oscillibacter sp. PEA192	-1.41797	3.22789	-0.393836	0.314286	0.286284	0.611961	0.290714	0.627265	0.627265		ALDEx2_t
0.40 mg/mL - 2.50 mg/mL	p__Firmicutes|c__Clostridia|o__Clostridiales|f__Lachnospiraceae|g__Faecalicatena|s__Faecalicatena orotica	-0.565011	3.21506	-0.139062	0.428571	0.491932	0.741524	0.620497	0.833407	0.833407		ALDEx2_t
0.40 mg/mL - 2.50 mg/mL	p__Firmicutes|c__Clostridia|o__Clostridiales|f__Lachnospiraceae|g__Lacrimispora|s__Lacrimispora celerecrescens	0.0508208	3.06391	0.0163934	0.492188	0.641449	0.824598	0.73687	0.90018	0.90018		ALDEx2_t
0.40 mg/mL - 2.50 mg/mL	p__Firmicutes|c__Clostridia|o__Clostridiales|f__Ruminococcaceae|g__Paludicola|s__Paludicola psychrotolerans	-2.0349	3.72806	-0.504443	0.267533	0.207463	0.546874	0.211216	0.526333	0.526333		ALDEx2_t
0.40 mg/mL - 2.50 mg/mL	p__Firmicutes|c__Bacilli|o__Lactobacillales|f__Lactobacillaceae|g__Lactobacillus|s__Lactobacillus animalis	-2.05941	5.37829	-0.3508	0.341146	0.424058	0.682682	0.438806	0.711007	0.711007		ALDEx2_t
0.40 mg/mL - 2.50 mg/mL	p__Firmicutes|c__Clostridia|o__Clostridiales|f__Lachnospiraceae|g__Parasporobacterium|s__Parasporobacterium paucivorans	-0.768659	4.62463	-0.171006	0.423377	0.5894	0.794022	0.690934	0.876577	0.876577		ALDEx2_t
0.40 mg/mL - 2.50 mg/mL	p__Firmicutes|c__Clostridia|o__Clostridiales|f__Lachnospiraceae|g__Lachnoclostridium|s__[Clostridium] polysaccharolyticum	-0.081515	3.66042	-0.0210415	0.480519	0.624126	0.816712	0.684966	0.877104	0.877104		ALDEx2_t
0.40 mg/mL - 2.50 mg/mL	p__Firmicutes|c__Clostridia|o__Clostridiales|f__Lachnospiraceae|g__Lachnoclostridium|s__[Clostridium] populeti	1.60511	2.15643	0.63724	0.166667	0.183145	0.487843	0.063884	0.344761	0.344761		ALDEx2_t
0.40 mg/mL - 2.50 mg/mL	p__Firmicutes|c__Clostridia|o__Clostridiales|f__Hungateiclostridiaceae|g__Anaerobacterium|s__Anaerobacterium chartisolvens	2.95112	3.67133	0.625743	0.247396	0.17853	0.519217	0.176553	0.509078	0.509078		ALDEx2_t
0.40 mg/mL - 2.50 mg/mL	p__Firmicutes|c__Clostridia|o__Clostridiales|f__Clostridiaceae|g__Geosporobacter|s__Geosporobacter ferrireducens	0.780584	3.95745	0.164342	0.423377	0.541299	0.771565	0.619264	0.848571	0.848571		ALDEx2_t
0.40 mg/mL - 2.50 mg/mL	p__Firmicutes|c__Clostridia|o__Clostridiales|f__Lachnospiraceae|g__Lacrimispora|s__Lacrimispora amygdalina	-0.204547	3.52566	-0.042388	0.460938	0.558797	0.776954	0.70864	0.885606	0.885606		ALDEx2_t
0.40 mg/mL - 2.50 mg/mL	p__Firmicutes|c__Clostridia|o__Clostridiales|f__Lachnospiraceae|g__Mediterraneibacter|s__[Ruminococcus] gnavus	0.385676	3.40798	0.088992	0.451948	0.652414	0.832361	0.712348	0.889889	0.889889		ALDEx2_t
0.40 mg/mL - 2.50 mg/mL	p__Firmicutes|c__Clostridia|o__Clostridiales|f__Lachnospiraceae|g__Robinsoniella|s__Robinsoniella peoriensis	-0.605264	3.56778	-0.156393	0.425974	0.510467	0.749588	0.604419	0.829164	0.829164		ALDEx2_t
0.40 mg/mL - 2.50 mg/mL	p__Bacteroidetes|c__Bacteroidia|o__Bacteroidales|f__Rikenellaceae|g__Alistipes|s__Alistipes communis	-0.967988	5.47594	-0.144302	0.431169	0.519199	0.74819	0.607502	0.827369	0.827369		ALDEx2_t
0.40 mg/mL - 2.50 mg/mL	p__Firmicutes|c__Clostridia|o__Clostridiales|f__Hungateiclostridiaceae|g__Ruminiclostridium|s__Ruminiclostridium cellobioparum	2.66016	4.21718	0.592107	0.216146	0.237106	0.563068	0.155787	0.50384	0.50384		ALDEx2_t
0.40 mg/mL - 2.50 mg/mL	p__Firmicutes|c__Clostridia|o__Clostridiales|f__Lachnospiraceae|g__Blautia|s__Blautia sp. SC05B48	0.0623872	3.26404	0.013143	0.484375	0.598594	0.799323	0.750695	0.907067	0.907067		ALDEx2_t
0.40 mg/mL - 2.50 mg/mL	p__Firmicutes|c__Clostridia|o__Clostridiales|f__Lachnospiraceae|g__Anaerostipes|s__Anaerostipes hadrus	-0.412378	3.23498	-0.105465	0.428571	0.508355	0.753998	0.591601	0.825916	0.825916		ALDEx2_t
0.40 mg/mL - 2.50 mg/mL	p__Firmicutes|c__Clostridia|o__Clostridiales|f__Clostridiaceae|g__Clostridium|s__Clostridium botulinum	2.74518	3.9929	0.607149	0.234375	0.211424	0.53868	0.152597	0.479415	0.479415		ALDEx2_t
0.40 mg/mL - 2.50 mg/mL	p__Firmicutes|c__Clostridia|o__Clostridiales|f__Lachnospiraceae|g__Roseburia|s__Roseburia intestinalis	-0.900264	3.92954	-0.167116	0.405195	0.482885	0.736174	0.546472	0.803165	0.803165		ALDEx2_t
0.40 mg/mL - 2.50 mg/mL	p__Bacteroidetes|c__Bacteroidia|o__Bacteroidales|f__Rikenellaceae|g__Alistipes|s__Alistipes dispar	-1.97728	5.1412	-0.346572	0.348052	0.436154	0.687514	0.479895	0.736541	0.736541		ALDEx2_t
0.40 mg/mL - 2.50 mg/mL	p__Firmicutes|c__Clostridia|o__Clostridiales|f__Lachnospiraceae|g__|s__Lachnospiraceae bacterium Choco86	-0.333978	4.31086	-0.058674	0.462338	0.656985	0.830535	0.735509	0.898927	0.898927		ALDEx2_t
0.40 mg/mL - 2.50 mg/mL	p__Firmicutes|c__Clostridia|o__Clostridiales|f__Clostridiaceae|g__Clostridium|s__Clostridium sp. SY8519	0.0447073	3.15622	0.0123173	0.493506	0.559045	0.782237	0.671602	0.863761	0.863761		ALDEx2_t
0.40 mg/mL - 2.50 mg/mL	p__Firmicutes|c__Bacilli|o__Lactobacillales|f__Lactobacillaceae|g__Lactobacillus|s__Lactobacillus rogosae	3.36138	3.68873	0.80369	0.15065	0.108389	0.406333	0.0511832	0.320627	0.320627		ALDEx2_t
0.40 mg/mL - 2.50 mg/mL	p__Firmicutes|c__Clostridia|o__Clostridiales|f__Clostridiaceae|g__Falcatimonas|s__Falcatimonas natans	0.908951	4.15635	0.177256	0.403646	0.493591	0.739354	0.578877	0.811943	0.811943		ALDEx2_t
0.40 mg/mL - 2.50 mg/mL	p__Bacteroidetes|c__Bacteroidia|o__Bacteroidales|f__Rikenellaceae|g__Alistipes|s__Alistipes onderdonkii	-0.551203	5.5714	-0.0801277	0.462338	0.551322	0.771925	0.622825	0.834796	0.834796		ALDEx2_t
0.40 mg/mL - 2.50 mg/mL	p__Firmicutes|c__Clostridia|o__Clostridiales|f__Clostridiaceae|g__Clostridium|s__Clostridium tarantellae	2.50753	4.72802	0.44605	0.307292	0.2497	0.57614	0.261119	0.602756	0.602756		ALDEx2_t
0.40 mg/mL - 2.50 mg/mL	p__Firmicutes|c__Clostridia|o__Clostridiales|f__Ruminococcaceae|g__Pseudoflavonifractor|s__Pseudoflavonifractor capillosus	-2.29858	3.73266	-0.561912	0.231771	0.230668	0.545593	0.16407	0.476417	0.476417		ALDEx2_t
0.40 mg/mL - 2.50 mg/mL	p__Firmicutes|c__Clostridia|o__Clostridiales|f__|g__Intestinimonas|s__Intestinimonas butyriciproducens	-2.47277	3.31981	-0.676271	0.187013	0.135319	0.458966	0.11828	0.395556	0.395556		ALDEx2_t
0.40 mg/mL - 2.50 mg/mL	p__Firmicutes|c__Clostridia|o__Clostridiales|f__Ruminococcaceae|g__Hydrogenoanaerobacterium|s__Hydrogenoanaerobacterium saccharovorans	-0.348648	4.23326	-0.0886774	0.450521	0.560774	0.773416	0.621883	0.835985	0.835985		ALDEx2_t
0.40 mg/mL - 2.50 mg/mL	p__Firmicutes|c__Clostridia|o__Clostridiales|f__Hungateiclostridiaceae|g__Ruminiclostridium|s__Ruminiclostridium cellulolyticum	2.41304	4.21476	0.535659	0.267533	0.205047	0.531483	0.194238	0.528376	0.528376		ALDEx2_t
0.40 mg/mL - 2.50 mg/mL	p__Bacteroidetes|c__Bacteroidia|o__Bacteroidales|f__Rikenellaceae|g__Alistipes|s__Alistipes putredinis	-0.836894	5.36127	-0.131948	0.4375	0.555523	0.774824	0.606313	0.823661	0.823661		ALDEx2_t
0.40 mg/mL - 2.50 mg/mL	p__Firmicutes|c__Clostridia|o__Clostridiales|f__Lachnospiraceae|g__Lacrimispora|s__Lacrimispora algidixylanolytica	1.94085	3.38024	0.493927	0.255209	0.299125	0.595612	0.249285	0.56641	0.56641		ALDEx2_t
0.40 mg/mL - 2.50 mg/mL	p__Firmicutes|c__Clostridia|o__Clostridiales|f__Ruminococcaceae|g__|s__[Clostridium] methylpentosum	-0.702987	3.49506	-0.158287	0.411458	0.537129	0.762253	0.586107	0.817457	0.817457		ALDEx2_t
0.40 mg/mL - 2.50 mg/mL	p__Firmicutes|c__Erysipelotrichia|o__Erysipelotrichales|f__Erysipelotrichaceae|g__Faecalitalea|s__Faecalitalea cylindroides	2.63999	4.59881	0.506128	0.277922	0.21172	0.538308	0.246163	0.558501	0.558501		ALDEx2_t
0.40 mg/mL - 2.50 mg/mL	p__Verrucomicrobia|c__Verrucomicrobiae|o__Verrucomicrobiales|f__Akkermansiaceae|g__Akkermansia|s__Akkermansia muciniphila	-0.975044	4.58305	-0.212916	0.411458	0.513424	0.747427	0.569818	0.808183	0.808183		ALDEx2_t
0.40 mg/mL - 2.50 mg/mL	p__Firmicutes|c__Clostridia|o__Clostridiales|f__Ruminococcaceae|g__Acutalibacter|s__Acutalibacter muris	-1.10295	3.85164	-0.229213	0.376623	0.43948	0.710099	0.47419	0.748043	0.748043		ALDEx2_t
0.40 mg/mL - 2.50 mg/mL	p__Firmicutes|c__Clostridia|o__Clostridiales|f__Ruminococcaceae|g__Negativibacillus|s__Negativibacillus massiliensis	-1.1654	3.30649	-0.331943	0.328125	0.381793	0.668343	0.392992	0.683922	0.683922		ALDEx2_t
0.40 mg/mL - 2.50 mg/mL	p__Firmicutes|c__Clostridia|o__Clostridiales|f__|g__Colidextribacter|s__Colidextribacter massiliensis	-0.310805	3.8904	-0.0731897	0.463542	0.56676	0.783412	0.654252	0.855195	0.855195		ALDEx2_t
0.40 mg/mL - 2.50 mg/mL	p__Firmicutes|c__Clostridia|o__Clostridiales|f__Lachnospiraceae|g__|s__Lachnospiraceae bacterium oral taxon 500	3.63338	4.10095	0.82608	0.161459	0.127783	0.427553	0.0759761	0.358926	0.358926		ALDEx2_t
0.40 mg/mL - 2.50 mg/mL	p__Firmicutes|c__Clostridia|o__Clostridiales|f__Hungateiclostridiaceae|g__Hungateiclostridium|s__Hungateiclostridium thermocellum	2.63582	4.20574	0.570071	0.264935	0.217462	0.53099	0.208229	0.527348	0.527348		ALDEx2_t
0.40 mg/mL - 2.50 mg/mL	p__Firmicutes|c__Clostridia|o__Clostridiales|f__Lachnospiraceae|g__Anaerotignum|s__Anaerotignum lactatifermentans	-1.51413	3.91949	-0.318743	0.346354	0.431561	0.698365	0.444053	0.722807	0.722807		ALDEx2_t
0.40 mg/mL - 2.50 mg/mL	p__Firmicutes|c__Clostridia|o__Clostridiales|f__Ruminococcaceae|g__Anaeromassilibacillus|s__Anaeromassilibacillus senegalensis	-0.437445	4.20055	-0.0931009	0.458333	0.571559	0.77938	0.618421	0.829641	0.829641		ALDEx2_t
0.40 mg/mL - 2.50 mg/mL	p__Firmicutes|c__Clostridia|o__Clostridiales|f__Clostridiaceae|g__Clostridium|s__Clostridium saudiense	-0.185131	4.30536	-0.0345768	0.484375	0.616914	0.810277	0.670501	0.867811	0.867811		ALDEx2_t
0.40 mg/mL - 2.50 mg/mL	p__Firmicutes|c__Clostridia|o__Clostridiales|f__Lachnospiraceae|g__Anaerostipes|s__Anaerostipes butyraticus	1.37691	2.6595	0.413999	0.304688	0.301258	0.598091	0.295324	0.611867	0.611867		ALDEx2_t
0.40 mg/mL - 2.50 mg/mL	p__Firmicutes|c__Clostridia|o__Clostridiales|f__Lachnospiraceae|g__Schaedlerella|s__Schaedlerella arabinosiphila	-1.89436	3.39157	-0.457313	0.277922	0.238172	0.556563	0.245806	0.55126	0.55126		ALDEx2_t
0.40 mg/mL - 2.50 mg/mL	p__Tenericutes|c__Mollicutes|o__Entomoplasmatales|f__Spiroplasmataceae|g__Spiroplasma|s__Spiroplasma lampyridicola	2.17592	4.92243	0.384391	0.327273	0.384316	0.663193	0.39677	0.683122	0.683122		ALDEx2_t
0.40 mg/mL - 2.50 mg/mL	p__Firmicutes|c__Clostridia|o__Clostridiales|f__Clostridiaceae|g__Hungatella|s__Hungatella xylanolytica	2.55029	4.52114	0.461511	0.291667	0.280988	0.583814	0.271028	0.578959	0.578959		ALDEx2_t
0.40 mg/mL - 2.50 mg/mL	p__Tenericutes|c__Mollicutes|o__Entomoplasmatales|f__Spiroplasmataceae|g__Spiroplasma|s__Spiroplasma chrysopicola	1.72557	5.02454	0.300579	0.366234	0.442025	0.696628	0.485538	0.749112	0.749112		ALDEx2_t
0.40 mg/mL - 2.50 mg/mL	p__Firmicutes|c__Clostridia|o__Clostridiales|f__Lachnospiraceae|g__Faecalicatena|s__Faecalicatena contorta	-1.93441	3.7823	-0.41417	0.28125	0.31075	0.611524	0.268807	0.578267	0.578267		ALDEx2_t
0.40 mg/mL - 2.50 mg/mL	p__Firmicutes|c__Clostridia|o__Clostridiales|f__Christensenellaceae|g__Christensenella|s__Christensenella timonensis	3.52833	3.60446	0.875294	0.145834	0.109336	0.392759	0.0601118	0.308401	0.308401		ALDEx2_t
0.40 mg/mL - 2.50 mg/mL	p__Firmicutes|c__Clostridia|o__Clostridiales|f__Hungateiclostridiaceae|g__Hungateiclostridium|s__Hungateiclostridium straminisolvens	2.49066	4.22816	0.511766	0.275325	0.265337	0.575443	0.218828	0.542978	0.542978		ALDEx2_t
0.40 mg/mL - 2.50 mg/mL	p__Bacteroidetes|c__Bacteroidia|o__Bacteroidales|f__Rikenellaceae|g__Alistipes|s__Alistipes megaguti	-0.645351	4.83549	-0.110033	0.447917	0.521754	0.750242	0.587254	0.813432	0.813432		ALDEx2_t
0.40 mg/mL - 2.50 mg/mL	p__Firmicutes|c__Clostridia|o__Clostridiales|f__Clostridiaceae|g__Clostridium|s__Clostridium disporicum	-1.57765	3.74894	-0.35334	0.317708	0.41312	0.680861	0.417471	0.687742	0.687742		ALDEx2_t
0.40 mg/mL - 2.50 mg/mL	p__Tenericutes|c__Mollicutes|o__Entomoplasmatales|f__Spiroplasmataceae|g__Spiroplasma|s__Spiroplasma syrphidicola	2.84149	4.54767	0.574227	0.238961	0.239097	0.555879	0.199956	0.520136	0.520136		ALDEx2_t
0.40 mg/mL - 2.50 mg/mL	p__Firmicutes|c__Clostridia|o__Clostridiales|f__Lachnospiraceae|g__Anaerostipes|s__Anaerostipes rhamnosivorans	-0.367176	3.345	-0.0966666	0.441558	0.591275	0.795913	0.646052	0.853982	0.853982		ALDEx2_t
0.40 mg/mL - 2.50 mg/mL	p__Firmicutes|c__Clostridia|o__Clostridiales|f__Lachnospiraceae|g__Anaerobutyricum|s__Anaerobutyricum hallii	-0.25848	4.41314	-0.0439997	0.472727	0.552911	0.768679	0.614274	0.82696	0.82696		ALDEx2_t
0.40 mg/mL - 2.50 mg/mL	p__Firmicutes|c__Clostridia|o__Clostridiales|f__Lachnospiraceae|g__Lachnoclostridium|s__[Clostridium] scindens	-0.886831	3.75695	-0.181507	0.375	0.502794	0.740426	0.50871	0.754512	0.754512		ALDEx2_t
0.40 mg/mL - 2.50 mg/mL	p__Firmicutes|c__Clostridia|o__Clostridiales|f__Lachnospiraceae|g__Anaerocolumna|s__Anaerocolumna xylanovorans	-0.983331	4.40357	-0.190819	0.412987	0.563697	0.777301	0.610374	0.825916	0.825916		ALDEx2_t
0.40 mg/mL - 2.50 mg/mL	p__Firmicutes|c__Clostridia|o__Clostridiales|f__Lachnospiraceae|g__Anaerotignum|s__Anaerotignum aminivorans	-0.560012	3.76824	-0.128416	0.416667	0.523659	0.760684	0.568265	0.802477	0.802477		ALDEx2_t
0.40 mg/mL - 2.50 mg/mL	p__Firmicutes|c__Clostridia|o__Clostridiales|f__Lachnospiraceae|g__Bariatricus|s__Bariatricus massiliensis	1.16379	3.94988	0.241632	0.361039	0.422333	0.68258	0.444878	0.718143	0.718143		ALDEx2_t
0.40 mg/mL - 2.50 mg/mL	p__Firmicutes|c__Clostridia|o__Clostridiales|f__Eubacteriaceae|g__Eubacterium|s__Eubacterium oxidoreducens	-1.38856	3.76454	-0.286003	0.345455	0.460346	0.689659	0.413399	0.684031	0.684031		ALDEx2_t
0.40 mg/mL - 2.50 mg/mL	p__Firmicutes|c__Clostridia|o__Clostridiales|f__Lachnospiraceae|g__Lachnoclostridium|s__Lachnoclostridium pacaense	0.994676	3.70504	0.206532	0.393229	0.464952	0.706291	0.501686	0.746197	0.746197		ALDEx2_t
0.40 mg/mL - 2.50 mg/mL	p__Firmicutes|c__Clostridia|o__Clostridiales|f__Lachnospiraceae|g__Marvinbryantia|s__Marvinbryantia formatexigens	-1.086	3.92542	-0.219877	0.366234	0.442228	0.696872	0.443853	0.710342	0.710342		ALDEx2_t
0.40 mg/mL - 2.50 mg/mL	p__Firmicutes|c__Clostridia|o__Clostridiales|f__Ruminococcaceae|g__Ruminococcus|s__Ruminococcus bicirculans	0.0571583	4.29635	0.0119435	0.492188	0.561391	0.773136	0.625362	0.844773	0.844773		ALDEx2_t
0.40 mg/mL - 2.50 mg/mL	p__Firmicutes|c__Clostridia|o__Clostridiales|f__|g__Ihubacter|s__Ihubacter massiliensis	-0.570873	3.73373	-0.11894	0.446753	0.530388	0.762687	0.600368	0.824471	0.824471		ALDEx2_t
0.40 mg/mL - 2.50 mg/mL	p__Firmicutes|c__Clostridia|o__Clostridiales|f__Lachnospiraceae|g__Blautia|s__Blautia sp. N6H1-15	0.727553	4.10923	0.15565	0.419271	0.488682	0.729682	0.533035	0.776403	0.776403		ALDEx2_t
0.40 mg/mL - 2.50 mg/mL	p__Firmicutes|c__Clostridia|o__Clostridiales|f__Ruminococcaceae|g__|s__[Clostridium] viride	-1.10402	3.77536	-0.256846	0.348958	0.418748	0.682818	0.419011	0.697999	0.697999		ALDEx2_t
0.40 mg/mL - 2.50 mg/mL	p__Firmicutes|c__Clostridia|o__Clostridiales|f__Clostridiaceae|g__Clostridium|s__Clostridium subterminale	2.14609	4.12469	0.465923	0.265625	0.254066	0.546782	0.227059	0.538419	0.538419		ALDEx2_t
0.40 mg/mL - 2.50 mg/mL	p__Firmicutes|c__Clostridia|o__Clostridiales|f__Hungateiclostridiaceae|g__|s__Hungateiclostridiaceae bacterium KB18	-0.558277	4.32664	-0.129854	0.455729	0.553725	0.768648	0.582488	0.81284	0.81284		ALDEx2_t
0.40 mg/mL - 2.50 mg/mL	p__Firmicutes|c__Clostridia|o__Clostridiales|f__Lachnospiraceae|g__Faecalicatena|s__Faecalicatena fissicatena	0.087964	3.94906	0.0180232	0.492188	0.555388	0.772587	0.611852	0.834109	0.834109		ALDEx2_t
0.40 mg/mL - 2.50 mg/mL	p__Firmicutes|c__Clostridia|o__Clostridiales|f__Clostridiaceae|g__Clostridium|s__Clostridium merdae	0.0250794	4.64507	0.00252053	0.496104	0.531293	0.751499	0.591318	0.810322	0.810322		ALDEx2_t
0.40 mg/mL - 2.50 mg/mL	p__Firmicutes|c__Clostridia|o__Clostridiales|f__Lachnospiraceae|g__Roseburia|s__Roseburia hominis	0.0248873	3.81632	0.00612606	0.496104	0.48374	0.729387	0.532577	0.77235	0.77235		ALDEx2_t
0.40 mg/mL - 2.50 mg/mL	p__Firmicutes|c__Clostridia|o__Clostridiales|f__Ruminococcaceae|g__Harryflintia|s__Harryflintia acetispora	-0.585671	4.08199	-0.114209	0.431169	0.496063	0.740493	0.551074	0.792498	0.792498		ALDEx2_t
0.40 mg/mL - 2.50 mg/mL	p__Firmicutes|c__Clostridia|o__Clostridiales|f__|g__Monoglobus|s__Monoglobus pectinilyticus	1.19885	4.22007	0.252605	0.354167	0.469024	0.70569	0.474879	0.729299	0.729299		ALDEx2_t
0.40 mg/mL - 2.50 mg/mL	p__Firmicutes|c__Clostridia|o__Clostridiales|f__Peptococcaceae|g__Dehalobacterium|s__Dehalobacterium formicoaceticum	0.493507	4.07438	0.079827	0.463542	0.529724	0.75181	0.580146	0.808524	0.808524		ALDEx2_t
0.40 mg/mL - 2.50 mg/mL	p__Firmicutes|c__Clostridia|o__Clostridiales|f__Peptococcaceae|g__|s__Peptococcaceae bacterium DCMF	1.31394	4.39382	0.251131	0.371429	0.417666	0.682958	0.44129	0.719043	0.719043		ALDEx2_t
0.40 mg/mL - 2.50 mg/mL	p__Firmicutes|c__Clostridia|o__Clostridiales|f__Peptostreptococcaceae|g__Romboutsia|s__Romboutsia timonensis	-0.491668	4.08235	-0.111153	0.453125	0.495658	0.73645	0.549692	0.786006	0.786006		ALDEx2_t
0.40 mg/mL - 2.50 mg/mL	p__Firmicutes|c__Clostridia|o__Clostridiales|f__Ruminococcaceae|g__Tepidibaculum|s__Tepidibaculum saccharolyticum	1.59184	4.32011	0.300813	0.332468	0.411089	0.66637	0.425874	0.685622	0.685622		ALDEx2_t
0.40 mg/mL - 2.50 mg/mL	p__Firmicutes|c__Clostridia|o__Clostridiales|f__Hungateiclostridiaceae|g__Hungateiclostridium|s__Hungateiclostridium clariflavum	1.03044	4.02801	0.220028	0.395833	0.472321	0.717127	0.510705	0.753544	0.753544		ALDEx2_t
0.40 mg/mL - 2.50 mg/mL	p__Firmicutes|c__Clostridia|o__Clostridiales|f__Ruminococcaceae|g__Ruminococcus|s__Ruminococcus champanellensis	0.346076	4.30987	0.0784745	0.45974	0.564132	0.782555	0.650027	0.848794	0.848794		ALDEx2_t
0.40 mg/mL - 2.50 mg/mL	p__Firmicutes|c__Clostridia|o__Clostridiales|f__|g__Massilistercora|s__Massilistercora timonensis	-0.719115	4.17353	-0.145575	0.427083	0.459299	0.707817	0.490398	0.750322	0.750322		ALDEx2_t
0.40 mg/mL - 2.50 mg/mL	p__Firmicutes|c__Clostridia|o__Clostridiales|f__Peptostreptococcaceae|g__Clostridioides|s__Clostridioides difficile	1.90052	4.47722	0.326121	0.325521	0.33812	0.623537	0.350322	0.640595	0.640595		ALDEx2_t
0.40 mg/mL - 2.50 mg/mL	p__Firmicutes|c__Clostridia|o__Clostridiales|f__|g__|s__Clostridiales bacterium CCNA10	-0.207002	4.3988	-0.0335907	0.481771	0.515442	0.749057	0.560073	0.793442	0.793442		ALDEx2_t
0.40 mg/mL - 2.50 mg/mL	p__Firmicutes|c__Clostridia|o__Clostridiales|f__Ruminococcaceae|g__Faecalibacterium|s__Faecalibacterium prausnitzii	1.40902	3.90978	0.314906	0.348958	0.382978	0.64384	0.396598	0.665532	0.665532		ALDEx2_t
0.40 mg/mL - 2.50 mg/mL	p__Firmicutes|c__Clostridia|o__Clostridiales|f__Ruminococcaceae|g__Papillibacter|s__Papillibacter cinnamivorans	0.818722	4.05581	0.171824	0.385417	0.467447	0.706535	0.468677	0.729164	0.729164		ALDEx2_t
0.40 mg/mL - 2.50 mg/mL	p__Firmicutes|c__Clostridia|o__Clostridiales|f__Clostridiaceae|g__Clostridium|s__Clostridium beijerinckii	1.97776	4.17301	0.399197	0.303896	0.340658	0.614706	0.352697	0.626294	0.626294		ALDEx2_t
0.40 mg/mL - 2.50 mg/mL	p__Firmicutes|c__Erysipelotrichia|o__Erysipelotrichales|f__Erysipelotrichaceae|g__Turicibacter|s__Turicibacter sp. H121	0.162898	4.11941	0.0403185	0.484375	0.471377	0.727578	0.536544	0.785648	0.785648		ALDEx2_t
0.40 mg/mL - 2.50 mg/mL	p__Firmicutes|c__Clostridia|o__Clostridiales|f__Ruminococcaceae|g__Caproiciproducens|s__Caproiciproducens galactitolivorans	-0.0236412	4.41722	-0.00364221	0.493506	0.482272	0.724503	0.540043	0.790951	0.790951		ALDEx2_t
0.40 mg/mL - 2.50 mg/mL	p__Firmicutes|c__Clostridia|o__Clostridiales|f__Clostridiaceae|g__Butyricicoccus|s__Butyricicoccus pullicaecorum	1.76246	4.36942	0.357409	0.335938	0.358899	0.63023	0.387899	0.662334	0.662334		ALDEx2_t
0.40 mg/mL - 2.50 mg/mL	p__Firmicutes|c__Clostridia|o__Clostridiales|f__Clostridiaceae|g__Clostridium|s__Clostridium sp. JN-9	1.62227	4.21027	0.325655	0.328125	0.35761	0.630279	0.365007	0.641151	0.641151		ALDEx2_t
0.40 mg/mL - 2.50 mg/mL	p__Firmicutes|c__Clostridia|o__Clostridiales|f__Clostridiaceae|g__Clostridium|s__Clostridium ventriculi	1.08859	4.30111	0.235985	0.385417	0.444658	0.694413	0.46945	0.719322	0.719322		ALDEx2_t
0.40 mg/mL - 6.60 mg/mL	p__Firmicutes|c__Clostridia|o__Clostridiales|f__Eubacteriaceae|g__Eubacterium|s__Eubacterium ventriosum	-3.92527	2.63033	-1.35958	0.0701308	0.00768709	0.0820084	0.00207061	0.0222888	0.0222888	*	ALDEx2_t
0.40 mg/mL - 6.60 mg/mL	p__Firmicutes|c__Clostridia|o__Clostridiales|f__Christensenellaceae|g__Christensenella|s__Christensenella minuta	-2.25807	1.73233	-1.23544	0.0729176	0.00345239	0.046619	0.00364307	0.0269331	0.0269331	*	ALDEx2_t
0.40 mg/mL - 6.60 mg/mL	p__Firmicutes|c__Clostridia|o__Clostridiales|f__Hungateiclostridiaceae|g__Hungateiclostridium|s__Hungateiclostridium alkalicellulosi	-4.45803	3.50243	-1.23403	0.0494805	0.00405648	0.0528992	0.00115005	0.0146072	0.0146072	*	ALDEx2_t
0.40 mg/mL - 6.60 mg/mL	p__Firmicutes|c__Clostridia|o__Clostridiales|f__|g__Intestinimonas|s__Intestinimonas butyriciproducens	3.23595	3.0267	1.00479	0.0987019	0.0379372	0.175784	0.0112955	0.0490361	0.0490361	*	ALDEx2_t
0.40 mg/mL - 6.60 mg/mL	p__Firmicutes|c__Bacilli|o__Lactobacillales|f__Lactobacillaceae|g__Lactobacillus|s__Lactobacillus rogosae	-4.45079	3.76165	-1.08562	0.106494	0.0282215	0.111743	0.00800542	0.0468045	0.0468045	*	ALDEx2_t
0.40 mg/mL - 6.60 mg/mL	p__Bacteroidetes|c__Bacteroidia|o__Bacteroidales|f__Muribaculaceae|g__Muribaculum|s__Muribaculum intestinale	5.20035	3.02106	1.64092	0.0104234	0.00746098	0.074619	0.000166144	0.00476029	0.00476029	**	ALDEx2_t
0.40 mg/mL - 6.60 mg/mL	p__Firmicutes|c__Clostridia|o__Clostridiales|f__Eubacteriaceae|g__Eubacterium|s__Eubacterium xylanophilum	-3.58067	2.78174	-1.28238	0.0181856	0.000315875	0.011926	0.000193786	0.00483944	0.00483944	**	ALDEx2_t
0.40 mg/mL - 6.60 mg/mL	p__Firmicutes|c__Clostridia|o__Clostridiales|f__Lachnospiraceae|g__Lachnospira|s__Lachnospira eligens	-5.26104	3.06054	-1.65187	0.0233796	0.000541768	0.0146484	0.00044401	0.0079148	0.0079148	**	ALDEx2_t
0.40 mg/mL - 6.60 mg/mL	p__Firmicutes|c__Clostridia|o__Clostridiales|f__Lachnospiraceae|g__|s__Lachnospiraceae bacterium GAM79	-1.40099	3.65697	-0.342224	0.353247	0.778805	0.872412	0.330771	0.563944	0.563944		ALDEx2_t
0.40 mg/mL - 6.60 mg/mL	p__Firmicutes|c__Clostridia|o__Clostridiales|f__Lachnospiraceae|g__Lacrimispora|s__Lacrimispora saccharolytica	-1.0609	2.88909	-0.354364	0.355844	0.631882	0.778338	0.36811	0.592072	0.592072		ALDEx2_t
0.40 mg/mL - 6.60 mg/mL	p__Firmicutes|c__Clostridia|o__Clostridiales|f__Lachnospiraceae|g__Eisenbergiella|s__Eisenbergiella massiliensis	-0.394476	2.15937	-0.107567	0.4375	0.503051	0.696747	0.679549	0.812481	0.812481		ALDEx2_t
0.40 mg/mL - 6.60 mg/mL	p__Firmicutes|c__Clostridia|o__Clostridiales|f__Oscillospiraceae|g__Dysosmobacter|s__Dysosmobacter welbionis	3.00125	2.90656	0.941392	0.109376	0.0459149	0.205952	0.00881483	0.0570521	0.0570521		ALDEx2_t
0.40 mg/mL - 6.60 mg/mL	p__Firmicutes|c__Clostridia|o__Clostridiales|f__Clostridiaceae|g__Clostridium|s__Clostridium sp. BNL1100	-3.19155	3.12151	-0.996168	0.11198	0.0324415	0.179169	0.00861932	0.0540244	0.0540244		ALDEx2_t
0.40 mg/mL - 6.60 mg/mL	p__Firmicutes|c__Clostridia|o__Clostridiales|f__|g__Flintibacter|s__Flintibacter sp. KGMB00164	1.65635	1.64787	0.942193	0.145834	0.0416605	0.189442	0.0165067	0.075988	0.075988		ALDEx2_t
0.40 mg/mL - 6.60 mg/mL	p__Firmicutes|c__Clostridia|o__Clostridiales|f__Lachnospiraceae|g__Anaerotaenia|s__Anaerotaenia torta	1.01188	2.30401	0.362099	0.320313	0.208874	0.453815	0.205926	0.414046	0.414046		ALDEx2_t
0.40 mg/mL - 6.60 mg/mL	p__Firmicutes|c__Clostridia|o__Clostridiales|f__Oscillospiraceae|g__Oscillibacter|s__Oscillibacter valericigenes	3.12238	3.03342	0.952764	0.129871	0.0450472	0.208068	0.00944486	0.0574804	0.0574804		ALDEx2_t
0.40 mg/mL - 6.60 mg/mL	p__Verrucomicrobia|c__Verrucomicrobiae|o__Verrucomicrobiales|f__Akkermansiaceae|g__Akkermansia|s__Akkermansia muciniphila	4.10561	5.06217	0.72698	0.238961	0.0999228	0.259565	0.0853472	0.21848	0.21848		ALDEx2_t
0.40 mg/mL - 6.60 mg/mL	p__Firmicutes|c__Clostridia|o__Clostridiales|f__Lachnospiraceae|g__Lachnoclostridium|s__Lachnoclostridium phytofermentans	2.21781	2.48435	0.798844	0.14323	0.0639488	0.241611	0.0128498	0.0703345	0.0703345		ALDEx2_t
0.40 mg/mL - 6.60 mg/mL	p__Firmicutes|c__Clostridia|o__Clostridiales|f__Eubacteriaceae|g__Eubacterium|s__Eubacterium coprostanoligenes	-2.83341	3.44545	-0.768631	0.220779	0.0881054	0.285027	0.0869064	0.233702	0.233702		ALDEx2_t
0.40 mg/mL - 6.60 mg/mL	p__Firmicutes|c__Clostridia|o__Clostridiales|f__Clostridiaceae|g__Hungatella|s__Hungatella hathewayi	0.296894	1.62097	0.134203	0.440104	0.454052	0.656953	0.695247	0.820164	0.820164		ALDEx2_t
0.40 mg/mL - 6.60 mg/mL	p__Firmicutes|c__Clostridia|o__Clostridiales|f__Ruminococcaceae|g__Anaerotruncus|s__Anaerotruncus rubiinfantis	2.13932	2.52153	0.665653	0.174026	0.112429	0.319715	0.0247263	0.103874	0.103874		ALDEx2_t
0.40 mg/mL - 6.60 mg/mL	p__Firmicutes|c__Clostridia|o__Clostridiales|f__Ruminococcaceae|g__Flavonifractor|s__Flavonifractor plautii	2.08085	3.27987	0.543512	0.215585	0.0980452	0.308535	0.0632037	0.195239	0.195239		ALDEx2_t
0.40 mg/mL - 6.60 mg/mL	p__Firmicutes|c__Clostridia|o__Clostridiales|f__Lachnospiraceae|g__Kineothrix|s__Kineothrix alysoides	0.825253	3.71793	0.242664	0.421875	0.234421	0.481754	0.646864	0.791391	0.791391		ALDEx2_t
0.40 mg/mL - 6.60 mg/mL	p__Firmicutes|c__Clostridia|o__Clostridiales|f__Lachnospiraceae|g__Lacrimispora|s__Lacrimispora sphenoides	-0.367067	3.00558	-0.122641	0.444156	0.714201	0.83168	0.729532	0.846822	0.846822		ALDEx2_t
0.40 mg/mL - 6.60 mg/mL	p__Firmicutes|c__Clostridia|o__Clostridiales|f__Lachnospiraceae|g__Acetatifactor|s__Acetatifactor muris	1.83385	3.2343	0.466712	0.283117	0.216174	0.456964	0.191059	0.390435	0.390435		ALDEx2_t
0.40 mg/mL - 6.60 mg/mL	p__Firmicutes|c__Clostridia|o__Clostridiales|f__Lachnospiraceae|g__Herbinix|s__Herbinix luporum	2.17394	2.3395	0.77717	0.210938	0.078953	0.278882	0.0521176	0.171597	0.171597		ALDEx2_t
0.40 mg/mL - 6.60 mg/mL	p__Firmicutes|c__Clostridia|o__Clostridiales|f__Ruminococcaceae|g__Phocea|s__Phocea massiliensis	0.841709	3.38843	0.19716	0.38961	0.307208	0.536809	0.463768	0.655072	0.655072		ALDEx2_t
0.40 mg/mL - 6.60 mg/mL	p__Firmicutes|c__Clostridia|o__Clostridiales|f__Christensenellaceae|g__Christensenella|s__Christensenella massiliensis	1.16856	2.79213	0.322755	0.32987	0.246095	0.488821	0.284139	0.497399	0.497399		ALDEx2_t
0.40 mg/mL - 6.60 mg/mL	p__Firmicutes|c__Clostridia|o__Clostridiales|f__Lachnospiraceae|g__Faecalimonas|s__Faecalimonas umbilicata	1.05564	3.23302	0.267782	0.371429	0.251259	0.492129	0.382922	0.585782	0.585782		ALDEx2_t
0.40 mg/mL - 6.60 mg/mL	p__Firmicutes|c__Clostridia|o__Clostridiales|f__Lachnospiraceae|g__Lachnoclostridium|s__Lachnoclostridium sp. YL32	0.498035	2.32285	0.147229	0.431169	0.366247	0.586618	0.601009	0.753145	0.753145		ALDEx2_t
0.40 mg/mL - 6.60 mg/mL	p__Firmicutes|c__Clostridia|o__Clostridiales|f__Lachnospiraceae|g__Enterocloster|s__Enterocloster bolteae	0.582445	1.77694	0.245653	0.368831	0.392695	0.602658	0.368349	0.560569	0.560569		ALDEx2_t
0.40 mg/mL - 6.60 mg/mL	p__Firmicutes|c__Clostridia|o__Clostridiales|f__Ruminococcaceae|g__Pseudoflavonifractor|s__Pseudoflavonifractor phocaeensis	1.76443	3.65652	0.42049	0.285714	0.266969	0.484001	0.199113	0.391669	0.391669		ALDEx2_t
0.40 mg/mL - 6.60 mg/mL	p__Firmicutes|c__Bacilli|o__Lactobacillales|f__Lactobacillaceae|g__Lactobacillus|s__Lactobacillus johnsonii	-3.15516	3.69683	-0.761142	0.15065	0.121515	0.275645	0.0169406	0.0841206	0.0841206		ALDEx2_t
0.40 mg/mL - 6.60 mg/mL	p__Firmicutes|c__Clostridia|o__Clostridiales|f__Hungateiclostridiaceae|g__Pseudoclostridium|s__Pseudoclostridium thermosuccinogenes	-3.82544	4.3812	-0.776336	0.174479	0.0850094	0.247606	0.0377708	0.131464	0.131464		ALDEx2_t
0.40 mg/mL - 6.60 mg/mL	p__Firmicutes|c__Clostridia|o__Clostridiales|f__Lachnospiraceae|g__Butyrivibrio|s__Butyrivibrio crossotus	0.81651	2.28664	0.266043	0.345455	0.305722	0.531596	0.395211	0.578783	0.578783		ALDEx2_t
0.40 mg/mL - 6.60 mg/mL	p__Firmicutes|c__Clostridia|o__Clostridiales|f__Hungateiclostridiaceae|g__Hungateiclostridium|s__Hungateiclostridium aldrichii	-3.74513	5.13888	-0.638471	0.272727	0.174417	0.378587	0.140655	0.313629	0.313629		ALDEx2_t
0.40 mg/mL - 6.60 mg/mL	p__Firmicutes|c__Clostridia|o__Clostridiales|f__Oscillospiraceae|g__Oscillibacter|s__Oscillibacter sp. PEA192	1.88563	2.67071	0.614337	0.179221	0.100835	0.297714	0.0670259	0.171825	0.171825		ALDEx2_t
0.40 mg/mL - 6.60 mg/mL	p__Firmicutes|c__Clostridia|o__Clostridiales|f__Lachnospiraceae|g__Blautia|s__Blautia producta	0.0295297	3.30759	0.00978206	0.496104	0.554325	0.72549	0.76657	0.871257	0.871257		ALDEx2_t
0.40 mg/mL - 6.60 mg/mL	p__Firmicutes|c__Clostridia|o__Clostridiales|f__Hungateiclostridiaceae|g__Hungateiclostridium|s__Hungateiclostridium saccincola	-4.6536	4.56048	-0.958447	0.148052	0.0558581	0.186967	0.0199335	0.0832451	0.0832451		ALDEx2_t
0.40 mg/mL - 6.60 mg/mL	p__Firmicutes|c__Clostridia|o__Clostridiales|f__Catabacteriaceae|g__Catabacter|s__Catabacter hongkongensis	1.14558	3.29793	0.300644	0.361039	0.4946	0.676244	0.448906	0.634169	0.634169		ALDEx2_t
0.40 mg/mL - 6.60 mg/mL	p__Firmicutes|c__Clostridia|o__Clostridiales|f__Lachnospiraceae|g__Anaerotignum|s__Anaerotignum lactatifermentans	3.41095	3.2983	0.885491	0.116884	0.0415523	0.185086	0.0134208	0.0632064	0.0632064		ALDEx2_t
0.40 mg/mL - 6.60 mg/mL	p__Firmicutes|c__Clostridia|o__Clostridiales|f__Lachnospiraceae|g__Faecalicatena|s__Faecalicatena orotica	1.24263	2.79703	0.363864	0.301299	0.236436	0.467797	0.251744	0.434086	0.434086		ALDEx2_t
0.40 mg/mL - 6.60 mg/mL	p__Firmicutes|c__Clostridia|o__Clostridiales|f__Lachnospiraceae|g__Anaerocolumna|s__Anaerocolumna cellulosilytica	0.590522	2.32832	0.18105	0.414063	0.383731	0.595932	0.524162	0.687048	0.687048		ALDEx2_t
0.40 mg/mL - 6.60 mg/mL	p__Firmicutes|c__Clostridia|o__Clostridiales|f__Ruminococcaceae|g__|s__[Eubacterium] siraeum	-0.759596	3.67721	-0.166482	0.402597	0.641574	0.773755	0.618703	0.760915	0.760915		ALDEx2_t
0.40 mg/mL - 6.60 mg/mL	p__Firmicutes|c__Clostridia|o__Clostridiales|f__Lachnospiraceae|g__Blautia|s__Blautia sp. YL58	-0.443455	4.13276	-0.0920107	0.444156	0.646969	0.78233	0.738191	0.851976	0.851976		ALDEx2_t
0.40 mg/mL - 6.60 mg/mL	p__Firmicutes|c__Clostridia|o__Clostridiales|f__Clostridiaceae|g__Clostridium|s__Clostridium botulinum	-0.755989	3.62249	-0.176071	0.38961	0.603044	0.74684	0.473651	0.659615	0.659615		ALDEx2_t
0.40 mg/mL - 6.60 mg/mL	p__Firmicutes|c__Clostridia|o__Clostridiales|f__Lachnospiraceae|g__Robinsoniella|s__Robinsoniella peoriensis	0.774539	3.68616	0.165113	0.418182	0.56335	0.728149	0.593636	0.746789	0.746789		ALDEx2_t
0.40 mg/mL - 6.60 mg/mL	p__Firmicutes|c__Clostridia|o__Clostridiales|f__Peptostreptococcaceae|g__Clostridioides|s__Clostridioides difficile	1.98541	3.74144	0.441498	0.273438	0.220639	0.438845	0.146426	0.316009	0.316009		ALDEx2_t
0.40 mg/mL - 6.60 mg/mL	p__Firmicutes|c__Clostridia|o__Clostridiales|f__Clostridiaceae|g__Geosporobacter|s__Geosporobacter ferrireducens	-0.582143	3.69828	-0.117514	0.431169	0.482896	0.655507	0.629096	0.776288	0.776288		ALDEx2_t
0.40 mg/mL - 6.60 mg/mL	p__Firmicutes|c__Clostridia|o__Clostridiales|f__Lachnospiraceae|g__Eisenbergiella|s__Eisenbergiella tayi	-0.407591	3.16939	-0.0856779	0.455729	0.6178	0.767117	0.706821	0.823537	0.823537		ALDEx2_t
0.40 mg/mL - 6.60 mg/mL	p__Firmicutes|c__Clostridia|o__Clostridiales|f__Clostridiaceae|g__Clostridium|s__Clostridium sp. SY8519	0.762171	2.97535	0.227053	0.376623	0.446389	0.636731	0.426069	0.605697	0.605697		ALDEx2_t
0.40 mg/mL - 6.60 mg/mL	p__Firmicutes|c__Clostridia|o__Clostridiales|f__Ruminococcaceae|g__Ruminococcus|s__Ruminococcus champanellensis	1.12042	5.08364	0.187531	0.403646	0.493536	0.663173	0.564315	0.711275	0.711275		ALDEx2_t
0.40 mg/mL - 6.60 mg/mL	p__Firmicutes|c__Clostridia|o__Clostridiales|f__Ruminococcaceae|g__Paludicola|s__Paludicola psychrotolerans	2.0691	3.35272	0.537385	0.234375	0.176803	0.380769	0.10638	0.24553	0.24553		ALDEx2_t
0.40 mg/mL - 6.60 mg/mL	p__Firmicutes|c__Clostridia|o__Clostridiales|f__Lachnospiraceae|g__Mediterraneibacter|s__[Ruminococcus] gnavus	-0.129851	3.07438	-0.0377002	0.483117	0.609833	0.755245	0.719666	0.829384	0.829384		ALDEx2_t
0.40 mg/mL - 6.60 mg/mL	p__Firmicutes|c__Clostridia|o__Clostridiales|f__Lachnospiraceae|g__Lachnoclostridium|s__[Clostridium] polysaccharolyticum	0.2448	3.01339	0.0742929	0.457143	0.482611	0.667798	0.642988	0.784832	0.784832		ALDEx2_t
0.40 mg/mL - 6.60 mg/mL	p__Firmicutes|c__Clostridia|o__Clostridiales|f__Lachnospiraceae|g__Anaerotignum|s__Anaerotignum aminivorans	2.18307	3.26587	0.602678	0.208334	0.117728	0.305682	0.0921755	0.205518	0.205518		ALDEx2_t
0.40 mg/mL - 6.60 mg/mL	p__Firmicutes|c__Erysipelotrichia|o__Erysipelotrichales|f__Erysipelotrichaceae|g__Breznakia|s__Breznakia pachnodae	-5.52307	4.87045	-1.07589	0.117188	0.0472921	0.163158	0.017623	0.0733954	0.0733954		ALDEx2_t
0.40 mg/mL - 6.60 mg/mL	p__Firmicutes|c__Clostridia|o__Clostridiales|f__Christensenellaceae|g__Christensenella|s__Christensenella timonensis	-0.421843	2.72994	-0.12407	0.416667	0.594373	0.738062	0.612723	0.755799	0.755799		ALDEx2_t
0.40 mg/mL - 6.60 mg/mL	p__Firmicutes|c__Clostridia|o__Clostridiales|f__Hungateiclostridiaceae|g__Hungateiclostridium|s__Hungateiclostridium cellulolyticum	-4.19637	4.83481	-0.77921	0.21875	0.136227	0.304987	0.0705682	0.196619	0.196619		ALDEx2_t
0.40 mg/mL - 6.60 mg/mL	p__Firmicutes|c__Clostridia|o__Clostridiales|f__Lachnospiraceae|g__Lacrimispora|s__Lacrimispora indolis	0.022033	2.44606	0.0123919	0.490909	0.590395	0.747954	0.636289	0.766447	0.766447		ALDEx2_t
0.40 mg/mL - 6.60 mg/mL	p__Firmicutes|c__Clostridia|o__Clostridiales|f__Ruminococcaceae|g__Pseudoflavonifractor|s__Pseudoflavonifractor capillosus	2.48387	3.34747	0.669821	0.216146	0.135232	0.327252	0.087256	0.213889	0.213889		ALDEx2_t
0.40 mg/mL - 6.60 mg/mL	p__Firmicutes|c__Clostridia|o__Clostridiales|f__Lachnospiraceae|g__Anaerostipes|s__Anaerostipes hadrus	0.44563	2.95717	0.136445	0.427083	0.568398	0.72673	0.564343	0.718805	0.718805		ALDEx2_t
0.40 mg/mL - 6.60 mg/mL	p__Firmicutes|c__Clostridia|o__Clostridiales|f__Lachnospiraceae|g__Lacrimispora|s__Lacrimispora amygdalina	-0.132994	3.06943	-0.0317524	0.483117	0.624237	0.76362	0.682477	0.807662	0.807662		ALDEx2_t
0.40 mg/mL - 6.60 mg/mL	p__Firmicutes|c__Clostridia|o__Clostridiales|f__Lachnospiraceae|g__Lachnoclostridium|s__Lachnoclostridium pacaense	1.28176	3.38843	0.329883	0.32987	0.298869	0.515555	0.253684	0.436167	0.436167		ALDEx2_t
0.40 mg/mL - 6.60 mg/mL	p__Firmicutes|c__Clostridia|o__Clostridiales|f__Lachnospiraceae|g__|s__Lachnospiraceae bacterium Choco86	1.00295	2.74335	0.321168	0.34375	0.396113	0.58952	0.358143	0.525717	0.525717		ALDEx2_t
0.40 mg/mL - 6.60 mg/mL	p__Firmicutes|c__Clostridia|o__Clostridiales|f__Lachnospiraceae|g__Roseburia|s__Roseburia intestinalis	0.809457	3.6442	0.188904	0.414063	0.443494	0.640258	0.463778	0.638052	0.638052		ALDEx2_t
0.40 mg/mL - 6.60 mg/mL	p__Firmicutes|c__Clostridia|o__Clostridiales|f__Ruminococcaceae|g__Acetivibrio|s__Acetivibrio ethanolgignens	-0.872949	2.31628	-0.336483	0.303896	0.320692	0.496227	0.273043	0.445962	0.445962		ALDEx2_t
0.40 mg/mL - 6.60 mg/mL	p__Firmicutes|c__Clostridia|o__Clostridiales|f__Ruminococcaceae|g__Ruminococcus|s__Ruminococcus bicirculans	1.18974	4.27235	0.230983	0.361979	0.453498	0.628295	0.411023	0.58186	0.58186		ALDEx2_t
0.40 mg/mL - 6.60 mg/mL	p__Firmicutes|c__Clostridia|o__Clostridiales|f__Clostridiaceae|g__Clostridium|s__Clostridium tarantellae	-0.805384	3.42164	-0.189539	0.364583	0.46855	0.631138	0.435095	0.610676	0.610676		ALDEx2_t
0.40 mg/mL - 6.60 mg/mL	p__Firmicutes|c__Clostridia|o__Clostridiales|f__Lachnospiraceae|g__Blautia|s__Blautia sp. SC05B48	-0.586381	3.72028	-0.153265	0.41039	0.589899	0.733208	0.549109	0.707232	0.707232		ALDEx2_t
0.40 mg/mL - 6.60 mg/mL	p__Firmicutes|c__Clostridia|o__Clostridiales|f__Ruminococcaceae|g__Acutalibacter|s__Acutalibacter muris	1.09594	4.56706	0.249258	0.384416	0.469287	0.649672	0.451435	0.621545	0.621545		ALDEx2_t
0.40 mg/mL - 6.60 mg/mL	p__Firmicutes|c__Clostridia|o__Clostridiales|f__Lachnospiraceae|g__Bariatricus|s__Bariatricus massiliensis	1.15712	3.36966	0.292114	0.356771	0.39549	0.596592	0.373776	0.553308	0.553308		ALDEx2_t
0.40 mg/mL - 6.60 mg/mL	p__Firmicutes|c__Clostridia|o__Clostridiales|f__Lachnospiraceae|g__Lacrimispora|s__Lacrimispora celerecrescens	-1.80738	3.96011	-0.424554	0.283117	0.246334	0.433411	0.225572	0.408455	0.408455		ALDEx2_t
0.40 mg/mL - 6.60 mg/mL	p__Firmicutes|c__Clostridia|o__Clostridiales|f__Lachnospiraceae|g__Lachnoclostridium|s__[Clostridium] populeti	-3.1498	3.05147	-0.883059	0.104167	0.035434	0.114086	0.0125155	0.0609929	0.0609929		ALDEx2_t
0.40 mg/mL - 6.60 mg/mL	p__Firmicutes|c__Clostridia|o__Clostridiales|f__Hungateiclostridiaceae|g__Anaerobacterium|s__Anaerobacterium chartisolvens	-3.7318	4.05688	-0.826975	0.197403	0.0782726	0.222708	0.052902	0.156187	0.156187		ALDEx2_t
0.40 mg/mL - 6.60 mg/mL	p__Firmicutes|c__Clostridia|o__Clostridiales|f__Clostridiaceae|g__Falcatimonas|s__Falcatimonas natans	-0.846354	3.56494	-0.203898	0.379221	0.459105	0.631267	0.497579	0.664628	0.664628		ALDEx2_t
0.40 mg/mL - 6.60 mg/mL	p__Firmicutes|c__Clostridia|o__Clostridiales|f__Peptostreptococcaceae|g__Romboutsia|s__Romboutsia ilealis	-4.45336	4.96257	-0.815587	0.197917	0.106037	0.254863	0.0780167	0.183208	0.183208		ALDEx2_t
0.40 mg/mL - 6.60 mg/mL	p__Firmicutes|c__Clostridia|o__Clostridiales|f__Clostridiaceae|g__Butyricicoccus|s__Butyricicoccus pullicaecorum	1.7254	3.70643	0.385246	0.299479	0.310719	0.506051	0.250358	0.421525	0.421525		ALDEx2_t
0.40 mg/mL - 6.60 mg/mL	p__Firmicutes|c__Clostridia|o__Clostridiales|f__Lachnospiraceae|g__Anaerostipes|s__Anaerostipes butyraticus	-0.680864	2.62478	-0.206129	0.375	0.32223	0.505861	0.436914	0.603787	0.603787		ALDEx2_t
0.40 mg/mL - 6.60 mg/mL	p__Firmicutes|c__Clostridia|o__Clostridiales|f__Lachnospiraceae|g__Lacrimispora|s__Lacrimispora algidixylanolytica	-1.6576	3.52298	-0.416228	0.293507	0.301527	0.473665	0.235327	0.412399	0.412399		ALDEx2_t
0.40 mg/mL - 6.60 mg/mL	p__Firmicutes|c__Clostridia|o__Clostridiales|f__Ruminococcaceae|g__Hydrogenoanaerobacterium|s__Hydrogenoanaerobacterium saccharovorans	0.371638	3.85824	0.0632503	0.450521	0.567477	0.730305	0.597683	0.746717	0.746717		ALDEx2_t
0.40 mg/mL - 6.60 mg/mL	p__Firmicutes|c__Clostridia|o__Clostridiales|f__|g__Colidextribacter|s__Colidextribacter massiliensis	0.473954	3.07344	0.137265	0.428571	0.510694	0.686323	0.545992	0.70115	0.70115		ALDEx2_t
0.40 mg/mL - 6.60 mg/mL	p__Firmicutes|c__Clostridia|o__Clostridiales|f__Ruminococcaceae|g__Negativibacillus|s__Negativibacillus massiliensis	1.09135	3.39595	0.253864	0.361039	0.441513	0.619226	0.396706	0.554152	0.554152		ALDEx2_t
0.40 mg/mL - 6.60 mg/mL	p__Firmicutes|c__Clostridia|o__Clostridiales|f__Ruminococcaceae|g__Harryflintia|s__Harryflintia acetispora	2.39555	3.20822	0.631105	0.197917	0.154243	0.326473	0.116371	0.22696	0.22696		ALDEx2_t
0.40 mg/mL - 6.60 mg/mL	p__Firmicutes|c__Clostridia|o__Clostridiales|f__|g__|s__Clostridiales bacterium CCNA10	2.29098	3.74991	0.555714	0.216146	0.176784	0.371401	0.10997	0.240899	0.240899		ALDEx2_t
0.40 mg/mL - 6.60 mg/mL	p__Firmicutes|c__Clostridia|o__Clostridiales|f__Hungateiclostridiaceae|g__Ruminiclostridium|s__Ruminiclostridium cellobioparum	-4.19633	4.57042	-0.785763	0.169271	0.114839	0.262201	0.0522708	0.152057	0.152057		ALDEx2_t
0.40 mg/mL - 6.60 mg/mL	p__Firmicutes|c__Clostridia|o__Clostridiales|f__Eubacteriaceae|g__Eubacterium|s__Eubacterium oxidoreducens	2.0545	3.52681	0.500451	0.25	0.267122	0.458386	0.212152	0.3543	0.3543		ALDEx2_t
0.40 mg/mL - 6.60 mg/mL	p__Firmicutes|c__Clostridia|o__Clostridiales|f__Lachnospiraceae|g__Anaerocolumna|s__Anaerocolumna xylanovorans	1.30485	3.63317	0.285045	0.356771	0.396627	0.584592	0.342232	0.514831	0.514831		ALDEx2_t
0.40 mg/mL - 6.60 mg/mL	p__Firmicutes|c__Clostridia|o__Clostridiales|f__Clostridiaceae|g__Hungatella|s__Hungatella xylanolytica	-1.61953	4.42222	-0.299168	0.355844	0.382393	0.553205	0.354335	0.527171	0.527171		ALDEx2_t
0.40 mg/mL - 6.60 mg/mL	p__Firmicutes|c__Clostridia|o__Clostridiales|f__Clostridiaceae|g__Clostridium|s__Clostridium saudiense	-0.875904	4.67822	-0.148616	0.434896	0.496388	0.6576	0.552866	0.700046	0.700046		ALDEx2_t
0.40 mg/mL - 6.60 mg/mL	p__Firmicutes|c__Clostridia|o__Clostridiales|f__Peptococcaceae|g__Dehalobacterium|s__Dehalobacterium formicoaceticum	1.33558	3.477	0.333809	0.320313	0.324508	0.520208	0.294959	0.454594	0.454594		ALDEx2_t
0.40 mg/mL - 6.60 mg/mL	p__Firmicutes|c__Clostridia|o__Clostridiales|f__Lachnospiraceae|g__Anaerobutyricum|s__Anaerobutyricum hallii	0.977127	3.98956	0.20057	0.402597	0.483528	0.661771	0.474952	0.641257	0.641257		ALDEx2_t
0.40 mg/mL - 6.60 mg/mL	p__Firmicutes|c__Clostridia|o__Clostridiales|f__Clostridiaceae|g__Clostridium|s__Clostridium subterminale	-1.26389	4.06151	-0.271103	0.364583	0.349464	0.53438	0.419416	0.599223	0.599223		ALDEx2_t
0.40 mg/mL - 6.60 mg/mL	p__Firmicutes|c__Clostridia|o__Clostridiales|f__Hungateiclostridiaceae|g__Ruminiclostridium|s__Ruminiclostridium cellulolyticum	-3.29026	3.86759	-0.78098	0.190104	0.104521	0.247939	0.0707038	0.180686	0.180686		ALDEx2_t
0.40 mg/mL - 6.60 mg/mL	p__Firmicutes|c__Clostridia|o__Clostridiales|f__Lachnospiraceae|g__Parasporobacterium|s__Parasporobacterium paucivorans	-1.42652	4.43811	-0.257158	0.372396	0.459879	0.629088	0.427515	0.594997	0.594997		ALDEx2_t
0.40 mg/mL - 6.60 mg/mL	p__Firmicutes|c__Clostridia|o__Clostridiales|f__|g__Ihubacter|s__Ihubacter massiliensis	0.610816	4.12981	0.108207	0.431169	0.570924	0.725402	0.627508	0.755693	0.755693		ALDEx2_t
0.40 mg/mL - 6.60 mg/mL	p__Firmicutes|c__Clostridia|o__Clostridiales|f__Clostridiaceae|g__Clostridium|s__Clostridium sp. JN-9	0.493416	3.71902	0.126576	0.434896	0.515444	0.688835	0.539726	0.698364	0.698364		ALDEx2_t
0.40 mg/mL - 6.60 mg/mL	p__Firmicutes|c__Clostridia|o__Clostridiales|f__Lachnospiraceae|g__Anaerostipes|s__Anaerostipes rhamnosivorans	-0.0752582	3.6818	-0.0117907	0.490909	0.507245	0.675148	0.583288	0.73456	0.73456		ALDEx2_t
0.40 mg/mL - 6.60 mg/mL	p__Firmicutes|c__Clostridia|o__Clostridiales|f__Peptococcaceae|g__|s__Peptococcaceae bacterium DCMF	0.264924	3.60991	0.0651942	0.47013	0.549947	0.712312	0.592198	0.742581	0.742581		ALDEx2_t
0.40 mg/mL - 6.60 mg/mL	p__Firmicutes|c__Clostridia|o__Clostridiales|f__Ruminococcaceae|g__|s__[Clostridium] methylpentosum	-0.365626	3.70022	-0.081605	0.444156	0.517893	0.678239	0.596449	0.736722	0.736722		ALDEx2_t
0.40 mg/mL - 6.60 mg/mL	p__Firmicutes|c__Clostridia|o__Clostridiales|f__|g__Massilistercora|s__Massilistercora timonensis	1.77239	3.77777	0.398511	0.302083	0.315836	0.515076	0.238195	0.404447	0.404447		ALDEx2_t
0.40 mg/mL - 6.60 mg/mL	p__Firmicutes|c__Clostridia|o__Clostridiales|f__Lachnospiraceae|g__Roseburia|s__Roseburia hominis	0.889401	3.69806	0.177667	0.403646	0.471557	0.645331	0.48853	0.641686	0.641686		ALDEx2_t
0.40 mg/mL - 6.60 mg/mL	p__Firmicutes|c__Clostridia|o__Clostridiales|f__Lachnospiraceae|g__|s__Lachnospiraceae bacterium oral taxon 500	-3.62038	3.87255	-0.909261	0.145834	0.0605213	0.164971	0.0253192	0.0892775	0.0892775		ALDEx2_t
0.40 mg/mL - 6.60 mg/mL	p__Firmicutes|c__Clostridia|o__Clostridiales|f__Hungateiclostridiaceae|g__Hungateiclostridium|s__Hungateiclostridium thermocellum	-3.40375	4.89368	-0.666051	0.228572	0.143021	0.297676	0.107346	0.241255	0.241255		ALDEx2_t
0.40 mg/mL - 6.60 mg/mL	p__Firmicutes|c__Clostridia|o__Clostridiales|f__Clostridiaceae|g__Clostridium|s__Clostridium beijerinckii	-0.32255	4.20217	-0.0769401	0.462338	0.464236	0.629407	0.537108	0.699933	0.699933		ALDEx2_t
0.40 mg/mL - 6.60 mg/mL	p__Firmicutes|c__Erysipelotrichia|o__Erysipelotrichales|f__Erysipelotrichaceae|g__Faecalitalea|s__Faecalitalea cylindroides	-2.97605	4.80882	-0.577247	0.221354	0.141717	0.304579	0.121656	0.253798	0.253798		ALDEx2_t
0.40 mg/mL - 6.60 mg/mL	p__Bacteroidetes|c__Bacteroidia|o__Bacteroidales|f__Rikenellaceae|g__Alistipes|s__Alistipes finegoldii	-0.241109	4.69047	-0.0429579	0.471354	0.494148	0.663109	0.542056	0.696477	0.696477		ALDEx2_t
0.40 mg/mL - 6.60 mg/mL	p__Firmicutes|c__Clostridia|o__Clostridiales|f__Lachnospiraceae|g__Blautia|s__Blautia sp. N6H1-15	-0.432015	4.14581	-0.0883093	0.449351	0.539487	0.695752	0.569494	0.726427	0.726427		ALDEx2_t
0.40 mg/mL - 6.60 mg/mL	p__Firmicutes|c__Clostridia|o__Clostridiales|f__Ruminococcaceae|g__Papillibacter|s__Papillibacter cinnamivorans	0.412343	3.68411	0.101441	0.451948	0.559562	0.717366	0.569655	0.722975	0.722975		ALDEx2_t
0.40 mg/mL - 6.60 mg/mL	p__Firmicutes|c__Clostridia|o__Clostridiales|f__Ruminococcaceae|g__Tepidibaculum|s__Tepidibaculum saccharolyticum	-1.14954	4.75988	-0.207155	0.382813	0.435708	0.606393	0.481483	0.641778	0.641778		ALDEx2_t
0.40 mg/mL - 6.60 mg/mL	p__Firmicutes|c__Clostridia|o__Clostridiales|f__Hungateiclostridiaceae|g__Hungateiclostridium|s__Hungateiclostridium straminisolvens	-3.50348	4.38851	-0.6973	0.194805	0.123129	0.281097	0.0879404	0.210208	0.210208		ALDEx2_t
0.40 mg/mL - 6.60 mg/mL	p__Firmicutes|c__Clostridia|o__Clostridiales|f__Hungateiclostridiaceae|g__|s__Hungateiclostridiaceae bacterium KB18	0.845063	4.24264	0.143734	0.427083	0.518112	0.684058	0.56972	0.716946	0.716946		ALDEx2_t
0.40 mg/mL - 6.60 mg/mL	p__Firmicutes|c__Clostridia|o__Clostridiales|f__Ruminococcaceae|g__|s__[Clostridium] viride	1.02026	3.98605	0.207777	0.379221	0.471671	0.647668	0.435811	0.604547	0.604547		ALDEx2_t
0.40 mg/mL - 6.60 mg/mL	p__Tenericutes|c__Mollicutes|o__Entomoplasmatales|f__Spiroplasmataceae|g__Spiroplasma|s__Spiroplasma lampyridicola	-3.07594	4.98398	-0.536196	0.27013	0.189463	0.364892	0.193183	0.33847	0.33847		ALDEx2_t
0.40 mg/mL - 6.60 mg/mL	p__Firmicutes|c__Clostridia|o__Clostridiales|f__Clostridiaceae|g__Clostridium|s__Clostridium disporicum	-0.365661	4.37573	-0.0850521	0.466146	0.471414	0.634415	0.530301	0.685129	0.685129		ALDEx2_t
0.40 mg/mL - 6.60 mg/mL	p__Firmicutes|c__Clostridia|o__Clostridiales|f__Clostridiaceae|g__Clostridium|s__Clostridium ventriculi	0.212746	3.8887	0.0551828	0.471354	0.519094	0.685332	0.545955	0.699335	0.699335		ALDEx2_t
0.40 mg/mL - 6.60 mg/mL	p__Firmicutes|c__Clostridia|o__Clostridiales|f__Ruminococcaceae|g__Anaeromassilibacillus|s__Anaeromassilibacillus senegalensis	-0.163913	3.60431	-0.037673	0.472727	0.533988	0.69045	0.572046	0.716323	0.716323		ALDEx2_t
0.40 mg/mL - 6.60 mg/mL	p__Tenericutes|c__Mollicutes|o__Entomoplasmatales|f__Spiroplasmataceae|g__Spiroplasma|s__Spiroplasma syrphidicola	-3.40438	4.24938	-0.674459	0.203125	0.142648	0.281583	0.10271	0.218599	0.218599		ALDEx2_t
0.40 mg/mL - 6.60 mg/mL	p__Tenericutes|c__Mollicutes|o__Entomoplasmatales|f__Spiroplasmataceae|g__Spiroplasma|s__Spiroplasma chrysopicola	-2.5143	4.94974	-0.470673	0.302083	0.277338	0.454806	0.263654	0.41199	0.41199		ALDEx2_t
0.40 mg/mL - 6.60 mg/mL	p__Firmicutes|c__Clostridia|o__Clostridiales|f__Ruminococcaceae|g__Caproiciproducens|s__Caproiciproducens galactitolivorans	0.81763	4.20509	0.162081	0.421875	0.478679	0.652208	0.470321	0.629881	0.629881		ALDEx2_t
0.40 mg/mL - 6.60 mg/mL	p__Bacteroidetes|c__Bacteroidia|o__Bacteroidales|f__Rikenellaceae|g__Alistipes|s__Alistipes communis	-0.371353	4.63999	-0.0688018	0.47013	0.495986	0.660306	0.502917	0.664885	0.664885		ALDEx2_t
0.40 mg/mL - 6.60 mg/mL	p__Firmicutes|c__Clostridia|o__Clostridiales|f__|g__Monoglobus|s__Monoglobus pectinilyticus	-0.931929	4.53687	-0.221264	0.4	0.42078	0.595631	0.451253	0.6222	0.6222		ALDEx2_t
0.40 mg/mL - 6.60 mg/mL	p__Firmicutes|c__Clostridia|o__Clostridiales|f__Ruminococcaceae|g__Faecalibacterium|s__Faecalibacterium prausnitzii	-0.878331	3.97662	-0.176768	0.387013	0.436111	0.607957	0.48476	0.64012	0.64012		ALDEx2_t
0.40 mg/mL - 6.60 mg/mL	p__Firmicutes|c__Clostridia|o__Clostridiales|f__Lachnospiraceae|g__Faecalicatena|s__Faecalicatena contorta	0.460802	4.12741	0.112176	0.438961	0.49337	0.667009	0.535816	0.681686	0.681686		ALDEx2_t
0.40 mg/mL - 6.60 mg/mL	p__Firmicutes|c__Clostridia|o__Clostridiales|f__Lachnospiraceae|g__Marvinbryantia|s__Marvinbryantia formatexigens	0.477622	3.96838	0.104841	0.445313	0.5148	0.672775	0.516051	0.669584	0.669584		ALDEx2_t
0.40 mg/mL - 6.60 mg/mL	p__Firmicutes|c__Erysipelotrichia|o__Erysipelotrichales|f__Erysipelotrichaceae|g__Turicibacter|s__Turicibacter sp. H121	0.501298	4.07713	0.108046	0.444156	0.515371	0.677944	0.555866	0.695278	0.695278		ALDEx2_t
0.40 mg/mL - 6.60 mg/mL	p__Firmicutes|c__Clostridia|o__Clostridiales|f__Lachnospiraceae|g__Lachnoclostridium|s__[Clostridium] scindens	-0.390831	3.99841	-0.0769389	0.467532	0.530246	0.685532	0.525797	0.681212	0.681212		ALDEx2_t
0.40 mg/mL - 6.60 mg/mL	p__Bacteroidetes|c__Bacteroidia|o__Bacteroidales|f__Rikenellaceae|g__Alistipes|s__Alistipes dispar	-0.21527	4.4102	-0.0392933	0.473958	0.530069	0.685647	0.583705	0.72004	0.72004		ALDEx2_t
0.40 mg/mL - 6.60 mg/mL	p__Firmicutes|c__Clostridia|o__Clostridiales|f__Lachnospiraceae|g__Schaedlerella|s__Schaedlerella arabinosiphila	-0.184933	4.08187	-0.0382865	0.481771	0.523545	0.673039	0.55202	0.696359	0.696359		ALDEx2_t
0.40 mg/mL - 6.60 mg/mL	p__Firmicutes|c__Clostridia|o__Clostridiales|f__Lachnospiraceae|g__Faecalicatena|s__Faecalicatena fissicatena	-1.25442	4.45117	-0.253296	0.371429	0.468225	0.625185	0.446828	0.607611	0.607611		ALDEx2_t
0.40 mg/mL - 6.60 mg/mL	p__Bacteroidetes|c__Bacteroidia|o__Bacteroidales|f__Rikenellaceae|g__Alistipes|s__Alistipes senegalensis	-0.669582	4.39326	-0.137049	0.433766	0.482819	0.646061	0.520521	0.674606	0.674606		ALDEx2_t
0.40 mg/mL - 6.60 mg/mL	p__Firmicutes|c__Clostridia|o__Clostridiales|f__Hungateiclostridiaceae|g__Hungateiclostridium|s__Hungateiclostridium clariflavum	-2.02442	4.38484	-0.402257	0.319481	0.316126	0.477653	0.28857	0.448241	0.448241		ALDEx2_t
0.40 mg/mL - 6.60 mg/mL	p__Bacteroidetes|c__Bacteroidia|o__Bacteroidales|f__Rikenellaceae|g__Alistipes|s__Alistipes putredinis	-0.530918	4.23276	-0.104089	0.442708	0.465668	0.629031	0.476083	0.636066	0.636066		ALDEx2_t
0.40 mg/mL - 0.80 mg/mL	p__Firmicutes|c__Clostridia|o__Clostridiales|f__Lachnospiraceae|g__|s__Lachnospiraceae bacterium GAM79	1.0503	2.98305	0.374395	0.309896	0.165836	0.663634	0.29006	0.7775	0.7775		ALDEx2_t
0.40 mg/mL -0.80 mg/mL	p__Firmicutes|c__Clostridia|o__Clostridiales|f__Lachnospiraceae|g__Lacrimispora|s__Lacrimispora saccharolytica	1.18433	3.02235	0.374931	0.322078	0.222998	0.688153	0.327142	0.79389	0.79389		ALDEx2_t
0.40 mg/mL - 0.80 mg/mL	p__Firmicutes|c__Clostridia|o__Clostridiales|f__Eubacteriaceae|g__Eubacterium|s__Eubacterium ventriosum	-2.1785	3.39549	-0.598318	0.260417	0.110109	0.642478	0.12091	0.713524	0.713524		ALDEx2_t
0.40 mg/mL -0.80 mg/mL	p__Firmicutes|c__Clostridia|o__Clostridiales|f__Lachnospiraceae|g__Eisenbergiella|s__Eisenbergiella massiliensis	1.33211	3.46138	0.34704	0.350649	0.186703	0.672867	0.308908	0.78421	0.78421		ALDEx2_t
0.40 mg/mL - 0.80 mg/mL	p__Firmicutes|c__Clostridia|o__Clostridiales|f__Clostridiaceae|g__Clostridium|s__Clostridium sp. BNL1100	-1.93994	3.57209	-0.511698	0.289063	0.143637	0.654657	0.188614	0.741013	0.741013		ALDEx2_t
0.40 mg/mL -0.80 mg/mL	p__Firmicutes|c__Clostridia|o__Clostridiales|f__Eubacteriaceae|g__Eubacterium|s__Eubacterium coprostanoligenes	-2.4203	4.57968	-0.493766	0.314286	0.160768	0.669042	0.247038	0.766407	0.766407		ALDEx2_t
0.40 mg/mL - 0.80 mg/mL	p__Firmicutes|c__Clostridia|o__Clostridiales|f__Lachnospiraceae|g__Lacrimispora|s__Lacrimispora sphenoides	1.98725	2.87867	0.624061	0.229167	0.0962556	0.640662	0.0978982	0.693485	0.693485		ALDEx2_t
0.40 mg/mL -0.80 mg/mL	p__Firmicutes|c__Clostridia|o__Clostridiales|f__Christensenellaceae|g__Christensenella|s__Christensenella minuta	-0.866463	3.22248	-0.202188	0.40625	0.324496	0.742195	0.655702	0.90221	0.90221		ALDEx2_t
0.40 mg/mL - 0.80 mg/mL	p__Firmicutes|c__Clostridia|o__Clostridiales|f__Clostridiaceae|g__Hungatella|s__Hungatella hathewayi	1.03278	2.42417	0.432795	0.299479	0.204299	0.68664	0.291755	0.776447	0.776447		ALDEx2_t
0.40 mg/mL -0.80 mg/mL	p__Firmicutes|c__Clostridia|o__Clostridiales|f__Eubacteriaceae|g__Eubacterium|s__Eubacterium xylanophilum	-1.13179	2.38612	-0.356467	0.288312	0.100888	0.641353	0.265204	0.769327	0.769327		ALDEx2_t
0.40 mg/mL - 0.80 mg/mL	p__Bacteroidetes|c__Bacteroidia|o__Bacteroidales|f__Muribaculaceae|g__Muribaculum|s__Muribaculum intestinale	1.48846	5.60091	0.249901	0.392208	0.444029	0.786683	0.558202	0.863004	0.863004		ALDEx2_t
0.40 mg/mL -0.80 mg/mL	p__Firmicutes|c__Clostridia|o__Clostridiales|f__Lachnospiraceae|g__Kineothrix|s__Kineothrix alysoides	2.1672	3.64879	0.517463	0.273438	0.112917	0.647858	0.14626	0.724485	0.724485		ALDEx2_t
0.40 mg/mL - 0.80 mg/mL	p__Firmicutes|c__Clostridia|o__Clostridiales|f__Hungateiclostridiaceae|g__Hungateiclostridium|s__Hungateiclostridium alkalicellulosi	-2.55185	4.13708	-0.554467	0.221354	0.0636463	0.630179	0.103857	0.699754	0.699754		ALDEx2_t
0.40 mg/mL -0.80 mg/mL	p__Firmicutes|c__Bacilli|o__Lactobacillales|f__Lactobacillaceae|g__Lactobacillus|s__Lactobacillus johnsonii	-1.26622	4.44865	-0.214683	0.394805	0.674719	0.888183	0.580402	0.87824	0.87824		ALDEx2_t
0.40 mg/mL - 0.80 mg/mL	p__Firmicutes|c__Clostridia|o__Clostridiales|f__|g__Flintibacter|s__Flintibacter sp. KGMB00164	0.887322	2.57565	0.283424	0.364583	0.524021	0.829534	0.493107	0.848979	0.848979		ALDEx2_t
0.40 mg/mL -0.80 mg/mL	p__Firmicutes|c__Clostridia|o__Clostridiales|f__Ruminococcaceae|g__Anaeromassilibacillus|s__Anaeromassilibacillus senegalensis	1.67487	5.37613	0.281397	0.390625	0.399922	0.769166	0.516924	0.845795	0.845795		ALDEx2_t
0.40 mg/mL - 0.80 mg/mL	p__Firmicutes|c__Clostridia|o__Clostridiales|f__Oscillospiraceae|g__Dysosmobacter|s__Dysosmobacter welbionis	0.765436	4.73694	0.153167	0.432292	0.641393	0.873475	0.68269	0.910768	0.910768		ALDEx2_t
0.40 mg/mL -0.80 mg/mL	p__Firmicutes|c__Clostridia|o__Clostridiales|f__Lachnospiraceae|g__Faecalimonas|s__Faecalimonas umbilicata	1.99783	4.40242	0.403338	0.322917	0.271803	0.713785	0.324084	0.788134	0.788134		ALDEx2_t
0.40 mg/mL - 0.80 mg/mL	p__Firmicutes|c__Clostridia|o__Clostridiales|f__Ruminococcaceae|g__Ruminococcus|s__Ruminococcus champanellensis	4.9391	5.03334	0.896547	0.171429	0.0647543	0.582999	0.0589957	0.635831	0.635831		ALDEx2_t
0.40 mg/mL -0.80 mg/mL	p__Bacteroidetes|c__Bacteroidia|o__Bacteroidales|f__Rikenellaceae|g__Alistipes|s__Alistipes dispar	1.9309	5.91035	0.33849	0.353247	0.315142	0.724747	0.417709	0.807429	0.807429		ALDEx2_t
0.40 mg/mL - 0.80 mg/mL	p__Firmicutes|c__Clostridia|o__Clostridiales|f__Lachnospiraceae|g__Anaerotaenia|s__Anaerotaenia torta	-0.407407	3.83756	-0.0881895	0.436364	0.720163	0.904036	0.70653	0.913676	0.913676		ALDEx2_t
0.40 mg/mL -0.80 mg/mL	p__Firmicutes|c__Clostridia|o__Clostridiales|f__Lachnospiraceae|g__Lachnoclostridium|s__Lachnoclostridium sp. YL32	1.02243	3.10198	0.285245	0.382813	0.387182	0.774663	0.460216	0.833561	0.833561		ALDEx2_t
0.40 mg/mL - 0.80 mg/mL	p__Firmicutes|c__Clostridia|o__Clostridiales|f__Lachnospiraceae|g__Acetatifactor|s__Acetatifactor muris	0.248118	4.57467	0.0340927	0.485714	0.668556	0.886053	0.739948	0.920335	0.920335		ALDEx2_t
0.40 mg/mL -0.80 mg/mL	p__Firmicutes|c__Clostridia|o__Clostridiales|f__Hungateiclostridiaceae|g__Hungateiclostridium|s__Hungateiclostridium aldrichii	-1.82973	5.19915	-0.320606	0.375	0.503567	0.822323	0.495551	0.853118	0.853118		ALDEx2_t
0.40 mg/mL - 0.80 mg/mL	p__Firmicutes|c__Clostridia|o__Clostridiales|f__Hungateiclostridiaceae|g__Pseudoclostridium|s__Pseudoclostridium thermosuccinogenes	-2.1768	3.80566	-0.48568	0.303896	0.330893	0.741602	0.293474	0.778969	0.778969		ALDEx2_t
0.40 mg/mL -0.80 mg/mL	p__Firmicutes|c__Clostridia|o__Clostridiales|f__Christensenellaceae|g__Christensenella|s__Christensenella massiliensis	1.49059	3.88241	0.352446	0.332468	0.382518	0.762375	0.302709	0.776921	0.776921		ALDEx2_t
0.40 mg/mL - 0.80 mg/mL	p__Firmicutes|c__Clostridia|o__Clostridiales|f__Lachnospiraceae|g__Lachnospira|s__Lachnospira eligens	-2.42787	2.53711	-0.867848	0.163637	0.0360486	0.571593	0.0325007	0.600105	0.600105		ALDEx2_t
0.40 mg/mL -0.80 mg/mL	p__Firmicutes|c__Clostridia|o__Clostridiales|f__Clostridiaceae|g__Geosporobacter|s__Geosporobacter ferrireducens	0.824231	4.15237	0.187069	0.41039	0.569789	0.845627	0.473794	0.839871	0.839871		ALDEx2_t
0.40 mg/mL - 0.80 mg/mL	p__Firmicutes|c__Clostridia|o__Clostridiales|f__Ruminococcaceae|g__Flavonifractor|s__Flavonifractor plautii	1.56604	3.7994	0.353751	0.296875	0.353291	0.754424	0.241228	0.761809	0.761809		ALDEx2_t
0.40 mg/mL -0.80 mg/mL	p__Firmicutes|c__Clostridia|o__Clostridiales|f__Lachnospiraceae|g__Blautia|s__Blautia sp. YL58	1.45416	4.16107	0.318844	0.322078	0.343196	0.74243	0.304691	0.78178	0.78178		ALDEx2_t
0.40 mg/mL - 0.80 mg/mL	p__Firmicutes|c__Clostridia|o__Clostridiales|f__Ruminococcaceae|g__Phocea|s__Phocea massiliensis	0.975757	4.26477	0.224188	0.390625	0.41753	0.78098	0.518706	0.853577	0.853577		ALDEx2_t
0.40 mg/mL -0.80 mg/mL	p__Firmicutes|c__Clostridia|o__Clostridiales|f__Hungateiclostridiaceae|g__Hungateiclostridium|s__Hungateiclostridium saccincola	-2.92546	4.04045	-0.658381	0.242188	0.163142	0.672098	0.135209	0.718293	0.718293		ALDEx2_t
0.40 mg/mL - 0.80 mg/mL	p__Firmicutes|c__Clostridia|o__Clostridiales|f__Lachnospiraceae|g__Herbinix|s__Herbinix luporum	0.971184	3.33372	0.24998	0.395833	0.563825	0.841421	0.593717	0.876493	0.876493		ALDEx2_t
0.40 mg/mL -0.80 mg/mL	p__Firmicutes|c__Clostridia|o__Clostridiales|f__Lachnospiraceae|g__Blautia|s__Blautia producta	0.192497	4.56484	0.0409682	0.476563	0.619619	0.860752	0.77462	0.938654	0.938654		ALDEx2_t
0.40 mg/mL - 0.80 mg/mL	p__Firmicutes|c__Clostridia|o__Clostridiales|f__Ruminococcaceae|g__Anaerotruncus|s__Anaerotruncus rubiinfantis	0.856564	2.93094	0.250372	0.369792	0.505026	0.815957	0.40307	0.816011	0.816011		ALDEx2_t
0.40 mg/mL -0.80 mg/mL	p__Firmicutes|c__Clostridia|o__Clostridiales|f__Lachnospiraceae|g__Eisenbergiella|s__Eisenbergiella tayi	1.12934	3.25387	0.339667	0.324675	0.267569	0.705718	0.325602	0.78626	0.78626		ALDEx2_t
0.40 mg/mL - 0.80 mg/mL	p__Firmicutes|c__Clostridia|o__Clostridiales|f__Hungateiclostridiaceae|g__Hungateiclostridium|s__Hungateiclostridium cellulolyticum	-2.00944	5.36467	-0.317165	0.34375	0.524494	0.827027	0.359958	0.800237	0.800237		ALDEx2_t
0.40 mg/mL -0.80 mg/mL	p__Firmicutes|c__Clostridia|o__Clostridiales|f__Lachnospiraceae|g__Lachnoclostridium|s__Lachnoclostridium phytofermentans	-0.126524	3.75971	-0.0172027	0.481771	0.666169	0.885276	0.751887	0.927637	0.927637		ALDEx2_t
0.40 mg/mL - 0.80 mg/mL	p__Firmicutes|c__Erysipelotrichia|o__Erysipelotrichales|f__Erysipelotrichaceae|g__Breznakia|s__Breznakia pachnodae	-3.03474	4.91618	-0.54783	0.275325	0.157762	0.662239	0.169731	0.72713	0.72713		ALDEx2_t
0.40 mg/mL -0.80 mg/mL	p__Firmicutes|c__Clostridia|o__Clostridiales|f__Clostridiaceae|g__Clostridium|s__Clostridium botulinum	-0.711004	4.69795	-0.127523	0.4375	0.510812	0.819178	0.639688	0.895967	0.895967		ALDEx2_t
0.40 mg/mL - 0.80 mg/mL	p__Firmicutes|c__Clostridia|o__Clostridiales|f__Oscillospiraceae|g__Oscillibacter|s__Oscillibacter valericigenes	0.854991	4.40215	0.192906	0.38961	0.547724	0.837973	0.573335	0.871939	0.871939		ALDEx2_t
0.40 mg/mL -0.80 mg/mL	p__Firmicutes|c__Clostridia|o__Clostridiales|f__Ruminococcaceae|g__|s__[Eubacterium] siraeum	-0.62965	4.34526	-0.129576	0.414063	0.613544	0.858659	0.624432	0.889941	0.889941		ALDEx2_t
0.40 mg/mL - 0.80 mg/mL	p__Firmicutes|c__Clostridia|o__Clostridiales|f__Lachnospiraceae|g__Lachnoclostridium|s__[Clostridium] populeti	-0.780604	2.41925	-0.270555	0.356771	0.366985	0.755621	0.415155	0.820657	0.820657		ALDEx2_t
0.40 mg/mL -0.80 mg/mL	p__Firmicutes|c__Clostridia|o__Clostridiales|f__Ruminococcaceae|g__Acutalibacter|s__Acutalibacter muris	1.32275	4.52587	0.253523	0.369792	0.406008	0.766453	0.463665	0.818399	0.818399		ALDEx2_t
0.40 mg/mL - 0.80 mg/mL	p__Firmicutes|c__Clostridia|o__Clostridiales|f__Lachnospiraceae|g__Enterocloster|s__Enterocloster bolteae	-0.613195	2.87878	-0.178238	0.411458	0.491652	0.80954	0.574564	0.871184	0.871184		ALDEx2_t
0.40 mg/mL -0.80 mg/mL	p__Firmicutes|c__Clostridia|o__Clostridiales|f__Peptostreptococcaceae|g__Romboutsia|s__Romboutsia ilealis	-2.50157	5.47243	-0.414848	0.302083	0.317173	0.727347	0.332049	0.776604	0.776604		ALDEx2_t
0.40 mg/mL - 0.80 mg/mL	p__Firmicutes|c__Clostridia|o__Clostridiales|f__Lachnospiraceae|g__Butyrivibrio|s__Butyrivibrio crossotus	0.346911	3.26338	0.0805606	0.446753	0.618447	0.867028	0.673875	0.9008	0.9008		ALDEx2_t
0.40 mg/mL -0.80 mg/mL	p__Firmicutes|c__Clostridia|o__Clostridiales|f__Clostridiaceae|g__Clostridium|s__Clostridium merdae	2.17074	5.04049	0.384081	0.337662	0.360203	0.744333	0.394057	0.805881	0.805881		ALDEx2_t
0.40 mg/mL - 0.80 mg/mL	p__Firmicutes|c__Clostridia|o__Clostridiales|f__Lachnospiraceae|g__Lacrimispora|s__Lacrimispora indolis	0.564554	3.14017	0.158832	0.412987	0.556729	0.83422	0.605383	0.885889	0.885889		ALDEx2_t
0.40 mg/mL -0.80 mg/mL	p__Firmicutes|c__Clostridia|o__Clostridiales|f__Christensenellaceae|g__Christensenella|s__Christensenella timonensis	-1.07072	4.77754	-0.200617	0.424479	0.509587	0.812361	0.628686	0.890095	0.890095		ALDEx2_t
0.40 mg/mL - 0.80 mg/mL	p__Firmicutes|c__Clostridia|o__Clostridiales|f__Catabacteriaceae|g__Catabacter|s__Catabacter hongkongensis	-0.0109377	4.49765	-0.00121471	0.498701	0.657141	0.876243	0.741027	0.923851	0.923851		ALDEx2_t
0.40 mg/mL -0.80 mg/mL	p__Firmicutes|c__Clostridia|o__Clostridiales|f__Lachnospiraceae|g__Lacrimispora|s__Lacrimispora celerecrescens	-0.4544	4.44501	-0.0925678	0.446753	0.622522	0.862537	0.763783	0.927303	0.927303		ALDEx2_t
0.40 mg/mL - 0.80 mg/mL	p__Firmicutes|c__Clostridia|o__Clostridiales|f__Clostridiaceae|g__Clostridium|s__Clostridium tarantellae	-0.312661	4.97095	-0.0534119	0.477922	0.573319	0.847538	0.719628	0.919488	0.919488		ALDEx2_t
0.40 mg/mL -0.80 mg/mL	p__Firmicutes|c__Clostridia|o__Clostridiales|f__Lachnospiraceae|g__|s__Lachnospiraceae bacterium Choco86	0.610752	4.11079	0.120448	0.432292	0.561729	0.842418	0.616805	0.880562	0.880562		ALDEx2_t
0.40 mg/mL - 0.80 mg/mL	p__Firmicutes|c__Clostridia|o__Clostridiales|f__Lachnospiraceae|g__Lacrimispora|s__Lacrimispora amygdalina	0.502369	3.6043	0.141297	0.418182	0.481917	0.8128	0.619418	0.882215	0.882215		ALDEx2_t
0.40 mg/mL -0.80 mg/mL	p__Firmicutes|c__Clostridia|o__Clostridiales|f__Lachnospiraceae|g__Anaerocolumna|s__Anaerocolumna cellulosilytica	-0.65844	3.67997	-0.156445	0.40625	0.452944	0.791207	0.536934	0.860839	0.860839		ALDEx2_t
0.40 mg/mL - 0.80 mg/mL	p__Firmicutes|c__Clostridia|o__Clostridiales|f__Hungateiclostridiaceae|g__Anaerobacterium|s__Anaerobacterium chartisolvens	-2.89361	4.34554	-0.641672	0.265625	0.171446	0.654819	0.157278	0.711938	0.711938		ALDEx2_t
0.40 mg/mL -0.80 mg/mL	p__Firmicutes|c__Clostridia|o__Clostridiales|f__Clostridiaceae|g__Clostridium|s__Clostridium sp. SY8519	-0.113127	4.2206	-0.0298201	0.488312	0.592297	0.852126	0.670501	0.901167	0.901167		ALDEx2_t
0.40 mg/mL - 0.80 mg/mL	p__Firmicutes|c__Clostridia|o__Clostridiales|f__Lachnospiraceae|g__Faecalicatena|s__Faecalicatena orotica	-0.293548	3.93161	-0.0727978	0.467532	0.616386	0.862176	0.660197	0.90114	0.90114		ALDEx2_t
0.40 mg/mL -0.80 mg/mL	p__Firmicutes|c__Clostridia|o__Clostridiales|f__Hungateiclostridiaceae|g__Ruminiclostridium|s__Ruminiclostridium cellobioparum	-2.51233	4.62669	-0.502509	0.263021	0.247811	0.698001	0.176987	0.715545	0.715545		ALDEx2_t
0.40 mg/mL - 0.80 mg/mL	p__Firmicutes|c__Clostridia|o__Clostridiales|f__Lachnospiraceae|g__Mediterraneibacter|s__[Ruminococcus] gnavus	-0.0814641	3.66654	-0.0180409	0.492188	0.612963	0.862355	0.687631	0.906228	0.906228		ALDEx2_t
0.40 mg/mL -0.80 mg/mL	p__Firmicutes|c__Clostridia|o__Clostridiales|f__Lachnospiraceae|g__Robinsoniella|s__Robinsoniella peoriensis	0.619487	3.61654	0.175406	0.418182	0.575859	0.845938	0.627047	0.888432	0.888432		ALDEx2_t
0.40 mg/mL - 0.80 mg/mL	p__Firmicutes|c__Clostridia|o__Clostridiales|f__Lachnospiraceae|g__Anaerostipes|s__Anaerostipes hadrus	0.648625	3.22828	0.160428	0.419271	0.55783	0.837353	0.600544	0.876177	0.876177		ALDEx2_t
0.40 mg/mL -0.80 mg/mL	p__Firmicutes|c__Clostridia|o__Clostridiales|f__Ruminococcaceae|g__Acetivibrio|s__Acetivibrio ethanolgignens	-0.466607	2.53765	-0.16469	0.390625	0.455374	0.792692	0.493448	0.840088	0.840088		ALDEx2_t
0.40 mg/mL - 0.80 mg/mL	p__Firmicutes|c__Clostridia|o__Clostridiales|f__Clostridiaceae|g__Clostridium|s__Clostridium saudiense	0.366612	4.82545	0.0734231	0.466146	0.573522	0.843078	0.61303	0.88312	0.88312		ALDEx2_t
0.40 mg/mL -0.80 mg/mL	p__Firmicutes|c__Erysipelotrichia|o__Erysipelotrichales|f__Erysipelotrichaceae|g__Turicibacter|s__Turicibacter sp. H121	1.96839	5.04865	0.352127	0.348052	0.355626	0.745499	0.369478	0.785278	0.785278		ALDEx2_t
0.40 mg/mL - 0.80 mg/mL	p__Firmicutes|c__Clostridia|o__Clostridiales|f__Lachnospiraceae|g__Blautia|s__Blautia sp. SC05B48	-0.753617	4.03196	-0.133862	0.411458	0.543929	0.832878	0.578584	0.869443	0.869443		ALDEx2_t
0.40 mg/mL -0.80 mg/mL	p__Firmicutes|c__Clostridia|o__Clostridiales|f__Lachnospiraceae|g__Anaerostipes|s__Anaerostipes butyraticus	0.0406763	2.74455	0.0125016	0.496104	0.581527	0.849504	0.651602	0.892173	0.892173		ALDEx2_t
0.40 mg/mL - 0.80 mg/mL	p__Firmicutes|c__Bacilli|o__Lactobacillales|f__Lactobacillaceae|g__Lactobacillus|s__Lactobacillus rogosae	-2.95991	3.56838	-0.685311	0.184416	0.133117	0.613633	0.066135	0.627055	0.627055		ALDEx2_t
0.40 mg/mL -0.80 mg/mL	p__Firmicutes|c__Clostridia|o__Clostridiales|f__Lachnospiraceae|g__|s__Lachnospiraceae bacterium oral taxon 500	-2.23827	4.37891	-0.426683	0.277922	0.316933	0.724903	0.23922	0.743251	0.743251		ALDEx2_t
0.40 mg/mL - 0.80 mg/mL	p__Bacteroidetes|c__Bacteroidia|o__Bacteroidales|f__Muribaculaceae|g__Duncaniella|s__Duncaniella sp. B8	1.45359	5.06917	0.276386	0.364583	0.402836	0.761022	0.465012	0.816219	0.816219		ALDEx2_t
0.40 mg/mL -0.80 mg/mL	p__Firmicutes|c__Clostridia|o__Clostridiales|f__Lachnospiraceae|g__Bariatricus|s__Bariatricus massiliensis	0.636033	3.96015	0.128988	0.431169	0.559905	0.839452	0.609125	0.882017	0.882017		ALDEx2_t
0.40 mg/mL - 0.80 mg/mL	p__Firmicutes|c__Clostridia|o__Clostridiales|f__Peptostreptococcaceae|g__Clostridioides|s__Clostridioides difficile	-0.11305	5.19133	-0.0291667	0.490909	0.609302	0.864296	0.661778	0.898091	0.898091		ALDEx2_t
0.40 mg/mL -0.80 mg/mL	p__Firmicutes|c__Erysipelotrichia|o__Erysipelotrichales|f__Erysipelotrichaceae|g__Faecalitalea|s__Faecalitalea cylindroides	-1.3525	4.64781	-0.280061	0.377604	0.481541	0.811188	0.49841	0.845028	0.845028		ALDEx2_t
0.40 mg/mL - 0.80 mg/mL	p__Firmicutes|c__Clostridia|o__Clostridiales|f__Lachnospiraceae|g__Lachnoclostridium|s__[Clostridium] polysaccharolyticum	-0.97321	4.15491	-0.203023	0.394805	0.523462	0.818438	0.526671	0.856009	0.856009		ALDEx2_t
0.40 mg/mL -0.80 mg/mL	p__Firmicutes|c__Clostridia|o__Clostridiales|f__Lachnospiraceae|g__Roseburia|s__Roseburia intestinalis	0.045405	4.30426	0.00901013	0.493506	0.559662	0.838257	0.654476	0.902956	0.902956		ALDEx2_t
0.40 mg/mL - 0.80 mg/mL	p__Firmicutes|c__Clostridia|o__Clostridiales|f__Ruminococcaceae|g__Ruminococcus|s__Ruminococcus bicirculans	1.78926	4.63614	0.354119	0.337662	0.322878	0.734799	0.338999	0.783928	0.783928		ALDEx2_t
0.40 mg/mL -0.80 mg/mL	p__Firmicutes|c__Clostridia|o__Clostridiales|f__Lachnospiraceae|g__Lacrimispora|s__Lacrimispora algidixylanolytica	-1.51365	3.24279	-0.34916	0.319481	0.390421	0.759715	0.328648	0.769644	0.769644		ALDEx2_t
0.40 mg/mL - 0.80 mg/mL	p__Firmicutes|c__Clostridia|o__Clostridiales|f__Clostridiaceae|g__Clostridium|s__Clostridium ventriculi	0.681041	5.01516	0.147272	0.429688	0.509493	0.821217	0.567356	0.869526	0.869526		ALDEx2_t
0.40 mg/mL -0.80 mg/mL	p__Firmicutes|c__Clostridia|o__Clostridiales|f__Hungateiclostridiaceae|g__|s__Hungateiclostridiaceae bacterium KB18	1.65109	4.40896	0.361575	0.317708	0.346404	0.739578	0.334509	0.757481	0.757481		ALDEx2_t
0.40 mg/mL - 0.80 mg/mL	p__Tenericutes|c__Mollicutes|o__Entomoplasmatales|f__Spiroplasmataceae|g__Spiroplasma|s__Spiroplasma syrphidicola	-1.30671	4.6227	-0.251706	0.351563	0.401709	0.766606	0.379894	0.794355	0.794355		ALDEx2_t
0.40 mg/mL -0.80 mg/mL	p__Firmicutes|c__Clostridia|o__Clostridiales|f__Clostridiaceae|g__Falcatimonas|s__Falcatimonas natans	-1.5849	3.69979	-0.359772	0.301299	0.304199	0.722208	0.325844	0.768757	0.768757		ALDEx2_t
0.40 mg/mL - 0.80 mg/mL	p__Firmicutes|c__Clostridia|o__Clostridiales|f__Oscillospiraceae|g__Oscillibacter|s__Oscillibacter sp. PEA192	-0.541969	3.97486	-0.0920877	0.445313	0.55061	0.830811	0.62692	0.885133	0.885133		ALDEx2_t
0.40 mg/mL -0.80 mg/mL	p__Tenericutes|c__Mollicutes|o__Entomoplasmatales|f__Spiroplasmataceae|g__Spiroplasma|s__Spiroplasma lampyridicola	-1.1705	5.14484	-0.190017	0.414063	0.509629	0.815256	0.539677	0.855636	0.855636		ALDEx2_t
0.40 mg/mL - 0.80 mg/mL	p__Firmicutes|c__Clostridia|o__Clostridiales|f__Hungateiclostridiaceae|g__Ruminiclostridium|s__Ruminiclostridium cellulolyticum	-2.45456	3.95343	-0.527814	0.242188	0.174947	0.638149	0.164215	0.674648	0.674648		ALDEx2_t
0.40 mg/mL -0.80 mg/mL	p__Firmicutes|c__Clostridia|o__Clostridiales|f__Hungateiclostridiaceae|g__Hungateiclostridium|s__Hungateiclostridium thermocellum	-2.81817	4.73198	-0.501775	0.254546	0.267629	0.709266	0.254775	0.75432	0.75432		ALDEx2_t
0.40 mg/mL - 0.80 mg/mL	p__Firmicutes|c__Clostridia|o__Clostridiales|f__Lachnospiraceae|g__Parasporobacterium|s__Parasporobacterium paucivorans	-1.08693	4.61406	-0.219356	0.382813	0.469865	0.79865	0.505112	0.843033	0.843033		ALDEx2_t
0.40 mg/mL -0.80 mg/mL	p__Firmicutes|c__Clostridia|o__Clostridiales|f__Clostridiaceae|g__Hungatella|s__Hungatella xylanolytica	-1.95284	4.43337	-0.394255	0.330729	0.372728	0.740977	0.384422	0.786526	0.786526		ALDEx2_t
0.40 mg/mL - 0.80 mg/mL	p__Tenericutes|c__Mollicutes|o__Entomoplasmatales|f__Spiroplasmataceae|g__Spiroplasma|s__Spiroplasma chrysopicola	-0.975136	4.50437	-0.165102	0.431169	0.518053	0.822316	0.559895	0.864745	0.864745		ALDEx2_t
0.40 mg/mL -0.80 mg/mL	p__Bacteroidetes|c__Bacteroidia|o__Bacteroidales|f__Rikenellaceae|g__Alistipes|s__Alistipes megaguti	1.7201	4.78067	0.327771	0.346354	0.420742	0.768423	0.428835	0.812011	0.812011		ALDEx2_t
0.40 mg/mL - 0.80 mg/mL	p__Firmicutes|c__Clostridia|o__Clostridiales|f__Hungateiclostridiaceae|g__Hungateiclostridium|s__Hungateiclostridium straminisolvens	-1.89591	4.48109	-0.405951	0.309091	0.29802	0.723166	0.257434	0.755511	0.755511		ALDEx2_t
0.40 mg/mL -0.80 mg/mL	p__Firmicutes|c__Clostridia|o__Clostridiales|f__Lachnospiraceae|g__Anaerotignum|s__Anaerotignum lactatifermentans	0.662365	4.67011	0.134053	0.433766	0.552983	0.831125	0.603231	0.88	0.88		ALDEx2_t
0.40 mg/mL - 0.80 mg/mL	p__Firmicutes|c__Clostridia|o__Clostridiales|f__Ruminococcaceae|g__Pseudoflavonifractor|s__Pseudoflavonifractor phocaeensis	-1.52665	3.96797	-0.323122	0.335065	0.397998	0.76253	0.385369	0.788692	0.788692		ALDEx2_t
0.40 mg/mL -0.80 mg/mL	p__Firmicutes|c__Clostridia|o__Clostridiales|f__|g__Colidextribacter|s__Colidextribacter massiliensis	0.182735	3.769	0.0420504	0.484375	0.567421	0.845437	0.63883	0.888317	0.888317		ALDEx2_t
0.40 mg/mL - 0.80 mg/mL	p__Bacteroidetes|c__Bacteroidia|o__Bacteroidales|f__Rikenellaceae|g__Alistipes|s__Alistipes putredinis	1.14363	4.64634	0.223388	0.402597	0.508654	0.810165	0.529488	0.83645	0.83645		ALDEx2_t
0.40 mg/mL -0.80 mg/mL	p__Bacteroidetes|c__Bacteroidia|o__Bacteroidales|f__Rikenellaceae|g__Alistipes|s__Alistipes senegalensis	1.36624	4.52045	0.279919	0.354167	0.480997	0.797329	0.470135	0.831643	0.831643		ALDEx2_t
0.40 mg/mL - 0.80 mg/mL	p__Firmicutes|c__Clostridia|o__Clostridiales|f__Clostridiaceae|g__Clostridium|s__Clostridium subterminale	-1.00077	4.41799	-0.237273	0.377604	0.470328	0.79145	0.512058	0.841323	0.841323		ALDEx2_t
0.40 mg/mL -0.80 mg/mL	p__Firmicutes|c__Clostridia|o__Clostridiales|f__Lachnospiraceae|g__Anaerostipes|s__Anaerostipes rhamnosivorans	0.159524	3.27199	0.0429915	0.472727	0.534114	0.82858	0.592603	0.872752	0.872752		ALDEx2_t
0.40 mg/mL - 0.80 mg/mL	p__Firmicutes|c__Clostridia|o__Clostridiales|f__Ruminococcaceae|g__Caproiciproducens|s__Caproiciproducens galactitolivorans	1.45862	4.3989	0.285509	0.358442	0.461311	0.794281	0.466319	0.828158	0.828158		ALDEx2_t
0.40 mg/mL -0.80 mg/mL	p__Firmicutes|c__Clostridia|o__Clostridiales|f__Ruminococcaceae|g__Pseudoflavonifractor|s__Pseudoflavonifractor capillosus	0.979022	4.16502	0.180535	0.387013	0.461842	0.79198	0.466738	0.8313	0.8313		ALDEx2_t
0.40 mg/mL - 0.80 mg/mL	p__Firmicutes|c__Clostridia|o__Clostridiales|f__Ruminococcaceae|g__Paludicola|s__Paludicola psychrotolerans	-0.0503662	3.69495	-0.0166305	0.494792	0.518788	0.820552	0.596638	0.871881	0.871881		ALDEx2_t
0.40 mg/mL -0.80 mg/mL	p__Firmicutes|c__Clostridia|o__Clostridiales|f__Clostridiaceae|g__Clostridium|s__Clostridium sp. JN-9	0.120309	4.01714	0.0281937	0.484375	0.576831	0.844703	0.634611	0.890138	0.890138		ALDEx2_t
0.40 mg/mL - 0.80 mg/mL	p__Firmicutes|c__Clostridia|o__Clostridiales|f__Lachnospiraceae|g__Blautia|s__Blautia sp. N6H1-15	-0.30548	4.25483	-0.0677618	0.460938	0.560436	0.835646	0.633002	0.890032	0.890032		ALDEx2_t
0.40 mg/mL -0.80 mg/mL	p__Firmicutes|c__Clostridia|o__Clostridiales|f__Clostridiaceae|g__Clostridium|s__Clostridium beijerinckii	-0.105586	4.08778	-0.0193443	0.486979	0.547998	0.833111	0.56968	0.871039	0.871039		ALDEx2_t
0.40 mg/mL - 0.80 mg/mL	p__Firmicutes|c__Clostridia|o__Clostridiales|f__Lachnospiraceae|g__Anaerobutyricum|s__Anaerobutyricum hallii	0.39055	4.12985	0.0663043	0.454545	0.584225	0.843385	0.639136	0.884423	0.884423		ALDEx2_t
0.40 mg/mL -0.80 mg/mL	p__Firmicutes|c__Clostridia|o__Clostridiales|f__Lachnospiraceae|g__Lachnoclostridium|s__Lachnoclostridium pacaense	-0.504726	3.98623	-0.111531	0.441558	0.544591	0.830477	0.591233	0.869097	0.869097		ALDEx2_t
0.40 mg/mL - 0.80 mg/mL	p__Firmicutes|c__Clostridia|o__Clostridiales|f__Lachnospiraceae|g__Roseburia|s__Roseburia hominis	0.868332	3.92235	0.217654	0.392208	0.470195	0.79429	0.440557	0.808978	0.808978		ALDEx2_t
0.40 mg/mL -0.80 mg/mL	p__Firmicutes|c__Clostridia|o__Clostridiales|f__Hungateiclostridiaceae|g__Hungateiclostridium|s__Hungateiclostridium clariflavum	0.103815	4.40606	0.0262449	0.489583	0.580078	0.84341	0.652584	0.889365	0.889365		ALDEx2_t
0.40 mg/mL - 0.80 mg/mL	p__Firmicutes|c__Clostridia|o__Clostridiales|f__Lachnospiraceae|g__Schaedlerella|s__Schaedlerella arabinosiphila	0.796191	3.91625	0.18193	0.398438	0.513956	0.815278	0.51512	0.837784	0.837784		ALDEx2_t
0.40 mg/mL -0.80 mg/mL	p__Firmicutes|c__Clostridia|o__Clostridiales|f__Ruminococcaceae|g__Hydrogenoanaerobacterium|s__Hydrogenoanaerobacterium saccharovorans	-1.32312	4.50352	-0.238339	0.369792	0.459411	0.791906	0.482551	0.838556	0.838556		ALDEx2_t
0.40 mg/mL - 0.80 mg/mL	p__Firmicutes|c__Clostridia|o__Clostridiales|f__|g__Intestinimonas|s__Intestinimonas butyriciproducens	1.07829	3.65401	0.262377	0.382813	0.462735	0.794341	0.50089	0.845224	0.845224		ALDEx2_t
0.40 mg/mL -0.80 mg/mL	p__Firmicutes|c__Clostridia|o__Clostridiales|f__Eubacteriaceae|g__Eubacterium|s__Eubacterium oxidoreducens	1.15534	4.29338	0.221384	0.388021	0.456424	0.794855	0.47484	0.826188	0.826188		ALDEx2_t
0.40 mg/mL - 0.80 mg/mL	p__Firmicutes|c__Clostridia|o__Clostridiales|f__Peptococcaceae|g__|s__Peptococcaceae bacterium DCMF	-0.415936	4.20233	-0.0837518	0.447917	0.516191	0.819312	0.61899	0.884015	0.884015		ALDEx2_t
0.40 mg/mL -0.80 mg/mL	p__Firmicutes|c__Clostridia|o__Clostridiales|f__Ruminococcaceae|g__Faecalibacterium|s__Faecalibacterium prausnitzii	-0.222608	4.01554	-0.0512229	0.47013	0.531878	0.828162	0.581452	0.871683	0.871683		ALDEx2_t
0.40 mg/mL - 0.80 mg/mL	p__Firmicutes|c__Clostridia|o__Clostridiales|f__|g__Massilistercora|s__Massilistercora timonensis	1.2215	4.48126	0.241845	0.379221	0.463398	0.796484	0.470688	0.831793	0.831793		ALDEx2_t
0.40 mg/mL -0.80 mg/mL	p__Firmicutes|c__Clostridia|o__Clostridiales|f__Clostridiaceae|g__Clostridium|s__Clostridium disporicum	0.564015	3.75845	0.120776	0.438961	0.510835	0.821033	0.539985	0.857665	0.857665		ALDEx2_t
0.40 mg/mL - 0.80 mg/mL	p__Firmicutes|c__Clostridia|o__Clostridiales|f__Lachnospiraceae|g__Anaerotignum|s__Anaerotignum aminivorans	-0.178442	4.34378	-0.0451746	0.475325	0.557307	0.834444	0.623484	0.885511	0.885511		ALDEx2_t
0.40 mg/mL -0.80 mg/mL	p__Firmicutes|c__Clostridia|o__Clostridiales|f__Peptococcaceae|g__Dehalobacterium|s__Dehalobacterium formicoaceticum	0.30125	4.01411	0.0662818	0.464935	0.544774	0.832959	0.568787	0.873724	0.873724		ALDEx2_t
0.40 mg/mL - 0.80 mg/mL	p__Firmicutes|c__Clostridia|o__Clostridiales|f__|g__Ihubacter|s__Ihubacter massiliensis	0.392702	3.93743	0.0825576	0.45974	0.530946	0.824424	0.562168	0.868216	0.868216		ALDEx2_t
0.40 mg/mL -0.80 mg/mL	p__Firmicutes|c__Clostridia|o__Clostridiales|f__Clostridiaceae|g__Butyricicoccus|s__Butyricicoccus pullicaecorum	-0.0272391	4.3344	-0.00480232	0.498701	0.536572	0.830603	0.585651	0.881098	0.881098		ALDEx2_t
0.40 mg/mL - 0.80 mg/mL	p__Firmicutes|c__Clostridia|o__Clostridiales|f__Lachnospiraceae|g__Anaerocolumna|s__Anaerocolumna xylanovorans	0.386786	4.08447	0.101003	0.45974	0.509412	0.819185	0.550541	0.859105	0.859105		ALDEx2_t
0.40 mg/mL -0.80 mg/mL	p__Firmicutes|c__Clostridia|o__Clostridiales|f__Ruminococcaceae|g__|s__[Clostridium] methylpentosum	-1.11007	3.68794	-0.274642	0.375	0.420968	0.763827	0.41367	0.792991	0.792991		ALDEx2_t
0.40 mg/mL - 0.80 mg/mL	p__Firmicutes|c__Clostridia|o__Clostridiales|f__|g__Monoglobus|s__Monoglobus pectinilyticus	-0.534955	4.17061	-0.113916	0.451948	0.506726	0.821537	0.563091	0.865481	0.865481		ALDEx2_t
[truncated: 287 more rows]

## Sheet: Table S5
Table S5. Differentially abundant species between treated vs. untreated Agr2-/- mice after 17 days of treatment. A negative Log2(FC) indicates that there is a decrease in species abundance following treatment.
[truncated: 53 more rows]

[truncated: 6 more sheets: Table S6, Table S7, Table S8, Table S9, Table S10, Table S11]
